# Supplementary material for: Pertussis upsurge, age shift and vaccine escape post-COVID-19 caused by ptxP3 macrolide-resistant Bordetella pertussis MT28 clone in China: a genomic epidemiology study
Source: bioRxiv or medRxiv preprint supplement (doi:10.1101/2024.04.16.24305932), 2024-04-23
Supplement: Supplementary file [file media-1.pdf]

## Supplementary appendix

**Supplementary figure 1. The number of reported pertussis cases in Children's Hospital of Fudan University (CHFU), Shanghai and China.**

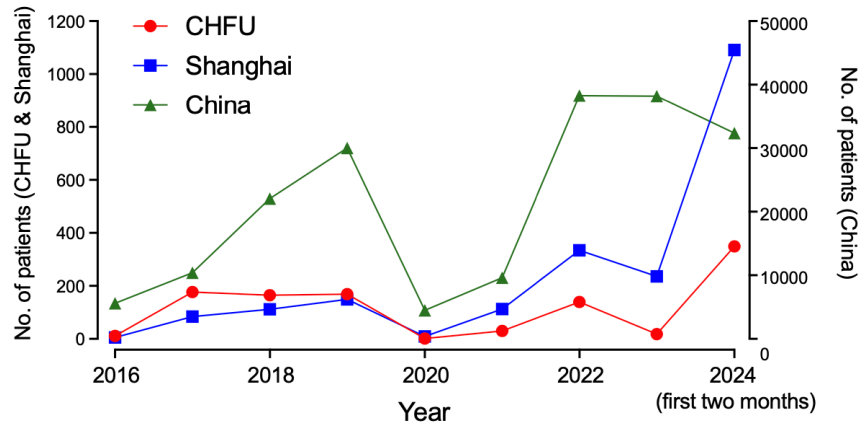

**Supplementary table 1. Clinical and laboratory characteristics of patients of different ages and vaccination status.**

|                                        | Total     | <i>ptxP1</i> | MR-MT28     | MS-MT28  | <i>ptxP3</i> -other | <i>p</i> -value (MR-MT28 vs others) |
|----------------------------------------|-----------|--------------|-------------|----------|---------------------|-------------------------------------|
| <b>0–1-year-old</b>                    |           |              |             |          |                     |                                     |
| <b>Clinical characteristics</b>        |           |              |             |          |                     |                                     |
| Spasmodic cough                        | 428 (93%) | 234 (95%)    | 41 (87%)    | 20 (95%) | 133 (93%)           |                                     |
| Paroxysmal cough                       | 384 (84%) | 207 (84%)    | 43 (91%)    | 19 (90%) | 115 (80%)           |                                     |
| Cockcrow-like cough                    | 88 (19%)  | 51 (21%)     | 8 (17%)     | 3 (14%)  | 26 (18%)            |                                     |
| Wheeze                                 | 123 (27%) | 67 (27%)     | 6 (13%)     | 11 (52%) | 39 (27%)            | All pairs <i>p</i> <0.05            |
| Sputum                                 | 314 (69%) | 162 (66%)    | 28 (60%)    | 20 (95%) | 104 (73%)           | MS-MT28: <i>p</i> <0.01             |
| Facial blushing                        | 234 (51%) | 120 (49%)    | 17 (36%)    | 12 (57%) | 85 (59%)            | <i>ptxP3</i> -other: <i>p</i> <0.01 |
| Post-tussive vomiting                  | 157 (34%) | 84 (34%)     | 11 (23%)    | 8 (38%)  | 54 (38%)            |                                     |
| Runny nose                             | 178 (39%) | 94 (38%)     | 19 (40%)    | 10 (48%) | 55 (38%)            |                                     |
| Fever history                          | 45 (10%)  | 31 (13%)     | 0 (0%)      | 3 (14%)  | 11 (8%)             | <i>ptxP1</i> : <i>p</i> <0.01       |
| Apnea                                  | 2 (0%)    | 1 (0%)       | 0 (0%)      | 0 (0%)   | 1 (1%)              | MS-MT28: <i>p</i> <0.05             |
| Hospitalization                        | 122 (27%) | 72 (29%)     | 9 (19%)     | 8 (38%)  | 33 (23%)            |                                     |
| Hospitalization days                   | 6 (5-10)  | 6.5 (5-10)   | 4.5 (1-6.5) | 6 (5-10) | 7 (5-11)            | <i>ptxP1</i> : <i>p</i> <0.05       |
|                                        |           |              |             |          |                     | <i>ptxP3</i> -other: <i>p</i> <0.05 |
| <b>Chest computed tomography (CT)</b>  |           |              |             |          |                     |                                     |
| Normal                                 | 84 (18%)  | 42 (17%)     | 12 (26%)    | 2 (10%)  | 28 (20%)            |                                     |
| Moderate (bronchitis)                  | 197 (43%) | 101 (41%)    | 22 (47%)    | 7 (33%)  | 67 (47%)            |                                     |
| Severe (bronchopneumonia or pneumonia) | 177 (39%) | 104 (42%)    | 13 (28%)    | 12 (57%) | 48 (34%)            | MS-MT28: <i>p</i> <0.05             |
| <b>Laboratory testing</b>              |           |              |             |          |                     |                                     |
| Abnormal CRP                           | 78 (12%)  | 19 (8%)      | 7 (15%)     | 1 (5%)   | 10 (7%)             |                                     |
| Abnormal WBC                           | 380 (58%) | 149 (62%)    | 25 (54%)    | 15 (71%) | 89 (65%)            |                                     |
| <b>&gt;1 year old</b>                  |           |              |             |          |                     |                                     |
| <b>Clinical characteristics</b>        |           |              |             |          |                     |                                     |
| Spasmodic cough                        | 162 (76%) | 47 (94%)     | 94 (66%)    | /        | 21 (95%)            | <i>ptxP1</i> : <i>p</i> <0.01       |
| Paroxysmal cough                       | 180 (84%) | 45 (90%)     | 115 (81%)   | /        | 20 (91%)            | <i>ptxP3</i> -other: <i>p</i> <0.01 |
| Cockcrow-like cough                    | 35 (16%)  | 9 (18%)      | 21 (15%)    | /        | 5 (23%)             |                                     |
| Wheeze                                 | 24 (11%)  | 14 (28%)     | 8 (6%)      | /        | 2 (9%)              | <i>ptxP1</i> : <i>p</i> <0.01       |
| Sputum                                 | 131 (61%) | 37 (74%)     | 79 (56%)    | /        | 15 (68%)            | <i>ptxP1</i> : <i>p</i> <0.05       |
| Facial blushing                        | 39 (18%)  | 15 (30%)     | 16 (11%)    | /        | 8 (36%)             | <i>ptxP1</i> : <i>p</i> <0.01       |
| Post-tussive vomiting                  | 45 (21%)  | 17 (34%)     | 21 (15%)    | /        | 7 (32%)             | <i>ptxP3</i> -other: <i>p</i> <0.01 |
| Runny nose                             | 72 (34%)  | 22 (44%)     | 43 (30%)    | /        | 7 (32%)             | <i>ptxP1</i> : <i>p</i> <0.01       |
| Fever history                          | 27 (13%)  | 7 (14%)      | 18 (13%)    | /        | 2 (9%)              | <i>ptxP3</i> -other: <i>p</i> <0.05 |
| Apnea                                  | 2 (1%)    | 1 (2%)       | 1 (1%)      | /        | 0 (0%)              |                                     |
| Hospitalization                        | 16 (7%)   | 9 (18%)      | 3 (2%)      | /        | 4 (18%)             | <i>ptxP1</i> : <i>p</i> <0.01       |
| Hospitalization days                   | 5.5 (4-9) | 6 (5-10)     | 1 (1-9)     | /        | 5 (3-7)             | <i>ptxP3</i> -other: <i>p</i> <0.01 |
| <b>Chest computed tomography (CT)</b>  |           |              |             |          |                     |                                     |
| Normal                                 | 69 (32%)  | 17 (34%)     | 46 (32%)    | /        | 6 (27%)             |                                     |

|                                        |           |           |           |              |           |                                                                      |
|----------------------------------------|-----------|-----------|-----------|--------------|-----------|----------------------------------------------------------------------|
| Moderate (bronchitis)                  | 97 (45%)  | 18 (36%)  | 68 (48%)  | /            | 11 (50%)  |                                                                      |
| Severe (bronchopneumonia or pneumonia) | 48 (22%)  | 15 (30%)  | 28 (20%)  | /            | 5 (23%)   |                                                                      |
| <b>Laboratory testing</b>              |           |           |           |              |           |                                                                      |
| Abnormal CRP                           | 40 (19%)  | 6 (12%)   | 29 (21%)  | /            | 5 (23%)   |                                                                      |
| Abnormal WBC                           | 102 (49%) | 28 (57%)  | 61 (45%)  | /            | 13 (59%)  |                                                                      |
| <b>Unvaccinated individuals</b>        |           |           |           |              |           |                                                                      |
| <b>Clinical characteristics</b>        |           |           |           |              |           |                                                                      |
| Spasmodic cough                        | 248 (95%) | 139 (98%) | 21 (95%)  | 10 (91%)     | 78 (90%)  |                                                                      |
| Paroxysmal cough                       | 215 (82%) | 118 (83%) | 19 (86%)  | 10 (91%)     | 68 (78%)  |                                                                      |
| Cockcrow-like cough                    | 48 (18%)  | 25 (18%)  | 4 (18%)   | 2 (18%)      | 17 (20%)  |                                                                      |
| Wheeze                                 | 69 (26%)  | 36 (25%)  | 5 (23%)   | 5 (45%)      | 23 (26%)  |                                                                      |
| Sputum                                 | 184 (70%) | 95 (67%)  | 15 (68%)  | 11 (100%)    | 63 (72%)  |                                                                      |
| Facial blushing                        | 134 (51%) | 70 (49%)  | 6 (27%)   | 6 (55%)      | 52 (60%)  | <i>ptxP3</i> -other: <i>p</i> <0.01                                  |
| Post-tussive vomiting                  | 94 (36%)  | 49 (35%)  | 8 (36%)   | 5 (45%)      | 32 (37%)  |                                                                      |
| Runny nose                             | 82 (31%)  | 51 (36%)  | 10 (45%)  | 4 (36%)      | 17 (20%)  | <i>ptxP3</i> -other: <i>p</i> <0.05                                  |
| Fever history                          | 20 (8%)   | 12 (8%)   | 0 (0%)    | 1 (9%)       | 7 (8%)    |                                                                      |
| Apnea                                  | 1 (0%)    | 0 (0%)    | 0 (0%)    | 0 (0%)       | 1 (1%)    |                                                                      |
| Hospitalization                        | 85 (32%)  | 47 (33%)  | 4 (18%)   | 5 (45%)      | 29 (33%)  |                                                                      |
| Hospitalization days                   | 7 (5-12)  | 6 (5-12)  | 7 (4-21)  | 6 (5.5-14.5) | 7 (5-11)  |                                                                      |
| <b>Chest computed tomography (CT)</b>  |           |           |           |              |           |                                                                      |
| Normal                                 | 50 (19%)  | 26 (18%)  | 5 (23%)   | 0 (0%)       | 19 (22%)  |                                                                      |
| Moderate (bronchitis)                  | 103 (39%) | 52 (37%)  | 11 (50%)  | 5 (45%)      | 35 (40%)  |                                                                      |
| Severe (bronchopneumonia or pneumonia) | 109 (42%) | 64 (45%)  | 6 (27%)   | 6 (55%)      | 33 (38%)  |                                                                      |
| <b>Laboratory testing</b>              |           |           |           |              |           |                                                                      |
| Abnormal CRP                           | 18 (7%)   | 7 (5%)    | 3 (14%)   | 1 (9%)       | 7 (8%)    |                                                                      |
| Abnormal WBC                           | 169 (67%) | 93 (67%)  | 13 (59%)  | 7 (64%)      | 56 (68%)  |                                                                      |
| <b>Vaccinated individuals</b>          |           |           |           |              |           |                                                                      |
| <b>Clinical characteristics</b>        |           |           |           |              |           |                                                                      |
| Spasmodic cough                        | 226 (80%) | 82 (92%)  | 100 (67%) | 3 (100%)     | 41 (98%)  | <i>ptxP1</i> : <i>p</i> <0.01<br><i>ptxP3</i> -other: <i>p</i> <0.01 |
| Paroxysmal cough                       | 240 (85%) | 77 (87%)  | 124 (83%) | 3 (100%)     | 36 (86%)  |                                                                      |
| Cockcrow-like cough                    | 49 (17%)  | 18 (20%)  | 21 (14%)  | 1 (33%)      | 9 (21%)   |                                                                      |
| Wheeze                                 | 44 (15%)  | 24 (27%)  | 8 (5%)    | 1 (33%)      | 11 (26%)  | <i>ptxP1</i> : <i>p</i> <0.01<br><i>ptxP3</i> -other: <i>p</i> <0.01 |
| Sputum                                 | 176 (62%) | 61 (69%)  | 82 (55%)  | 3 (100%)     | 30 (71%)  | <i>ptxP1</i> : <i>p</i> <0.05                                        |
| Facial blushing                        | 66 (23%)  | 30 (34%)  | 18 (12%)  | 1 (33%)      | 17 (40%)  | <i>ptxP1</i> : <i>p</i> <0.01<br><i>ptxP3</i> -other: <i>p</i> <0.01 |
| Post-tussive vomiting                  | 67 (24%)  | 32 (36%)  | 21 (14%)  | 1 (33%)      | 13 (31%)  | <i>ptxP1</i> : <i>p</i> <0.01<br><i>ptxP3</i> -other: <i>p</i> <0.05 |
| Runny nose                             | 110 (39%) | 40 (45%)  | 46 (31%)  | 3 (100%)     | 21 (50%)  | All pairs <i>p</i> <0.05                                             |
| Fever history                          | 34 (12%)  | 13 (15%)  | 17 (11%)  | 0 (0%)       | 4 (10%)   |                                                                      |
| Apnea                                  | 2 (1%)    | 1 (1%)    | 1 (1%)    | 0 (0%)       | 0 (0%)    |                                                                      |
| Hospitalization                        | 32 (11%)  | 19 (21%)  | 5 (3%)    | 0 (0%)       | 8 (19%)   | <i>ptxP1</i> : <i>p</i> <0.01<br><i>ptxP3</i> -other: <i>p</i> <0.01 |
| Hospitalization days                   | 6 (4-7)   | 6 (5-7)   | 1 (1-7)   | /            | 5 (4-7.5) | <i>ptxP1</i> -other: <i>p</i> <0.05                                  |
| <b>Chest computed tomography (CT)</b>  |           |           |           |              |           |                                                                      |
| Normal                                 | 87 (31%)  | 24 (27%)  | 51 (34%)  | 2 (67%)      | 10 (24%)  |                                                                      |
| Moderate (bronchitis)                  | 135 (48%) | 40 (45%)  | 71 (47%)  | 1 (33%)      | 23 (55%)  |                                                                      |
| Severe (bronchopneumonia or pneumonia) | 62 (22%)  | 25 (28%)  | 28 (19%)  | 0 (0%)       | 9 (21%)   |                                                                      |
| <b>Laboratory testing</b>              |           |           |           |              |           |                                                                      |
| Abnormal CRP                           | 48 (17%)  | 11 (12%)  | 31 (21%)  | /            | 6 (14%)   |                                                                      |
| Abnormal WBC                           | 146 (53%) | 51 (59%)  | 66 (46%)  | 3 (100%)     | 26 (62%)  |                                                                      |

Data are n (%) or median (IQR). CRP: C-reactive protein, WBC: white blood cell







|         |         |                  |      |      |        |     |   |   |   |   |   |   |   |   |    |   |   |               |    |   |             |
|---------|---------|------------------|------|------|--------|-----|---|---|---|---|---|---|---|---|----|---|---|---------------|----|---|-------------|
| SH251   | MS-MT28 | Children patient | 2018 | 0-1  | Male   | NA  | A | 3 | 1 | 1 | 2 | 1 | 4 | 1 | 1  | 1 | 1 | 2             | 2  | 4 | SRR27796332 |
| SH257   | MS-MT28 | Children patient | 2018 | 0-1  | Male   | Yes | A | 3 | 1 | 1 | 2 | 1 | 4 | 1 | 1  | 1 | 1 | 2             | 2  | 4 | SRR27796331 |
| SH261   | MS-MT28 | Children patient | 2018 | 0-1  | Female | No  | A | 3 | 1 | 1 | 2 | 1 | 4 | 1 | 1  | 1 | 1 | 2             | 2  | 4 | SRR27796330 |
| SH305   | MS-MT28 | Children patient | 2018 | 0-1  | Male   | Yes | A | 3 | 1 | 1 | 2 | 1 | 4 | 1 | 1  | 1 | 1 | 2             | 2  | 4 | SRR27796329 |
| SH352   | MS-MT28 | Children patient | 2018 | 0-1  | Male   | No  | A | 3 | 1 | 1 | 2 | 1 | 4 | 1 | 1  | 1 | 1 | PRN-deficient | 2  | 4 | SRR27796328 |
| SH357   | MS-MT28 | Children patient | 2019 | 0-1  | Male   | No  | A | 3 | 1 | 1 | 2 | 1 | 4 | 1 | 1  | 1 | 1 | 9             | 2  | 4 | SRR27796327 |
| SH362   | MS-MT28 | Household        | 2019 | >20  | Male   | Yes | A | 3 | 1 | 1 | 2 | 1 | 4 | 1 | 16 | 1 | 1 | 2             | 2  | 4 | SRR27796589 |
| SH365   | MS-MT28 | Children patient | 2019 | 0-1  | Male   | NA  | A | 3 | 1 | 1 | 2 | 1 | 4 | 1 | 16 | 1 | 1 | 2             | 2  | 4 | SRR27796326 |
| SH375   | MS-MT28 | Children patient | 2019 | 0-1  | Male   | NA  | A | 3 | 1 | 1 | 2 | 1 | 4 | 1 | 1  | 1 | 1 | 2             | 2  | 4 | SRR27796325 |
| SH418   | MS-MT28 | Children patient | 2019 | 0-1  | Male   | NA  | A | 3 | 1 | 1 | 2 | 1 | 4 | 1 | 16 | 1 | 1 | 2             | 2  | 4 | SRR27796324 |
| SH479   | MS-MT28 | Children patient | 2019 | 0-1  | Male   | No  | A | 3 | 1 | 1 | 2 | 1 | 4 | 1 | 1  | 1 | 1 | 2             | 2  | 4 | SRR27796596 |
| SH672   | MS-MT28 | Children patient | 2022 | 0-1  | Female | No  | A | 3 | 1 | 1 | 2 | 1 | 4 | 1 | 1  | 1 | 1 | 2             | 2  | 4 | SRR27796595 |
| SH82    | MS-MT28 | Children patient | 2017 | 0-1  | Female | Yes | A | 3 | 1 | 1 | 2 | 1 | 4 | 1 | 1  | 1 | 1 | 2             | 2  | 4 | SRR27796338 |
| SHBP110 | MS-MT28 | Children patient | 2017 | 0-1  | Female | No  | A | 3 | 1 | 1 | 2 | 1 | 4 | 1 | 1  | 1 | 1 | 2             | 2  | 4 | SRR27796594 |
| SHBP400 | MS-MT28 | Children patient | 2019 | 0-1  | Female | NA  | A | 3 | 1 | 1 | 2 | 1 | 4 | 1 | 1  | 1 | 1 | 2             | 2  | 4 | SRR27796593 |
| SHBP436 | MS-MT28 | Children patient | 2019 | 0-1  | Female | No  | A | 3 | 1 | 1 | 2 | 1 | 4 | 1 | 1  | 1 | 1 | 150           | 2  | 4 | SRR27796592 |
| SHP759  | MS-MT28 | Children patient | 2023 | 0-1  | Female | NA  | A | 3 | 1 | 1 | 2 | 1 | 4 | 1 | 1  | 1 | 1 | 2             | 2  | 4 | SRR27796423 |
| SH101   | ptxP1   | Household        | 2017 | >20  | Female | Yes | G | 1 | 1 | 1 | 1 | 1 | 4 | 3 | 1  | 1 | 1 | 1             | 2  | 4 | SRR27796271 |
| SH103   | ptxP1   | Children patient | 2017 | 0-1  | Female | No  | G | 1 | 1 | 1 | 1 | 1 | 4 | 3 | 1  | 1 | 1 | 1             | 2  | 4 | SRR27796451 |
| SH106   | ptxP1   | Household        | 2017 | >20  | Male   | Yes | G | 1 | 1 | 1 | 1 | 1 | 4 | 3 | 1  | 1 | 1 | 1             | 2  | 4 | SRR27796270 |
| SH107   | ptxP1   | Household        | 2017 | >20  | Female | Yes | G | 1 | 1 | 1 | 1 | 1 | 4 | 3 | 1  | 1 | 1 | 1             | 2  | 4 | SRR27796269 |
| SH112   | ptxP1   | Children patient | 2017 | 0-1  | Female | Yes | G | 1 | 1 | 1 | 1 | 1 | 4 | 3 | 1  | 1 | 1 | 1             | 2  | 4 | SRR27796440 |
| SH115   | ptxP1   | Children patient | 2017 | 0-1  | Female | Yes | G | 1 | 1 | 1 | 1 | 1 | 4 | 3 | 1  | 1 | 1 | 1             | 2  | 4 | SRR27796429 |
| SH116   | ptxP1   | Children patient | 2017 | 0-1  | Female | No  | G | 1 | 1 | 1 | 1 | 1 | 4 | 3 | 1  | 1 | 1 | 1             | 2  | 4 | SRR27796418 |
| SH117   | ptxP1   | Children patient | 2017 | 0-1  | Female | No  | G | 1 | 1 | 1 | 1 | 1 | 4 | 3 | 1  | 1 | 1 | 1             | 2  | 4 | SRR27796200 |
| SH118   | ptxP1   | Children patient | 2017 | 0-1  | Male   | NA  | G | 1 | 1 | 1 | 1 | 1 | 4 | 3 | 1  | 1 | 1 | 1             | 2  | 4 | SRR27796189 |
| SH119   | ptxP1   | Children patient | 2017 | 0-1  | Male   | NA  | G | 1 | 1 | 1 | 1 | 1 | 4 | 3 | 1  | 1 | 1 | 1             | 2  | 4 | SRR27796178 |
| SH12    | ptxP1   | Children patient | 2017 | 0-1  | Male   | Yes | G | 1 | 1 | 1 | 1 | 1 | 4 | 3 | 1  | 1 | 1 | 1             | 2  | 4 | SRR27796279 |
| SH120   | ptxP1   | Children patient | 2017 | 0-1  | Female | NA  | G | 1 | 1 | 1 | 1 | 1 | 4 | 3 | 1  | 1 | 1 | 1             | 2  | 4 | SRR27796409 |
| SH121   | ptxP1   | Children patient | 2017 | 0-1  | Male   | Yes | G | 1 | 1 | 1 | 1 | 1 | 4 | 3 | 1  | 1 | 1 | 4             | 2  | 4 | SRR27796398 |
| SH122   | ptxP1   | Children patient | 2017 | 0-1  | Male   | Yes | G | 1 | 1 | 1 | 1 | 1 | 4 | 3 | 1  | 1 | 1 | 1             | 2  | 4 | SRR27796387 |
| SH123   | ptxP1   | Children patient | 2017 | 0-1  | Male   | No  | G | 1 | 1 | 1 | 1 | 1 | 4 | 3 | 1  | 1 | 1 | 1             | 2  | 4 | SRR27796170 |
| SH125   | ptxP1   | Children patient | 2017 | 0-1  | Female | No  | G | 1 | 1 | 1 | 1 | 1 | 4 | 3 | 1  | 1 | 1 | 1             | 2  | 4 | SRR27796159 |
| SH126   | ptxP1   | Children patient | 2017 | 0-1  | Male   | No  | A | 1 | 1 | 1 | 1 | 1 | 4 | 1 | 1  | 4 | 1 | 1             | 2  | 4 | SRR27796148 |
| SH127   | ptxP1   | Children patient | 2017 | 0-1  | Male   | NA  | G | 1 | 1 | 1 | 1 | 1 | 4 | 3 | 1  | 1 | 1 | 1             | 2  | 4 | SRR27796357 |
| SH129   | ptxP1   | Children patient | 2017 | 0-1  | Male   | Yes | G | 1 | 1 | 1 | 1 | 1 | 4 | 3 | 1  | 1 | 1 | 1             | 2  | 4 | SRR27796345 |
| SH13    | ptxP1   | Children patient | 2017 | 0-1  | Male   | No  | G | 1 | 1 | 1 | 1 | 1 | 4 | 3 | 1  | 1 | 1 | 1             | 2  | 4 | SRR27796240 |
| SH130   | ptxP1   | Children patient | 2017 | 0-1  | Male   | NA  | G | 1 | 1 | 1 | 1 | 1 | 4 | 3 | 1  | 1 | 1 | 1             | 2  | 4 | SRR27796334 |
| SH135   | ptxP1   | Children patient | 2017 | 0-1  | Female | No  | G | 1 | 1 | 1 | 1 | 1 | 4 | 3 | 1  | 1 | 1 | 1             | 2  | 4 | SRR27796323 |
| SH141   | ptxP1   | Children patient | 2017 | 0-1  | Male   | No  | G | 1 | 1 | 1 | 1 | 1 | 4 | 3 | 1  | 1 | 1 | 1             | 2  | 4 | SRR27796586 |
| SH142   | ptxP1   | Children patient | 2017 | 0-1  | Female | NA  | A | 1 | 1 | 1 | 1 | 1 | 4 | 1 | 3  | 4 | 1 | 1             | 30 | 4 | SRR27796576 |
| SH145   | ptxP1   | Household        | 2017 | >20  | Female | Yes | G | 1 | 1 | 1 | 1 | 1 | 4 | 3 | 1  | 1 | 1 | 1             | 2  | 4 | SRR27796268 |
| SH146   | ptxP1   | Children patient | 2017 | 0-1  | Male   | NA  | G | 1 | 1 | 1 | 1 | 1 | 4 | 3 | 1  | 1 | 1 | 1             | 2  | 4 | SRR27796575 |
| SH149   | ptxP1   | Children patient | 2017 | 0-1  | Male   | NA  | A | 1 | 1 | 1 | 1 | 1 | 4 | 1 | 3  | 4 | 1 | 1             | 30 | 4 | SRR27796574 |
| SH151   | ptxP1   | Children patient | 2017 | 0-1  | Female | NA  | G | 1 | 1 | 1 | 1 | 1 | 4 | 3 | 1  | 1 | 1 | 1             | 2  | 4 | SRR27796573 |
| SH153   | ptxP1   | Children patient | 2017 | 0-1  | Female | NA  | G | 1 | 1 | 1 | 1 | 1 | 4 | 3 | 1  | 1 | 1 | 1             | 2  | 4 | SRR27796572 |
| SH154   | ptxP1   | Children patient | 2017 | 0-1  | Female | No  | G | 1 | 1 | 1 | 1 | 1 | 4 | 3 | 1  | 1 | 1 | 1             | 2  | 4 | SRR27796571 |
| SH156   | ptxP1   | Children patient | 2017 | 0-1  | Male   | No  | G | 1 | 1 | 1 | 1 | 1 | 4 | 3 | 1  | 1 | 1 | 1             | 2  | 4 | SRR27796569 |
| SH157   | ptxP1   | Children patient | 2017 | 0-1  | Female | No  | G | 1 | 1 | 1 | 1 | 1 | 4 | 3 | 1  | 1 | 1 | 1             | 2  | 4 | SRR27796568 |
| SH158   | ptxP1   | Children patient | 2017 | 0-1  | Female | No  | G | 1 | 1 | 1 | 1 | 1 | 4 | 3 | 1  | 1 | 1 | 1             | 2  | 4 | SRR27796567 |
| SH16    | ptxP1   | Children patient | 2017 | 8-9  | Male   | Yes | G | 1 | 1 | 1 | 1 | 1 | 4 | 3 | 1  | 1 | 1 | 1             | 2  | 4 | SRR27796201 |
| SH162   | ptxP1   | Children patient | 2017 | 0-1  | Male   | NA  | G | 1 | 1 | 1 | 1 | 1 | 4 | 3 | 1  | 1 | 1 | 1             | 2  | 4 | SRR27796566 |
| SH163   | ptxP1   | Children patient | 2017 | 0-1  | Female | NA  | G | 1 | 1 | 1 | 1 | 1 | 4 | 3 | 1  | 1 | 1 | 1             | 2  | 4 | SRR27796565 |
| SH168   | ptxP1   | Children patient | 2017 | 0-1  | Male   | NA  | A | 1 | 1 | 1 | 1 | 1 | 4 | 1 | 1  | 4 | 1 | 1             | 2  | 4 | SRR27796564 |
| SH169   | ptxP1   | Children patient | 2017 | 0-1  | Female | NA  | G | 1 | 1 | 1 | 1 | 1 | 4 | 3 | 1  | 1 | 1 | 1             | 2  | 4 | SRR27796563 |
| SH17    | ptxP1   | Children patient | 2017 | 0-1  | Female | No  | G | 1 | 1 | 1 | 1 | 1 | 4 | 3 | 1  | 1 | 1 | 1             | 2  | 4 | SRR27796346 |
| SH170   | ptxP1   | Household        | 2017 | >20  | Female | Yes | G | 1 | 1 | 1 | 1 | 1 | 4 | 3 | 1  | 1 | 1 | 1             | 2  | 4 | SRR27796266 |
| SH172   | ptxP1   | Children patient | 2017 | 0-1  | Female | NA  | G | 1 | 1 | 1 | 1 | 1 | 4 | 3 | 1  | 1 | 1 | 1             | 2  | 4 | SRR27796562 |
| SH173   | ptxP1   | Children patient | 2017 | 0-1  | Male   | NA  | G | 1 | 1 | 1 | 1 | 1 | 4 | 3 | 1  | 1 | 1 | 1             | 2  | 4 | SRR27796561 |
| SH174   | ptxP1   | Children patient | 2017 | 0-1  | Female | No  | G | 1 | 1 | 1 | 1 | 1 | 4 | 3 | 1  | 1 | 1 | 1             | 2  | 4 | SRR27796380 |
| SH175   | ptxP1   | Children patient | 2017 | 0-1  | Male   | No  | G | 1 | 1 | 1 | 1 | 1 | 4 | 3 | 1  | 1 | 1 | 1             | 2  | 4 | SRR27796378 |
| SH176   | ptxP1   | Children patient | 2017 | 0-1  | Male   | NA  | G | 1 | 1 | 1 | 1 | 1 | 4 | 3 | 1  | 1 | 1 | 1             | 2  | 4 | SRR27796377 |
| SH177   | ptxP1   | Children patient | 2017 | 0-1  | Male   | NA  | G | 1 | 1 | 1 | 1 | 1 | 4 | 3 | 1  | 1 | 1 | 1             | 2  | 4 | SRR27796376 |
| SH18    | ptxP1   | Children patient | 2017 | 9-10 | Male   | Yes | G | 1 | 1 | 1 | 1 | 1 | 4 | 3 | 1  | 1 | 1 | 1             | 2  | 4 | SRR27796570 |
| SH184   | ptxP1   | Children patient | 2018 | 0-1  | Female | No  | G | 1 | 1 | 1 | 1 | 1 | 4 | 3 | 1  | 1 | 1 | 1             | 2  | 4 | SRR27796375 |
| SH190   | ptxP1   | Children patient | 2018 | 0-1  | Male   | NA  | G | 1 | 1 | 1 | 1 | 1 | 4 | 3 | 1  | 1 | 1 | 1             | 2  | 4 | SRR27796374 |
| SH191   | ptxP1   | Children patient | 2018 | 0-1  | Male   | No  | G | 1 | 1 | 1 | 1 | 1 | 4 | 3 | 1  | 1 | 1 | 1             | 2  | 4 | SRR27796373 |
| SH192   | ptxP1   | Children patient | 2018 | 0-1  | Male   | No  | G | 1 | 1 | 1 | 1 | 1 | 4 | 3 | 1  | 1 | 1 | 1             | 2  | 4 | SRR27796372 |
| SH193   | ptxP1   | Household        | 2018 | >20  | Female | Yes | G | 1 | 1 | 1 | 1 | 1 | 4 | 3 | 1  | 1 | 1 | 1             | 2  | 4 | SRR27796265 |







|       |       |                  |      |     |        |     |   |   |   |   |   |   |   |   |   |   |   |   |   |               |   |             |             |
|-------|-------|------------------|------|-----|--------|-----|---|---|---|---|---|---|---|---|---|---|---|---|---|---------------|---|-------------|-------------|
| SH489 | ptxP1 | Children patient | 2019 | 0-1 | Female | No  | G | 1 | 1 | 1 | 1 | 1 | 4 | 3 | 1 | 1 | 1 | 1 | 1 | 2             | 4 | SRR27796551 |             |
| SH49  | ptxP1 | Children patient | 2017 | 0-1 | Male   | No  | G | 1 | 1 | 1 | 1 | 1 | 4 | 3 | 1 | 1 | 1 | 1 | 1 | 2             | 4 | SRR27796526 |             |
| SH490 | ptxP1 | Children patient | 2019 | 0-1 | Female | No  | G | 1 | 1 | 1 | 1 | 1 | 4 | 3 | 1 | 1 | 1 | 1 | 1 | 2             | 4 | SRR27796550 |             |
| SH492 | ptxP1 | Children patient | 2019 | 0-1 | Female | No  | G | 1 | 1 | 1 | 1 | 1 | 4 | 3 | 1 | 1 | 1 | 1 | 1 | 2             | 4 | SRR27796549 |             |
| SH494 | ptxP1 | Children patient | 2019 | 0-1 | Male   | No  | G | 1 | 1 | 1 | 1 | 1 | 4 | 3 | 1 | 1 | 1 | 1 | 4 | 2             | 4 | SRR27796547 |             |
| SH496 | ptxP1 | Children patient | 2019 | 0-1 | Male   | Yes | G | 1 | 1 | 1 | 1 | 1 | 4 | 3 | 1 | 1 | 1 | 1 | 1 | 2             | 4 | SRR27796546 |             |
| SH497 | ptxP1 | Children patient | 2019 | 0-1 | Male   | Yes | G | 1 | 1 | 1 | 1 | 1 | 4 | 3 | 1 | 1 | 1 | 1 | 1 | 2             | 4 | SRR27796545 |             |
| SH498 | ptxP1 | Children patient | 2019 | 0-1 | Male   | No  | G | 1 | 1 | 1 | 1 | 1 | 4 | 3 | 1 | 1 | 1 | 1 | 1 | 2             | 4 | SRR27796544 |             |
| SH500 | ptxP1 | Children patient | 2019 | 0-1 | Female | NA  | G | 1 | 1 | 1 | 1 | 1 | 4 | 3 | 1 | 1 | 1 | 1 | 1 | PRN-deficient | 2 | 4           | SRR27796543 |
| SH518 | ptxP1 | Children patient | 2019 | 0-1 | Male   | No  | G | 1 | 1 | 1 | 1 | 1 | 4 | 3 | 1 | 1 | 1 | 1 | 1 | 2             | 4 | SRR27796542 |             |
| SH52  | ptxP1 | Children patient | 2017 | 0-1 | Female | Yes | G | 1 | 1 | 1 | 1 | 1 | 4 | 3 | 1 | 1 | 1 | 1 | 1 | 2             | 4 | SRR27796093 |             |
| SH523 | ptxP1 | Children patient | 2019 | 0-1 | Male   | No  | G | 1 | 1 | 1 | 1 | 1 | 4 | 3 | 1 | 1 | 1 | 1 | 1 | 2             | 4 | SRR27796541 |             |
| SH527 | ptxP1 | Children patient | 2021 | 0-1 | Male   | No  | G | 1 | 1 | 1 | 1 | 1 | 4 | 3 | 1 | 1 | 1 | 1 | 1 | 2             | 4 | SRR27796540 |             |
| SH529 | ptxP1 | Children patient | 2021 | 4-5 | Male   | Yes | G | 1 | 1 | 1 | 1 | 1 | 4 | 3 | 1 | 1 | 1 | 1 | 1 | 2             | 4 | SRR27796539 |             |
| SH531 | ptxP1 | Household        | 2021 | >20 | Male   | Yes | G | 1 | 1 | 1 | 1 | 1 | 4 | 3 | 1 | 1 | 1 | 1 | 1 | 2             | 4 | SRR27796261 |             |
| SH545 | ptxP1 | Children patient | 2021 | 0-1 | Male   | No  | G | 1 | 1 | 1 | 1 | 1 | 4 | 3 | 1 | 1 | 1 | 1 | 1 | PRN-deficient | 2 | 4           | SRR27796538 |
| SH547 | ptxP1 | Children patient | 2021 | 0-1 | Male   | No  | G | 1 | 1 | 1 | 1 | 1 | 4 | 3 | 1 | 1 | 1 | 1 | 1 | 2             | 4 | SRR27796536 |             |
| SH548 | ptxP1 | Children patient | 2021 | 7-8 | Male   | Yes | G | 1 | 1 | 1 | 1 | 1 | 4 | 3 | 1 | 1 | 1 | 1 | 1 | 2             | 4 | SRR27796535 |             |
| SH55  | ptxP1 | Children patient | 2017 | 0-1 | Female | No  | G | 1 | 1 | 1 | 1 | 1 | 4 | 3 | 1 | 1 | 1 | 1 | 1 | PRN-deficient | 5 | 4           | SRR27796082 |
| SH551 | ptxP1 | Household        | 2021 | >20 | Female | Yes | G | 1 | 1 | 1 | 1 | 1 | 4 | 3 | 1 | 1 | 1 | 1 | 1 | 2             | 4 | SRR27796260 |             |
| SH553 | ptxP1 | Children patient | 2021 | 6-7 | Female | Yes | G | 1 | 1 | 1 | 1 | 1 | 4 | 3 | 1 | 1 | 1 | 1 | 1 | 2             | 4 | SRR27796534 |             |
| SH555 | ptxP1 | Children patient | 2021 | 5-6 | Female | Yes | G | 1 | 1 | 1 | 1 | 1 | 4 | 3 | 1 | 1 | 1 | 1 | 1 | 2             | 4 | SRR27796533 |             |
| SH556 | ptxP1 | Children patient | 2021 | 0-1 | Male   | NA  | G | 1 | 1 | 1 | 1 | 1 | 4 | 3 | 1 | 1 | 1 | 1 | 1 | 2             | 4 | SRR27796532 |             |
| SH557 | ptxP1 | Children patient | 2021 | 0-1 | Male   | NA  | G | 1 | 1 | 1 | 1 | 1 | 4 | 3 | 1 | 1 | 1 | 1 | 1 | 2             | 4 | SRR27796531 |             |
| SH56  | ptxP1 | Children patient | 2017 | 0-1 | Male   | Yes | G | 1 | 1 | 1 | 1 | 1 | 4 | 3 | 1 | 1 | 1 | 1 | 1 | 2             | 4 | SRR27796071 |             |
| SH57  | ptxP1 | Children patient | 2017 | 0-1 | Male   | No  | G | 1 | 1 | 1 | 1 | 1 | 4 | 3 | 1 | 1 | 1 | 1 | 1 | 2             | 4 | SRR27796518 |             |
| SH58  | ptxP1 | Household        | 2017 | >20 | Female | Yes | G | 1 | 1 | 1 | 1 | 1 | 4 | 3 | 1 | 1 | 1 | 1 | 1 | 2             | 4 | SRR27796275 |             |
| SH59  | ptxP1 | Children patient | 2017 | 0-1 | Male   | Yes | G | 1 | 1 | 1 | 1 | 1 | 4 | 3 | 1 | 1 | 1 | 1 | 1 | 2             | 4 | SRR27796507 |             |
| SH595 | ptxP1 | Children patient | 2022 | 5-6 | Female | Yes | G | 1 | 1 | 1 | 1 | 1 | 4 | 3 | 1 | 1 | 1 | 1 | 1 | 2             | 4 | SRR27796530 |             |
| SH6   | ptxP1 | Children patient | 2016 | 0-1 | Male   | No  | G | 1 | 1 | 1 | 1 | 1 | 4 | 3 | 1 | 1 | 1 | 1 | 1 | 2             | 4 | SRR27796322 |             |
| SH60  | ptxP1 | Children patient | 2017 | 0-1 | Male   | Yes | G | 1 | 1 | 1 | 1 | 1 | 4 | 3 | 1 | 1 | 1 | 1 | 1 | 2             | 4 | SRR27796496 |             |
| SH601 | ptxP1 | Children patient | 2022 | 8-9 | Female | Yes | G | 1 | 1 | 1 | 1 | 1 | 4 | 3 | 1 | 1 | 1 | 1 | 1 | 2             | 4 | SRR27796529 |             |
| SH62  | ptxP1 | Children patient | 2017 | 0-1 | Male   | Yes | G | 1 | 1 | 1 | 1 | 1 | 4 | 3 | 1 | 1 | 1 | 1 | 1 | 2             | 4 | SRR27796278 |             |
| SH627 | ptxP1 | Children patient | 2022 | 6-7 | Male   | Yes | G | 1 | 1 | 1 | 1 | 1 | 4 | 3 | 1 | 1 | 1 | 1 | 1 | 2             | 4 | SRR27796528 |             |
| SH628 | ptxP1 | Children patient | 2022 | 7-8 | Female | Yes | G | 1 | 1 | 1 | 1 | 1 | 4 | 3 | 1 | 1 | 1 | 1 | 1 | 2             | 4 | SRR27796527 |             |
| SH640 | ptxP1 | Children patient | 2022 | 1-2 | Male   | Yes | G | 1 | 1 | 1 | 1 | 1 | 4 | 3 | 1 | 1 | 1 | 1 | 1 | 2             | 4 | SRR27796525 |             |
| SH646 | ptxP1 | Children patient | 2022 | 8-9 | Female | Yes | G | 1 | 1 | 1 | 1 | 1 | 4 | 3 | 1 | 1 | 1 | 1 | 1 | 2             | 4 | SRR27796102 |             |
| SH659 | ptxP1 | Children patient | 2022 | 5-6 | Female | Yes | G | 1 | 1 | 1 | 1 | 1 | 4 | 3 | 1 | 1 | 1 | 1 | 1 | 2             | 4 | SRR27796101 |             |
| SH66  | ptxP1 | Children patient | 2017 | 0-1 | Male   | Yes | G | 1 | 1 | 1 | 1 | 1 | 4 | 3 | 1 | 1 | 1 | 1 | 1 | 2             | 4 | SRR27796267 |             |
| SH67  | ptxP1 | Children patient | 2017 | 0-1 | Male   | No  | G | 1 | 1 | 1 | 1 | 1 | 4 | 3 | 1 | 1 | 1 | 1 | 1 | 2             | 4 | SRR27796256 |             |
| SH674 | ptxP1 | Children patient | 2022 | 4-5 | Male   | Yes | G | 1 | 1 | 1 | 1 | 1 | 4 | 3 | 1 | 1 | 1 | 1 | 1 | 2             | 4 | SRR27796100 |             |
| SH677 | ptxP1 | Household        | 2022 | >20 | Female | Yes | G | 1 | 1 | 1 | 1 | 1 | 4 | 3 | 1 | 1 | 1 | 1 | 1 | 2             | 4 | SRR27796259 |             |
| SH679 | ptxP1 | Household        | 2022 | >20 | Female | Yes | G | 1 | 1 | 1 | 1 | 1 | 4 | 3 | 1 | 1 | 1 | 1 | 1 | 2             | 4 | SRR27796258 |             |
| SH681 | ptxP1 | Children patient | 2022 | 0-1 | Male   | No  | G | 1 | 1 | 1 | 1 | 1 | 4 | 3 | 1 | 1 | 1 | 1 | 1 | 2             | 4 | SRR27796099 |             |
| SH694 | ptxP1 | Children patient | 2022 | 0-1 | Male   | NA  | G | 1 | 1 | 1 | 1 | 1 | 4 | 3 | 1 | 1 | 1 | 1 | 1 | 2             | 4 | SRR27796098 |             |
| SH7   | ptxP1 | Children patient | 2016 | 0-1 | Male   | No  | G | 1 | 1 | 1 | 1 | 1 | 4 | 3 | 1 | 1 | 1 | 1 | 1 | 2             | 4 | SRR27796321 |             |
| SH70  | ptxP1 | Children patient | 2017 | 0-1 | Female | No  | G | 1 | 1 | 1 | 1 | 1 | 4 | 3 | 1 | 1 | 1 | 1 | 1 | 2             | 4 | SRR27796029 |             |
| SH701 | ptxP1 | Children patient | 2022 | 5-6 | Male   | Yes | G | 1 | 1 | 1 | 1 | 1 | 4 | 3 | 1 | 1 | 1 | 1 | 1 | 2             | 4 | SRR27796097 |             |
| SH703 | ptxP1 | Children patient | 2022 | 7-8 | Male   | Yes | G | 1 | 1 | 1 | 1 | 1 | 4 | 3 | 1 | 1 | 1 | 1 | 1 | 2             | 4 | SRR27796096 |             |
| SH71  | ptxP1 | Household        | 2017 | >20 | Female | Yes | G | 1 | 1 | 1 | 1 | 1 | 4 | 3 | 1 | 1 | 1 | 1 | 1 | 2             | 4 | SRR27796274 |             |
| SH718 | ptxP1 | Children patient | 2022 | 0-1 | Female | No  | G | 1 | 1 | 1 | 1 | 1 | 4 | 3 | 1 | 1 | 1 | 1 | 1 | 2             | 4 | SRR27796095 |             |
| SH719 | ptxP1 | Children patient | 2022 | 0-1 | Female | NA  | G | 1 | 1 | 1 | 1 | 1 | 4 | 3 | 1 | 1 | 1 | 1 | 1 | PRN-deficient | 2 | 4           | SRR27796094 |
| SH727 | ptxP1 | Children patient | 2022 | 4-5 | Female | Yes | G | 1 | 1 | 1 | 1 | 1 | 4 | 3 | 1 | 1 | 1 | 1 | 1 | 2             | 4 | SRR27796092 |             |
| SH73  | ptxP1 | Children patient | 2017 | 0-1 | Male   | No  | G | 1 | 1 | 1 | 1 | 1 | 4 | 3 | 1 | 1 | 1 | 1 | 1 | 2             | 4 | SRR27796018 |             |
| SH735 | ptxP1 | Children patient | 2022 | 5-6 | Female | Yes | G | 1 | 1 | 1 | 1 | 1 | 4 | 3 | 1 | 1 | 1 | 1 | 1 | 2             | 4 | SRR27796091 |             |
| SH746 | ptxP1 | Children patient | 2022 | 5-6 | Male   | Yes | G | 1 | 1 | 1 | 1 | 1 | 4 | 3 | 1 | 1 | 1 | 1 | 1 | 2             | 4 | SRR27796090 |             |
| SH76  | ptxP1 | Children patient | 2017 | 0-1 | Male   | Yes | G | 1 | 1 | 1 | 1 | 1 | 4 | 3 | 1 | 1 | 1 | 1 | 1 | 2             | 4 | SRR27796007 |             |
| SH78  | ptxP1 | Children patient | 2017 | 0-1 | Male   | Yes | G | 1 | 1 | 1 | 1 | 1 | 4 | 3 | 1 | 1 | 1 | 1 | 1 | 2             | 4 | SRR27795996 |             |
| SH79  | ptxP1 | Children patient | 2017 | 0-1 | Male   | No  | G | 1 | 1 | 1 | 1 | 1 | 4 | 3 | 1 | 1 | 1 | 1 | 1 | 2             | 4 | SRR27796479 |             |
| SH80  | ptxP1 | Household        | 2017 | >20 | Female | Yes | G | 1 | 1 | 1 | 1 | 1 | 4 | 3 | 1 | 1 | 1 | 1 | 1 | 2             | 4 | SRR27796273 |             |
| SH83  | ptxP1 | Children patient | 2017 | 0-1 | Female | No  | G | 1 | 1 | 1 | 1 | 1 | 4 | 3 | 1 | 1 | 1 | 1 | 1 | 2             | 4 | SRR27796468 |             |
| SH84  | ptxP1 | Children patient | 2017 | 0-1 | Female | No  | G | 1 | 1 | 1 | 1 | 1 | 4 | 3 | 1 | 1 | 1 | 1 | 1 | 2             | 4 | SRR27796457 |             |
| SH9   | ptxP1 | Children patient | 2016 | 0-1 | Male   | No  | G | 1 | 1 | 1 | 1 | 1 | 4 | 3 | 1 | 1 | 1 | 1 | 1 | 2             | 4 | SRR27796560 |             |
| SH91  | ptxP1 | Children patient | 2017 | 0-1 | Female | No  | G | 1 | 1 | 1 | 1 | 1 | 4 | 3 | 1 | 1 | 1 | 1 | 1 | 2             | 4 | SRR27796239 |             |
| SH92  | ptxP1 | Children patient | 2017 | 1-2 | Female | Yes | G | 1 | 1 | 1 | 1 | 1 | 4 | 3 | 1 | 1 | 1 | 1 | 1 | 2             | 4 | SRR27796228 |             |
| SH93  | ptxP1 | Children patient | 2017 | 3-4 | Male   | Yes | G | 1 | 1 | 1 | 1 | 1 | 4 | 3 | 1 | 1 | 1 | 1 | 1 | 2             | 4 | SRR27796217 |             |
| SH94  | ptxP1 | Household        | 2017 | >20 | Female | Yes | G | 1 | 1 | 1 | 1 | 1 | 4 | 3 | 1 | 1 | 1 | 1 | 1 | 2             | 4 | SRR27796272 |             |
| SH96  | ptxP1 | Children patient | 2017 | 0-1 | Female | No  | G | 1 | 1 | 1 | 1 | 1 | 4 | 3 | 1 | 1 | 1 | 1 | 4 | 2             | 4 | SRR27795990 |             |
| SH97  | ptxP1 | Children patient | 2017 | 0-1 | Female | No  | G | 1 | 1 | 1 | 1 | 1 | 4 | 3 | 1 | 1 | 1 | 1 | 1 | 2             | 4 | SRR27796617 |             |

|          |             |                  |      |     |        |     |   |   |   |   |   |   |   |   |   |   |   |   |               |   |             |             |
|----------|-------------|------------------|------|-----|--------|-----|---|---|---|---|---|---|---|---|---|---|---|---|---------------|---|-------------|-------------|
| SH98     | ptxP1       | Children patient | 2017 | 0-1 | Female | Yes | G | 1 | 1 | 1 | 1 | 1 | 4 | 3 | 1 | 1 | 1 | 1 | 2             | 4 | SRR27796006 |             |
| SHP113   | ptxP1       | Children patient | 2017 | 0-1 | Male   | Yes | G | 1 | 1 | 1 | 1 | 1 | 4 | 3 | 1 | 1 | 1 | 1 | 2             | 4 | SRR27796089 |             |
| SHP14    | ptxP1       | Children patient | 2017 | 0-1 | Male   | No  | G | 1 | 1 | 1 | 1 | 1 | 4 | 3 | 1 | 1 | 1 | 1 | 2             | 4 | SRR27796088 |             |
| SHP15    | ptxP1       | Children patient | 2017 | 0-1 | Female | No  | G | 1 | 1 | 1 | 1 | 1 | 4 | 3 | 1 | 1 | 1 | 1 | 2             | 4 | SRR27796087 |             |
| SHP189   | ptxP1       | Children patient | 2018 | 0-1 | Female | NA  | G | 1 | 1 | 1 | 1 | 1 | 4 | 3 | 1 | 1 | 1 | 1 | 2             | 4 | SRR27796086 |             |
| SHP203   | ptxP1       | Children patient | 2018 | 0-1 | Male   | NA  | G | 1 | 1 | 1 | 1 | 1 | 4 | 3 | 1 | 1 | 1 | 1 | 2             | 4 | SRR27796085 |             |
| SHP209   | ptxP1       | Children patient | 2018 | 0-1 | Female | No  | G | 1 | 1 | 1 | 1 | 1 | 4 | 3 | 1 | 1 | 1 | 1 | 2             | 4 | SRR27796084 |             |
| SHP211   | ptxP1       | Children patient | 2018 | 0-1 | Male   | No  | G | 1 | 1 | 1 | 1 | 1 | 4 | 3 | 1 | 1 | 1 | 1 | 2             | 4 | SRR27796083 |             |
| SHP213   | ptxP1       | Children patient | 2018 | 0-1 | Female | NA  | G | 1 | 1 | 1 | 1 | 1 | 4 | 3 | 1 | 1 | 1 | 1 | 2             | 4 | SRR27796081 |             |
| SHP22    | ptxP1       | Children patient | 2017 | 1-2 | Male   | Yes | G | 1 | 1 | 1 | 1 | 1 | 4 | 3 | 1 | 1 | 1 | 1 | 2             | 4 | SRR27796080 |             |
| SHP24    | ptxP1       | Children patient | 2017 | 0-1 | Male   | No  | G | 1 | 1 | 1 | 1 | 1 | 4 | 3 | 1 | 1 | 1 | 1 | 2             | 4 | SRR27796079 |             |
| SHP270   | ptxP1       | Children patient | 2018 | 0-1 | Male   | NA  | G | 1 | 1 | 1 | 1 | 1 | 4 | 3 | 1 | 1 | 1 | 1 | 2             | 4 | SRR27796078 |             |
| SHP280   | ptxP1       | Children patient | 2018 | 0-1 | Male   | NA  | G | 1 | 1 | 1 | 1 | 1 | 4 | 3 | 1 | 1 | 1 | 1 | 2             | 4 | SRR27796077 |             |
| SHP31    | ptxP1       | Children patient | 2017 | 0-1 | Male   | No  | G | 1 | 1 | 1 | 1 | 1 | 4 | 3 | 1 | 1 | 1 | 1 | 2             | 4 | SRR27796076 |             |
| SHP331   | ptxP1       | Children patient | 2018 | 4-5 | Female | Yes | G | 1 | 1 | 1 | 1 | 1 | 4 | 3 | 1 | 1 | 1 | 1 | 2             | 4 | SRR27796075 |             |
| SHP332   | ptxP1       | Children patient | 2018 | 1-2 | Male   | Yes | G | 1 | 1 | 1 | 1 | 1 | 4 | 3 | 1 | 1 | 1 | 1 | 2             | 4 | SRR27796074 |             |
| SHP337   | ptxP1       | Children patient | 2018 | 0-1 | Female | Yes | G | 1 | 1 | 1 | 1 | 1 | 4 | 3 | 1 | 1 | 1 | 1 | 2             | 4 | SRR27796073 |             |
| SHP338   | ptxP1       | Children patient | 2018 | 0-1 | Female | No  | G | 1 | 1 | 1 | 1 | 1 | 4 | 3 | 1 | 1 | 1 | 1 | 2             | 4 | SRR27796072 |             |
| SHP340   | ptxP1       | Children patient | 2018 | 0-1 | Male   | No  | G | 1 | 1 | 1 | 1 | 1 | 4 | 3 | 1 | 1 | 1 | 1 | 2             | 4 | SRR27796070 |             |
| SHP341   | ptxP1       | Children patient | 2018 | 0-1 | Female | No  | G | 1 | 1 | 1 | 1 | 1 | 4 | 3 | 1 | 1 | 1 | 1 | 2             | 4 | SRR27796069 |             |
| SHP342   | ptxP1       | Children patient | 2018 | 7-8 | Male   | No  | G | 1 | 1 | 1 | 1 | 1 | 4 | 3 | 1 | 1 | 1 | 1 | PRN-deficient | 2 | 4           | SRR27796068 |
| SHP344   | ptxP1       | Children patient | 2018 | 0-1 | Female | No  | G | 1 | 1 | 1 | 1 | 1 | 4 | 3 | 1 | 1 | 1 | 1 | 2             | 4 | SRR27796067 |             |
| SHP345   | ptxP1       | Children patient | 2018 | 1-2 | Female | Yes | G | 1 | 1 | 1 | 1 | 1 | 4 | 3 | 1 | 1 | 1 | 1 | 2             | 4 | SRR27796524 |             |
| SHP346   | ptxP1       | Children patient | 2018 | 0-1 | Male   | No  | G | 1 | 1 | 1 | 1 | 1 | 4 | 3 | 1 | 1 | 1 | 1 | PRN-deficient | 2 | 4           | SRR27796523 |
| SHP354   | ptxP1       | Children patient | 2018 | 0-1 | Female | Yes | G | 1 | 1 | 1 | 1 | 1 | 4 | 3 | 1 | 1 | 1 | 1 | 2             | 4 | SRR27796522 |             |
| SHP383   | ptxP1       | Children patient | 2019 | 0-1 | Female | Yes | G | 1 | 1 | 1 | 1 | 1 | 4 | 3 | 1 | 1 | 1 | 1 | 2             | 4 | SRR27796521 |             |
| SHP385   | ptxP1       | Children patient | 2019 | 0-1 | Female | NA  | G | 1 | 1 | 1 | 1 | 1 | 4 | 3 | 1 | 1 | 1 | 1 | 2             | 4 | SRR27796520 |             |
| SHP387   | ptxP1       | Children patient | 2019 | 0-1 | Male   | No  | G | 1 | 1 | 1 | 1 | 1 | 4 | 3 | 1 | 1 | 1 | 1 | PRN-deficient | 2 | 4           | SRR27796519 |
| SHP388   | ptxP1       | Children patient | 2019 | 0-1 | Male   | No  | G | 1 | 1 | 1 | 1 | 1 | 4 | 3 | 1 | 1 | 1 | 1 | 2             | 4 | SRR27796517 |             |
| SHP389   | ptxP1       | Children patient | 2019 | 0-1 | Male   | No  | G | 1 | 1 | 1 | 1 | 1 | 4 | 3 | 1 | 1 | 1 | 1 | 2             | 4 | SRR27796516 |             |
| SHP390   | ptxP1       | Children patient | 2019 | 0-1 | Female | NA  | G | 1 | 1 | 1 | 1 | 1 | 4 | 3 | 1 | 1 | 1 | 1 | PRN-deficient | 2 | 4           | SRR27796515 |
| SHP393   | ptxP1       | Children patient | 2019 | 0-1 | Female | Yes | G | 1 | 1 | 1 | 1 | 1 | 4 | 3 | 1 | 1 | 1 | 1 | 2             | 4 | SRR27796514 |             |
| SHP394   | ptxP1       | Children patient | 2019 | 1-2 | Male   | Yes | G | 1 | 1 | 1 | 1 | 1 | 4 | 3 | 1 | 1 | 1 | 1 | 2             | 4 | SRR27796513 |             |
| SHP395   | ptxP1       | Children patient | 2019 | 5-6 | Male   | Yes | G | 1 | 1 | 1 | 1 | 1 | 4 | 3 | 1 | 1 | 1 | 1 | 2             | 4 | SRR27796512 |             |
| SHP397   | ptxP1       | Children patient | 2019 | 0-1 | Male   | NA  | G | 1 | 1 | 1 | 1 | 1 | 4 | 3 | 1 | 1 | 1 | 1 | 2             | 4 | SRR27796511 |             |
| SHP401-2 | ptxP1       | Children patient | 2019 | 0-1 | Female | NA  | G | 1 | 1 | 1 | 1 | 1 | 4 | 3 | 1 | 1 | 1 | 1 | 2             | 4 | SRR27796510 |             |
| SHP404   | ptxP1       | Children patient | 2019 | 0-1 | Male   | Yes | G | 1 | 1 | 1 | 1 | 1 | 4 | 3 | 1 | 1 | 1 | 1 | 2             | 4 | SRR27796509 |             |
| SHP412   | ptxP1       | Children patient | 2019 | 0-1 | Female | NA  | G | 1 | 1 | 1 | 1 | 1 | 4 | 3 | 1 | 1 | 1 | 1 | 2             | 4 | SRR27796508 |             |
| SHP413   | ptxP1       | Children patient | 2019 | 0-1 | Male   | Yes | G | 1 | 1 | 1 | 1 | 1 | 4 | 3 | 1 | 1 | 1 | 1 | 2             | 4 | SRR27796506 |             |
| SHP414   | ptxP1       | Children patient | 2019 | 0-1 | Male   | NA  | G | 1 | 1 | 1 | 1 | 1 | 4 | 3 | 1 | 1 | 1 | 1 | 2             | 4 | SRR27796505 |             |
| SHP415   | ptxP1       | Children patient | 2019 | 0-1 | Male   | NA  | G | 1 | 1 | 1 | 1 | 1 | 4 | 3 | 1 | 1 | 1 | 1 | PRN-deficient | 2 | 4           | SRR27796504 |
| SHP427   | ptxP1       | Children patient | 2019 | 1-2 | Male   | Yes | G | 1 | 1 | 1 | 1 | 1 | 4 | 3 | 1 | 1 | 1 | 1 | 2             | 4 | SRR27796503 |             |
| SHP430   | ptxP1       | Children patient | 2019 | 0-1 | Female | NA  | G | 1 | 1 | 1 | 1 | 1 | 4 | 3 | 1 | 1 | 1 | 1 | 2             | 4 | SRR27796502 |             |
| SHP432   | ptxP1       | Children patient | 2019 | 1-2 | Male   | Yes | G | 1 | 1 | 1 | 1 | 1 | 4 | 3 | 1 | 1 | 1 | 1 | 2             | 4 | SRR27796501 |             |
| SHP433   | ptxP1       | Children patient | 2019 | 0-1 | Female | NA  | G | 1 | 1 | 1 | 1 | 1 | 4 | 3 | 1 | 1 | 1 | 1 | 2             | 4 | SRR27796500 |             |
| SHP435   | ptxP1       | Children patient | 2019 | 4-5 | Female | Yes | G | 1 | 1 | 1 | 1 | 1 | 4 | 3 | 1 | 1 | 1 | 1 | 2             | 4 | SRR27796499 |             |
| SHP438   | ptxP1       | Children patient | 2019 | 0-1 | Female | No  | G | 1 | 1 | 1 | 1 | 1 | 4 | 3 | 1 | 1 | 1 | 1 | 2             | 4 | SRR27796498 |             |
| SHP450   | ptxP1       | Children patient | 2019 | 0-1 | Female | No  | G | 1 | 1 | 1 | 1 | 1 | 4 | 3 | 1 | 1 | 1 | 1 | 2             | 4 | SRR27796497 |             |
| SHP453   | ptxP1       | Children patient | 2019 | 4-5 | Female | Yes | G | 1 | 1 | 1 | 1 | 1 | 4 | 3 | 1 | 1 | 1 | 1 | PRN-deficient | 2 | 4           | SRR27796495 |
| SHP485   | ptxP1       | Children patient | 2019 | 0-1 | Male   | No  | G | 1 | 1 | 1 | 1 | 1 | 4 | 3 | 1 | 1 | 1 | 1 | 2             | 4 | SRR27796494 |             |
| SHP5     | ptxP1       | Children patient | 2016 | 0-1 | Female | No  | G | 1 | 1 | 1 | 1 | 1 | 4 | 3 | 1 | 1 | 1 | 1 | PRN-deficient | 2 | 4           | SRR27796493 |
| SHP74    | ptxP1       | Children patient | 2017 | 0-1 | Female | No  | G | 1 | 1 | 1 | 1 | 1 | 4 | 3 | 1 | 1 | 1 | 1 | 2             | 4 | SRR27796492 |             |
| SHP75    | ptxP1       | Children patient | 2017 | 0-1 | Female | Yes | G | 1 | 1 | 1 | 1 | 1 | 4 | 3 | 1 | 1 | 1 | 1 | 2             | 4 | SRR27796491 |             |
| SHP77    | ptxP1       | Children patient | 2017 | 7-8 | Female | Yes | G | 1 | 1 | 1 | 1 | 1 | 4 | 3 | 1 | 1 | 1 | 1 | 2             | 4 | SRR27796490 |             |
| SHP85    | ptxP1       | Children patient | 2017 | 0-1 | Male   | No  | G | 1 | 1 | 1 | 1 | 1 | 4 | 3 | 1 | 1 | 1 | 1 | 2             | 4 | SRR27796489 |             |
| SHP86    | ptxP1       | Children patient | 2017 | 0-1 | Female | Yes | G | 1 | 1 | 1 | 1 | 1 | 4 | 3 | 1 | 1 | 1 | 1 | 2             | 4 | SRR27796282 |             |
| SHP87    | ptxP1       | Household        | 2017 | >20 | Female | Yes | G | 1 | 1 | 1 | 1 | 1 | 4 | 3 | 1 | 1 | 1 | 1 | 2             | 4 | SRR27796257 |             |
| SHP88    | ptxP1       | Household        | 2017 | >20 | Female | Yes | G | 1 | 1 | 1 | 1 | 1 | 4 | 3 | 1 | 1 | 1 | 1 | 2             | 4 | SRR27796255 |             |
| SHP89    | ptxP1       | Children patient | 2017 | 0-1 | Female | Yes | G | 1 | 1 | 1 | 1 | 1 | 4 | 3 | 1 | 1 | 1 | 1 | 2             | 4 | SRR27796281 |             |
| SHP90    | ptxP1       | Children patient | 2017 | 4-5 | Male   | Yes | G | 1 | 1 | 1 | 1 | 1 | 4 | 3 | 1 | 1 | 1 | 1 | 2             | 4 | SRR27796280 |             |
| SHP99-1  | ptxP1       | Children patient | 2017 | 0-1 | Male   | No  | G | 1 | 1 | 1 | 1 | 1 | 4 | 3 | 1 | 1 | 1 | 1 | 2             | 4 | SRR27796277 |             |
| SHP769   | ptxP1       | Children patient | 2023 | 7-8 | Male   | Yes | G | 1 | 1 | 1 | 1 | 1 | 4 | 3 | 1 | 1 | 1 | 1 | 2             | 4 | SRR27796276 |             |
| SH1      | ptxP3-other | Children patient | 2016 | 0-1 | Male   | No  | A | 3 | 1 | 1 | 1 | 2 | 4 | 1 | 1 | 1 | 1 | 1 | 2             | 4 | SRR27796254 |             |
| SH10     | ptxP3-other | Children patient | 2017 | 0-1 | Male   | No  | A | 3 | 1 | 1 | 1 | 2 | 4 | 1 | 1 | 1 | 1 | 1 | 2             | 4 | SRR27796249 |             |
| SH100    | ptxP3-other | Children patient | 2017 | 0-1 | Male   | Yes | A | 3 | 1 | 1 | 1 | 2 | 4 | 1 | 1 | 1 | 1 | 1 | 2             | 4 | SRR27796010 |             |
| SH102    | ptxP3-other | Children patient | 2017 | 1-2 | Female | No  | A | 3 | 1 | 1 | 1 | 2 | 4 | 1 | 1 | 1 | 1 | 1 | 2             | 4 | SRR27796009 |             |
| SH104    | ptxP3-other | Children patient | 2017 | 0-1 | Male   | No  | A | 3 | 1 | 1 | 1 | 2 | 4 | 1 | 1 | 1 | 1 | 1 | 2             | 4 | SRR27796008 |             |
| SH105    | ptxP3-other | Children patient | 2017 | 0-1 | Male   | No  | A | 3 | 1 | 1 | 1 | 2 | 4 | 1 | 1 | 1 | 1 | 1 | 2             | 4 | SRR27796006 |             |
| SH108    | ptxP3-other | Household        | 2017 | >20 | Female | Yes | A | 3 | 1 | 1 | 1 | 2 | 4 | 1 | 1 | 1 | 1 | 1 | 2             | 4 | SRR27796422 |             |



|          |             |                  |      |      |        |     |   |   |   |   |   |   |   |   |   |   |   |   |   |   |   |             |
|----------|-------------|------------------|------|------|--------|-----|---|---|---|---|---|---|---|---|---|---|---|---|---|---|---|-------------|
| SH324    | ptxP3-other | Children patient | 2018 | 0-1  | Male   | Yes | A | 3 | 1 | 1 | 2 | 1 | 4 | 1 | 1 | 1 | 1 | 1 | 2 | 2 | 4 | SRR27796227 |
| SH327    | ptxP3-other | Children patient | 2018 | 0-1  | Male   | No  | A | 3 | 1 | 1 | 2 | 1 | 4 | 1 | 1 | 1 | 1 | 1 | 2 | 2 | 4 | SRR27796226 |
| SH348    | ptxP3-other | Children patient | 2018 | 0-1  | Male   | Yes | A | 3 | 1 | 1 | 2 | 1 | 4 | 1 | 1 | 1 | 1 | 1 | 2 | 2 | 4 | SRR27796225 |
| SH35     | ptxP3-other | Children patient | 2017 | 0-1  | Female | No  | A | 3 | 1 | 1 | 2 | 1 | 4 | 1 | 1 | 1 | 1 | 1 | 2 | 2 | 4 | SRR27796025 |
| SH351    | ptxP3-other | Children patient | 2018 | 0-1  | Female | No  | A | 3 | 1 | 1 | 2 | 1 | 4 | 1 | 1 | 1 | 1 | 1 | 2 | 2 | 4 | SRR27796224 |
| SH353    | ptxP3-other | Children patient | 2018 | 0-1  | Female | No  | A | 3 | 1 | 1 | 2 | 1 | 4 | 1 | 1 | 1 | 1 | 1 | 2 | 2 | 4 | SRR27796223 |
| SH355    | ptxP3-other | Children patient | 2019 | 0-1  | Female | No  | A | 3 | 1 | 1 | 2 | 1 | 4 | 1 | 1 | 1 | 1 | 1 | 2 | 2 | 4 | SRR27796222 |
| SH359    | ptxP3-other | Children patient | 2019 | 0-1  | Male   | No  | A | 3 | 1 | 1 | 2 | 1 | 4 | 1 | 1 | 1 | 1 | 1 | 2 | 2 | 4 | SRR27796221 |
| SH36     | ptxP3-other | Children patient | 2017 | 0-1  | Female | No  | A | 3 | 1 | 1 | 2 | 1 | 4 | 1 | 1 | 1 | 1 | 1 | 2 | 2 | 4 | SRR27796024 |
| SH361    | ptxP3-other | Children patient | 2019 | 0-1  | Female | No  | A | 3 | 1 | 1 | 2 | 1 | 4 | 1 | 1 | 1 | 1 | 1 | 2 | 2 | 4 | SRR27796220 |
| SH363    | ptxP3-other | Household        | 2019 | >20  | Female | Yes | A | 3 | 1 | 1 | 2 | 1 | 4 | 1 | 1 | 1 | 1 | 1 | 2 | 2 | 4 | SRR27796419 |
| SH366    | ptxP3-other | Children patient | 2019 | 1-2  | Male   | Yes | A | 3 | 1 | 1 | 2 | 1 | 4 | 1 | 1 | 1 | 1 | 1 | 2 | 2 | 4 | SRR27796219 |
| SH369    | ptxP3-other | Children patient | 2019 | 0-1  | Male   | No  | A | 3 | 1 | 1 | 2 | 1 | 4 | 1 | 1 | 1 | 1 | 1 | 2 | 2 | 4 | SRR27796218 |
| SH374    | ptxP3-other | Children patient | 2019 | 0-1  | Female | NA  | A | 3 | 1 | 1 | 2 | 1 | 4 | 1 | 1 | 1 | 1 | 1 | 2 | 2 | 4 | SRR27796216 |
| SH39     | ptxP3-other | Children patient | 2017 | 0-1  | Female | Yes | A | 3 | 1 | 1 | 2 | 1 | 4 | 1 | 1 | 1 | 1 | 1 | 2 | 2 | 4 | SRR27796023 |
| SH4      | ptxP3-other | Children patient | 2016 | 0-1  | Male   | No  | A | 3 | 1 | 1 | 2 | 1 | 4 | 1 | 1 | 1 | 1 | 1 | 2 | 2 | 4 | SRR27796251 |
| SH406    | ptxP3-other | Children patient | 2019 | 0-1  | Male   | No  | A | 3 | 1 | 1 | 2 | 1 | 4 | 1 | 1 | 1 | 1 | 1 | 2 | 2 | 4 | SRR27796215 |
| SH41     | ptxP3-other | Children patient | 2017 | 0-1  | Female | No  | A | 3 | 1 | 1 | 2 | 1 | 4 | 1 | 1 | 1 | 1 | 1 | 2 | 2 | 4 | SRR27796022 |
| SH416    | ptxP3-other | Children patient | 2019 | 0-1  | Male   | No  | A | 3 | 1 | 1 | 2 | 1 | 4 | 1 | 1 | 1 | 1 | 1 | 2 | 2 | 4 | SRR27796214 |
| SH419    | ptxP3-other | Children patient | 2019 | 0-1  | Male   | NA  | A | 3 | 1 | 1 | 2 | 1 | 4 | 1 | 1 | 1 | 1 | 1 | 2 | 2 | 4 | SRR27796213 |
| SH42     | ptxP3-other | Children patient | 2017 | 0-1  | Female | No  | A | 3 | 1 | 1 | 2 | 1 | 4 | 1 | 1 | 1 | 1 | 1 | 2 | 2 | 4 | SRR27796021 |
| SH420    | ptxP3-other | Children patient | 2019 | 0-1  | Male   | No  | A | 3 | 1 | 1 | 2 | 1 | 4 | 1 | 1 | 1 | 1 | 1 | 2 | 2 | 4 | SRR27796212 |
| SH421    | ptxP3-other | Children patient | 2019 | 0-1  | Male   | NA  | A | 3 | 1 | 1 | 2 | 1 | 4 | 1 | 1 | 1 | 1 | 1 | 2 | 2 | 4 | SRR27796211 |
| SH422    | ptxP3-other | Children patient | 2019 | 0-1  | Female | No  | A | 3 | 1 | 1 | 2 | 1 | 4 | 1 | 1 | 1 | 1 | 1 | 2 | 2 | 4 | SRR27795994 |
| SH424    | ptxP3-other | Children patient | 2019 | 0-1  | Male   | NA  | A | 3 | 1 | 1 | 2 | 1 | 4 | 1 | 1 | 1 | 1 | 1 | 2 | 2 | 4 | SRR27795993 |
| SH428    | ptxP3-other | Children patient | 2019 | 4-5  | Female | Yes | A | 3 | 1 | 1 | 2 | 1 | 4 | 1 | 1 | 1 | 1 | 1 | 2 | 2 | 4 | SRR27795992 |
| SH434    | ptxP3-other | Children patient | 2019 | 0-1  | Female | No  | A | 3 | 1 | 1 | 2 | 1 | 4 | 1 | 1 | 1 | 1 | 1 | 2 | 2 | 4 | SRR27795991 |
| SH442    | ptxP3-other | Children patient | 2019 | 0-1  | Male   | No  | A | 3 | 1 | 1 | 2 | 1 | 4 | 1 | 1 | 1 | 1 | 1 | 2 | 2 | 4 | SRR27795989 |
| SH443    | ptxP3-other | Children patient | 2019 | 1-2  | Female | Yes | A | 3 | 1 | 1 | 2 | 1 | 4 | 1 | 1 | 1 | 1 | 1 | 2 | 2 | 4 | SRR27795988 |
| SH45     | ptxP3-other | Children patient | 2017 | 0-1  | Female | No  | A | 3 | 1 | 1 | 2 | 1 | 4 | 1 | 1 | 1 | 1 | 1 | 2 | 2 | 4 | SRR27796020 |
| SH470    | ptxP3-other | Children patient | 2019 | 0-1  | Female | Yes | A | 3 | 1 | 1 | 2 | 1 | 4 | 1 | 1 | 1 | 1 | 1 | 2 | 2 | 4 | SRR27795987 |
| SH473    | ptxP3-other | Children patient | 2019 | 0-1  | Female | Yes | A | 3 | 1 | 1 | 2 | 1 | 4 | 1 | 1 | 1 | 1 | 1 | 2 | 2 | 4 | SRR27795986 |
| SH474    | ptxP3-other | Children patient | 2019 | 0-1  | Female | No  | A | 3 | 1 | 1 | 2 | 1 | 4 | 1 | 1 | 1 | 1 | 1 | 2 | 2 | 4 | SRR27795985 |
| SH475    | ptxP3-other | Children patient | 2019 | 0-1  | Male   | No  | A | 3 | 1 | 1 | 2 | 1 | 4 | 1 | 1 | 1 | 1 | 1 | 2 | 2 | 4 | SRR27795984 |
| SH476    | ptxP3-other | Children patient | 2019 | 0-1  | Female | No  | A | 3 | 1 | 1 | 2 | 1 | 4 | 1 | 1 | 1 | 1 | 1 | 2 | 2 | 4 | SRR27795983 |
| SH477    | ptxP3-other | Children patient | 2019 | 0-1  | Male   | No  | A | 3 | 1 | 1 | 2 | 1 | 4 | 1 | 1 | 1 | 1 | 1 | 2 | 2 | 4 | SRR27795982 |
| SH491    | ptxP3-other | Children patient | 2019 | 0-1  | Male   | Yes | A | 3 | 1 | 1 | 2 | 1 | 4 | 1 | 1 | 1 | 1 | 1 | 2 | 2 | 4 | SRR27795980 |
| SH50     | ptxP3-other | Children patient | 2017 | 0-1  | Male   | Yes | A | 3 | 1 | 1 | 2 | 1 | 4 | 1 | 1 | 1 | 1 | 1 | 2 | 2 | 4 | SRR27796019 |
| SH502    | ptxP3-other | Children patient | 2019 | 0-1  | Male   | No  | A | 3 | 1 | 1 | 2 | 1 | 4 | 1 | 1 | 1 | 1 | 1 | 2 | 2 | 4 | SRR27796618 |
| SH507    | ptxP3-other | Children patient | 2019 | 0-1  | Female | No  | A | 3 | 1 | 1 | 2 | 1 | 4 | 1 | 1 | 1 | 1 | 1 | 2 | 2 | 4 | SRR27796616 |
| SH51     | ptxP3-other | Children patient | 2017 | 0-1  | Male   | No  | A | 3 | 1 | 1 | 2 | 1 | 4 | 1 | 1 | 1 | 1 | 1 | 2 | 2 | 4 | SRR27796017 |
| SH519    | ptxP3-other | Children patient | 2019 | 0-1  | Male   | No  | A | 3 | 1 | 1 | 2 | 1 | 4 | 1 | 1 | 1 | 1 | 1 | 2 | 2 | 4 | SRR27796615 |
| SH526    | ptxP3-other | Children patient | 2020 | 0-1  | Male   | No  | A | 3 | 1 | 1 | 2 | 1 | 4 | 1 | 1 | 1 | 1 | 1 | 2 | 2 | 4 | SRR27796614 |
| SH528    | ptxP3-other | Children patient | 2021 | 5-6  | Male   | Yes | A | 3 | 1 | 1 | 2 | 1 | 4 | 1 | 1 | 1 | 1 | 1 | 2 | 2 | 4 | SRR27796613 |
| SH53     | ptxP3-other | Children patient | 2017 | 0-1  | Female | Yes | A | 3 | 1 | 1 | 2 | 1 | 4 | 1 | 1 | 1 | 1 | 1 | 2 | 2 | 4 | SRR27796016 |
| SH533    | ptxP3-other | Children patient | 2021 | 6-7  | Male   | Yes | A | 3 | 1 | 1 | 2 | 1 | 4 | 1 | 1 | 1 | 1 | 1 | 2 | 2 | 4 | SRR27796612 |
| SH54     | ptxP3-other | Children patient | 2017 | 0-1  | Male   | No  | A | 3 | 1 | 1 | 2 | 1 | 4 | 1 | 1 | 1 | 1 | 1 | 2 | 2 | 4 | SRR27796015 |
| SH543    | ptxP3-other | Children patient | 2021 | 0-1  | Female | NA  | A | 3 | 1 | 1 | 2 | 1 | 4 | 1 | 1 | 1 | 1 | 1 | 2 | 2 | 4 | SRR27796611 |
| SH544    | ptxP3-other | Children patient | 2021 | 6-7  | Male   | Yes | A | 3 | 1 | 1 | 2 | 1 | 4 | 1 | 1 | 1 | 1 | 1 | 2 | 2 | 4 | SRR27796610 |
| SH584    | ptxP3-other | Children patient | 2021 | 0-1  | Male   | NA  | A | 3 | 1 | 1 | 2 | 1 | 4 | 1 | 1 | 1 | 1 | 1 | 2 | 2 | 4 | SRR27796609 |
| SH64     | ptxP3-other | Children patient | 2017 | 0-1  | Male   | No  | A | 3 | 1 | 1 | 2 | 1 | 4 | 1 | 1 | 1 | 1 | 1 | 2 | 2 | 4 | SRR27796014 |
| SH642    | ptxP3-other | Children patient | 2022 | 8-9  | Female | Yes | A | 3 | 1 | 1 | 2 | 1 | 4 | 1 | 1 | 1 | 1 | 1 | 2 | 2 | 4 | SRR27796608 |
| SH653    | ptxP3-other | Children patient | 2022 | 2-3  | Female | Yes | A | 3 | 1 | 1 | 2 | 1 | 4 | 1 | 1 | 1 | 1 | 1 | 2 | 2 | 4 | SRR27796607 |
| SH667    | ptxP3-other | Children patient | 2022 | 6-7  | Male   | Yes | A | 3 | 1 | 1 | 2 | 1 | 4 | 1 | 1 | 1 | 1 | 1 | 2 | 2 | 4 | SRR27796605 |
| SH675    | ptxP3-other | Children patient | 2022 | 8-9  | Female | Yes | A | 3 | 1 | 1 | 2 | 1 | 4 | 1 | 1 | 1 | 1 | 1 | 2 | 2 | 4 | SRR27796604 |
| SH680    | ptxP3-other | Children patient | 2022 | 0-1  | Female | NA  | A | 3 | 1 | 1 | 2 | 1 | 4 | 1 | 1 | 1 | 1 | 1 | 2 | 2 | 4 | SRR27796603 |
| SH686    | ptxP3-other | Children patient | 2022 | 2-3  | Female | Yes | A | 3 | 1 | 1 | 2 | 1 | 4 | 1 | 1 | 1 | 1 | 1 | 2 | 2 | 4 | SRR27796602 |
| SH691    | ptxP3-other | Household        | 2022 | >20  | Female | Yes | A | 3 | 1 | 1 | 2 | 1 | 4 | 1 | 1 | 1 | 1 | 1 | 2 | 2 | 4 | SRR27796601 |
| SH72     | ptxP3-other | Children patient | 2017 | 0-1  | Male   | Yes | A | 3 | 1 | 1 | 2 | 1 | 4 | 1 | 1 | 1 | 1 | 1 | 2 | 2 | 4 | SRR27796013 |
| SH8      | ptxP3-other | Children patient | 2016 | 0-1  | Male   | No  | A | 3 | 1 | 1 | 2 | 1 | 4 | 1 | 1 | 1 | 1 | 1 | 2 | 2 | 4 | SRR27796250 |
| SH81     | ptxP3-other | Children patient | 2017 | 0-1  | Female | No  | A | 3 | 1 | 1 | 2 | 1 | 4 | 1 | 1 | 1 | 1 | 1 | 2 | 2 | 4 | SRR27796012 |
| SH95     | ptxP3-other | Children patient | 2017 | 0-1  | Male   | Yes | A | 3 | 1 | 1 | 2 | 1 | 4 | 1 | 1 | 1 | 1 | 1 | 2 | 2 | 4 | SRR27796011 |
| SHBP1111 | ptxP3-other | Children patient | 2024 | 7-10 | Male   | Yes | A | 3 | 1 | 1 | 2 | 1 | 4 | 1 | 1 | 1 | 1 | 1 | 2 | 2 | 4 | SRR28622157 |
| SHBP144  | ptxP3-other | Children patient | 2017 | 0-1  | Female | NA  | A | 3 | 1 | 1 | 2 | 1 | 4 | 1 | 1 | 1 | 1 | 1 | 2 | 2 | 4 | SRR27796601 |
| SHBP150  | ptxP3-other | Household        | 2017 | >20  | Female | Yes | A | 3 | 1 | 1 | 2 | 1 | 4 | 1 | 1 | 1 | 1 | 1 | 2 | 2 | 4 | SRR27796210 |
| SHBP206  | ptxP3-other | Children patient | 2018 | 0-1  | Male   | No  | A | 3 | 1 | 1 | 2 | 1 | 4 | 1 | 1 | 1 | 1 | 1 | 2 | 2 | 4 | SRR27796600 |
| SHBP207  | ptxP3-other | Children patient | 2018 | 0-1  | Female | No  | A | 3 | 1 | 1 | 2 | 1 | 4 | 1 | 1 | 1 | 1 | 1 | 2 | 2 | 4 | SRR27796599 |
| SHBP208  | ptxP3-other | Children patient | 2018 | 0-1  | Male   | NA  | A | 3 | 1 | 1 | 2 | 1 | 4 | 1 | 1 | 1 | 1 | 1 | 2 | 2 | 4 | SRR27796598 |
| SHBP210  | ptxP3-other | Children patient | 2018 | 0-1  | Female | No  | A | 3 | 1 | 1 | 2 | 1 | 4 | 1 | 1 | 1 | 1 | 1 | 2 | 2 | 4 | SRR27796597 |

|           |             |                  |      |     |        |     |   |   |   |   |   |   |   |   |   |   |   |   |   |   |             |
|-----------|-------------|------------------|------|-----|--------|-----|---|---|---|---|---|---|---|---|---|---|---|---|---|---|-------------|
| SHBP223   | ptxP3-other | Household        | 2018 | >20 | Female | Yes | A | 3 | 1 | 1 | 2 | 1 | 4 | 1 | 1 | 1 | 1 | 2 | 2 | 4 | SRR27796209 |
| SHBP289   | ptxP3-other | Children patient | 2018 | 0-1 | Female | No  | A | 3 | 1 | 1 | 2 | 1 | 4 | 1 | 1 | 1 | 1 | 2 | 2 | 4 | SRR27796452 |
| SHBP328   | ptxP3-other | Children patient | 2018 | 0-1 | Male   | NA  | A | 3 | 1 | 1 | 2 | 1 | 4 | 1 | 1 | 1 | 1 | 2 | 2 | 4 | SRR27796450 |
| SHBP330   | ptxP3-other | Children patient | 2018 | 0-1 | Female | No  | A | 3 | 1 | 1 | 2 | 1 | 4 | 1 | 1 | 1 | 1 | 2 | 2 | 4 | SRR27796449 |
| SHBP333   | ptxP3-other | Children patient | 2018 | 0-1 | Female | No  | A | 3 | 1 | 1 | 2 | 1 | 4 | 1 | 1 | 1 | 1 | 2 | 2 | 4 | SRR27796448 |
| SHBP334   | ptxP3-other | Children patient | 2018 | 0-1 | Female | NA  | A | 3 | 1 | 1 | 2 | 1 | 4 | 1 | 1 | 1 | 1 | 2 | 2 | 4 | SRR27796447 |
| SHBP335   | ptxP3-other | Children patient | 2018 | 0-1 | Male   | No  | A | 3 | 1 | 1 | 2 | 1 | 4 | 1 | 1 | 1 | 1 | 2 | 2 | 4 | SRR27796446 |
| SHBP336   | ptxP3-other | Children patient | 2018 | 0-1 | Male   | No  | A | 3 | 1 | 1 | 2 | 1 | 4 | 1 | 1 | 1 | 1 | 2 | 2 | 4 | SRR27796445 |
| SHBP339   | ptxP3-other | Children patient | 2018 | 0-1 | Male   | No  | A | 3 | 1 | 1 | 2 | 1 | 4 | 1 | 1 | 1 | 1 | 2 | 2 | 4 | SRR27796444 |
| SHBP343   | ptxP3-other | Children patient | 2018 | 0-1 | Female | NA  | A | 3 | 1 | 1 | 2 | 1 | 4 | 1 | 1 | 1 | 1 | 2 | 2 | 4 | SRR27796443 |
| SHBP347-1 | ptxP3-other | Children patient | 2018 | 0-1 | Male   | No  | A | 3 | 1 | 1 | 2 | 1 | 4 | 1 | 1 | 1 | 1 | 2 | 2 | 4 | SRR27796442 |
| SHBP347-2 | ptxP3-other | Children patient | 2018 | 0-1 | Male   | No  | A | 3 | 1 | 1 | 2 | 1 | 4 | 1 | 1 | 1 | 1 | 2 | 2 | 4 | SRR27796441 |
| SHBP380   | ptxP3-other | Children patient | 2019 | 0-1 | Male   | NA  | A | 3 | 1 | 1 | 2 | 1 | 4 | 1 | 1 | 1 | 1 | 2 | 2 | 4 | SRR27796439 |
| SHBP381   | ptxP3-other | Children patient | 2019 | 0-1 | Female | No  | A | 3 | 1 | 1 | 2 | 1 | 4 | 1 | 1 | 1 | 1 | 2 | 2 | 4 | SRR27796438 |
| SHBP382   | ptxP3-other | Children patient | 2019 | 1-2 | Female | Yes | A | 3 | 1 | 1 | 2 | 1 | 4 | 1 | 1 | 1 | 1 | 2 | 2 | 4 | SRR27796437 |
| SHBP384   | ptxP3-other | Children patient | 2019 | 0-1 | Male   | Yes | A | 3 | 1 | 1 | 2 | 1 | 4 | 1 | 1 | 1 | 1 | 2 | 2 | 4 | SRR27796436 |
| SHBP386   | ptxP3-other | Children patient | 2019 | 0-1 | Female | NA  | A | 3 | 1 | 1 | 2 | 1 | 4 | 1 | 1 | 1 | 1 | 2 | 2 | 4 | SRR27796435 |
| SHBP391   | ptxP3-other | Children patient | 2019 | 0-1 | Male   | NA  | A | 3 | 1 | 1 | 2 | 1 | 4 | 1 | 1 | 1 | 1 | 2 | 2 | 4 | SRR27796434 |
| SHBP392   | ptxP3-other | Children patient | 2019 | 5-6 | Female | Yes | A | 3 | 1 | 1 | 2 | 1 | 4 | 1 | 1 | 1 | 1 | 2 | 2 | 4 | SRR27796433 |
| SHBP396   | ptxP3-other | Children patient | 2019 | 0-1 | Male   | No  | A | 3 | 1 | 1 | 2 | 1 | 4 | 1 | 1 | 1 | 1 | 2 | 2 | 4 | SRR27796432 |
| SHBP398   | ptxP3-other | Children patient | 2019 | 0-1 | Male   | No  | A | 3 | 1 | 1 | 2 | 1 | 4 | 1 | 1 | 1 | 1 | 2 | 2 | 4 | SRR27796431 |
| SHBP399   | ptxP3-other | Children patient | 2019 | 0-1 | Female | No  | A | 3 | 1 | 1 | 2 | 1 | 4 | 1 | 1 | 1 | 1 | 2 | 2 | 4 | SRR27796430 |
| SHBP402   | ptxP3-other | Children patient | 2019 | 0-1 | Female | No  | A | 3 | 1 | 1 | 2 | 1 | 4 | 1 | 1 | 1 | 1 | 2 | 2 | 4 | SRR27796428 |
| SHBP403   | ptxP3-other | Children patient | 2019 | 0-1 | Male   | NA  | A | 3 | 1 | 1 | 2 | 1 | 4 | 1 | 1 | 1 | 1 | 2 | 2 | 4 | SRR27796427 |
| SHBP431   | ptxP3-other | Children patient | 2019 | 0-1 | Male   | NA  | A | 3 | 1 | 1 | 2 | 1 | 4 | 1 | 1 | 1 | 1 | 2 | 2 | 4 | SRR27796426 |
| SHBP456   | ptxP3-other | Children patient | 2019 | 0-1 | Male   | No  | A | 3 | 1 | 1 | 2 | 1 | 4 | 1 | 1 | 1 | 1 | 2 | 2 | 4 | SRR27796425 |
| SHBP462   | ptxP3-other | Children patient | 2019 | 0-1 | Female | NA  | A | 3 | 1 | 1 | 2 | 1 | 4 | 1 | 1 | 1 | 1 | 2 | 2 | 4 | SRR27796424 |

**Supplementary table 2: Metadata and sequencing information of Beijing and Guangdong strains.**

| StrainID | Geographical regions       | Lineage       | Year | Accession number |
|----------|----------------------------|---------------|------|------------------|
| BJ179    | Beijing, China             | ptxP3-MR-MT28 | 2019 | SRR27796588      |
| BJ179-2  | Beijing, China             | ptxP3-other   | 2019 | SRR27796587      |
| BJ202    | Beijing, China             | ptxP1         | 2019 | SRR27796585      |
| BJ209B   | Beijing, China             | ptxP3-MR-MT28 | 2022 | SRR27796584      |
| BJ209N   | Beijing, China             | ptxP3-MR-MT28 | 2022 | SRR27796583      |
| BJ280    | Beijing, China             | ptxP1         | 2019 | SRR27796582      |
| BJ285    | Beijing, China             | ptxP3-MR-MT28 | 2019 | SRR27796581      |
| BJ296    | Beijing, China             | ptxP3-MR-MT28 | 2020 | SRR27796580      |
| SZ51     | Shenzhen, Guangdong, China | ptxP3-MR-MT28 | 2023 | SRR27796579      |
| SZ52     | Shenzhen, Guangdong, China | ptxP3-other   | 2023 | SRR27796578      |
| SZ53     | Shenzhen, Guangdong, China | ptxP3-MR-MT28 | 2023 | SRR27796577      |

**Supplementary table 3: Publicly available genome sequences used in this study.**

| Biosample    | Accession       | Strain      | Year | Country |
|--------------|-----------------|-------------|------|---------|
| SAMD00046894 | GCA_001598615.1 | NBRC_107857 | NA   | NA      |
| SAMD00156475 | SRR8372356      | BP376       | 2011 | Japan   |
| SAMD00156476 | SRR8372355      | BP377       | 2011 | Japan   |
| SAMD00156477 | SRR8372354      | BP379       | 2011 | Japan   |
| SAMD00156478 | SRR8372353      | BP404       | 2011 | Japan   |
| SAMD00156479 | SRR8372347      | BP409       | 2012 | Japan   |
| SAMD00156480 | SRR8372344      | BP413       | 2012 | Japan   |
| SAMD00156481 | SRR8372315      | BP414       | 2012 | Japan   |
| SAMD00156482 | SRR8372314      | BP420       | 2012 | Japan   |
| SAMD00156483 | SRR8372346      | BP430       | 2011 | Japan   |
| SAMD00156486 | SRR8372350      | BP542       | 2016 | Japan   |
| SAMD00156487 | SRR8372349      | BP545       | 2016 | Japan   |
| SAMD00156488 | SRR8372352      | BP551       | 2015 | Japan   |
| SAMD00156489 | SRR8372351      | BP556       | 2016 | Japan   |
| SAMD00156490 | SRR8372327      | BP563       | 2016 | Japan   |
| SAMD00156491 | SRR8372326      | BP575       | 2016 | Japan   |
| SAMD00156492 | SRR8372313      | BP576       | 2016 | Japan   |
| SAMD00156493 | SRR8372310      | BP577       | 2017 | Japan   |
| SAMD00156494 | SRR8372309      | BP580       | 2015 | Japan   |
| SAMD00194230 | DRR209174       | missing     | 2005 | Japan   |
| SAMD00194231 | DRR445791       | missing     | 2011 | Japan   |
| SAMD00328185 | DRR300241       | BP369       | 2010 | Japan   |
| SAMD00328186 | DRR300242       | BP370       | 2010 | Japan   |
| SAMD00328187 | DRR300243       | BP372       | 2010 | Japan   |
| SAMD00328188 | DRR300244       | BP373       | 2010 | Japan   |
| SAMD00328189 | DRR300245       | BP374       | 2010 | Japan   |
| SAMD00328190 | DRR300246       | BP375       | 2010 | Japan   |
| SAMD00328191 | SRR14288288     | BP380       | 2011 | Japan   |
| SAMD00328192 | SRR14288312     | BP381       | 2011 | Japan   |
| SAMD00328193 | SRR14288301     | BP382       | 2011 | Japan   |
| SAMD00328194 | SRR14288292     | BP383       | 2011 | Japan   |
| SAMD00328195 | DRR300251       | BP384       | 2011 | Japan   |
| SAMD00328196 | DRR300252       | BP385       | 2011 | Japan   |
| SAMD00328197 | DRR300253       | BP386       | 2011 | Japan   |
| SAMD00328198 | DRR300254       | BP387       | 2011 | Japan   |
| SAMD00328199 | DRR300255       | BP423       | 2012 | Japan   |
| SAMD00328200 | DRR300256       | BP424       | 2012 | Japan   |
| SAMD00328201 | DRR300257       | BP425       | 2012 | Japan   |
| SAMD00328202 | DRR300258       | BP426       | 2012 | Japan   |
| SAMD00328203 | DRR300259       | BP427       | 2012 | Japan   |

|              |                 |       |      |              |
|--------------|-----------------|-------|------|--------------|
| SAMD00328204 | DRR300260       | BP428 | 2012 | Japan        |
| SAMD00328205 | DRR300261       | BP429 | 2012 | Japan        |
| SAMD00328206 | DRR300262       | BP546 | 2016 | Japan        |
| SAMD00328207 | DRR300263       | BP547 | 2016 | Japan        |
| SAMD00328208 | DRR300264       | BP548 | 2016 | Japan        |
| SAMD00328209 | DRR300265       | BP552 | 2015 | Japan        |
| SAMD00328210 | DRR300266       | BP553 | 2016 | Japan        |
| SAMD00328211 | DRR300267       | BP554 | 2016 | Japan        |
| SAMD00328212 | DRR300268       | BP557 | 2016 | Japan        |
| SAMD00328213 | DRR300269       | BP558 | 2016 | Japan        |
| SAMD00328214 | DRR300270       | BP559 | 2016 | Japan        |
| SAMD00328215 | DRR300271       | BP560 | 2016 | Japan        |
| SAMD00328216 | DRR300272       | BP564 | 2016 | Japan        |
| SAMD00328217 | DRR300273       | BP565 | 2016 | Japan        |
| SAMD00328218 | DRR300274       | BP566 | 2016 | Japan        |
| SAMD00328219 | DRR300275       | BP567 | 2016 | Japan        |
| SAMD00328220 | DRR300276       | BP569 | 2016 | Japan        |
| SAMD00328221 | DRR300277       | BP570 | 2016 | Japan        |
| SAMD00328222 | DRR300278       | BP571 | 2016 | Japan        |
| SAMD00328223 | DRR300279       | BP573 | 2016 | Japan        |
| SAMD00328224 | DRR300280       | BP574 | 2016 | Japan        |
| SAMD00328225 | ERR6044068      | BP586 | 2018 | Japan        |
| SAMD00328226 | ERR6044069      | BP587 | 2018 | Japan        |
| SAMD00328227 | ERR6044070      | BP588 | 2018 | Japan        |
| SAMD00328228 | ERR6044071      | BP589 | 2018 | Japan        |
| SAMD00328237 | GCA_019974435.1 |       | 2018 | Japan        |
| SAMD00439490 | DRR374966       | 10015 | 2011 | China_Taiwan |
| SAMD00439491 | DRR374967       | 10120 | 2012 | China_Taiwan |
| SAMD00490894 | DRR374968       | BP389 | 2011 | Japan        |
| SAMD00490895 | DRR374969       | BP391 | 2011 | Japan        |
| SAMD00490896 | DRR374970       | BP392 | 2011 | Japan        |
| SAMD00490897 | DRR374971       | BP415 | 2012 | Japan        |
| SAMD00490898 | ERR8052263      | BP434 | 2012 | Japan        |
| SAMD00490899 | ERR8052264      | BP435 | 2012 | Japan        |
| SAMD00549575 | DRR413408       | BP625 | 2018 | Japan        |
| SAMD00549619 | DRR413409       | BP509 | 2015 | Japan        |
| SAMD00549620 | DRR413410       | BP510 | 2015 | Japan        |
| SAMD00549621 | DRR413411       | BP511 | 2015 | Japan        |
| SAMD00549622 | DRR413412       | BP512 | 2015 | Japan        |
| SAMD00549623 | DRR413413       | BP531 | 2015 | Japan        |
| SAMD00549624 | DRR413414       | BP533 | 2015 | Japan        |
| SAMD00549625 | DRR413415       | BP534 | 2015 | Japan        |
| SAMD00549626 | DRR413416       | BP535 | 2015 | Japan        |

|               |             |       |      |          |
|---------------|-------------|-------|------|----------|
| SAMD00549627  | DRR413417   | BP536 | 2015 | Japan    |
| SAMD00549628  | DRR413418   | BP537 | 2015 | Japan    |
| SAMD00549629  | DRR413419   | BP543 | 2016 | Japan    |
| SAMD00549630  | DRR413420   | BP544 | 2016 | Japan    |
| SAMD00549631  | DRR413421   | BP550 | 2016 | Japan    |
| SAMD00549632  | DRR413422   | BP562 | 2016 | Japan    |
| SAMD00549633  | DRR413423   | BP572 | 2016 | Japan    |
| SAMD00549634  | DRR413424   | BP585 | 2017 | Japan    |
| SAMD00549635  | DRR413425   | BP590 | 2018 | Japan    |
| SAMD00549636  | DRR428468   | BP591 | 2018 | Japan    |
| SAMD00549637  | DRR428469   | BP599 | 2018 | Japan    |
| SAMD00570792  | DRR428470   | NA    | 2000 | Japan    |
| SAMD00570793  | DRR428471   | NA    | 2004 | Japan    |
| SAMD00570795  | DRR428473   | NA    | 2011 | Japan    |
| SAMD00570796  | DRR428474   | NA    | 2011 | Japan    |
| SAMD00570797  | DRR428475   | NA    | 2009 | Japan    |
| SAMD00570798  | DRR428476   | NA    | 2009 | Japan    |
| SAMD00570799  | DRR428477   | NA    | 2008 | Japan    |
| SAMD00570800  | DRR428478   | NA    | 2008 | Japan    |
| SAMD00570801  | DRR428479   | NA    | 2013 | Japan    |
| SAMD00570802  | DRR428480   | NA    | 2013 | Japan    |
| SAMD00570803  | DRR428481   | NA    | 2014 | Japan    |
| SAMD00570804  | DRR428482   | NA    | 2014 | Japan    |
| SAMD00570805  | DRR428483   | NA    | 2014 | Japan    |
| SAMD00570806  | DRR428484   | NA    | 2019 | Japan    |
| SAMD00570807  | DRR428485   | NA    | 2019 | Japan    |
| SAMD00570808  | DRR428486   | NA    | 2019 | Japan    |
| SAMD00570809  | DRR428487   | NA    | 2019 | Japan    |
| SAMD00570810  | DRR428488   | NA    | 2019 | Japan    |
| SAMD00570811  | DRR428489   | NA    | 2019 | Japan    |
| SAMD00570812  | DRR428490   | NA    | 2019 | Japan    |
| SAMD00570813  | DRR428491   | NA    | 2020 | Japan    |
| SAMD00570814  | DRR428492   | NA    | 2020 | Japan    |
| SAMD00571254  | DRR428493   | NA    | 2019 | Viet_Nam |
| SAMD00571255  | DRR428494   | NA    | 2019 | Viet_Nam |
| SAMD00571256  | DRR428495   | NA    | 2020 | Viet_Nam |
| SAMD00571257  | DRR428496   | NA    | 2020 | Viet_Nam |
| SAMD00571258  | SRR19028466 | NA    | 2020 | Viet_Nam |
| SAMD00571259  | SRR19028465 | NA    | 2020 | Viet_Nam |
| SAMEA10057864 | ERR6722664  | NA    | 1996 | Norway   |
| SAMEA10057865 | ERR6722665  | NA    | 1996 | Norway   |
| SAMEA10057866 | ERR6722666  | NA    | 1996 | Norway   |
| SAMEA10057867 | ERR6722667  | NA    | 1996 | Norway   |



|               |            |    |      |        |
|---------------|------------|----|------|--------|
| SAMEA10057868 | ERR6722668 | NA | 1996 | Norway |
| SAMEA10057869 | ERR6722669 | NA | 1996 | Norway |
| SAMEA10057870 | ERR6722670 | NA | 1996 | Norway |
| SAMEA10057871 | ERR6722671 | NA | 1996 | Norway |
| SAMEA10057872 | ERR6722672 | NA | 1997 | Norway |
| SAMEA10057873 | ERR6722673 | NA | 1997 | Norway |
| SAMEA10057874 | ERR6722674 | NA | 1997 | Norway |
| SAMEA10057875 | ERR6722675 | NA | 1997 | Norway |
| SAMEA10057876 | ERR6722676 | NA | 1997 | Norway |
| SAMEA10057877 | ERR6722677 | NA | 1997 | Norway |
| SAMEA10057878 | ERR6722678 | NA | 1997 | Norway |
| SAMEA10057879 | ERR6722679 | NA | 1997 | Norway |
| SAMEA10057880 | ERR6722680 | NA | 1997 | Norway |
| SAMEA10057881 | ERR6722681 | NA | 1997 | Norway |
| SAMEA10057882 | ERR6722682 | NA | 1997 | Norway |
| SAMEA10057883 | ERR6722683 | NA | 1997 | Norway |
| SAMEA10057884 | ERR6722684 | NA | 1997 | Norway |
| SAMEA10057885 | ERR6722685 | NA | 1997 | Norway |
| SAMEA10057886 | ERR6722686 | NA | 1998 | Norway |
| SAMEA10057887 | ERR6722687 | NA | 1998 | Norway |
| SAMEA10057888 | ERR6722688 | NA | 1998 | Norway |
| SAMEA10057889 | ERR6722689 | NA | 1998 | Norway |
| SAMEA10057890 | ERR6722690 | NA | 1998 | Norway |
| SAMEA10057891 | ERR6722691 | NA | 1998 | Norway |
| SAMEA10057892 | ERR6044083 | NA | 1998 | Norway |
| SAMEA10057893 | ERR6044085 | NA | 1998 | Norway |
| SAMEA10057894 | ERR6044122 | NA | 1998 | Norway |
| SAMEA10057895 | ERR6044124 | NA | 1998 | Norway |
| SAMEA10057896 | ERR6722696 | NA | 1999 | Norway |
| SAMEA10057897 | ERR6722697 | NA | 1999 | Norway |
| SAMEA10057898 | ERR6722698 | NA | 1999 | Norway |
| SAMEA10057899 | ERR6722699 | NA | 1999 | Norway |
| SAMEA10057900 | ERR6722700 | NA | 1999 | Norway |
| SAMEA10057901 | ERR6722701 | NA | 1999 | Norway |
| SAMEA10057902 | ERR6722702 | NA | 1999 | Norway |
| SAMEA10057903 | ERR6722703 | NA | 1999 | Norway |
| SAMEA10057905 | ERR6722705 | NA | 2000 | Norway |
| SAMEA10057906 | ERR6722706 | NA | 2000 | Norway |
| SAMEA10057907 | ERR6722707 | NA | 2000 | Norway |
| SAMEA10057908 | ERR6722708 | NA | 2000 | Norway |
| SAMEA10057909 | ERR6722709 | NA | 2000 | Norway |
| SAMEA10057910 | ERR6722710 | NA | 2000 | Norway |
| SAMEA10057911 | ERR6722711 | NA | 2001 | Norway |

|               |            |    |      |        |
|---------------|------------|----|------|--------|
| SAMEA10057912 | ERR6722712 | NA | 2001 | Norway |
| SAMEA10057913 | ERR6722713 | NA | 2001 | Norway |
| SAMEA10057914 | ERR6722714 | NA | 2001 | Norway |
| SAMEA10057915 | ERR6722715 | NA | 2001 | Norway |
| SAMEA10057916 | ERR6722716 | NA | 2001 | Norway |
| SAMEA10057917 | ERR6722717 | NA | 2001 | Norway |
| SAMEA10057919 | ERR6722718 | NA | 2002 | Norway |
| SAMEA10057920 | ERR6722719 | NA | 2002 | Norway |
| SAMEA10057921 | ERR6722720 | NA | 2002 | Norway |
| SAMEA10057922 | ERR6722721 | NA | 2002 | Norway |
| SAMEA10057923 | ERR6722722 | NA | 2002 | Norway |
| SAMEA10057924 | ERR6722723 | NA | 2002 | Norway |
| SAMEA10057925 | ERR6722724 | NA | 2002 | Norway |
| SAMEA10057926 | ERR6722725 | NA | 2003 | Norway |
| SAMEA10057927 | ERR6722726 | NA | 2003 | Norway |
| SAMEA10057929 | ERR6722728 | NA | 2003 | Norway |
| SAMEA10057930 | ERR6722729 | NA | 2003 | Norway |
| SAMEA10057931 | ERR6722730 | NA | 2003 | Norway |
| SAMEA10057932 | ERR6722731 | NA | 2003 | Norway |
| SAMEA10057933 | ERR6722732 | NA | 2003 | Norway |
| SAMEA10057934 | ERR6722733 | NA | 2003 | Norway |
| SAMEA10057935 | ERR6722734 | NA | 2004 | Norway |
| SAMEA10057936 | ERR6722735 | NA | 2004 | Norway |
| SAMEA10057937 | ERR6722736 | NA | 2004 | Norway |
| SAMEA10057938 | ERR6722737 | NA | 2004 | Norway |
| SAMEA10057939 | ERR6722738 | NA | 2004 | Norway |
| SAMEA10057940 | ERR6722739 | NA | 2004 | Norway |
| SAMEA10057941 | ERR6722740 | NA | 2004 | Norway |
| SAMEA10057942 | ERR6722741 | NA | 2004 | Norway |
| SAMEA10057943 | ERR6722742 | NA | 2005 | Norway |
| SAMEA10057944 | ERR6722743 | NA | 2005 | Norway |
| SAMEA10057945 | ERR6722744 | NA | 2005 | Norway |
| SAMEA10057946 | ERR6722745 | NA | 2005 | Norway |
| SAMEA10057947 | ERR6722746 | NA | 2005 | Norway |
| SAMEA10057948 | ERR6722747 | NA | 2005 | Norway |
| SAMEA10057949 | ERR6722748 | NA | 2005 | Norway |
| SAMEA10057950 | ERR6722749 | NA | 2005 | Norway |
| SAMEA10057951 | ERR6722750 | NA | 2005 | Norway |
| SAMEA10057952 | ERR6722751 | NA | 2005 | Norway |
| SAMEA10057953 | DRR300236  | NA | 2006 | Norway |
| SAMEA10057954 | ERR6722660 | NA | 2006 | Norway |
| SAMEA10057955 | ERR6722661 | NA | 2006 | Norway |
| SAMEA10057956 | ERR6722662 | NA | 2006 | Norway |

|               |            |    |      |        |
|---------------|------------|----|------|--------|
| SAMEA10057957 | ERR6722756 | NA | 2006 | Norway |
| SAMEA10057958 | ERR6722757 | NA | 2006 | Norway |
| SAMEA10057959 | ERR6722758 | NA | 2006 | Norway |
| SAMEA10057960 | ERR6722759 | NA | 2006 | Norway |
| SAMEA10057961 | ERR6722760 | NA | 2006 | Norway |
| SAMEA10057962 | ERR6722761 | NA | 2007 | Norway |
| SAMEA10057963 | ERR6722762 | NA | 2007 | Norway |
| SAMEA10057964 | ERR6722763 | NA | 2007 | Norway |
| SAMEA10057965 | ERR6722764 | NA | 2007 | Norway |
| SAMEA10057966 | ERR6722765 | NA | 2007 | Norway |
| SAMEA10057967 | ERR6722766 | NA | 2007 | Norway |
| SAMEA10057968 | ERR6722767 | NA | 2007 | Norway |
| SAMEA10057969 | ERR6722768 | NA | 2007 | Norway |
| SAMEA10057970 | ERR6722769 | NA | 2008 | Norway |
| SAMEA10057971 | ERR6722770 | NA | 2008 | Norway |
| SAMEA10057972 | ERR6722771 | NA | 2008 | Norway |
| SAMEA10057973 | ERR6722772 | NA | 2008 | Norway |
| SAMEA10057974 | ERR6722773 | NA | 2008 | Norway |
| SAMEA10057975 | ERR6722774 | NA | 2009 | Norway |
| SAMEA10057976 | ERR6722775 | NA | 2009 | Norway |
| SAMEA10057977 | ERR6722776 | NA | 2009 | Norway |
| SAMEA10057978 | ERR6722777 | NA | 2009 | Norway |
| SAMEA10057979 | ERR6722778 | NA | 2009 | Norway |
| SAMEA10057980 | ERR6722779 | NA | 2009 | Norway |
| SAMEA10057981 | ERR6722780 | NA | 2009 | Norway |
| SAMEA10057982 | ERR6722781 | NA | 2009 | Norway |
| SAMEA10057983 | ERR6722782 | NA | 2009 | Norway |
| SAMEA10057984 | ERR6722783 | NA | 2009 | Norway |
| SAMEA10057985 | ERR6722784 | NA | 2012 | Norway |
| SAMEA10057986 | ERR6722785 | NA | 2012 | Norway |
| SAMEA10057987 | ERR6722786 | NA | 2012 | Norway |
| SAMEA10057988 | ERR6722787 | NA | 2012 | Norway |
| SAMEA10057989 | ERR6722788 | NA | 2012 | Norway |
| SAMEA10057990 | ERR6722789 | NA | 2013 | Norway |
| SAMEA10057991 | ERR6722790 | NA | 2013 | Norway |
| SAMEA10057992 | ERR6722791 | NA | 2013 | Norway |
| SAMEA10057993 | ERR6722792 | NA | 2013 | Norway |
| SAMEA10057994 | ERR6722793 | NA | 2013 | Norway |
| SAMEA10057996 | ERR6722795 | NA | 2013 | Norway |
| SAMEA10058000 | ERR6722799 | NA | 2014 | Norway |
| SAMEA10058001 | ERR6722800 | NA | 2014 | Norway |
| SAMEA10058003 | ERR6722802 | NA | 2015 | Norway |
| SAMEA10058004 | ERR6722803 | NA | 2015 | Norway |

|                |            |    |      |        |
|----------------|------------|----|------|--------|
| SAMEA10058005  | ERR6722804 | NA | 2015 | Norway |
| SAMEA10058006  | ERR6722805 | NA | 2015 | Norway |
| SAMEA10058007  | ERR6722806 | NA | 2015 | Norway |
| SAMEA10058008  | ERR6722807 | NA | 2015 | Norway |
| SAMEA10058009  | ERR6722808 | NA | 2015 | Norway |
| SAMEA10058010  | ERR6722809 | NA | 2015 | Norway |
| SAMEA10058011  | ERR6722810 | NA | 2016 | Norway |
| SAMEA10058012  | ERR6722811 | NA | 2016 | Norway |
| SAMEA10058013  | ERR6722692 | NA | 2016 | Norway |
| SAMEA10058014  | ERR6722693 | NA | 2016 | Norway |
| SAMEA10058015  | ERR6722694 | NA | 2016 | Norway |
| SAMEA10058016  | ERR6722695 | NA | 2016 | Norway |
| SAMEA10058017  | ERR6722816 | NA | 2016 | Norway |
| SAMEA10058018  | ERR6722817 | NA | 2016 | Norway |
| SAMEA10058019  | ERR6722818 | NA | 2016 | Norway |
| SAMEA10058020  | ERR6722819 | NA | 2017 | Norway |
| SAMEA10058021  | ERR6722820 | NA | 2017 | Norway |
| SAMEA10058022  | ERR6722821 | NA | 2017 | Norway |
| SAMEA10058023  | ERR6722822 | NA | 2017 | Norway |
| SAMEA10058024  | ERR6722823 | NA | 2017 | Norway |
| SAMEA10058025  | ERR6722824 | NA | 2017 | Norway |
| SAMEA10058026  | ERR6722825 | NA | 2017 | Norway |
| SAMEA10058027  | ERR6722826 | NA | 2017 | Norway |
| SAMEA10058028  | ERR6722827 | NA | 2018 | Norway |
| SAMEA10058029  | ERR6722828 | NA | 2018 | Norway |
| SAMEA10058030  | ERR6722829 | NA | 2018 | Norway |
| SAMEA10058031  | ERR6722830 | NA | 2018 | Norway |
| SAMEA10058032  | ERR6722831 | NA | 2018 | Norway |
| SAMEA10058033  | ERR6722832 | NA | 2018 | Norway |
| SAMEA10058034  | ERR6722833 | NA | 2018 | Norway |
| SAMEA10058035  | ERR6722834 | NA | 2019 | Norway |
| SAMEA10058036  | ERR6722835 | NA | 2019 | Norway |
| SAMEA10058037  | ERR6722836 | NA | 2019 | Norway |
| SAMEA10058038  | ERR6722837 | NA | 2019 | Norway |
| SAMEA10058039  | ERR6722838 | NA | 2019 | Norway |
| SAMEA10058040  | ERR6722839 | NA | 2019 | Norway |
| SAMEA10058041  | ERR6722752 | NA | 2019 | Norway |
| SAMEA10058042  | ERR6722753 | NA | 2019 | Norway |
| SAMEA10058043  | ERR6722754 | NA | 2019 | Norway |
| SAMEA10058044  | ERR6722755 | NA | 2019 | Norway |
| SAMEA104210812 | ERR1775279 | NA | 2008 | France |
| SAMEA104210813 | ERR1775280 | NA | 2008 | France |
| SAMEA104210814 | ERR1775281 | NA | 2008 | France |

|                |            |    |      |        |
|----------------|------------|----|------|--------|
| SAMEA104210815 | ERR1775282 | NA | 2008 | France |
| SAMEA104210816 | ERR1775283 | NA | 2008 | France |
| SAMEA104210817 | ERR1775284 | NA | 2008 | France |
| SAMEA104210818 | ERR1775285 | NA | 2008 | France |
| SAMEA104210819 | ERR1775286 | NA | 2008 | France |
| SAMEA104210820 | ERR1775287 | NA | 2008 | France |
| SAMEA104210821 | ERR1775288 | NA | 2008 | France |
| SAMEA104210822 | ERR1775289 | NA | 2008 | France |
| SAMEA104210823 | ERR1775290 | NA | 2008 | France |
| SAMEA104210824 | ERR1775291 | NA | 2008 | France |
| SAMEA104210825 | ERR1775292 | NA | 2008 | France |
| SAMEA104210826 | ERR1775293 | NA | 2009 | France |
| SAMEA104210827 | ERR1775294 | NA | 2009 | France |
| SAMEA104210828 | ERR1775295 | NA | 2009 | France |
| SAMEA104210829 | ERR1775296 | NA | 2009 | France |
| SAMEA104210830 | ERR1775297 | NA | 2009 | France |
| SAMEA104210831 | ERR1775298 | NA | 2011 | France |
| SAMEA104210832 | ERR1775299 | NA | 2011 | France |
| SAMEA104210833 | ERR1775300 | NA | 2011 | France |
| SAMEA104210834 | ERR1775301 | NA | 2013 | France |
| SAMEA104210835 | ERR1775302 | NA | 2013 | France |
| SAMEA104210836 | ERR1775303 | NA | 2014 | France |
| SAMEA104210837 | ERR1775304 | NA | 2014 | France |
| SAMEA104210838 | ERR1775305 | NA | 2014 | France |
| SAMEA104210839 | ERR1775306 | NA | 2014 | France |
| SAMEA104210840 | ERR1775307 | NA | 2014 | France |
| SAMEA104210841 | ERR1775188 | NA | 2014 | France |
| SAMEA104210842 | ERR1775189 | NA | 2014 | France |
| SAMEA104210843 | ERR1775190 | NA | 2014 | France |
| SAMEA104210844 | ERR1775191 | NA | 2014 | France |
| SAMEA104210845 | ERR1775192 | NA | 2014 | France |
| SAMEA104210846 | ERR1775193 | NA | 2014 | France |
| SAMEA104210847 | ERR1775194 | NA | 2014 | France |
| SAMEA104210848 | ERR2102132 | NA | 2014 | France |
| SAMEA104210849 | ERR2102133 | NA | 2014 | France |
| SAMEA104210850 | ERR2102134 | NA | 2014 | France |
| SAMEA104210851 | ERR2102135 | NA | 2014 | France |
| SAMEA104210852 | ERR2102136 | NA | 2014 | France |
| SAMEA104210853 | ERR2102137 | NA | 2014 | France |
| SAMEA104210854 | ERR2102138 | NA | 2015 | France |
| SAMEA104210855 | ERR2102139 | NA | 2015 | France |
| SAMEA104210856 | ERR2102140 | NA | 2015 | France |
| SAMEA104210857 | ERR2102141 | NA | 2015 | France |

|                |                 |          |      |                |
|----------------|-----------------|----------|------|----------------|
| SAMEA104210858 | ERR2102142      | NA       | 2015 | France         |
| SAMEA104210859 | ERR2102143      | NA       | 2015 | France         |
| SAMEA104210860 | ERR2102144      | NA       | 2015 | France         |
| SAMEA104210862 | ERR2102109      | NA       | 2015 | France         |
| SAMEA104210863 | ERR1775308      | NA       | 2015 | France         |
| SAMEA104210864 | ERR1775309      | NA       | 2015 | France         |
| SAMEA104210865 | ERR1775310      | NA       | 2015 | France         |
| SAMEA104210866 | ERR1775195      | NA       | 1954 | Japan          |
| SAMEA104338396 | ERR1775196      | NCTC8189 | NA   | NA             |
| SAMEA1062145   | GCA_900327875.1 | VS67     | 1954 | Czech_Republic |
| SAMEA1062146   | GCA_900327835.1 | VS366    | 1954 | Czech_Republic |
| SAMEA1062147   | GCA_900327845.1 | VS393    | 1954 | Czech_Republic |
| SAMEA1062148   | GCA_900327855.1 | VS377    | 1954 | Czech_Republic |
| SAMEA1062149   | GCA_900327865.1 | VS401    | 1954 | Czech_Republic |
| SAMEA111397203 | ERR11766918     | NA       | NA   | NA             |
| SAMEA111397206 | ERR11766926     | NA       | NA   | NA             |
| SAMEA111397220 | ERR11766968     | NA       | NA   | NA             |
| SAMEA111397224 | ERR11766974     | NA       | NA   | NA             |
| SAMEA111397233 | ERR11766982     | NA       | NA   | NA             |
| SAMEA111397321 | ERR11767217     | NA       | NA   | NA             |
| SAMEA111397350 | ERR11767288     | NA       | NA   | NA             |
| SAMEA111397354 | ERR11767300     | NA       | NA   | NA             |
| SAMEA111397397 | ERR11767176     | NA       | NA   | NA             |
| SAMEA111397401 | ERR11767192     | NA       | NA   | NA             |
| SAMEA111397408 | ERR11767301     | NA       | NA   | NA             |
| SAMEA111397409 | ERR11767289     | NA       | NA   | NA             |
| SAMEA111397411 | ERR11767258     | NA       | NA   | NA             |
| SAMEA111397415 | ERR11767273     | NA       | NA   | NA             |
| SAMEA111397422 | ERR11767190     | NA       | NA   | NA             |
| SAMEA111397426 | ERR11767205     | NA       | NA   | NA             |
| SAMEA111397433 | ERR11767216     | NA       | NA   | NA             |
| SAMEA111397435 | ERR11767226     | NA       | NA   | NA             |
| SAMEA111397450 | ERR11767206     | NA       | NA   | NA             |
| SAMEA111397454 | ERR11767228     | NA       | NA   | NA             |
| SAMEA111397459 | ERR11767244     | NA       | NA   | NA             |
| SAMEA111397463 | ERR11767339     | NA       | NA   | NA             |
| SAMEA111397465 | ERR11767349     | NA       | NA   | NA             |
| SAMEA12219263  | ERR8052265      | NA       | 2009 | France         |
| SAMEA12219264  | ERR8052266      | NA       | 2011 | France         |
| SAMEA12219265  | ERR8052267      | NA       | 2011 | France         |
| SAMEA12219266  | ERR6097518      | NA       | 2019 | France         |
| SAMEA12219267  | ERR6097519      | NA       | 2019 | France         |
| SAMEA1705933   | NC_002929.2     | Tohama I | NA   | Japan          |

|               |                 |           |      |                |
|---------------|-----------------|-----------|------|----------------|
| SAMEA1931344  | GCA_001330995.1 | B162      | 1950 | Netherlands    |
| SAMEA1931348  | GCA_001331055.1 | B220      | 1963 | Poland         |
| SAMEA1931507  | GCA_001201635.1 | B019      | 1978 | Australia      |
| SAMEA1931536  | GCA_001206335.1 | B068      | 1957 | China          |
| SAMEA1931537  | GCA_001211225.1 | B315      | 1986 | USA            |
| SAMEA1931748  | GCA_001331155.1 | B152      | 1975 | Kenya          |
| SAMEA1931800  | GCA_001199115.1 | B338      | 2003 | USA            |
| SAMEA1931868  | GCA_001208185.1 | B156      | 1975 | Kenya          |
| SAMEA1931871  | GCA_001331215.1 | B143      | 1975 | Kenya          |
| SAMEA1933004  | GCA_001195625.1 | B160      | 1949 | Netherlands    |
| SAMEA1933007  | GCA_001331255.1 | B155      | 1975 | Kenya          |
| SAMEA1970817  | GCA_001331275.1 | B159      | 1975 | Kenya          |
| SAMEA2015292  | GCA_001200435.1 | B340      | 2004 | USA            |
| SAMEA2031986  | GCA_001331355.1 | B147      | 1975 | Kenya          |
| SAMEA2035349  | GCA_001205275.1 | B178      | 1982 | Netherlands    |
| SAMEA2272749  | GCA_000306945.1 | 18323     | NA   | NA             |
| SAMEA3178014  | GCA_900445965.1 | NCTC10907 | 1964 | United_Kingdom |
| SAMEA3178015  | GCA_901472525.1 | NCTC13251 | NA   | NA             |
| SAMEA3354379  | GCA_001013565.1 | D420      | NA   | NA             |
| SAMEA3470206  | ERR1775197      | NCTC10739 | NA   | NA             |
| SAMEA3643328  | GCA_900187345.1 | NCTC13667 | 2012 | United_Kingdom |
| SAMEA3672884  | GCA_900445885.1 | NCTC13668 | 2012 | United_Kingdom |
| SAMEA3871515  | GCA_900067265.1 | Bpst24    | NA   | NA             |
| SAMEA3905388  | GCA_900445805.1 | NCTC10911 | NA   | NA             |
| SAMEA3923583  | GCA_900445825.1 | NCTC10902 | 1950 | United_Kingdom |
| SAMEA3923584  | GCA_900445865.1 | NCTC10905 | NA   | Denmark        |
| SAMEA3923585  | GCA_900445935.1 | NCTC10908 | NA   | Denmark        |
| SAMEA3923586  | GCA_900475665.1 | NCTC10910 | 1967 | United_Kingdom |
| SAMEA3936801  | GCA_900186845.1 | NCTC13666 | 2012 | United_Kingdom |
| SAMEA41185918 | SRR5829746      | BP1       | 2000 | Japan          |
| SAMEA41189668 | SRR5829768      | BP104     | 1999 | Japan          |
| SAMEA41190418 | SRR5829770      | BP106     | 2000 | Japan          |
| SAMEA41191168 | SRR5829773      | BP107     | 2000 | Japan          |
| SAMEA41191918 | SRR5829778      | BP108     | 2000 | Japan          |
| SAMEA41192668 | SRR5829767      | BP111     | 2000 | Japan          |
| SAMEA41193418 | SRR5829738      | BP112     | 2000 | Japan          |
| SAMEA41194168 | SRR5829763      | BP113     | 2000 | Japan          |
| SAMEA41194918 | SRR5829783      | BP114     | 1999 | Japan          |
| SAMEA41195668 | SRR5829786      | BP115     | 2000 | Japan          |
| SAMEA41196418 | SRR5829784      | BP116     | 2000 | Japan          |
| SAMEA41197168 | SRR5829774      | BP117     | 1999 | Japan          |
| SAMEA41197918 | SRR5829748      | BP118     | 1997 | Japan          |
| SAMEA41198668 | SRR5829754      | BP119     | 2001 | Japan          |

|               |            |       |      |       |
|---------------|------------|-------|------|-------|
| SAMEA41199418 | SRR5829741 | BP12  | 1990 | Japan |
| SAMEA41200168 | SRR5829828 | BP120 | 1995 | Japan |
| SAMEA41200918 | SRR5829805 | BP121 | 1998 | Japan |
| SAMEA41201668 | SRR5829831 | BP122 | 2001 | Japan |
| SAMEA41202418 | SRR5829823 | BP123 | 2000 | Japan |
| SAMEA41203168 | SRR5829804 | BP124 | 1996 | Japan |
| SAMEA41203918 | SRR5829795 | BP125 | 1996 | Japan |
| SAMEA41204668 | SRR5829824 | BP127 | 1996 | Japan |
| SAMEA41205418 | SRR5829840 | BP128 | 1996 | Japan |
| SAMEA41206168 | SRR5829810 | BP130 | 1996 | Japan |
| SAMEA41206918 | SRR5829796 | BP131 | 1996 | Japan |
| SAMEA41207668 | SRR5829835 | BP133 | 1996 | Japan |
| SAMEA41208418 | SRR5829829 | BP134 | 2000 | Japan |
| SAMEA41209168 | SRR5829803 | BP135 | 2000 | Japan |
| SAMEA41209918 | SRR5829808 | BP139 | 2001 | Japan |
| SAMEA41210668 | SRR5829838 | BP148 | 2002 | Japan |
| SAMEA41212918 | SRR5829812 | BP156 | 2002 | Japan |
| SAMEA41213668 | SRR5829841 | BP159 | 2002 | Japan |
| SAMEA41214418 | SRR5829827 | BP162 | 2002 | Japan |
| SAMEA41215168 | SRR5829802 | BP193 | 1995 | Japan |
| SAMEA41215918 | SRR5829815 | BP194 | 1986 | Japan |
| SAMEA41216668 | SRR5829833 | BP196 | 1986 | Japan |
| SAMEA41217418 | SRR5829813 | BP202 | 2003 | Japan |
| SAMEA41218168 | SRR5829820 | BP211 | 2003 | Japan |
| SAMEA41218918 | SRR5829837 | BP214 | 2003 | Japan |
| SAMEA41219668 | SRR5829821 | BP215 | 2003 | Japan |
| SAMEA41220418 | SRR5829839 | BP22  | 1991 | Japan |
| SAMEA41221168 | SRR5829797 | BP227 | 2003 | Japan |
| SAMEA41221918 | SRR5829819 | BP233 | 2004 | Japan |
| SAMEA41222668 | SRR5829799 | BP235 | 2004 | Japan |
| SAMEA41223418 | SRR5829832 | BP243 | 2004 | Japan |
| SAMEA41224168 | SRR5829800 | BP260 | 2004 | Japan |
| SAMEA41224918 | SRR5829844 | BP267 | 2004 | Japan |
| SAMEA41225668 | SRR5829806 | BP27  | 1992 | Japan |
| SAMEA41226418 | ERR1775163 | BP28  | 1992 | Japan |
| SAMEA41227168 | ERR1775164 | BP29  | 1992 | Japan |
| SAMEA41227918 | ERR1775165 | BP290 | 2005 | Japan |
| SAMEA41228668 | ERR1775166 | BP293 | 2005 | Japan |
| SAMEA41229418 | ERR1775167 | BP297 | 2005 | Japan |
| SAMEA41230168 | ERR1775168 | BP300 | 2005 | Japan |
| SAMEA41230918 | ERR1775169 | BP302 | 2005 | Japan |
| SAMEA41231668 | ERR1775170 | BP306 | 2006 | Japan |
| SAMEA41232418 | ERR1775171 | BP307 | 2006 | Japan |



|               |            |       |      |       |
|---------------|------------|-------|------|-------|
| SAMEA41233168 | ERR1775172 | BP31  | 1999 | Japan |
| SAMEA41233918 | ERR1775173 | BP310 | 2006 | Japan |
| SAMEA41234668 | ERR1775174 | BP311 | 2006 | Japan |
| SAMEA41235418 | ERR1775175 | BP313 | 2006 | Japan |
| SAMEA41236168 | ERR1775176 | BP314 | 2007 | Japan |
| SAMEA41236918 | ERR1775177 | BP316 | 2007 | Japan |
| SAMEA41237668 | ERR1775178 | BP32  | 1995 | Japan |
| SAMEA41238418 | ERR1775179 | BP327 | 2007 | Japan |
| SAMEA41239168 | ERR1775180 | BP33  | 1994 | Japan |
| SAMEA41239918 | ERR1775181 | BP330 | 2007 | Japan |
| SAMEA41240668 | ERR1775182 | BP338 | 2008 | Japan |
| SAMEA41241418 | ERR1775183 | BP34  | 1994 | Japan |
| SAMEA41242168 | ERR1775184 | BP341 | 2008 | Japan |
| SAMEA41242918 | ERR1775185 | BP343 | 2007 | Japan |
| SAMEA41243668 | ERR1775186 | BP344 | 2008 | Japan |
| SAMEA41244418 | ERR1775187 | BP346 | 2009 | Japan |
| SAMEA41245168 | SRR5858785 | BP347 | 2009 | Japan |
| SAMEA41245918 | SRR5858782 | BP348 | 2009 | Japan |
| SAMEA41246668 | SRR5858783 | BP349 | 2009 | Japan |
| SAMEA41247418 | SRR5858784 | BP35  | 1994 | Japan |
| SAMEA41248168 | SRR5829775 | BP350 | 2009 | Japan |
| SAMEA41248918 | SRR5829740 | BP351 | 2009 | Japan |
| SAMEA41249668 | SRR5829739 | BP36  | 1994 | Japan |
| SAMEA41250418 | SRR5829756 | BP361 | 2010 | Japan |
| SAMEA41251168 | SRR5829779 | BP364 | 2010 | Japan |
| SAMEA41251918 | SRR5829737 | BP367 | 2010 | Japan |
| SAMEA41252668 | SRR5829755 | BP37  | 1994 | Japan |
| SAMEA41253418 | SRR5829785 | BP371 | 2010 | Japan |
| SAMEA41254168 | SRR5829749 | BP379 | 2011 | Japan |
| SAMEA41254918 | SRR5829769 | BP390 | 2011 | Japan |
| SAMEA41255668 | SRR5829759 | BP399 | 2011 | Japan |
| SAMEA41256418 | SRR5829753 | BP40  | 1994 | Japan |
| SAMEA41257168 | SRR5829742 | BP404 | 2011 | Japan |
| SAMEA41257918 | SRR5829780 | BP409 | 2012 | Japan |
| SAMEA41258668 | SRR5829764 | BP41  | 1994 | Japan |
| SAMEA41260168 | SRR5829776 | BP413 | 2012 | Japan |
| SAMEA41260918 | SRR5829757 | BP414 | 2012 | Japan |
| SAMEA41261668 | SRR5829758 | BP42  | 1997 | Japan |
| SAMEA41262418 | SRR5829772 | BP43  | 2000 | Japan |
| SAMEA41263168 | SRR5829782 | BP44  | 1982 | Japan |
| SAMEA41263918 | SRR5829766 | BP451 | 2011 | Japan |
| SAMEA41264668 | SRR5829777 | BP454 | 2012 | Japan |
| SAMEA41265418 | SRR5829761 | BP462 | 2010 | Japan |

|               |            |          |      |       |
|---------------|------------|----------|------|-------|
| SAMEA41266168 | SRR5829750 | BP473    | 2013 | Japan |
| SAMEA41266918 | SRR5829751 | BP474    | 2013 | Japan |
| SAMEA41267668 | SRR5829743 | BP479    | 2013 | Japan |
| SAMEA41268418 | SRR5829762 | BP481    | 2013 | Japan |
| SAMEA41269168 | SRR5829765 | BP482    | 2013 | Japan |
| SAMEA41269918 | SRR5829752 | BP484    | 2014 | Japan |
| SAMEA41270668 | SRR5829781 | BP486    | 2014 | Japan |
| SAMEA41271418 | ERR1775217 | BP490    | 2014 | Japan |
| SAMEA41272168 | ERR1775218 | BP5      | 1995 | Japan |
| SAMEA41272918 | ERR1775219 | BP502    | 2014 | Japan |
| SAMEA41273668 | ERR1775220 | BP504    | 2014 | Japan |
| SAMEA41274418 | ERR1775221 | BP55     | 2000 | Japan |
| SAMEA41275168 | ERR1775222 | BP56     | 1999 | Japan |
| SAMEA41275918 | ERR1775223 | BP58     | 1999 | Japan |
| SAMEA41276668 | ERR1775224 | BP59     | 2000 | Japan |
| SAMEA41277418 | ERR1775225 | BP6      | 1995 | Japan |
| SAMEA41278168 | ERR1775226 | BP60     | 2000 | Japan |
| SAMEA41278918 | ERR1775227 | BP61     | 2000 | Japan |
| SAMEA41279668 | ERR1775228 | BP63     | 2000 | Japan |
| SAMEA41280418 | ERR1775229 | BP64     | 2000 | Japan |
| SAMEA41281168 | ERR1775230 | BP66     | 1999 | Japan |
| SAMEA41281918 | ERR1775231 | BP67     | 2000 | Japan |
| SAMEA41282668 | ERR1775232 | BP68     | 1989 | Japan |
| SAMEA41283418 | ERR1775233 | BP71     | 1988 | Japan |
| SAMEA41284168 | ERR1775234 | BP73     | 1988 | Japan |
| SAMEA41284918 | ERR1775235 | BP8      | 1996 | Japan |
| SAMEA41285668 | ERR1775236 | BP81     | 1990 | Japan |
| SAMEA41286418 | ERR1775237 | BP84     | 1990 | Japan |
| SAMEA41287168 | ERR1775238 | BP85     | 1991 | Japan |
| SAMEA41287918 | ERR1775239 | BP86     | 1996 | Japan |
| SAMEA41288668 | ERR1775240 | BP89     | 1982 | Japan |
| SAMEA41289418 | ERR1775241 | BP9      | 1996 | Japan |
| SAMEA41290168 | ERR1775242 | BP90     | 1983 | Japan |
| SAMEA41290918 | ERR1775243 | BP91     | 1986 | Japan |
| SAMEA41291668 | ERR1775244 | BP92     | 1986 | Japan |
| SAMEA41292418 | ERR1775245 | BP93     | 1987 | Japan |
| SAMEA41293168 | ERR1775246 | BP94     | 1987 | Japan |
| SAMEA41293918 | ERR1775247 | BP95     | 1983 | Japan |
| SAMEA41294668 | ERR1775134 | BP96     | 1983 | Japan |
| SAMEA41295418 | ERR1775135 | BP97     | 1983 | Japan |
| SAMEA41296168 | ERR1775136 | BP98     | 1983 | Japan |
| SAMEA41296918 | ERR1775137 | BP99     | 1983 | Japan |
| SAMEA41297668 | ERR1775138 | KonanBP1 | 2008 | Japan |

|               |                 |           |      |                |
|---------------|-----------------|-----------|------|----------------|
| SAMEA41298418 | ERR1775139      | KonanBP10 | 2008 | Japan          |
| SAMEA41299168 | ERR1775140      | KonanBP11 | 2008 | Japan          |
| SAMEA41299918 | ERR1775141      | KonanBP2  | 2008 | Japan          |
| SAMEA41300668 | ERR1775142      | KonanBP3  | 2008 | Japan          |
| SAMEA41301418 | ERR1775143      | KonanBP4  | 2008 | Japan          |
| SAMEA41302168 | ERR1775144      | KonanBP5  | 2008 | Japan          |
| SAMEA41302918 | ERR1775145      | KonanBP6  | 2008 | Japan          |
| SAMEA41303668 | ERR1775146      | KonanBP7  | 2008 | Japan          |
| SAMEA41304418 | ERR1775147      | KonanBP8  | 2008 | Japan          |
| SAMEA41305168 | ERR1775148      | KonanBP9  | 2008 | Japan          |
| SAMEA41305918 | ERR1775149      | KonanBP12 | 2009 | Japan          |
| SAMEA41306668 | ERR1775150      | KonanBP13 | 2009 | Japan          |
| SAMEA41307418 | ERR1775151      | KonanBP14 | 2009 | Japan          |
| SAMEA41308168 | ERR1775152      | KonanBP15 | 2009 | Japan          |
| SAMEA41308918 | ERR1775153      | KonanBP16 | 2009 | Japan          |
| SAMEA41309668 | ERR1775154      | KonanBP17 | 2009 | Japan          |
| SAMEA41310418 | ERR1775155      | KonanBP18 | 2010 | Japan          |
| SAMEA41311168 | ERR1775156      | KonanBP19 | 2010 | Japan          |
| SAMEA41311918 | ERR1775157      | KonanBP20 | 2011 | Japan          |
| SAMEA41312668 | ERR1775158      | KonanBP21 | 2011 | Japan          |
| SAMEA41313418 | ERR1775159      | KonanBP22 | 2011 | Japan          |
| SAMEA41314168 | ERR1775160      | KonanBP23 | 2011 | Japan          |
| SAMEA41314918 | ERR1775161      | KonanBP24 | 2011 | Japan          |
| SAMEA41315668 | ERR1775162      | KonanBP25 | 2011 | Japan          |
| SAMEA41316418 | ERR1775198      | KonanBP26 | 2011 | Japan          |
| SAMEA41317168 | ERR1775199      | KonanBP27 | 2011 | Japan          |
| SAMEA41317918 | ERR1775200      | KonanBP28 | 2011 | Japan          |
| SAMEA41318668 | ERR1775201      | KonanBP29 | 2011 | Japan          |
| SAMEA41319418 | ERR1775202      | KonanBP30 | 2011 | Japan          |
| SAMEA41320168 | ERR1775203      | KonanBP31 | 2011 | Japan          |
| SAMEA41320918 | ERR1775204      | KonanBP32 | 2012 | Japan          |
| SAMEA41321668 | ERR1775205      | KonanBP33 | 2012 | Japan          |
| SAMEA41322418 | ERR1775206      | KonanBP34 | 2012 | Japan          |
| SAMEA41323168 | ERR1775207      | KonanBP35 | 2012 | Japan          |
| SAMEA41323918 | ERR1775208      | KonanBP36 | 2012 | Japan          |
| SAMEA41324668 | ERR1775209      | KonanBP37 | 2013 | Japan          |
| SAMEA41325418 | ERR1775210      | KonanBP38 | 2013 | Japan          |
| SAMEA41326168 | ERR1775211      | KonanBP39 | 2013 | Japan          |
| SAMEA4525294  | SRR5070736      | NCTC13668 | NA   | NA             |
| SAMEA4693567  | GCA_900465145.1 | BP46      | 2014 | Czech_Republic |
| SAMEA4693568  | GCA_900465165.1 | BP82      | 2014 | Czech_Republic |
| SAMEA4693569  | GCA_900465175.1 | BP155     | 2008 | Czech_Republic |
| SAMEA4693570  | GCA_900465795.1 | BP312     | 2008 | Czech_Republic |

|              |                 |        |      |                |
|--------------|-----------------|--------|------|----------------|
| SAMEA4693571 | GCA_900465925.1 | BP318  | 2015 | Czech_Republic |
| SAMEA4693572 | GCA_900465785.1 | BP6242 | 2012 | Czech_Republic |
| SAMEA4693573 | GCA_900465735.1 | BP6260 | 2012 | Czech_Republic |
| SAMEA4693574 | GCA_900465715.1 | BP6384 | 2012 | Czech_Republic |
| SAMEA4693575 | GCA_900465745.1 | BPK10  | 2012 | Czech_Republic |
| SAMEA4752842 | ERR1775311      | NA     | 2014 | Tunisia        |
| SAMEA4752843 | ERR1775312      | NA     | 2014 | Tunisia        |
| SAMEA4752844 | ERR1775313      | NA     | 2014 | Tunisia        |
| SAMEA4752845 | ERR1775314      | NA     | 2014 | Tunisia        |
| SAMEA4752846 | ERR1775315      | NA     | 2014 | Tunisia        |
| SAMEA4752847 | ERR1775316      | NA     | 2014 | Tunisia        |
| SAMEA4752848 | ERR1775317      | NA     | 2014 | Tunisia        |
| SAMEA4752849 | ERR1775318      | NA     | 2014 | Tunisia        |
| SAMEA4752850 | ERR1775319      | NA     | 2014 | Tunisia        |
| SAMEA4752851 | ERR1775320      | NA     | 2014 | Tunisia        |
| SAMEA751125  | SRR5070961      | B003   | 2000 | Argentina      |
| SAMEA751126  | SRR5070964      | B142   | 2007 | Japan          |
| SAMEA751127  | SRR5070962      | B141   | 2006 | Japan          |
| SAMEA751128  | SRR5070911      | B092   | 2006 | Finland        |
| SAMEA751129  | SRR5070936      | B005   | 2001 | Argentina      |
| SAMEA751130  | SRR5070947      | B004   | 2000 | Argentina      |
| SAMEA751131  | SRR5070963      | B002   | 2000 | Argentina      |
| SAMEA751132  | SRR5070926      | B091   | 2004 | Finland        |
| SAMEA751133  | SRR5070945      | B094   | 2006 | Finland        |
| SAMEA751134  | SRR5070849      | B012   | 2008 | Argentina      |
| SAMEA751135  | SRR5070950      | NA     | NA   | NA             |
| SAMEA751137  | SRR5070951      | B111   | 1994 | Italy          |
| SAMEA751138  | SRR5070929      | B121   | 1994 | Italy          |
| SAMEA751139  | SRR5070940      | B123   | 1994 | Italy          |
| SAMEA751140  | SRR5070943      | B117   | 1994 | Italy          |
| SAMEA751141  | SRR5070934      | B124   | 1995 | Italy          |
| SAMEA751142  | SRR5070921      | B115   | 1994 | Italy          |
| SAMEA751143  | SRR5070880      | B080   | 1964 | Finland        |
| SAMEA751144  | SRR5070874      | B079   | 1953 | Finland        |
| SAMEA751145  | SRR5070851      | B082   | 1977 | Finland        |
| SAMEA751146  | SRR5070722      | B065   | 2004 | Canada         |
| SAMEA751147  | SRR5070899      | B084   | 1991 | Finland        |
| SAMEA751148  | SRR5070889      | B083   | 1982 | Finland        |
| SAMEA751149  | SRR5070901      | B086   | 1996 | Finland        |
| SAMEA751150  | SRR5070884      | B085   | 1994 | Finland        |
| SAMEA751151  | SRR5070854      | B088   | 2002 | Finland        |
| SAMEA751152  | SRR5070866      | B087   | 1999 | Finland        |
| SAMEA751153  | SRR5070743      | B061   | 2001 | Canada         |

|             |                 |      |      |              |
|-------------|-----------------|------|------|--------------|
| SAMEA751154 | SRR5070748      | B051 | 1994 | Canada       |
| SAMEA751155 | SRR5070799      | B038 | 2000 | Australia    |
| SAMEA751156 | SRR5070954      | B072 | 1974 | Denmark      |
| SAMEA751157 | SRR5070930      | B073 | 2001 | Denmark      |
| SAMEA751158 | SRR5070908      | B074 | 2001 | Denmark      |
| SAMEA751159 | SRR5070931      | B075 | 2001 | Denmark      |
| SAMEA751160 | SRR5070953      | B090 | 2003 | Finland      |
| SAMEA751161 | SRR5070917      | B093 | 2006 | Finland      |
| SAMEA751162 | SRR5070933      | B070 | 1962 | Denmark      |
| SAMEA751163 | SRR5070915      | B071 | 1968 | Denmark      |
| SAMEA751164 | SRR5070958      | B076 | 2002 | Denmark      |
| SAMEA751165 | SRR5070900      | B077 | 2005 | Denmark      |
| SAMEA751166 | SRR5070766      | B285 | 2007 | China_Taiwan |
| SAMEA751167 | SRR5070809      | B041 | NA   | Australia    |
| SAMEA751168 | SRR5070873      | B333 | 2001 | USA          |
| SAMEA751169 | SRR5070856      | B311 | 1977 | USA          |
| SAMEA751170 | SRR5070872      | B335 | 2003 | USA          |
| SAMEA751171 | SRR5070875      | B319 | 1997 | USA          |
| SAMEA751172 | SRR5070903      | B308 | 1935 | USA          |
| SAMEA751173 | SRR5070879      | B089 | 2003 | Finland      |
| SAMEA751174 | GCA_001210145.1 | B081 | 1965 | Finland      |
| SAMEA751175 | SRR5070939      | B069 | 1957 | China        |
| SAMEA751176 | SRR5070846      | B312 | 1977 | USA          |
| SAMEA751177 | SRR5070898      | B310 | 1946 | USA          |
| SAMEA751178 | SRR5070870      | B309 | 1939 | USA          |
| SAMEA751179 | SRR5070966      | B173 | 1976 | Netherlands  |
| SAMEA751180 | SRR5070938      | B163 | 1950 | Netherlands  |
| SAMEA751181 | SRR5070892      | B313 | 1977 | USA          |
| SAMEA751182 | SRR5070902      | B320 | 1997 | USA          |
| SAMEA751183 | SRR5070829      | B026 | 1995 | Australia    |
| SAMEA751184 | SRR5070878      | B006 | 2001 | Argentina    |
| SAMEA751189 | SRR5070895      | B078 | 2007 | Denmark      |
| SAMEA751196 | SRR5070859      | B057 | 2001 | Canada       |
| SAMEA751203 | SRR5070857      | B056 | 2001 | Canada       |
| SAMEA751209 | SRR5070858      | B052 | 1995 | Canada       |
| SAMEA751214 | SRR5070844      | B055 | 2000 | Canada       |
| SAMEA751218 | SRR5070855      | B054 | 1995 | Canada       |
| SAMEA751222 | SRR5070865      | B053 | 1995 | Canada       |
| SAMEA751239 | SRR5070906      | B318 | 1995 | USA          |
| SAMEA751241 | SRR5070794      | B323 | 1998 | USA          |
| SAMEA751244 | SRR5070861      | B322 | 1998 | USA          |
| SAMEA751246 | SRR5070885      | B324 | 1999 | USA          |
| SAMEA751248 | SRR5070798      | B327 | 1999 | USA          |

|             |                 |      |      |                |
|-------------|-----------------|------|------|----------------|
| SAMEA751250 | SRR5070795      | B328 | 2000 | USA            |
| SAMEA751252 | SRR5070789      | B325 | 1999 | USA            |
| SAMEA751255 | SRR5070832      | B326 | 1999 | USA            |
| SAMEA751257 | SRR5070862      | B329 | 2000 | USA            |
| SAMEA751259 | SRR5070840      | B330 | 2000 | USA            |
| SAMEA751261 | SRR5070956      | B337 | 2003 | USA            |
| SAMEA751263 | SRR5070910      | B197 | 1996 | Netherlands    |
| SAMEA751266 | SRR5070973      | B225 | 1997 | Poland         |
| SAMEA751268 | SRR5071009      | B233 | 1974 | Poland         |
| SAMEA751270 | SRR5071011      | B230 | 1974 | Poland         |
| SAMEA751272 | SRR5070913      | B240 | 1993 | Senegal        |
| SAMEA751277 | SRR5071005      | B226 | 1997 | Poland         |
| SAMEA751279 | SRR5070997      | B223 | 1962 | Poland         |
| SAMEA751281 | SRR5070734      | NA   | NA   | NA             |
| SAMEA751283 | SRR5070996      | B222 | 1998 | Poland         |
| SAMEA751286 | SRR5070802      | B263 | 2004 | Sweden         |
| SAMEA751288 | SRR5070823      | B257 | 2000 | Sweden         |
| SAMEA751290 | SRR5070839      | B060 | 2001 | Canada         |
| SAMEA751292 | SRR5070827      | B259 | 2004 | Sweden         |
| SAMEA751294 | SRR5070824      | B256 | 1999 | Sweden         |
| SAMEA751296 | SRR5070819      | B260 | 2004 | Sweden         |
| SAMEA751307 | SRR5070793      | B264 | 2006 | Sweden         |
| SAMEA751309 | SRR5070803      | B262 | 2004 | Sweden         |
| SAMEA751314 | SRR5070754      | B247 | 1970 | Sweden         |
| SAMEA751316 | SRR5070726      | B289 | 2008 | United_Kingdom |
| SAMEA751318 | SRR5070761      | B250 | 1970 | Sweden         |
| SAMEA751320 | SRR5070738      | B248 | 1970 | Sweden         |
| SAMEA751323 | SRR5070737      | B288 | 2007 | United_Kingdom |
| SAMEA751325 | SRR5070772      | B305 | 2006 | United_Kingdom |
| SAMEA751327 | SRR5070781      | B307 | 2008 | United_Kingdom |
| SAMEA751329 | SRR5070730      | B306 | 2007 | United_Kingdom |
| SAMEA751332 | SRR5070745      | B251 | 1971 | Sweden         |
| SAMEA751334 | SRR5070721      | B249 | 1970 | Sweden         |
| SAMEA751337 | SRR5070797      | B034 | 1998 | Australia      |
| SAMEA751339 | SRR5070821      | B254 | 1998 | Sweden         |
| SAMEA751341 | SRR5070788      | B332 | 2001 | USA            |
| SAMEA751343 | SRR5070835      | B258 | 2002 | Sweden         |
| SAMEA751345 | SRR5070744      | B098 | 1996 | France         |
| SAMEA751348 | GCA_001212525.1 | B097 | 1995 | France         |
| SAMEA751350 | SRR5070759      | B096 | 1993 | France         |
| SAMEA751353 | SRR5070752      | B095 | 1993 | France         |
| SAMEA751354 | SRR5070784      | B246 | 1956 | Sweden         |
| SAMEA751357 | SRR5070837      | B255 | 1999 | Sweden         |

|             |            |         |      |                |
|-------------|------------|---------|------|----------------|
| SAMEA751359 | SRR5070792 | B261    | 2004 | Sweden         |
| SAMEA751360 | SRR5070920 | B175    | 1977 | Netherlands    |
| SAMEA751362 | SRR5070959 | B187    | 1990 | Netherlands    |
| SAMEA751364 | SRR5070907 | B189    | 1991 | Netherlands    |
| SAMEA751366 | SRR5070960 | B201    | 2000 | Netherlands    |
| SAMEA751368 | SRR5070891 | B316    | 1993 | USA            |
| SAMEA751372 | SRR5070810 | B100    | 2000 | France         |
| SAMEA751374 | SRR5070836 | B099    | 1999 | France         |
| SAMEA751376 | SRR5071023 | B235    | 2000 | Poland         |
| SAMEA751378 | SRR5071016 | 1388980 | NA   | NA             |
| SAMEA751380 | SRR5070746 | B252    | 1986 | Sweden         |
| SAMEA751382 | SRR5070842 | B331    | 2000 | USA            |
| SAMEA751384 | SRR5071021 | B224    | 1997 | Poland         |
| SAMEA751386 | SRR5071029 | B227    | 1995 | Poland         |
| SAMEA751388 | SRR5071020 | B232    | 1997 | Poland         |
| SAMEA751390 | SRR5071004 | 939980  | NA   | NA             |
| SAMEA751392 | SRR5070977 | B229    | 1998 | Poland         |
| SAMEA751394 | SRR5071007 | B231    | 1997 | Poland         |
| SAMEA751397 | SRR5070987 | B228    | 1999 | Poland         |
| SAMEA751399 | SRR5070970 | B234    | 1967 | Poland         |
| SAMEA751401 | SRR5070777 | B304    | 2005 | United_Kingdom |
| SAMEA751403 | SRR5070818 | B037    | 2000 | Australia      |
| SAMEA751407 | SRR5070807 | B334    | 2002 | USA            |
| SAMEA751409 | SRR5070808 | B101    | 2002 | France         |
| SAMEA751411 | SRR5070838 | B102    | 2004 | France         |
| SAMEA751413 | SRR5070791 | B103    | 2004 | France         |
| SAMEA751417 | SRR5070822 | B105    | 2007 | France         |
| SAMEA751419 | SRR5070813 | NA      | NA   | NA             |
| SAMEA751421 | SRR5070801 | B036    | 1998 | Australia      |
| SAMEA751422 | SRR5070815 | NA      | NA   | NA             |
| SAMEA751423 | SRR5070742 | B303    | 2004 | United_Kingdom |
| SAMEA751424 | SRR5070733 | B294    | 1949 | United_Kingdom |
| SAMEA751425 | SRR5070782 | B293    | 1947 | United_Kingdom |
| SAMEA751426 | SRR5070755 | B062    | 2001 | Canada         |
| SAMEA751427 | SRR5070750 | NA      | NA   | NA             |
| SAMEA751428 | SRR5070693 | B067    | 2005 | Canada         |
| SAMEA751429 | SRR5070690 | B066    | 2004 | Canada         |
| SAMEA751430 | SRR5070712 | B292    | 1946 | United_Kingdom |
| SAMEA751431 | SRR5070720 | B291    | 1942 | United_Kingdom |
| SAMEA751432 | SRR5070703 | B290    | 1920 | United_Kingdom |
| SAMEA751433 | SRR5070689 | B064    | 2002 | Canada         |
| SAMEA751434 | SRR5070796 | B314    | 1978 | USA            |
| SAMEA751435 | SRR5070709 | B279    | 2005 | China_Taiwan   |

|             |            |        |      |                |
|-------------|------------|--------|------|----------------|
| SAMEA751436 | SRR5071000 | 142801 | NA   | NA             |
| SAMEA751437 | SRR5070708 | B274   | 2003 | China_Taiwan   |
| SAMEA751438 | SRR5070830 | B272   | 2000 | China_Taiwan   |
| SAMEA751439 | SRR5070811 | B273   | 2000 | China_Taiwan   |
| SAMEA751440 | SRR5070826 | B270   | 1999 | China_Taiwan   |
| SAMEA751441 | SRR5070804 | B271   | 1999 | China_Taiwan   |
| SAMEA751442 | SRR5070831 | B276   | 2003 | China_Taiwan   |
| SAMEA751443 | SRR5070841 | B269   | 1999 | China_Taiwan   |
| SAMEA751444 | SRR5070820 | B267   | 1998 | China_Taiwan   |
| SAMEA751445 | SRR5070834 | B268   | 1998 | China_Taiwan   |
| SAMEA751446 | SRR5070814 | B266   | 1997 | China_Taiwan   |
| SAMEA751447 | SRR5070896 | B127   | 1991 | Japan          |
| SAMEA751448 | SRR5070905 | B128   | 1991 | Japan          |
| SAMEA751449 | SRR5070847 | B122   | 1994 | Italy          |
| SAMEA751450 | SRR5070868 | B112   | 1994 | Italy          |
| SAMEA751451 | SRR5070893 | B126   | 1988 | Japan          |
| SAMEA751452 | SRR5070886 | B125   | 1995 | Italy          |
| SAMEA751453 | SRR5070883 | B113   | 1994 | Italy          |
| SAMEA751454 | SRR5070667 | B280   | 2005 | China_Taiwan   |
| SAMEA751455 | SRR5070783 | B059   | 2001 | Canada         |
| SAMEA751456 | SRR5070715 | B282   | 2006 | China_Taiwan   |
| SAMEA751457 | SRR5070676 | B281   | 2005 | China_Taiwan   |
| SAMEA751458 | SRR5070662 | B277   | 2003 | China_Taiwan   |
| SAMEA751459 | SRR5070825 | B049   | 2007 | Australia      |
| SAMEA751460 | SRR5070669 | B278   | 2004 | China_Taiwan   |
| SAMEA751461 | SRR5070806 | B058   | 2001 | Canada         |
| SAMEA751462 | SRR5070687 | B299   | 1983 | United_Kingdom |
| SAMEA751463 | SRR5070682 | B300   | 1998 | United_Kingdom |
| SAMEA751464 | SRR5070713 | B301   | 2001 | United_Kingdom |
| SAMEA751465 | SRR5070688 | B302   | 2003 | United_Kingdom |
| SAMEA751466 | SRR5070695 | B284   | 2007 | China_Taiwan   |
| SAMEA751467 | SRR5070664 | B283   | 2006 | China_Taiwan   |
| SAMEA751468 | SRR5070704 | B297   | 1982 | United_Kingdom |
| SAMEA751469 | SRR5070673 | B298   | 1982 | United_Kingdom |
| SAMEA751470 | SRR5070817 | B031   | 1997 | Australia      |
| SAMEA751471 | SRR5070805 | B048   | 2006 | Australia      |
| SAMEA751472 | SRR5070767 | B028   | 1995 | Australia      |
| SAMEA751473 | SRR5070779 | B027   | 1995 | Australia      |
| SAMEA751474 | SRR5070727 | B042   | 2002 | Australia      |
| SAMEA751475 | SRR5070728 | B039   | 2000 | Australia      |
| SAMEA751476 | SRR5070725 | B047   | 2004 | Australia      |
| SAMEA751477 | SRR5070774 | B046   | 2004 | Australia      |
| SAMEA751478 | SRR5070685 | B295   | 1967 | United_Kingdom |



|             |            |      |      |                |
|-------------|------------|------|------|----------------|
| SAMEA751479 | SRR5070740 | B022 | 1989 | Australia      |
| SAMEA751480 | SRR5070768 | B050 | 2007 | Australia      |
| SAMEA751481 | SRR5070718 | B296 | 1979 | United_Kingdom |
| SAMEA751482 | SRR5070786 | B001 | 1969 | Argentina      |
| SAMEA751484 | SRR5070887 | B167 | 1954 | Netherlands    |
| SAMEA751485 | SRR5070850 | B139 | 2004 | Japan          |
| SAMEA751486 | SRR5070876 | B140 | 2004 | Japan          |
| SAMEA751487 | SRR5070845 | B137 | 2002 | Japan          |
| SAMEA751488 | SRR5070897 | B138 | 2003 | Japan          |
| SAMEA751489 | SRR5070904 | B135 | 1999 | Japan          |
| SAMEA751490 | SRR5070860 | B136 | 2001 | Japan          |
| SAMEA751491 | SRR5070864 | B133 | 1998 | Japan          |
| SAMEA751492 | SRR5070882 | B134 | 1999 | Japan          |
| SAMEA751493 | SRR5070863 | B130 | 1995 | Japan          |
| SAMEA751494 | SRR5070698 | B286 | 2007 | China_Taiwan   |
| SAMEA751495 | SRR5070848 | NA   | NA   | NA             |
| SAMEA751496 | SRR5070853 | B118 | 1994 | Italy          |
| SAMEA751497 | SRR5070869 | B114 | 1994 | Italy          |
| SAMEA751498 | SRR5070871 | B119 | 1994 | Italy          |
| SAMEA751499 | SRR5070756 | B020 | 1982 | Australia      |
| SAMEA751500 | SRR5070765 | B029 | 1996 | Australia      |
| SAMEA751501 | SRR5070723 | B021 | 1989 | Australia      |
| SAMEA751502 | SRR5070773 | B035 | 1998 | Australia      |
| SAMEA751503 | SRR5070816 | B265 | 1992 | China_Taiwan   |
| SAMEA751504 | SRR5070800 | B275 | 2003 | China_Taiwan   |
| SAMEA751505 | SRR5070867 | B164 | 1952 | Netherlands    |
| SAMEA751506 | SRR5070764 | B044 | 2002 | Australia      |
| SAMEA751507 | SRR5070735 | B045 | NA   | Australia      |
| SAMEA751508 | SRR5070732 | B015 | 1971 | Australia      |
| SAMEA751509 | SRR5070731 | B014 | 1971 | Australia      |
| SAMEA751510 | SRR5070751 | B032 | 1997 | Australia      |
| SAMEA751511 | SRR5070762 | B018 | 1977 | Australia      |
| SAMEA751512 | SRR5070778 | B017 | 1977 | Australia      |
| SAMEA751513 | SRR5070780 | B016 | 1974 | Australia      |
| SAMEA751514 | SRR5070724 | B024 | 1989 | Australia      |
| SAMEA751515 | SRR5070753 | B030 | 1997 | Australia      |
| SAMEA751516 | SRR5070812 | B007 | NA   | Argentina      |
| SAMEA751517 | SRR5070787 | B008 | 2003 | Argentina      |
| SAMEA751518 | SRR5070833 | B010 | 2006 | Argentina      |
| SAMEA751519 | SRR5070785 | B011 | 2007 | Argentina      |
| SAMEA751520 | SRR5070760 | B023 | 1989 | Australia      |
| SAMEA751521 | SRR5070776 | B025 | 1990 | Australia      |
| SAMEA751522 | SRR5070881 | B132 | 1996 | Japan          |

|              |            |        |      |        |
|--------------|------------|--------|------|--------|
| SAMEA7765869 | ERR5101994 | FR0270 | 1996 | France |
| SAMEA7765870 | ERR5101995 | FR0694 | 1999 | France |
| SAMEA7765871 | ERR5101996 | FR3469 | 2005 | France |
| SAMEA7765872 | ERR5101997 | FR3749 | 2007 | France |
| SAMEA7765873 | ERR5101998 | FR6595 | 2018 | France |
| SAMEA7765874 | ERR5101999 | FR0432 | 1997 | France |
| SAMEA7765875 | ERR5102000 | FR0658 | 1998 | France |
| SAMEA7765876 | ERR5102001 | FR4624 | 2009 | France |
| SAMEA7765877 | ERR5102002 | FR5771 | 2013 | France |
| SAMEA7765878 | ERR5102003 | FR5683 | 2013 | France |
| SAMEA7765879 | ERR5102004 | FR3098 | 2004 | France |
| SAMEA7765880 | ERR5102005 | FR3112 | 2004 | France |
| SAMEA7765881 | ERR5102006 | FR3276 | 2005 | France |
| SAMEA7765882 | ERR5102007 | FR3421 | 2005 | France |
| SAMEA7765883 | ERR5102008 | FR3424 | 2005 | France |
| SAMEA7765884 | ERR5102009 | FR3512 | 2006 | France |
| SAMEA7765885 | ERR5102010 | FR3693 | 2007 | France |
| SAMEA7765886 | ERR5102011 | FR3705 | 2007 | France |
| SAMEA7765887 | ERR5102012 | FR3708 | 2007 | France |
| SAMEA7765888 | ERR5102013 | FR3793 | 2007 | France |
| SAMEA7765889 | ERR5102014 | FR3925 | 2008 | France |
| SAMEA7765890 | ERR5102015 | FR4028 | 2009 | France |
| SAMEA7765891 | ERR5102016 | FR4068 | 2009 | France |
| SAMEA7765892 | ERR5102017 | FR4072 | 2009 | France |
| SAMEA7765893 | ERR5102018 | FR4591 | 2009 | France |
| SAMEA7765894 | ERR5102019 | FR4596 | 2009 | France |
| SAMEA7765895 | ERR5102020 | FR4611 | 2009 | France |
| SAMEA7765896 | ERR5102021 | FR4612 | 2009 | France |
| SAMEA7765898 | ERR5102023 | FR4683 | 2010 | France |
| SAMEA7765899 | ERR5102024 | FR4684 | 2010 | France |
| SAMEA7765900 | ERR5102025 | FR4688 | 2010 | France |
| SAMEA7765901 | ERR5102026 | FR4698 | 2010 | France |
| SAMEA7765902 | ERR5102027 | FR4868 | 2011 | France |
| SAMEA7765903 | ERR5102028 | FR4873 | 2011 | France |
| SAMEA7765904 | ERR5102029 | FR4882 | 2011 | France |
| SAMEA7765905 | ERR5102030 | FR4913 | 2011 | France |
| SAMEA7765906 | ERR5102031 | FR4916 | 2011 | France |
| SAMEA7765907 | ERR5102032 | FR4923 | 2011 | France |
| SAMEA7765908 | ERR5102033 | FR4937 | 2011 | France |
| SAMEA7765909 | ERR5102034 | FR4947 | 2011 | France |
| SAMEA7765910 | ERR5102035 | FR4950 | 2011 | France |
| SAMEA7765911 | ERR5102036 | FR4952 | 2011 | France |
| SAMEA7765912 | ERR5102037 | FR4953 | 2011 | France |

|              |             |        |      |        |
|--------------|-------------|--------|------|--------|
| SAMEA7765913 | ERR5102038  | FR4963 | 2011 | France |
| SAMEA7765914 | SRR13259122 | FR4964 | 2011 | France |
| SAMEA7765915 | SRR12778362 | FR5001 | 2011 | France |
| SAMEA7765916 | SRR12778351 | FR5018 | 2011 | France |
| SAMEA7765917 | SRR12778346 | FR5027 | 2011 | France |
| SAMEA7765919 | SRR12778345 | FR5043 | 2012 | France |
| SAMEA7765920 | SRR13566360 | FR5126 | 2012 | France |
| SAMEA7765921 | SRR13566359 | FR5186 | 2012 | France |
| SAMEA7765926 | ERR5102050  | FR5257 | 2012 | France |
| SAMEA7765927 | ERR5102051  | FR5259 | 2012 | France |
| SAMEA7765928 | ERR5102052  | FR5261 | 2012 | France |
| SAMEA7765929 | ERR5102053  | FR5290 | 2012 | France |
| SAMEA7765930 | ERR5102054  | FR5299 | 2012 | France |
| SAMEA7765931 | ERR5102055  | FR5302 | 2012 | France |
| SAMEA7765932 | ERR5102056  | FR5308 | 2012 | France |
| SAMEA7765933 | ERR5102057  | FR5317 | 2012 | France |
| SAMEA7765934 | ERR5102058  | FR5345 | 2012 | France |
| SAMEA7765935 | ERR5102059  | FR5347 | 2012 | France |
| SAMEA7765936 | ERR5102060  | FR5363 | 2012 | France |
| SAMEA7765937 | ERR5102061  | FR5388 | 2012 | France |
| SAMEA7765938 | ERR5102062  | FR5391 | 2012 | France |
| SAMEA7765939 | ERR5102063  | FR5394 | 2012 | France |
| SAMEA7765940 | ERR5102064  | FR5433 | 2013 | France |
| SAMEA7765941 | ERR5102065  | FR5461 | 2013 | France |
| SAMEA7765942 | ERR5102066  | FR5465 | 2013 | France |
| SAMEA7765943 | ERR5102067  | FR5477 | 2013 | France |
| SAMEA7765944 | ERR5102068  | FR5478 | 2013 | France |
| SAMEA7765945 | ERR5102069  | FR5481 | 2013 | France |
| SAMEA7765946 | ERR5102070  | FR5490 | 2013 | France |
| SAMEA7765947 | ERR5102071  | FR5495 | 2013 | France |
| SAMEA7765948 | ERR5102072  | FR5506 | 2013 | France |
| SAMEA7765949 | ERR5102073  | FR5516 | 2013 | France |
| SAMEA7765950 | ERR5102074  | FR5563 | 2013 | France |
| SAMEA7765951 | ERR5102075  | FR5570 | 2013 | France |
| SAMEA7765952 | ERR5102076  | FR5579 | 2013 | France |
| SAMEA7765953 | ERR5102077  | FR5685 | 2013 | France |
| SAMEA7765954 | ERR5102078  | FR5686 | 2013 | France |
| SAMEA7765955 | ERR5102079  | FR5697 | 2013 | France |
| SAMEA7765956 | ERR5102080  | FR5713 | 2013 | France |
| SAMEA7765957 | ERR5102081  | FR5714 | 2013 | France |
| SAMEA7765958 | ERR5102082  | FR5742 | 2013 | France |
| SAMEA7765960 | ERR5102084  | FR5772 | 2013 | France |
| SAMEA7765961 | ERR5102085  | FR5781 | 2013 | France |

|              |            |        |      |        |
|--------------|------------|--------|------|--------|
| SAMEA7765962 | ERR5102086 | FR5845 | 2014 | France |
| SAMEA7765963 | ERR5102087 | FR5851 | 2014 | France |
| SAMEA7765964 | ERR5102088 | FR5875 | 2014 | France |
| SAMEA7765965 | ERR5102089 | FR5916 | 2014 | France |
| SAMEA7765966 | ERR5102090 | FR5938 | 2014 | France |
| SAMEA7765967 | ERR5102091 | FR5947 | 2014 | France |
| SAMEA7765968 | ERR5102092 | FR5952 | 2014 | France |
| SAMEA7765969 | ERR5102093 | FR5956 | 2014 | France |
| SAMEA7765970 | ERR5102094 | FR5982 | 2015 | France |
| SAMEA7765971 | ERR5102095 | FR5991 | 2015 | France |
| SAMEA7765972 | ERR5102096 | FR5998 | 2015 | France |
| SAMEA7765973 | ERR5102097 | FR5999 | 2015 | France |
| SAMEA7765974 | ERR5102098 | FR6024 | 2015 | France |
| SAMEA7765979 | ERR5101983 | FR6064 | 2016 | France |
| SAMEA7765980 | ERR5101984 | FR6069 | 2016 | France |
| SAMEA7765981 | ERR5101985 | FR6070 | 2016 | France |
| SAMEA7765982 | ERR5101986 | FR6080 | 2016 | France |
| SAMEA7765983 | ERR5101987 | FR6081 | 2016 | France |
| SAMEA7765984 | ERR5101988 | FR6083 | 2016 | France |
| SAMEA7765985 | ERR5101989 | FR6085 | 2016 | France |
| SAMEA7765986 | ERR5102110 | FR6093 | 2016 | France |
| SAMEA7765987 | ERR5102111 | FR6142 | 2016 | France |
| SAMEA7765988 | ERR5102112 | FR6143 | 2016 | France |
| SAMEA7765989 | ERR5102113 | FR6152 | 2016 | France |
| SAMEA7765990 | ERR5102114 | FR6160 | 2016 | France |
| SAMEA7765991 | ERR5102115 | FR6163 | 2016 | France |
| SAMEA7765992 | ERR5102116 | FR6164 | 2016 | France |
| SAMEA7765993 | ERR5102117 | FR6173 | 2016 | France |
| SAMEA7765994 | ERR5102118 | FR6174 | 2016 | France |
| SAMEA7765995 | ERR5102119 | FR6183 | 2017 | France |
| SAMEA7765996 | ERR5102120 | FR6194 | 2017 | France |
| SAMEA7765997 | ERR5102121 | FR6237 | 2017 | France |
| SAMEA7765998 | ERR5102122 | FR6238 | 2017 | France |
| SAMEA7765999 | ERR5102123 | FR6239 | 2017 | France |
| SAMEA7766000 | ERR5102124 | FR6241 | 2017 | France |
| SAMEA7766001 | ERR5102125 | FR6246 | 2017 | France |
| SAMEA7766002 | ERR5102126 | FR6247 | 2017 | France |
| SAMEA7766003 | ERR5102127 | FR6270 | 2017 | France |
| SAMEA7766004 | ERR5102128 | FR6305 | 2017 | France |
| SAMEA7766005 | ERR5102129 | FR6322 | 2017 | France |
| SAMEA7766006 | ERR5102130 | FR6323 | 2017 | France |
| SAMEA7766007 | ERR5102131 | FR6327 | 2017 | France |
| SAMEA7766008 | ERR5102132 | FR6350 | 2017 | France |

|              |            |        |      |        |
|--------------|------------|--------|------|--------|
| SAMEA7766009 | ERR5102133 | FR6354 | 2017 | France |
| SAMEA7766010 | ERR5102134 | FR6356 | 2017 | France |
| SAMEA7766011 | ERR5102135 | FR6360 | 2017 | France |
| SAMEA7766012 | ERR5102136 | FR6361 | 2017 | France |
| SAMEA7766013 | ERR5102137 | FR6362 | 2017 | France |
| SAMEA7766014 | ERR5102138 | FR6365 | 2017 | France |
| SAMEA7766015 | ERR5102139 | FR6368 | 2017 | France |
| SAMEA7766016 | ERR5102140 | FR6374 | 2017 | France |
| SAMEA7766017 | ERR5102141 | FR6385 | 2017 | France |
| SAMEA7766018 | ERR5102142 | FR6386 | 2017 | France |
| SAMEA7766019 | ERR5102143 | FR6388 | 2017 | France |
| SAMEA7766020 | ERR5102144 | FR6390 | 2017 | France |
| SAMEA7766021 | ERR5102145 | FR6393 | 2017 | France |
| SAMEA7766022 | ERR5102146 | FR6394 | 2017 | France |
| SAMEA7766023 | ERR5102147 | FR6397 | 2017 | France |
| SAMEA7766024 | ERR5102148 | FR6398 | 2017 | France |
| SAMEA7766025 | ERR5102149 | FR6403 | 2017 | France |
| SAMEA7766026 | ERR5102150 | FR6415 | 2017 | France |
| SAMEA7766027 | ERR5102151 | FR6419 | 2017 | France |
| SAMEA7766028 | ERR5102152 | FR6424 | 2017 | France |
| SAMEA7766029 | ERR5102153 | FR6428 | 2018 | France |
| SAMEA7766030 | ERR5102154 | FR6462 | 2018 | France |
| SAMEA7766031 | ERR5102155 | FR6463 | 2018 | France |
| SAMEA7766032 | ERR5102156 | FR6466 | 2018 | France |
| SAMEA7766033 | ERR5102157 | FR6469 | 2018 | France |
| SAMEA7766034 | ERR5102158 | FR6470 | 2018 | France |
| SAMEA7766035 | ERR5102039 | FR6497 | 2018 | France |
| SAMEA7766036 | ERR5102040 | FR6510 | 2018 | France |
| SAMEA7766037 | ERR5102041 | FR6520 | 2018 | France |
| SAMEA7766038 | ERR5102042 | FR6522 | 2018 | France |
| SAMEA7766039 | ERR5102043 | FR6525 | 2018 | France |
| SAMEA7766040 | ERR5102044 | FR6527 | 2018 | France |
| SAMEA7766041 | ERR5102045 | FR6537 | 2018 | France |
| SAMEA7766042 | ERR5102046 | FR6538 | 2018 | France |
| SAMEA7766043 | ERR5102047 | FR6539 | 2018 | France |
| SAMEA7766044 | ERR5102048 | FR6548 | 2018 | France |
| SAMEA7766045 | ERR5102049 | FR6568 | 2018 | France |
| SAMEA7766046 | ERR5102168 | FR6573 | 2018 | France |
| SAMEA7766047 | ERR5102169 | FR6585 | 2018 | France |
| SAMEA7766048 | ERR5102170 | FR6589 | 2018 | France |
| SAMEA7766049 | ERR5102171 | FR6596 | 2018 | France |
| SAMEA7766050 | ERR5102172 | FR6600 | 2018 | France |
| SAMEA7766051 | ERR5102099 | FR6610 | 2018 | France |

|              |             |        |      |        |
|--------------|-------------|--------|------|--------|
| SAMEA7766052 | ERR5102100  | FR6616 | 2018 | France |
| SAMEA7766053 | ERR5102101  | FR6620 | 2018 | France |
| SAMEA7766054 | ERR5102102  | FR6625 | 2018 | France |
| SAMEA7766055 | ERR5102103  | FR6626 | 2018 | France |
| SAMEA7766056 | ERR5102104  | FR6632 | 2018 | France |
| SAMEA7766057 | ERR5102105  | FR6641 | 2018 | France |
| SAMEA7766058 | ERR5102106  | FR6643 | 2018 | France |
| SAMEA7766059 | ERR5102107  | FR6686 | 2018 | France |
| SAMEA8391024 | ERR5102108  | NA     | 2017 | India  |
| SAMEA8391025 | ERR5102109  | NA     | 2017 | India  |
| SAMEA8901098 | ERR6044072  | NA     | 1953 | France |
| SAMEA8901099 | ERR6044073  | NA     | 1993 | France |
| SAMEA8901100 | ERR6044074  | NA     | 1994 | France |
| SAMEA8901101 | ERR6044075  | NA     | 1994 | France |
| SAMEA8901102 | ERR6044076  | NA     | 1994 | France |
| SAMEA8901103 | ERR6044077  | NA     | 1994 | France |
| SAMEA8901104 | ERR6044078  | NA     | 1994 | France |
| SAMEA8901105 | ERR6044079  | NA     | 1994 | France |
| SAMEA8901106 | ERR6044080  | NA     | 1994 | France |
| SAMEA8901107 | ERR6044081  | NA     | 1994 | France |
| SAMEA8901108 | ERR6044082  | NA     | 1994 | France |
| SAMEA8901109 | ERR6044087  | NA     | 1994 | France |
| SAMEA8901110 | ERR6044088  | NA     | 1994 | France |
| SAMEA8901111 | ERR6044089  | NA     | 1994 | France |
| SAMEA8901112 | ERR6044090  | NA     | 1994 | France |
| SAMEA8901113 | ERR6044218  | NA     | 1994 | France |
| SAMEA8901114 | ERR6044216  | NA     | 1994 | France |
| SAMEA8901115 | ERR6044221  | NA     | 1995 | France |
| SAMEA8901116 | ERR6044217  | NA     | 1995 | France |
| SAMEA8901117 | ERR6044091  | NA     | 1995 | France |
| SAMEA8901118 | ERR6044092  | NA     | 1995 | France |
| SAMEA8901119 | ERR6044093  | NA     | 1995 | France |
| SAMEA8901120 | ERR6044094  | NA     | 1995 | France |
| SAMEA8901121 | ERR6044095  | NA     | 1995 | France |
| SAMEA8901122 | ERR6044096  | NA     | 1995 | France |
| SAMEA8901123 | ERR6044097  | NA     | 1995 | France |
| SAMEA8901124 | SRR14288254 | NA     | 1995 | France |
| SAMEA8901125 | SRR14288253 | NA     | 1995 | France |
| SAMEA8901126 | SRR14288252 | NA     | 1995 | France |
| SAMEA8901127 | SRR14288251 | NA     | 1995 | France |
| SAMEA8901128 | ERR6044102  | NA     | 1995 | France |
| SAMEA8901129 | ERR6044103  | NA     | 1995 | France |
| SAMEA8901130 | ERR6044104  | NA     | 1995 | France |

|              |            |    |      |        |
|--------------|------------|----|------|--------|
| SAMEA8901131 | ERR6044105 | NA | 1995 | France |
| SAMEA8901132 | ERR6044106 | NA | 1995 | France |
| SAMEA8901133 | ERR6044107 | NA | 1995 | France |
| SAMEA8901134 | ERR6044108 | NA | 1995 | France |
| SAMEA8901135 | ERR6044109 | NA | 1995 | France |
| SAMEA8901136 | ERR6044110 | NA | 1995 | France |
| SAMEA8901137 | ERR6044111 | NA | 1995 | France |
| SAMEA8901138 | ERR6044112 | NA | 1995 | France |
| SAMEA8901139 | ERR6044113 | NA | 1995 | France |
| SAMEA8901140 | ERR6044114 | NA | 1995 | France |
| SAMEA8901141 | ERR6044115 | NA | 1995 | France |
| SAMEA8901142 | ERR6044116 | NA | 1995 | France |
| SAMEA8901143 | ERR6044117 | NA | 1995 | France |
| SAMEA8901144 | ERR6044118 | NA | 1995 | France |
| SAMEA8901145 | ERR6044119 | NA | 1995 | France |
| SAMEA8901146 | ERR6044120 | NA | 1995 | France |
| SAMEA8901147 | ERR6044121 | NA | 1995 | France |
| SAMEA8901148 | ERR6044126 | NA | 1995 | France |
| SAMEA8901149 | ERR6044127 | NA | 1995 | France |
| SAMEA8901150 | ERR6044128 | NA | 1995 | France |
| SAMEA8901151 | ERR6044129 | NA | 1995 | France |
| SAMEA8901152 | ERR6044223 | NA | 1996 | France |
| SAMEA8901153 | ERR6044219 | NA | 1996 | France |
| SAMEA8901154 | ERR6044317 | NA | 1996 | France |
| SAMEA8901155 | ERR6044220 | NA | 1996 | France |
| SAMEA8901156 | ERR6044130 | NA | 1996 | France |
| SAMEA8901157 | ERR6044131 | NA | 1996 | France |
| SAMEA8901158 | ERR6044132 | NA | 1996 | France |
| SAMEA8901159 | ERR6044133 | NA | 1996 | France |
| SAMEA8901160 | ERR6044134 | NA | 1996 | France |
| SAMEA8901161 | ERR6044135 | NA | 1996 | France |
| SAMEA8901162 | ERR6044136 | NA | 1996 | France |
| SAMEA8901163 | ERR6044137 | NA | 1996 | France |
| SAMEA8901164 | ERR6044138 | NA | 1996 | France |
| SAMEA8901165 | ERR6044139 | NA | 1996 | France |
| SAMEA8901166 | ERR6044140 | NA | 1996 | France |
| SAMEA8901167 | ERR6044141 | NA | 1996 | France |
| SAMEA8901168 | ERR6044142 | NA | 1996 | France |
| SAMEA8901169 | ERR6044143 | NA | 1996 | France |
| SAMEA8901170 | ERR6044144 | NA | 1996 | France |
| SAMEA8901171 | ERR6044145 | NA | 1996 | France |
| SAMEA8901172 | ERR6044146 | NA | 1997 | France |
| SAMEA8901173 | ERR6044147 | NA | 1997 | France |

|              |            |    |      |        |
|--------------|------------|----|------|--------|
| SAMEA8901174 | ERR6044148 | NA | 1997 | France |
| SAMEA8901175 | ERR6044149 | NA | 1997 | France |
| SAMEA8901176 | ERR6044150 | NA | 1997 | France |
| SAMEA8901177 | ERR6044151 | NA | 1997 | France |
| SAMEA8901178 | ERR6044152 | NA | 1997 | France |
| SAMEA8901179 | ERR6044153 | NA | 1997 | France |
| SAMEA8901180 | ERR6044154 | NA | 1997 | France |
| SAMEA8901181 | ERR6044155 | NA | 1997 | France |
| SAMEA8901182 | ERR6044156 | NA | 1998 | France |
| SAMEA8901183 | ERR6044157 | NA | 1998 | France |
| SAMEA8901184 | ERR6044158 | NA | 1998 | France |
| SAMEA8901185 | ERR6044159 | NA | 1998 | France |
| SAMEA8901186 | ERR6044160 | NA | 1998 | France |
| SAMEA8901187 | ERR6044161 | NA | 1998 | France |
| SAMEA8901188 | DRR300247  | NA | 1998 | France |
| SAMEA8901189 | DRR300248  | NA | 1998 | France |
| SAMEA8901190 | DRR300249  | NA | 1998 | France |
| SAMEA8901191 | DRR300250  | NA | 1998 | France |
| SAMEA8901192 | ERR6044166 | NA | 1998 | France |
| SAMEA8901193 | ERR6044167 | NA | 1998 | France |
| SAMEA8901194 | ERR6044168 | NA | 1998 | France |
| SAMEA8901195 | ERR6044169 | NA | 1998 | France |
| SAMEA8901196 | ERR6044170 | NA | 1998 | France |
| SAMEA8901197 | ERR6044171 | NA | 1998 | France |
| SAMEA8901198 | ERR6044172 | NA | 1998 | France |
| SAMEA8901199 | ERR6044173 | NA | 1998 | France |
| SAMEA8901200 | ERR6044174 | NA | 1998 | France |
| SAMEA8901201 | ERR6044175 | NA | 1998 | France |
| SAMEA8901202 | ERR6044176 | NA | 1998 | France |
| SAMEA8901203 | ERR6044177 | NA | 1998 | France |
| SAMEA8901204 | ERR6044178 | NA | 1998 | France |
| SAMEA8901205 | ERR6044179 | NA | 1999 | France |
| SAMEA8901206 | ERR6044180 | NA | 1999 | France |
| SAMEA8901207 | ERR6044181 | NA | 1999 | France |
| SAMEA8901208 | ERR6044182 | NA | 1999 | France |
| SAMEA8901209 | ERR6044183 | NA | 1999 | France |
| SAMEA8901210 | ERR6044184 | NA | 1999 | France |
| SAMEA8901211 | ERR6044185 | NA | 1999 | France |
| SAMEA8901212 | ERR6044186 | NA | 1999 | France |
| SAMEA8901213 | ERR6044187 | NA | 1999 | France |
| SAMEA8901214 | ERR6044188 | NA | 1999 | France |
| SAMEA8901215 | ERR6044189 | NA | 2000 | France |
| SAMEA8901216 | ERR6044190 | NA | 2000 | France |



|              |            |    |      |        |
|--------------|------------|----|------|--------|
| SAMEA8901217 | ERR6044191 | NA | 2000 | France |
| SAMEA8901218 | ERR6044192 | NA | 2000 | France |
| SAMEA8901219 | ERR6044193 | NA | 2000 | France |
| SAMEA8901220 | ERR6044194 | NA | 2000 | France |
| SAMEA8901221 | ERR6044195 | NA | 2000 | France |
| SAMEA8901222 | ERR6044196 | NA | 2000 | France |
| SAMEA8901223 | ERR6044197 | NA | 2000 | France |
| SAMEA8901224 | ERR6044198 | NA | 2000 | France |
| SAMEA8901225 | ERR6044199 | NA | 2001 | France |
| SAMEA8901226 | ERR6044200 | NA | 2001 | France |
| SAMEA8901227 | ERR6044201 | NA | 2001 | France |
| SAMEA8901228 | ERR6044202 | NA | 2001 | France |
| SAMEA8901229 | ERR6044203 | NA | 2001 | France |
| SAMEA8901230 | ERR6044204 | NA | 2001 | France |
| SAMEA8901231 | ERR6044205 | NA | 2001 | France |
| SAMEA8901232 | ERR6044206 | NA | 2001 | France |
| SAMEA8901233 | ERR6044207 | NA | 2002 | France |
| SAMEA8901234 | ERR6044208 | NA | 2002 | France |
| SAMEA8901235 | ERR6044209 | NA | 2002 | France |
| SAMEA8901236 | ERR6044210 | NA | 2002 | France |
| SAMEA8901237 | ERR6044211 | NA | 2002 | France |
| SAMEA8901238 | ERR6044212 | NA | 2002 | France |
| SAMEA8901239 | ERR6044213 | NA | 2002 | France |
| SAMEA8901240 | ERR6044778 | NA | 2002 | France |
| SAMEA8901241 | ERR6044779 | NA | 2002 | France |
| SAMEA8901242 | ERR6044780 | NA | 2002 | France |
| SAMEA8901243 | ERR6044781 | NA | 2003 | France |
| SAMEA8901244 | ERR6044227 | NA | 2003 | France |
| SAMEA8901245 | ERR6044228 | NA | 2003 | France |
| SAMEA8901246 | ERR6044222 | NA | 2003 | France |
| SAMEA8901247 | ERR6044224 | NA | 2003 | France |
| SAMEA8901248 | ERR6044320 | NA | 2003 | France |
| SAMEA8901249 | ERR6044315 | NA | 2003 | France |
| SAMEA8901250 | ERR6044316 | NA | 2003 | France |
| SAMEA8901251 | ERR6044321 | NA | 2003 | France |
| SAMEA8901252 | ERR6044318 | NA | 2003 | France |
| SAMEA8901253 | ERR6044322 | NA | 2003 | France |
| SAMEA8901254 | ERR6044319 | NA | 2003 | France |
| SAMEA8901256 | ERR6044230 | NA | 2003 | France |
| SAMEA8901257 | ERR6044231 | NA | 2003 | France |
| SAMEA8901259 | ERR6044233 | NA | 2003 | France |
| SAMEA8901260 | ERR6044234 | NA | 2003 | France |
| SAMEA8901261 | ERR6044235 | NA | 2003 | France |

|              |            |    |      |        |
|--------------|------------|----|------|--------|
| SAMEA8901262 | ERR6044236 | NA | 2003 | France |
| SAMEA8901263 | ERR6044237 | NA | 2003 | France |
| SAMEA8901264 | ERR6044238 | NA | 2003 | France |
| SAMEA8901265 | ERR6044239 | NA | 2004 | France |
| SAMEA8901266 | ERR6044240 | NA | 2004 | France |
| SAMEA8901267 | ERR6044241 | NA | 2004 | France |
| SAMEA8901268 | ERR6044242 | NA | 2004 | France |
| SAMEA8901269 | ERR6044243 | NA | 2004 | France |
| SAMEA8901270 | ERR6044244 | NA | 2004 | France |
| SAMEA8901271 | ERR6044930 | NA | 2004 | France |
| SAMEA8901272 | ERR6044931 | NA | 2004 | France |
| SAMEA8901273 | ERR6044932 | NA | 2004 | France |
| SAMEA8901274 | ERR6044933 | NA | 2004 | France |
| SAMEA8901275 | ERR6044249 | NA | 2004 | France |
| SAMEA8901276 | ERR6044250 | NA | 2004 | France |
| SAMEA8901277 | ERR6044251 | NA | 2004 | France |
| SAMEA8901278 | ERR6044252 | NA | 2004 | France |
| SAMEA8901279 | ERR6044253 | NA | 2004 | France |
| SAMEA8901280 | ERR6044254 | NA | 2004 | France |
| SAMEA8901281 | ERR6044255 | NA | 2004 | France |
| SAMEA8901282 | ERR6044256 | NA | 2004 | France |
| SAMEA8901283 | ERR6044257 | NA | 2004 | France |
| SAMEA8901284 | ERR6044258 | NA | 2004 | France |
| SAMEA8901285 | ERR6044259 | NA | 2005 | France |
| SAMEA8901286 | ERR6044260 | NA | 2005 | France |
| SAMEA8901287 | ERR6044261 | NA | 2005 | France |
| SAMEA8901288 | ERR6044262 | NA | 2005 | France |
| SAMEA8901289 | ERR6044263 | NA | 2005 | France |
| SAMEA8901290 | ERR6044264 | NA | 2005 | France |
| SAMEA8901291 | ERR6044265 | NA | 2005 | France |
| SAMEA8901292 | ERR6044266 | NA | 2005 | France |
| SAMEA8901293 | ERR6044267 | NA | 2005 | France |
| SAMEA8901294 | ERR6044268 | NA | 2005 | France |
| SAMEA8901295 | ERR6044269 | NA | 2005 | France |
| SAMEA8901296 | ERR6044270 | NA | 2006 | France |
| SAMEA8901297 | ERR6044271 | NA | 2006 | France |
| SAMEA8901298 | ERR6044272 | NA | 2006 | France |
| SAMEA8901299 | ERR6044273 | NA | 2006 | France |
| SAMEA8901300 | ERR6044274 | NA | 2006 | France |
| SAMEA8901301 | ERR6044275 | NA | 2006 | France |
| SAMEA8901302 | ERR6044276 | NA | 2006 | France |
| SAMEA8901303 | ERR6044277 | NA | 2006 | France |
| SAMEA8901304 | ERR6044278 | NA | 2006 | France |

|              |            |    |      |        |
|--------------|------------|----|------|--------|
| SAMEA8901305 | ERR6044279 | NA | 2006 | France |
| SAMEA8901306 | ERR6044280 | NA | 2006 | France |
| SAMEA8901307 | ERR6044281 | NA | 2006 | France |
| SAMEA8901308 | ERR6044282 | NA | 2007 | France |
| SAMEA8901309 | ERR6044283 | NA | 2007 | France |
| SAMEA8901310 | ERR6044284 | NA | 2007 | France |
| SAMEA8901311 | ERR6044285 | NA | 2007 | France |
| SAMEA8901312 | ERR6044286 | NA | 2007 | France |
| SAMEA8901313 | ERR6044287 | NA | 2007 | France |
| SAMEA8901314 | ERR6044288 | NA | 2007 | France |
| SAMEA8901315 | ERR6044289 | NA | 2007 | France |
| SAMEA8901316 | ERR6044290 | NA | 2007 | France |
| SAMEA8901317 | ERR6044291 | NA | 2007 | France |
| SAMEA8901318 | ERR6044292 | NA | 2007 | France |
| SAMEA8901319 | ERR6044293 | NA | 2008 | France |
| SAMEA8901320 | ERR6044294 | NA | 2008 | France |
| SAMEA8901321 | ERR6044295 | NA | 2008 | France |
| SAMEA8901322 | ERR6044296 | NA | 2008 | France |
| SAMEA8901323 | ERR6044297 | NA | 2009 | France |
| SAMEA8901324 | ERR6044298 | NA | 2009 | France |
| SAMEA8901325 | ERR6044299 | NA | 2009 | France |
| SAMEA8901326 | ERR6044300 | NA | 2009 | France |
| SAMEA8901327 | ERR6044301 | NA | 2009 | France |
| SAMEA8901328 | ERR6044302 | NA | 2009 | France |
| SAMEA8901329 | ERR6044303 | NA | 2009 | France |
| SAMEA8901330 | ERR6044304 | NA | 2009 | France |
| SAMEA8901331 | ERR6044214 | NA | 2009 | France |
| SAMEA8901332 | ERR6044215 | NA | 2009 | France |
| SAMEA8901333 | ERR6044225 | NA | 2009 | France |
| SAMEA8901334 | ERR6044226 | NA | 2009 | France |
| SAMEA8901335 | ERR6044309 | NA | 2009 | France |
| SAMEA8901336 | ERR6044310 | NA | 2009 | France |
| SAMEA8901337 | ERR6044311 | NA | 2009 | France |
| SAMEA8901338 | ERR6044312 | NA | 2009 | France |
| SAMEA8901339 | ERR6044313 | NA | 2009 | France |
| SAMEA8901340 | ERR6044314 | NA | 2009 | France |
| SAMEA8901341 | ERR6044325 | NA | 2009 | France |
| SAMEA8901342 | ERR6044326 | NA | 2009 | France |
| SAMEA8901343 | ERR6044327 | NA | 2010 | France |
| SAMEA8901344 | ERR6044328 | NA | 2010 | France |
| SAMEA8901345 | ERR6044323 | NA | 2010 | France |
| SAMEA8901346 | ERR6044415 | NA | 2010 | France |
| SAMEA8901347 | ERR6044417 | NA | 2010 | France |

|              |            |    |      |        |
|--------------|------------|----|------|--------|
| SAMEA8901348 | ERR6044416 | NA | 2010 | France |
| SAMEA8901349 | ERR6044418 | NA | 2010 | France |
| SAMEA8901350 | ERR6044420 | NA | 2010 | France |
| SAMEA8901351 | ERR6044422 | NA | 2010 | France |
| SAMEA8901352 | ERR6044545 | NA | 2010 | France |
| SAMEA8901353 | ERR6044419 | NA | 2010 | France |
| SAMEA8901354 | ERR6044329 | NA | 2010 | France |
| SAMEA8901355 | ERR6044330 | NA | 2010 | France |
| SAMEA8901356 | ERR6044331 | NA | 2010 | France |
| SAMEA8901357 | ERR6044332 | NA | 2010 | France |
| SAMEA8901358 | ERR6044333 | NA | 2010 | France |
| SAMEA8901359 | ERR6044334 | NA | 2010 | France |
| SAMEA8901360 | ERR6044335 | NA | 2010 | France |
| SAMEA8901361 | ERR6044336 | NA | 2010 | France |
| SAMEA8901362 | ERR6044337 | NA | 2010 | France |
| SAMEA8901363 | ERR6044338 | NA | 2010 | France |
| SAMEA8901364 | ERR6044339 | NA | 2010 | France |
| SAMEA8901365 | ERR6044340 | NA | 2010 | France |
| SAMEA8901366 | ERR6044341 | NA | 2010 | France |
| SAMEA8901367 | ERR6044342 | NA | 2010 | France |
| SAMEA8901368 | ERR6044343 | NA | 2010 | France |
| SAMEA8901369 | ERR6044344 | NA | 2010 | France |
| SAMEA8901370 | ERR6044345 | NA | 2010 | France |
| SAMEA8901371 | ERR6044346 | NA | 2010 | France |
| SAMEA8901372 | ERR6044347 | NA | 2010 | France |
| SAMEA8901373 | ERR6044348 | NA | 2010 | France |
| SAMEA8901374 | ERR6044349 | NA | 2010 | France |
| SAMEA8901375 | ERR6044350 | NA | 2010 | France |
| SAMEA8901376 | ERR6044351 | NA | 2010 | France |
| SAMEA8901377 | ERR6044352 | NA | 2010 | France |
| SAMEA8901378 | ERR6044353 | NA | 2010 | France |
| SAMEA8901379 | ERR6044354 | NA | 2010 | France |
| SAMEA8901380 | ERR6044355 | NA | 2010 | France |
| SAMEA8901381 | ERR6044356 | NA | 2010 | France |
| SAMEA8901382 | ERR6044357 | NA | 2010 | France |
| SAMEA8901383 | ERR6044358 | NA | 2010 | France |
| SAMEA8901384 | ERR6044359 | NA | 2010 | France |
| SAMEA8901386 | ERR6044361 | NA | 2011 | France |
| SAMEA8901387 | ERR6044362 | NA | 2011 | France |
| SAMEA8901388 | ERR6044363 | NA | 2011 | France |
| SAMEA8901389 | ERR6044364 | NA | 2011 | France |
| SAMEA8901390 | ERR6044365 | NA | 2011 | France |
| SAMEA8901391 | ERR6044366 | NA | 2011 | France |

|              |            |    |      |        |
|--------------|------------|----|------|--------|
| SAMEA8901392 | ERR6044367 | NA | 2011 | France |
| SAMEA8901393 | ERR6044368 | NA | 2011 | France |
| SAMEA8901394 | ERR6044369 | NA | 2011 | France |
| SAMEA8901395 | ERR6044370 | NA | 2011 | France |
| SAMEA8901396 | ERR6044371 | NA | 2011 | France |
| SAMEA8901397 | ERR6044372 | NA | 2011 | France |
| SAMEA8901398 | ERR6044373 | NA | 2011 | France |
| SAMEA8901399 | ERR6044374 | NA | 2011 | France |
| SAMEA8901400 | ERR6044245 | NA | 2011 | France |
| SAMEA8901401 | ERR6044246 | NA | 2011 | France |
| SAMEA8901402 | ERR6044247 | NA | 2011 | France |
| SAMEA8901403 | ERR6044248 | NA | 2011 | France |
| SAMEA8901404 | ERR6044379 | NA | 2011 | France |
| SAMEA8901405 | ERR6044380 | NA | 2011 | France |
| SAMEA8901406 | ERR6044381 | NA | 2011 | France |
| SAMEA8901407 | ERR6044382 | NA | 2011 | France |
| SAMEA8901408 | ERR6044383 | NA | 2011 | France |
| SAMEA8901409 | ERR6044384 | NA | 2011 | France |
| SAMEA8901410 | ERR6044385 | NA | 2011 | France |
| SAMEA8901411 | ERR6044386 | NA | 2011 | France |
| SAMEA8901412 | ERR6044387 | NA | 2011 | France |
| SAMEA8901413 | ERR6044388 | NA | 2011 | France |
| SAMEA8901414 | ERR6044389 | NA | 2011 | France |
| SAMEA8901415 | ERR6044390 | NA | 2011 | France |
| SAMEA8901416 | ERR6044391 | NA | 2011 | France |
| SAMEA8901417 | ERR6044392 | NA | 2011 | France |
| SAMEA8901419 | ERR6044393 | NA | 2011 | France |
| SAMEA8901420 | ERR6044394 | NA | 2011 | France |
| SAMEA8901421 | ERR6044395 | NA | 2011 | France |
| SAMEA8901422 | ERR6044396 | NA | 2011 | France |
| SAMEA8901423 | ERR6044397 | NA | 2011 | France |
| SAMEA8901425 | ERR6044399 | NA | 2011 | France |
| SAMEA8901426 | ERR6044400 | NA | 2011 | France |
| SAMEA8901427 | ERR6044401 | NA | 2011 | France |
| SAMEA8901428 | ERR6044402 | NA | 2011 | France |
| SAMEA8901429 | ERR6044403 | NA | 2011 | France |
| SAMEA8901430 | ERR6044404 | NA | 2011 | France |
| SAMEA8901431 | ERR6044405 | NA | 2011 | France |
| SAMEA8901432 | ERR6044406 | NA | 2011 | France |
| SAMEA8901433 | ERR6044407 | NA | 2011 | France |
| SAMEA8901434 | ERR6044408 | NA | 2011 | France |
| SAMEA8901435 | ERR6044409 | NA | 2011 | France |
| SAMEA8901436 | ERR6044410 | NA | 2011 | France |

|              |            |    |      |        |
|--------------|------------|----|------|--------|
| SAMEA8901437 | ERR6044411 | NA | 2011 | France |
| SAMEA8901438 | ERR6044412 | NA | 2011 | France |
| SAMEA8901439 | ERR6044413 | NA | 2011 | France |
| SAMEA8901440 | ERR6044414 | NA | 2011 | France |
| SAMEA8901441 | ERR6044504 | NA | 2011 | France |
| SAMEA8901442 | ERR6044505 | NA | 2011 | France |
| SAMEA8901443 | ERR6044506 | NA | 2011 | France |
| SAMEA8901444 | ERR6044507 | NA | 2011 | France |
| SAMEA8901445 | ERR6044421 | NA | 2011 | France |
| SAMEA8901446 | ERR6044423 | NA | 2011 | France |
| SAMEA8901447 | ERR6044548 | NA | 2011 | France |
| SAMEA8901448 | ERR6044543 | NA | 2011 | France |
| SAMEA8901449 | ERR6044544 | NA | 2011 | France |
| SAMEA8901450 | ERR6044550 | NA | 2011 | France |
| SAMEA8901451 | ERR6044546 | NA | 2011 | France |
| SAMEA8901452 | ERR6044920 | NA | 2011 | France |
| SAMEA8901453 | ERR6044547 | NA | 2011 | France |
| SAMEA8901454 | ERR6044508 | NA | 2011 | France |
| SAMEA8901455 | ERR6044509 | NA | 2011 | France |
| SAMEA8901456 | ERR6044510 | NA | 2011 | France |
| SAMEA8901457 | ERR6044511 | NA | 2011 | France |
| SAMEA8901458 | ERR6044512 | NA | 2011 | France |
| SAMEA8901459 | ERR6044513 | NA | 2011 | France |
| SAMEA8901460 | ERR6044514 | NA | 2011 | France |
| SAMEA8901461 | ERR6044515 | NA | 2011 | France |
| SAMEA8901462 | ERR6044516 | NA | 2011 | France |
| SAMEA8901463 | ERR6044517 | NA | 2011 | France |
| SAMEA8901464 | ERR6044518 | NA | 2011 | France |
| SAMEA8901465 | ERR6044519 | NA | 2011 | France |
| SAMEA8901466 | ERR6044520 | NA | 2011 | France |
| SAMEA8901467 | ERR6044521 | NA | 2011 | France |
| SAMEA8901468 | ERR6044522 | NA | 2011 | France |
| SAMEA8901469 | ERR6044523 | NA | 2011 | France |
| SAMEA8901470 | ERR6044305 | NA | 2011 | France |
| SAMEA8901471 | ERR6044306 | NA | 2011 | France |
| SAMEA8901472 | ERR6044307 | NA | 2011 | France |
| SAMEA8901473 | ERR6044308 | NA | 2012 | France |
| SAMEA8901474 | ERR6044528 | NA | 2012 | France |
| SAMEA8901475 | ERR6044529 | NA | 2012 | France |
| SAMEA8901476 | ERR6044530 | NA | 2012 | France |
| SAMEA8901477 | ERR6044531 | NA | 2012 | France |
| SAMEA8901478 | ERR6044532 | NA | 2012 | France |
| SAMEA8901479 | ERR6044533 | NA | 2012 | France |

|              |            |    |      |        |
|--------------|------------|----|------|--------|
| SAMEA8901480 | ERR6044534 | NA | 2012 | France |
| SAMEA8901481 | ERR6044535 | NA | 2012 | France |
| SAMEA8901482 | ERR6044536 | NA | 2012 | France |
| SAMEA8901483 | ERR6044537 | NA | 2012 | France |
| SAMEA8901484 | ERR6044538 | NA | 2012 | France |
| SAMEA8901485 | ERR6044539 | NA | 2012 | France |
| SAMEA8901486 | ERR6044540 | NA | 2012 | France |
| SAMEA8901487 | ERR6044541 | NA | 2012 | France |
| SAMEA8901488 | ERR6044542 | NA | 2012 | France |
| SAMEA8901489 | ERR6044600 | NA | 2012 | France |
| SAMEA8901490 | ERR6044601 | NA | 2012 | France |
| SAMEA8901491 | ERR6044602 | NA | 2012 | France |
| SAMEA8901492 | ERR6044603 | NA | 2012 | France |
| SAMEA8901493 | ERR6044549 | NA | 2012 | France |
| SAMEA8901494 | ERR6044551 | NA | 2012 | France |
| SAMEA8901495 | ERR6044922 | NA | 2012 | France |
| SAMEA8901496 | ERR6044921 | NA | 2012 | France |
| SAMEA8901497 | ERR6044923 | NA | 2012 | France |
| SAMEA8901498 | ERR6044924 | NA | 2012 | France |
| SAMEA8901499 | ERR6044925 | NA | 2012 | France |
| SAMEA8901500 | ERR6044926 | NA | 2012 | France |
| SAMEA8901501 | ERR6044927 | NA | 2012 | France |
| SAMEA8901502 | ERR6044966 | NA | 2012 | France |
| SAMEA8901503 | ERR6044928 | NA | 2012 | France |
| SAMEA8901504 | ERR6044968 | NA | 2012 | France |
| SAMEA8901505 | ERR6045017 | NA | 2012 | France |
| SAMEA8901506 | ERR6044775 | NA | 2012 | France |
| SAMEA8901507 | ERR6044962 | NA | 2012 | France |
| SAMEA8901508 | ERR6044913 | NA | 2012 | France |
| SAMEA8901509 | ERR6044963 | NA | 2012 | France |
| SAMEA8901510 | ERR6044964 | NA | 2012 | France |
| SAMEA8901511 | ERR6044965 | NA | 2012 | France |
| SAMEA8901512 | ERR6044934 | NA | 2012 | France |
| SAMEA8901513 | ERR6044935 | NA | 2012 | France |
| SAMEA8901514 | ERR6044936 | NA | 2012 | France |
| SAMEA8901515 | ERR6044937 | NA | 2012 | France |
| SAMEA8901516 | ERR6044938 | NA | 2012 | France |
| SAMEA8901517 | ERR6044939 | NA | 2012 | France |
| SAMEA8901518 | ERR6044940 | NA | 2012 | France |
| SAMEA8901519 | ERR6044941 | NA | 2012 | France |
| SAMEA8901520 | ERR6044942 | NA | 2012 | France |
| SAMEA8901521 | ERR6044943 | NA | 2012 | France |
| SAMEA8901522 | ERR6044944 | NA | 2012 | France |

|              |            |    |      |        |
|--------------|------------|----|------|--------|
| SAMEA8901523 | ERR6044945 | NA | 2012 | France |
| SAMEA8901524 | ERR6044946 | NA | 2012 | France |
| SAMEA8901525 | ERR6044947 | NA | 2012 | France |
| SAMEA8901526 | ERR6044948 | NA | 2012 | France |
| SAMEA8901527 | ERR6044949 | NA | 2012 | France |
| SAMEA8901528 | ERR6044950 | NA | 2012 | France |
| SAMEA8901529 | ERR6044951 | NA | 2012 | France |
| SAMEA8901530 | ERR6044952 | NA | 2012 | France |
| SAMEA8901531 | ERR6044953 | NA | 2012 | France |
| SAMEA8901532 | ERR6044954 | NA | 2012 | France |
| SAMEA8901533 | ERR6044955 | NA | 2012 | France |
| SAMEA8901534 | ERR6044956 | NA | 2012 | France |
| SAMEA8901535 | ERR6044957 | NA | 2012 | France |
| SAMEA8901536 | ERR6044958 | NA | 2012 | France |
| SAMEA8901537 | ERR6044959 | NA | 2012 | France |
| SAMEA8901538 | ERR6044960 | NA | 2012 | France |
| SAMEA8901539 | ERR6044961 | NA | 2012 | France |
| SAMEA8901540 | ERR6044906 | NA | 2012 | France |
| SAMEA8901541 | ERR6044907 | NA | 2012 | France |
| SAMEA8901542 | ERR6044908 | NA | 2012 | France |
| SAMEA8901543 | ERR6044909 | NA | 2012 | France |
| SAMEA8901544 | ERR6044967 | NA | 2012 | France |
| SAMEA8901545 | ERR6044969 | NA | 2012 | France |
| SAMEA8901546 | ERR6044761 | NA | 2012 | France |
| SAMEA8901547 | ERR6044762 | NA | 2012 | France |
| SAMEA8901548 | ERR6044916 | NA | 2012 | France |
| SAMEA8901549 | ERR6044763 | NA | 2012 | France |
| SAMEA8901550 | ERR6044918 | NA | 2012 | France |
| SAMEA8901551 | ERR6044764 | NA | 2012 | France |
| SAMEA8901552 | ERR6044604 | NA | 2012 | France |
| SAMEA8901553 | ERR6044605 | NA | 2012 | France |
| SAMEA8901554 | ERR6044606 | NA | 2012 | France |
| SAMEA8901555 | ERR6044607 | NA | 2012 | France |
| SAMEA8901556 | ERR6044608 | NA | 2012 | France |
| SAMEA8901557 | ERR6044609 | NA | 2012 | France |
| SAMEA8901558 | ERR6044610 | NA | 2012 | France |
| SAMEA8901559 | ERR6044611 | NA | 2012 | France |
| SAMEA8901560 | ERR6044612 | NA | 2012 | France |
| SAMEA8901561 | ERR6044613 | NA | 2012 | France |
| SAMEA8901562 | ERR6044614 | NA | 2012 | France |
| SAMEA8901563 | ERR6044615 | NA | 2012 | France |
| SAMEA8901564 | ERR6044616 | NA | 2012 | France |
| SAMEA8901565 | ERR6044617 | NA | 2012 | France |



|              |            |    |      |        |
|--------------|------------|----|------|--------|
| SAMEA8901566 | ERR6044618 | NA | 2012 | France |
| SAMEA8901567 | ERR6044619 | NA | 2012 | France |
| SAMEA8901568 | ERR6044620 | NA | 2012 | France |
| SAMEA8901569 | ERR6044621 | NA | 2012 | France |
| SAMEA8901570 | ERR6044622 | NA | 2012 | France |
| SAMEA8901571 | ERR6044623 | NA | 2012 | France |
| SAMEA8901572 | ERR6044624 | NA | 2012 | France |
| SAMEA8901573 | ERR6044625 | NA | 2012 | France |
| SAMEA8901574 | ERR6044626 | NA | 2012 | France |
| SAMEA8901575 | ERR6044627 | NA | 2012 | France |
| SAMEA8901578 | ERR6044630 | NA | 2012 | France |
| SAMEA8901579 | ERR6044631 | NA | 2012 | France |
| SAMEA8901580 | ERR6044632 | NA | 2012 | France |
| SAMEA8901582 | ERR6044634 | NA | 2012 | France |
| SAMEA8901584 | ERR6044636 | NA | 2012 | France |
| SAMEA8901585 | ERR6044637 | NA | 2012 | France |
| SAMEA8901586 | ERR6044638 | NA | 2012 | France |
| SAMEA8901587 | ERR6044639 | NA | 2012 | France |
| SAMEA8901588 | ERR6044640 | NA | 2012 | France |
| SAMEA8901589 | ERR6044375 | NA | 2012 | France |
| SAMEA8901590 | ERR6044376 | NA | 2012 | France |
| SAMEA8901591 | ERR6044377 | NA | 2012 | France |
| SAMEA8901592 | ERR6044378 | NA | 2012 | France |
| SAMEA8901593 | ERR6044645 | NA | 2012 | France |
| SAMEA8901594 | ERR6044646 | NA | 2012 | France |
| SAMEA8901595 | ERR6044647 | NA | 2012 | France |
| SAMEA8901596 | ERR6044648 | NA | 2012 | France |
| SAMEA8901597 | ERR6044649 | NA | 2012 | France |
| SAMEA8901598 | ERR6044650 | NA | 2012 | France |
| SAMEA8901599 | ERR6044651 | NA | 2012 | France |
| SAMEA8901600 | ERR6044652 | NA | 2012 | France |
| SAMEA8901601 | ERR6044653 | NA | 2012 | France |
| SAMEA8901602 | ERR6044654 | NA | 2012 | France |
| SAMEA8901603 | ERR6044655 | NA | 2012 | France |
| SAMEA8901604 | ERR6044656 | NA | 2013 | France |
| SAMEA8901605 | ERR6044657 | NA | 2013 | France |
| SAMEA8901606 | ERR6044658 | NA | 2013 | France |
| SAMEA8901607 | ERR6044659 | NA | 2013 | France |
| SAMEA8901608 | ERR6044660 | NA | 2013 | France |
| SAMEA8901609 | ERR6044661 | NA | 2013 | France |
| SAMEA8901610 | ERR6044662 | NA | 2013 | France |
| SAMEA8901611 | ERR6044663 | NA | 2013 | France |
| SAMEA8901612 | ERR6044664 | NA | 2013 | France |

|              |            |    |      |        |
|--------------|------------|----|------|--------|
| SAMEA8901613 | ERR6044665 | NA | 2013 | France |
| SAMEA8901614 | ERR6044666 | NA | 2013 | France |
| SAMEA8901615 | ERR6044667 | NA | 2013 | France |
| SAMEA8901616 | ERR6044668 | NA | 2013 | France |
| SAMEA8901617 | ERR6044669 | NA | 2013 | France |
| SAMEA8901618 | ERR6044670 | NA | 2013 | France |
| SAMEA8901619 | ERR6044671 | NA | 2013 | France |
| SAMEA8901620 | ERR6044672 | NA | 2013 | France |
| SAMEA8901621 | ERR6044673 | NA | 2013 | France |
| SAMEA8901622 | ERR6044674 | NA | 2013 | France |
| SAMEA8901623 | ERR6044675 | NA | 2013 | France |
| SAMEA8901624 | ERR6044676 | NA | 2013 | France |
| SAMEA8901625 | ERR6044677 | NA | 2013 | France |
| SAMEA8901626 | ERR6044678 | NA | 2013 | France |
| SAMEA8901627 | ERR6044679 | NA | 2013 | France |
| SAMEA8901628 | ERR6044680 | NA | 2013 | France |
| SAMEA8901629 | ERR6044681 | NA | 2013 | France |
| SAMEA8901630 | ERR6044682 | NA | 2013 | France |
| SAMEA8901631 | ERR6044683 | NA | 2013 | France |
| SAMEA8901632 | ERR6044684 | NA | 2013 | France |
| SAMEA8901633 | ERR6044685 | NA | 2013 | France |
| SAMEA8901634 | ERR6044686 | NA | 2013 | France |
| SAMEA8901635 | ERR6044687 | NA | 2013 | France |
| SAMEA8901636 | ERR6044688 | NA | 2013 | France |
| SAMEA8901637 | ERR6044689 | NA | 2013 | France |
| SAMEA8901638 | ERR6044690 | NA | 2013 | France |
| SAMEA8901639 | ERR6044691 | NA | 2013 | France |
| SAMEA8901640 | ERR6044692 | NA | 2013 | France |
| SAMEA8901641 | ERR6044693 | NA | 2013 | France |
| SAMEA8901642 | ERR6044694 | NA | 2013 | France |
| SAMEA8901643 | ERR6044695 | NA | 2013 | France |
| SAMEA8901644 | ERR6044696 | NA | 2013 | France |
| SAMEA8901645 | ERR6044697 | NA | 2013 | France |
| SAMEA8901646 | ERR6044698 | NA | 2013 | France |
| SAMEA8901647 | ERR6044699 | NA | 2013 | France |
| SAMEA8901648 | ERR6044700 | NA | 2013 | France |
| SAMEA8901649 | ERR6044524 | NA | 2013 | France |
| SAMEA8901650 | ERR6044525 | NA | 2013 | France |
| SAMEA8901651 | ERR6044526 | NA | 2013 | France |
| SAMEA8901652 | ERR6044527 | NA | 2013 | France |
| SAMEA8901653 | ERR6044705 | NA | 2013 | France |
| SAMEA8901654 | ERR6044706 | NA | 2013 | France |
| SAMEA8901655 | ERR6044707 | NA | 2013 | France |

|              |            |    |      |        |
|--------------|------------|----|------|--------|
| SAMEA8901656 | ERR6044708 | NA | 2013 | France |
| SAMEA8901657 | ERR6044709 | NA | 2013 | France |
| SAMEA8901658 | ERR6044710 | NA | 2013 | France |
| SAMEA8901659 | ERR6044711 | NA | 2013 | France |
| SAMEA8901660 | ERR6044712 | NA | 2013 | France |
| SAMEA8901661 | ERR6044713 | NA | 2013 | France |
| SAMEA8901662 | ERR6044714 | NA | 2013 | France |
| SAMEA8901663 | ERR6044715 | NA | 2013 | France |
| SAMEA8901664 | ERR6044716 | NA | 2013 | France |
| SAMEA8901665 | ERR6044717 | NA | 2013 | France |
| SAMEA8901666 | ERR6044718 | NA | 2013 | France |
| SAMEA8901667 | ERR6044719 | NA | 2013 | France |
| SAMEA8901668 | ERR6044720 | NA | 2013 | France |
| SAMEA8901669 | ERR6044721 | NA | 2013 | France |
| SAMEA8901670 | ERR6044722 | NA | 2013 | France |
| SAMEA8901671 | ERR6044723 | NA | 2013 | France |
| SAMEA8901672 | ERR6044724 | NA | 2013 | France |
| SAMEA8901673 | ERR6044725 | NA | 2013 | France |
| SAMEA8901674 | ERR6044726 | NA | 2013 | France |
| SAMEA8901675 | ERR6044727 | NA | 2013 | France |
| SAMEA8901676 | ERR6044728 | NA | 2013 | France |
| SAMEA8901677 | ERR6044729 | NA | 2013 | France |
| SAMEA8901678 | ERR6044730 | NA | 2013 | France |
| SAMEA8901679 | ERR6044731 | NA | 2013 | France |
| SAMEA8901680 | ERR6044732 | NA | 2013 | France |
| SAMEA8901681 | ERR6044733 | NA | 2013 | France |
| SAMEA8901682 | ERR6044734 | NA | 2013 | France |
| SAMEA8901683 | ERR6044735 | NA | 2013 | France |
| SAMEA8901684 | ERR6044736 | NA | 2013 | France |
| SAMEA8901685 | ERR6044737 | NA | 2013 | France |
| SAMEA8901686 | ERR6044738 | NA | 2013 | France |
| SAMEA8901687 | ERR6044739 | NA | 2013 | France |
| SAMEA8901688 | ERR6044740 | NA | 2013 | France |
| SAMEA8901689 | ERR6044741 | NA | 2013 | France |
| SAMEA8901690 | ERR6044742 | NA | 2013 | France |
| SAMEA8901691 | ERR6044743 | NA | 2013 | France |
| SAMEA8901692 | ERR6044744 | NA | 2013 | France |
| SAMEA8901693 | ERR6044745 | NA | 2013 | France |
| SAMEA8901694 | ERR6044746 | NA | 2013 | France |
| SAMEA8901695 | ERR6044747 | NA | 2013 | France |
| SAMEA8901696 | ERR6044748 | NA | 2013 | France |
| SAMEA8901697 | ERR6044749 | NA | 2013 | France |
| SAMEA8901698 | ERR6044750 | NA | 2013 | France |

|              |            |    |      |        |
|--------------|------------|----|------|--------|
| SAMEA8901699 | ERR6044751 | NA | 2013 | France |
| SAMEA8901700 | ERR6044752 | NA | 2013 | France |
| SAMEA8901701 | ERR6044753 | NA | 2013 | France |
| SAMEA8901702 | ERR6044754 | NA | 2013 | France |
| SAMEA8901703 | ERR6044755 | NA | 2013 | France |
| SAMEA8901704 | ERR6044756 | NA | 2013 | France |
| SAMEA8901705 | ERR6044757 | NA | 2013 | France |
| SAMEA8901706 | ERR6044758 | NA | 2013 | France |
| SAMEA8901707 | ERR6044759 | NA | 2013 | France |
| SAMEA8901708 | ERR6044760 | NA | 2013 | France |
| SAMEA8901709 | ERR6044641 | NA | 2013 | France |
| SAMEA8901710 | ERR6044642 | NA | 2013 | France |
| SAMEA8901711 | ERR6044643 | NA | 2013 | France |
| SAMEA8901712 | ERR6044644 | NA | 2013 | France |
| SAMEA8901713 | ERR6044765 | NA | 2013 | France |
| SAMEA8901714 | ERR6044766 | NA | 2013 | France |
| SAMEA8901715 | ERR6044767 | NA | 2013 | France |
| SAMEA8901716 | ERR6044768 | NA | 2013 | France |
| SAMEA8901717 | ERR6044769 | NA | 2013 | France |
| SAMEA8901718 | ERR6044770 | NA | 2013 | France |
| SAMEA8901719 | ERR6044771 | NA | 2013 | France |
| SAMEA8901720 | ERR6044772 | NA | 2013 | France |
| SAMEA8901721 | ERR6044773 | NA | 2013 | France |
| SAMEA8901722 | ERR6044774 | NA | 2013 | France |
| SAMEA8901723 | ERR6044776 | NA | 2013 | France |
| SAMEA8901724 | ERR6044777 | NA | 2014 | France |
| SAMEA8901725 | ERR6044912 | NA | 2014 | France |
| SAMEA8901726 | ERR6044914 | NA | 2014 | France |
| SAMEA8901727 | ERR6044084 | NA | 2014 | France |
| SAMEA8901728 | ERR6044915 | NA | 2014 | France |
| SAMEA8901729 | ERR6044917 | NA | 2014 | France |
| SAMEA8901730 | ERR6044782 | NA | 2014 | France |
| SAMEA8901731 | ERR6044783 | NA | 2014 | France |
| SAMEA8901732 | ERR6044784 | NA | 2014 | France |
| SAMEA8901733 | ERR6044785 | NA | 2014 | France |
| SAMEA8901734 | ERR6044098 | NA | 2014 | France |
| SAMEA8901735 | ERR6044099 | NA | 2014 | France |
| SAMEA8901736 | ERR6044100 | NA | 2014 | France |
| SAMEA8901737 | ERR6044101 | NA | 2014 | France |
| SAMEA8901738 | ERR6044790 | NA | 2014 | France |
| SAMEA8901739 | ERR6044791 | NA | 2014 | France |
| SAMEA8901740 | ERR6044792 | NA | 2014 | France |
| SAMEA8901741 | ERR6044793 | NA | 2014 | France |

|              |            |    |      |        |
|--------------|------------|----|------|--------|
| SAMEA8901742 | ERR6044794 | NA | 2014 | France |
| SAMEA8901743 | ERR6044795 | NA | 2014 | France |
| SAMEA8901744 | ERR6044796 | NA | 2014 | France |
| SAMEA8901745 | ERR6044797 | NA | 2014 | France |
| SAMEA8901746 | ERR6044798 | NA | 2014 | France |
| SAMEA8901747 | ERR6044799 | NA | 2014 | France |
| SAMEA8901748 | ERR6044800 | NA | 2014 | France |
| SAMEA8901749 | ERR6044801 | NA | 2014 | France |
| SAMEA8901750 | ERR6044802 | NA | 2014 | France |
| SAMEA8901751 | ERR6044803 | NA | 2014 | France |
| SAMEA8901752 | ERR6044804 | NA | 2014 | France |
| SAMEA8901753 | ERR6044805 | NA | 2014 | France |
| SAMEA8901754 | ERR6044806 | NA | 2014 | France |
| SAMEA8901755 | ERR6044807 | NA | 2014 | France |
| SAMEA8901756 | ERR6044808 | NA | 2014 | France |
| SAMEA8901757 | ERR6044809 | NA | 2014 | France |
| SAMEA8901758 | ERR6044810 | NA | 2014 | France |
| SAMEA8901759 | ERR6044811 | NA | 2014 | France |
| SAMEA8901760 | ERR6044812 | NA | 2014 | France |
| SAMEA8901761 | ERR6044813 | NA | 2014 | France |
| SAMEA8901762 | ERR6044814 | NA | 2014 | France |
| SAMEA8901763 | ERR6044815 | NA | 2014 | France |
| SAMEA8901764 | ERR6044816 | NA | 2014 | France |
| SAMEA8901765 | ERR6044817 | NA | 2014 | France |
| SAMEA8901766 | ERR6044818 | NA | 2014 | France |
| SAMEA8901767 | ERR6044819 | NA | 2014 | France |
| SAMEA8901768 | ERR6044820 | NA | 2014 | France |
| SAMEA8901769 | ERR6044821 | NA | 2014 | France |
| SAMEA8901770 | ERR6044822 | NA | 2014 | France |
| SAMEA8901771 | ERR6044823 | NA | 2014 | France |
| SAMEA8901772 | ERR6044824 | NA | 2014 | France |
| SAMEA8901773 | ERR6044825 | NA | 2014 | France |
| SAMEA8901774 | ERR6044826 | NA | 2014 | France |
| SAMEA8901775 | ERR6044827 | NA | 2014 | France |
| SAMEA8901776 | ERR6044828 | NA | 2014 | France |
| SAMEA8901777 | ERR6044829 | NA | 2014 | France |
| SAMEA8901778 | ERR6044830 | NA | 2014 | France |
| SAMEA8901779 | ERR6044831 | NA | 2015 | France |
| SAMEA8901780 | ERR6044832 | NA | 2015 | France |
| SAMEA8901781 | ERR6044833 | NA | 2015 | France |
| SAMEA8901782 | ERR6044834 | NA | 2015 | France |
| SAMEA8901783 | ERR6044835 | NA | 2015 | France |
| SAMEA8901784 | ERR6044836 | NA | 2015 | France |

|              |            |    |      |        |
|--------------|------------|----|------|--------|
| SAMEA8901785 | ERR6044837 | NA | 2016 | France |
| SAMEA8901786 | ERR6044838 | NA | 2016 | France |
| SAMEA8901787 | ERR6044839 | NA | 2016 | France |
| SAMEA8901788 | ERR6044840 | NA | 2016 | France |
| SAMEA8901789 | ERR6044841 | NA | 2016 | France |
| SAMEA8901790 | ERR6044842 | NA | 2016 | France |
| SAMEA8901791 | ERR6044843 | NA | 2016 | France |
| SAMEA8901793 | ERR6044845 | NA | 2016 | France |
| SAMEA8901795 | ERR6044163 | NA | 2016 | France |
| SAMEA8901796 | ERR6044164 | NA | 2016 | France |
| SAMEA8901797 | ERR6044165 | NA | 2016 | France |
| SAMEA8901798 | ERR6044850 | NA | 2016 | France |
| SAMEA8901799 | ERR6044851 | NA | 2016 | France |
| SAMEA8901800 | ERR6044852 | NA | 2016 | France |
| SAMEA8901801 | ERR6044853 | NA | 2017 | France |
| SAMEA8901802 | ERR6044854 | NA | 2017 | France |
| SAMEA8901803 | ERR6044855 | NA | 2017 | France |
| SAMEA8901804 | ERR6044856 | NA | 2017 | France |
| SAMEA8901805 | ERR6044857 | NA | 2017 | France |
| SAMEA8901806 | ERR6044858 | NA | 2017 | France |
| SAMEA8901807 | ERR6044859 | NA | 2017 | France |
| SAMEA8901808 | ERR6044860 | NA | 2017 | France |
| SAMEA8901809 | ERR6044861 | NA | 2017 | France |
| SAMEA8901810 | ERR6044862 | NA | 2017 | France |
| SAMEA8901811 | ERR6044863 | NA | 2017 | France |
| SAMEA8901812 | ERR6044864 | NA | 2017 | France |
| SAMEA8901813 | ERR6044865 | NA | 2017 | France |
| SAMEA8901814 | ERR6044866 | NA | 2017 | France |
| SAMEA8901815 | ERR6044867 | NA | 2017 | France |
| SAMEA8901816 | ERR6044868 | NA | 2017 | France |
| SAMEA8901817 | ERR6044869 | NA | 2017 | France |
| SAMEA8901818 | ERR6044870 | NA | 2017 | France |
| SAMEA8901819 | ERR6044871 | NA | 2017 | France |
| SAMEA8901820 | ERR6044872 | NA | 2017 | France |
| SAMEA8901821 | ERR6044873 | NA | 2017 | France |
| SAMEA8901822 | ERR6044874 | NA | 2017 | France |
| SAMEA8901823 | ERR6044875 | NA | 2017 | France |
| SAMEA8901824 | ERR6044876 | NA | 2017 | France |
| SAMEA8901825 | ERR6044877 | NA | 2017 | France |
| SAMEA8901826 | ERR6044878 | NA | 2017 | France |
| SAMEA8901827 | ERR6044879 | NA | 2017 | France |
| SAMEA8901828 | ERR6044880 | NA | 2017 | France |
| SAMEA8901829 | ERR6044881 | NA | 2017 | France |

|              |            |    |      |         |
|--------------|------------|----|------|---------|
| SAMEA8901830 | ERR6044882 | NA | 2017 | France  |
| SAMEA8901831 | ERR6044883 | NA | 2017 | France  |
| SAMEA8901832 | ERR6044884 | NA | 2017 | France  |
| SAMEA8901833 | ERR6044885 | NA | 2017 | France  |
| SAMEA8901834 | ERR6044886 | NA | 2017 | France  |
| SAMEA8901835 | ERR6044887 | NA | 2018 | France  |
| SAMEA8901836 | ERR6044888 | NA | 2018 | France  |
| SAMEA8901837 | ERR6044889 | NA | 2018 | France  |
| SAMEA8901838 | ERR6044890 | NA | 2018 | France  |
| SAMEA8901839 | ERR6044891 | NA | 2018 | France  |
| SAMEA8901840 | ERR6044892 | NA | 2018 | France  |
| SAMEA8901841 | ERR6044893 | NA | 2018 | France  |
| SAMEA8901842 | ERR6044894 | NA | 2018 | France  |
| SAMEA8901843 | ERR6044895 | NA | 2018 | France  |
| SAMEA8901844 | ERR6044896 | NA | 2018 | France  |
| SAMEA8901845 | ERR6044897 | NA | 2018 | France  |
| SAMEA8901846 | ERR6044898 | NA | 2018 | France  |
| SAMEA8901847 | ERR6044899 | NA | 2018 | France  |
| SAMEA8901848 | ERR6044900 | NA | 2018 | France  |
| SAMEA8901849 | ERR6044901 | NA | 2018 | France  |
| SAMEA8901850 | ERR6044902 | NA | 2018 | France  |
| SAMEA8901851 | ERR6044903 | NA | 2018 | France  |
| SAMEA8901852 | ERR6044904 | NA | 2018 | France  |
| SAMEA8901853 | ERR6044905 | NA | 2018 | France  |
| SAMEA8901854 | ERR6044786 | NA | 2018 | France  |
| SAMEA8901855 | ERR6044787 | NA | 2018 | France  |
| SAMEA8901856 | ERR6044788 | NA | 2018 | France  |
| SAMEA8901857 | ERR6044789 | NA | 2018 | France  |
| SAMEA8901858 | ERR6044910 | NA | 2018 | France  |
| SAMEA8901859 | ERR6044911 | NA | 2018 | France  |
| SAMEA8901860 | ERR6044846 | NA | 2018 | France  |
| SAMEA8901861 | ERR6044847 | NA | 2018 | France  |
| SAMEA8901862 | ERR6044848 | NA | 2018 | France  |
| SAMEA8901863 | ERR6044849 | NA | 2018 | France  |
| SAMEA8901864 | ERR6044919 | NA | 2018 | France  |
| SAMEA8901865 | ERR6044086 | NA | 2018 | France  |
| SAMEA8901866 | ERR6044701 | NA | 2018 | France  |
| SAMEA8901867 | ERR6044702 | NA | 2018 | France  |
| SAMEA8901868 | ERR6044123 | NA | 2018 | France  |
| SAMEA8901869 | ERR6044703 | NA | 2018 | France  |
| SAMEA8901870 | ERR6044125 | NA | 2018 | France  |
| SAMEA8901871 | ERR6044704 | NA | 2019 | France  |
| SAMEA8914353 | ERR6091452 | NA | 2014 | Belgium |

|              |             |    |      |                |
|--------------|-------------|----|------|----------------|
| SAMEA8914354 | ERR6091453  | NA | 2014 | Belgium        |
| SAMEA8914355 | ERR6091454  | NA | 2014 | Belgium        |
| SAMEA8914356 | ERR6091455  | NA | 2015 | Belgium        |
| SAMEA8914357 | ERR6091456  | NA | 2015 | Belgium        |
| SAMEA8914358 | ERR6091457  | NA | 2015 | Belgium        |
| SAMEA8914359 | ERR6091458  | NA | 2015 | Belgium        |
| SAMEA8914360 | ERR6091459  | NA | 2015 | Belgium        |
| SAMEA8914361 | ERR6091460  | NA | 2015 | Belgium        |
| SAMEA8914362 | ERR6091461  | NA | 2015 | Belgium        |
| SAMEA8914363 | ERR6091462  | NA | 2015 | Belgium        |
| SAMEA8914364 | ERR6091463  | NA | 2015 | Belgium        |
| SAMEA8914365 | ERR6091464  | NA | 2015 | Belgium        |
| SAMEA8914366 | ERR6091465  | NA | 2016 | Belgium        |
| SAMEA8914367 | ERR6091466  | NA | 2016 | Belgium        |
| SAMEA8914368 | ERR6091467  | NA | 2016 | Belgium        |
| SAMEA8914369 | ERR6091468  | NA | 2016 | Belgium        |
| SAMEA8914370 | ERR6091469  | NA | 2016 | Belgium        |
| SAMEA8914371 | ERR6091470  | NA | 2016 | Belgium        |
| SAMEA8914372 | ERR6091471  | NA | 2016 | Belgium        |
| SAMEA8914373 | ERR6091472  | NA | 2016 | Belgium        |
| SAMEA8914374 | ERR6091737  | NA | 2016 | Belgium        |
| SAMEA8914375 | ERR6091738  | NA | 2016 | Belgium        |
| SAMEA8914376 | ERR6091739  | NA | 2015 | Czech_Republic |
| SAMEA8914377 | ERR6091740  | NA | 2015 | Czech_Republic |
| SAMEA8914378 | ERR6091741  | NA | 2016 | Czech_Republic |
| SAMEA8914379 | ERR6091742  | NA | 2014 | Czech_Republic |
| SAMEA8914380 | ERR6091743  | NA | 2016 | Czech_Republic |
| SAMEA8914381 | ERR6091744  | NA | 2014 | Czech_Republic |
| SAMEA8914382 | ERR6091745  | NA | 2014 | Czech_Republic |
| SAMEA8914383 | ERR6091746  | NA | 2014 | Czech_Republic |
| SAMEA8914384 | ERR6091747  | NA | 2015 | Czech_Republic |
| SAMEA8914385 | ERR6091748  | NA | 2014 | Czech_Republic |
| SAMEA8914386 | ERR6091749  | NA | 2014 | Czech_Republic |
| SAMEA8914387 | ERR6091750  | NA | 2016 | Czech_Republic |
| SAMEA8914388 | ERR6091751  | NA | 2014 | Czech_Republic |
| SAMEA8914389 | ERR6091752  | NA | 2014 | Czech_Republic |
| SAMEA8914390 | ERR6091753  | NA | 2014 | Czech_Republic |
| SAMEA8914392 | SRR17115542 | NA | 2014 | Czech_Republic |
| SAMEA8914393 | ERR6091756  | NA | 2014 | Czech_Republic |
| SAMEA8914394 | ERR6091757  | NA | 2014 | Czech_Republic |
| SAMEA8914395 | ERR6091758  | NA | 2016 | Czech_Republic |
| SAMEA8914396 | ERR6091759  | NA | 2014 | Czech_Republic |
| SAMEA8914397 | ERR6091760  | NA | 2014 | Czech_Republic |



|              |            |    |      |                |
|--------------|------------|----|------|----------------|
| SAMEA8914398 | ERR6092194 | NA | 2014 | Czech_Republic |
| SAMEA8914399 | ERR6092195 | NA | 2014 | Czech_Republic |
| SAMEA8914400 | ERR6092196 | NA | 2016 | Denmark        |
| SAMEA8914401 | ERR6092197 | NA | 2016 | Denmark        |
| SAMEA8914402 | ERR6092198 | NA | 2015 | Denmark        |
| SAMEA8914403 | ERR6092199 | NA | 2015 | Denmark        |
| SAMEA8914406 | ERR6092202 | NA | 2016 | Denmark        |
| SAMEA8914407 | ERR6092203 | NA | 2014 | Denmark        |
| SAMEA8914408 | ERR6092204 | NA | 2015 | Denmark        |
| SAMEA8914409 | ERR6092205 | NA | 2016 | Denmark        |
| SAMEA8914410 | ERR6092206 | NA | 2016 | Denmark        |
| SAMEA8914411 | ERR6092207 | NA | 2016 | Denmark        |
| SAMEA8914412 | ERR6092208 | NA | 2015 | Denmark        |
| SAMEA8914413 | ERR6092209 | NA | 2016 | Denmark        |
| SAMEA8914414 | ERR6096244 | NA | 2016 | Denmark        |
| SAMEA8914415 | ERR6096245 | NA | 2015 | Denmark        |
| SAMEA8914416 | ERR6096246 | NA | 2014 | Spain          |
| SAMEA8914417 | ERR6096247 | NA | 2014 | Spain          |
| SAMEA8914418 | ERR6096248 | NA | 2014 | Spain          |
| SAMEA8914419 | ERR6096249 | NA | 2014 | Spain          |
| SAMEA8914420 | ERR6096250 | NA | 2014 | Spain          |
| SAMEA8914421 | ERR6096251 | NA | 2014 | Spain          |
| SAMEA8914422 | ERR6096252 | NA | 2014 | Spain          |
| SAMEA8914423 | ERR6096253 | NA | 2014 | Spain          |
| SAMEA8914424 | ERR6096254 | NA | 2014 | Spain          |
| SAMEA8914425 | ERR6096255 | NA | 2014 | Spain          |
| SAMEA8914426 | ERR6096256 | NA | 2015 | Spain          |
| SAMEA8914427 | ERR6096257 | NA | 2015 | Spain          |
| SAMEA8914428 | ERR6096258 | NA | 2015 | Spain          |
| SAMEA8914429 | ERR6096259 | NA | 2015 | Spain          |
| SAMEA8914430 | ERR6096260 | NA | 2015 | Spain          |
| SAMEA8914431 | ERR6096261 | NA | 2015 | Spain          |
| SAMEA8914432 | ERR6096262 | NA | 2015 | Spain          |
| SAMEA8914433 | ERR6096263 | NA | 2015 | Spain          |
| SAMEA8914434 | ERR6096264 | NA | 2015 | Spain          |
| SAMEA8914435 | ERR6096265 | NA | 2015 | Spain          |
| SAMEA8914436 | ERR6096266 | NA | 2016 | Spain          |
| SAMEA8914437 | ERR6096267 | NA | 2016 | Spain          |
| SAMEA8914438 | ERR6096268 | NA | 2016 | Spain          |
| SAMEA8914440 | ERR6096270 | NA | 2016 | Spain          |
| SAMEA8914442 | ERR6096272 | NA | 2016 | Spain          |
| SAMEA8914445 | ERR6096275 | NA | 2016 | Spain          |
| SAMEA8914446 | ERR6096276 | NA | 2014 | Finland        |

|              |            |    |      |         |
|--------------|------------|----|------|---------|
| SAMEA8914450 | ERR6096280 | NA | 2014 | Finland |
| SAMEA8914452 | ERR6091443 | NA | 2014 | Finland |
| SAMEA8914453 | ERR6096283 | NA | 2014 | Finland |
| SAMEA8914454 | ERR6096284 | NA | 2014 | Finland |
| SAMEA8914455 | ERR6096285 | NA | 2015 | Finland |
| SAMEA8914456 | ERR6096286 | NA | 2015 | Finland |
| SAMEA8914457 | ERR6096287 | NA | 2015 | Finland |
| SAMEA8914458 | ERR6096288 | NA | 2015 | Finland |
| SAMEA8914459 | ERR6096289 | NA | 2016 | Finland |
| SAMEA8914460 | ERR6096290 | NA | 2016 | Finland |
| SAMEA8914461 | ERR6096291 | NA | 2016 | Finland |
| SAMEA8914462 | ERR6096292 | NA | 2016 | Finland |
| SAMEA8914464 | ERR6096294 | NA | 2016 | Finland |
| SAMEA8914465 | ERR6096295 | NA | 2016 | Finland |
| SAMEA8914466 | ERR6096296 | NA | 2016 | Finland |
| SAMEA8914467 | ERR6096297 | NA | 2016 | Finland |
| SAMEA8914468 | ERR6096298 | NA | 2016 | Finland |
| SAMEA8914469 | ERR6096299 | NA | 2016 | Finland |
| SAMEA8914470 | ERR6096300 | NA | 2016 | Finland |
| SAMEA8914471 | ERR6096301 | NA | 2016 | Finland |
| SAMEA8914472 | ERR6096302 | NA | 2016 | Finland |
| SAMEA8914473 | ERR6096303 | NA | 2016 | Finland |
| SAMEA8914474 | ERR6096304 | NA | 2016 | Finland |
| SAMEA8914475 | ERR6096305 | NA | 2016 | Finland |
| SAMEA8914476 | ERR6096306 | NA | 2014 | Ireland |
| SAMEA8914477 | ERR6096307 | NA | 2014 | Ireland |
| SAMEA8914478 | ERR6096308 | NA | 2014 | Ireland |
| SAMEA8914479 | ERR6096309 | NA | 2014 | Ireland |
| SAMEA8914480 | ERR6096310 | NA | 2014 | Ireland |
| SAMEA8914481 | ERR6096311 | NA | 2014 | Ireland |
| SAMEA8914482 | ERR6096312 | NA | 2014 | Ireland |
| SAMEA8914483 | ERR6096313 | NA | 2014 | Ireland |
| SAMEA8914484 | ERR6096314 | NA | 2014 | Ireland |
| SAMEA8914485 | ERR6096315 | NA | 2014 | Ireland |
| SAMEA8914486 | ERR6096316 | NA | 2014 | Ireland |
| SAMEA8914487 | ERR6096317 | NA | 2015 | Ireland |
| SAMEA8914488 | ERR6096318 | NA | 2015 | Ireland |
| SAMEA8914489 | ERR6096319 | NA | 2015 | Ireland |
| SAMEA8914490 | ERR6096320 | NA | 2015 | Ireland |
| SAMEA8914491 | ERR6096321 | NA | 2015 | Ireland |
| SAMEA8914492 | ERR6096322 | NA | 2015 | Ireland |
| SAMEA8914494 | ERR6096324 | NA | 2016 | Ireland |
| SAMEA8914495 | ERR6096325 | NA | 2016 | Ireland |

|              |            |    |      |             |
|--------------|------------|----|------|-------------|
| SAMEA8914496 | ERR6096326 | NA | 2016 | Ireland     |
| SAMEA8914497 | ERR6096327 | NA | 2016 | Ireland     |
| SAMEA8914498 | ERR6096328 | NA | 2016 | Ireland     |
| SAMEA8914499 | ERR6096329 | NA | 2016 | Ireland     |
| SAMEA8914500 | ERR6096330 | NA | 2016 | Ireland     |
| SAMEA8914501 | ERR6096331 | NA | 2016 | Ireland     |
| SAMEA8914502 | ERR6096332 | NA | 2016 | Ireland     |
| SAMEA8914503 | ERR6096333 | NA | 2016 | Ireland     |
| SAMEA8914504 | ERR6096334 | NA | 2016 | Ireland     |
| SAMEA8914505 | ERR6096335 | NA | 2016 | Ireland     |
| SAMEA8914506 | ERR6096336 | NA | 2016 | Ireland     |
| SAMEA8914507 | ERR6096337 | NA | 2016 | Ireland     |
| SAMEA8914508 | ERR6096338 | NA | 2016 | Ireland     |
| SAMEA8914509 | ERR6096339 | NA | 2016 | Ireland     |
| SAMEA8914510 | ERR6096340 | NA | 2016 | Ireland     |
| SAMEA8914511 | ERR6091754 | NA | 2016 | Ireland     |
| SAMEA8914512 | ERR6091755 | NA | 2016 | Ireland     |
| SAMEA8914513 | ERR6096343 | NA | 2016 | Ireland     |
| SAMEA8914514 | ERR6096344 | NA | 2016 | Ireland     |
| SAMEA8914515 | ERR6096389 | NA | 2016 | Ireland     |
| SAMEA8914516 | ERR6096390 | NA | 2016 | Ireland     |
| SAMEA8914517 | ERR6097520 | NA | 2014 | Italy       |
| SAMEA8914518 | ERR6097521 | NA | 2015 | Italy       |
| SAMEA8914519 | ERR6097522 | NA | 2014 | Italy       |
| SAMEA8914520 | ERR6097523 | NA | 2014 | Italy       |
| SAMEA8914521 | ERR6097524 | NA | 2014 | Italy       |
| SAMEA8914522 | ERR6097525 | NA | 2016 | Italy       |
| SAMEA8914523 | ERR6097526 | NA | 2016 | Italy       |
| SAMEA8914525 | ERR6097528 | NA | 2016 | Italy       |
| SAMEA8914526 | ERR6097529 | NA | 2016 | Italy       |
| SAMEA8914527 | ERR6097530 | NA | 2016 | Italy       |
| SAMEA8914529 | ERR6097532 | NA | 2016 | Italy       |
| SAMEA8914530 | ERR6097533 | NA | 2016 | Italy       |
| SAMEA8914531 | ERR6097534 | NA | 2016 | Italy       |
| SAMEA8914532 | ERR6097535 | NA | 2016 | Italy       |
| SAMEA8914533 | ERR6097536 | NA | 2016 | Italy       |
| SAMEA8914537 | ERR6097540 | NA | 2016 | Italy       |
| SAMEA8914538 | ERR6097541 | NA | 2016 | Italy       |
| SAMEA8914539 | ERR6097542 | NA | 2014 | Italy       |
| SAMEA8914541 | ERR6097544 | NA | 2014 | Italy       |
| SAMEA8914545 | ERR6096530 | NA | 2014 | Italy       |
| SAMEA8914546 | ERR6096391 | NA | 2014 | Netherlands |
| SAMEA8914547 | ERR6096392 | NA | 2014 | Netherlands |

|              |            |    |      |             |
|--------------|------------|----|------|-------------|
| SAMEA8914548 | ERR6096393 | NA | 2014 | Netherlands |
| SAMEA8914549 | ERR6096394 | NA | 2014 | Netherlands |
| SAMEA8914550 | ERR6096395 | NA | 2014 | Netherlands |
| SAMEA8914551 | ERR6096396 | NA | 2014 | Netherlands |
| SAMEA8914552 | ERR6096397 | NA | 2014 | Netherlands |
| SAMEA8914554 | ERR6096399 | NA | 2014 | Netherlands |
| SAMEA8914555 | ERR6096400 | NA | 2014 | Netherlands |
| SAMEA8914556 | ERR6096401 | NA | 2015 | Netherlands |
| SAMEA8914558 | ERR6096403 | NA | 2015 | Netherlands |
| SAMEA8914559 | ERR6096404 | NA | 2015 | Netherlands |
| SAMEA8914560 | ERR6096405 | NA | 2015 | Netherlands |
| SAMEA8914561 | ERR6096406 | NA | 2015 | Netherlands |
| SAMEA8914564 | ERR6096409 | NA | 2015 | Netherlands |
| SAMEA8914565 | ERR6096410 | NA | 2015 | Netherlands |
| SAMEA8914566 | ERR6096411 | NA | 2016 | Netherlands |
| SAMEA8914567 | ERR6096412 | NA | 2016 | Netherlands |
| SAMEA8914568 | ERR6096413 | NA | 2016 | Netherlands |
| SAMEA8914574 | ERR6096419 | NA | 2016 | Netherlands |
| SAMEA8914575 | ERR6096420 | NA | 2016 | Netherlands |
| SAMEA8914576 | ERR6096421 | NA | 2014 | Norway      |
| SAMEA8914577 | ERR6096422 | NA | 2014 | Norway      |
| SAMEA8914578 | ERR6096423 | NA | 2014 | Norway      |
| SAMEA8914579 | ERR6096424 | NA | 2014 | Norway      |
| SAMEA8914580 | ERR6096425 | NA | 2014 | Norway      |
| SAMEA8914581 | ERR6096426 | NA | 2014 | Norway      |
| SAMEA8914582 | ERR6096427 | NA | 2014 | Norway      |
| SAMEA8914583 | ERR6096428 | NA | 2014 | Norway      |
| SAMEA8914584 | ERR6096429 | NA | 2016 | Norway      |
| SAMEA8914585 | ERR6096430 | NA | 2014 | Norway      |
| SAMEA8914586 | ERR6096431 | NA | 2014 | Norway      |
| SAMEA8914587 | ERR6096432 | NA | 2015 | Norway      |
| SAMEA8914588 | ERR6096433 | NA | 2015 | Norway      |
| SAMEA8914589 | ERR6096434 | NA | 2015 | Norway      |
| SAMEA8914590 | ERR6096435 | NA | 2015 | Norway      |
| SAMEA8914591 | ERR6096436 | NA | 2015 | Norway      |
| SAMEA8914592 | ERR6096437 | NA | 2015 | Norway      |
| SAMEA8914593 | ERR6096438 | NA | 2015 | Norway      |
| SAMEA8914595 | ERR6096440 | NA | 2015 | Norway      |
| SAMEA8914596 | ERR6096441 | NA | 2016 | Norway      |
| SAMEA8914598 | ERR6096443 | NA | 2016 | Norway      |
| SAMEA8914600 | ERR6096281 | NA | 2016 | Norway      |
| SAMEA8914601 | ERR6096282 | NA | 2016 | Norway      |
| SAMEA8914607 | ERR6096452 | NA | 2014 | Sweden      |

|              |            |    |      |                |
|--------------|------------|----|------|----------------|
| SAMEA8914609 | ERR6096454 | NA | 2015 | Sweden         |
| SAMEA8914610 | ERR6096455 | NA | 2015 | Sweden         |
| SAMEA8914615 | ERR6096460 | NA | 2015 | Sweden         |
| SAMEA8914617 | ERR6096462 | NA | 2014 | Sweden         |
| SAMEA8914618 | ERR6096463 | NA | 2015 | Sweden         |
| SAMEA8914619 | ERR6096464 | NA | 2016 | Sweden         |
| SAMEA8914620 | ERR6096465 | NA | 2016 | Sweden         |
| SAMEA8914621 | ERR6096466 | NA | 2016 | Sweden         |
| SAMEA8914622 | ERR6096467 | NA | 2016 | Sweden         |
| SAMEA8914623 | ERR6096468 | NA | 2016 | Sweden         |
| SAMEA8914624 | ERR6096469 | NA | 2016 | Sweden         |
| SAMEA8914625 | ERR6096470 | NA | 2016 | Sweden         |
| SAMEA8914626 | ERR6096471 | NA | 2016 | Sweden         |
| SAMEA8914627 | ERR6096472 | NA | 2016 | Sweden         |
| SAMEA8914628 | ERR6096473 | NA | 2014 | Sweden         |
| SAMEA8914629 | ERR6096474 | NA | 2016 | Sweden         |
| SAMEA8914630 | ERR6096475 | NA | 2014 | Sweden         |
| SAMEA8914631 | ERR6096476 | NA | 2014 | Sweden         |
| SAMEA8914632 | ERR6096477 | NA | 2014 | Sweden         |
| SAMEA8914633 | ERR6096478 | NA | 2014 | Sweden         |
| SAMEA8914634 | ERR6096503 | NA | 2014 | Sweden         |
| SAMEA8914635 | ERR6096504 | NA | 2014 | Sweden         |
| SAMEA8914636 | ERR6096505 | NA | 2014 | United_Kingdom |
| SAMEA8914637 | ERR6096506 | NA | 2014 | United_Kingdom |
| SAMEA8914638 | ERR6096507 | NA | 2014 | United_Kingdom |
| SAMEA8914639 | ERR6096508 | NA | 2014 | United_Kingdom |
| SAMEA8914640 | ERR6096509 | NA | 2014 | United_Kingdom |
| SAMEA8914641 | ERR6096510 | NA | 2014 | United_Kingdom |
| SAMEA8914642 | ERR6096511 | NA | 2014 | United_Kingdom |
| SAMEA8914643 | ERR6096512 | NA | 2014 | United_Kingdom |
| SAMEA8914644 | ERR6096513 | NA | 2014 | United_Kingdom |
| SAMEA8914645 | ERR6096514 | NA | 2014 | United_Kingdom |
| SAMEA8914646 | ERR6096515 | NA | 2015 | United_Kingdom |
| SAMEA8914647 | ERR6096516 | NA | 2015 | United_Kingdom |
| SAMEA8914648 | ERR6096517 | NA | 2015 | United_Kingdom |
| SAMEA8914650 | ERR6096519 | NA | 2015 | United_Kingdom |
| SAMEA8914651 | ERR6096520 | NA | 2015 | United_Kingdom |
| SAMEA8914652 | ERR6096521 | NA | 2015 | United_Kingdom |
| SAMEA8914653 | ERR6096522 | NA | 2015 | United_Kingdom |
| SAMEA8914654 | ERR6096523 | NA | 2015 | United_Kingdom |
| SAMEA8914655 | ERR6096524 | NA | 2015 | United_Kingdom |
| SAMEA8914656 | ERR6096525 | NA | 2016 | United_Kingdom |
| SAMEA8914657 | ERR6096526 | NA | 2016 | United_Kingdom |

|              |                 |                |      |                |
|--------------|-----------------|----------------|------|----------------|
| SAMEA8914658 | ERR6096527      | NA             | 2016 | United_Kingdom |
| SAMEA8914659 | ERR6096528      | NA             | 2016 | United_Kingdom |
| SAMEA8914660 | ERR6096341      | NA             | 2016 | United_Kingdom |
| SAMEA8914661 | ERR6096342      | NA             | 2016 | United_Kingdom |
| SAMEA8914662 | ERR6096531      | NA             | 2016 | United_Kingdom |
| SAMN02360353 | GCA_000812165.1 | I37            | NA   | NA             |
| SAMN02436196 | GCA_000479835.2 | STO1-CHOC-0019 | NA   | NA             |
| SAMN02436197 | GCA_000479895.2 | STO1-CHOC-0016 | NA   | NA             |
| SAMN02436198 | GCA_000479935.2 | CHLA-26        | NA   | NA             |
| SAMN02436199 | GCA_000479435.2 | CHLA-15        | NA   | NA             |
| SAMN02436200 | GCA_000479555.2 | STO1-CHLA-0006 | NA   | NA             |
| SAMN02436201 | GCA_000479515.2 | I036           | NA   | NA             |
| SAMN02436202 | GCA_000479595.2 | H973           | NA   | NA             |
| SAMN02436203 | GCA_000479575.2 | H939           | NA   | NA             |
| SAMN02436205 | GCA_000479535.2 | I176           | NA   | NA             |
| SAMN02436206 | GCA_000479615.2 | STO1-SEAT-0004 | NA   | NA             |
| SAMN02436207 | GCA_000479495.2 | H921           | NA   | NA             |
| SAMN02436244 | GCA_000479915.2 | CHLA-20        | NA   | NA             |
| SAMN02436245 | GCA_000479415.2 | CHLA-13        | NA   | NA             |
| SAMN02436246 | GCA_000479395.2 | I002           | NA   | NA             |
| SAMN02436247 | GCA_000479455.2 | H897           | NA   | NA             |
| SAMN02436248 | GCA_000479675.2 | STO1-SEAT-0007 | NA   | NA             |
| SAMN02436249 | GCA_000479715.2 | STO1-SEAT-0006 | NA   | NA             |
| SAMN02436296 | GCA_000479855.2 | STO1-CHOM-0012 | NA   | NA             |
| SAMN02436297 | GCA_000479795.2 | STO1-CHOC-0008 | NA   | NA             |
| SAMN02436298 | GCA_000479815.2 | STO1-CHOC-0021 | NA   | NA             |
| SAMN02436299 | GCA_000479475.2 | H918           | NA   | NA             |
| SAMN02436300 | GCA_000479695.2 | STO1-CHLA-0011 | NA   | NA             |
| SAMN02436301 | GCA_000479655.2 | 2356847        | NA   | NA             |
| SAMN02436303 | GCA_000479875.2 | STO1-CNMC-0004 | NA   | NA             |
| SAMN02470082 | GCA_000504325.1 | CHLA-11        | 2010 | USA            |
| SAMN02470859 | GCA_000193555.2 | B1831          | NA   | NA             |
| SAMN02470860 | GCA_000193575.2 | B1834          | NA   | NA             |
| SAMN02470861 | GCA_000193515.2 | B0558          | NA   | NA             |
| SAMN02470862 | GCA_000193535.2 | B1193          | NA   | NA             |
| SAMN02470863 | GCA_000193595.3 | B1917          | NA   | NA             |
| SAMN02470864 | GCA_000193615.3 | B1920          | NA   | NA             |
| SAMN02603647 | GCA_000212975.1 | CS             | NA   | NA             |
| SAMN02614590 | GCA_000662235.1 | B200           | 1935 | USA            |
| SAMN02940632 | GCA_020622525.1 | I81            | 2011 | Brazil         |
| SAMN03167927 | GCA_001605365.1 | NA             | 2011 | USA            |
| SAMN03216665 | ERR10311829     | I475           | 2012 | USA            |
| SAMN03216666 | GCA_001605445.1 | NA             | 2012 | USA            |

|              |                 |      |      |        |
|--------------|-----------------|------|------|--------|
| SAMN03216667 | GCA_001605465.1 | NA   | 2012 | USA    |
| SAMN03216668 | ERR10311924     | NA   | 2012 | USA    |
| SAMN03216669 | GCA_001605505.1 | NA   | 2012 | USA    |
| SAMN03216670 | ERR10311963     | NA   | 2012 | USA    |
| SAMN03216671 | ERR10311800     | I517 | 2012 | USA    |
| SAMN03216672 | ERR10311923     | NA   | 2012 | USA    |
| SAMN03216673 | ERR10311882     | NA   | 2012 | USA    |
| SAMN03216674 | GCA_001605585.1 | NA   | 2012 | USA    |
| SAMN03216675 | GCA_001605605.1 | NA   | 2012 | USA    |
| SAMN03216676 | GCA_001605625.1 | NA   | 2012 | USA    |
| SAMN03216677 | SRR932126       | NA   | 2012 | USA    |
| SAMN03216678 | GCA_001605665.1 | NA   | 2011 | USA    |
| SAMN03216679 | GCA_001605685.1 | NA   | 2012 | USA    |
| SAMN03249361 | SRR942708       | NA   | 2010 | USA    |
| SAMN03249362 | SRR932168       | NA   | 2010 | USA    |
| SAMN03249363 | SRR942705       | NA   | 2010 | USA    |
| SAMN03249364 | ERR10311790     | NA   | 2010 | USA    |
| SAMN03249365 | SRR942689       | NA   | 2010 | USA    |
| SAMN03249366 | SRR942687       | NA   | 2010 | USA    |
| SAMN03249367 | SRR942684       | NA   | 2010 | USA    |
| SAMN03249368 | SRR942710       | NA   | 2010 | USA    |
| SAMN03249369 | SRR942703       | NA   | 2010 | USA    |
| SAMN03249370 | SRR931900       | NA   | 2010 | USA    |
| SAMN03249371 | SRR931898       | NA   | 2010 | USA    |
| SAMN03249372 | SRR942697       | NA   | 2010 | USA    |
| SAMN03249373 | SRR1167841      | NA   | 1951 | China  |
| SAMN03249374 | SRR942663       | NA   | 1954 | Japan  |
| SAMN03249375 | ERR029337       | NA   | 2012 | USA    |
| SAMN03249376 | GCA_001509915.1 | NA   | 2013 | USA    |
| SAMN03249377 | SRR931899       | NA   | 2010 | USA    |
| SAMN03249378 | SRR931896       | NA   | 2012 | USA    |
| SAMN03249379 | GCA_001605405.1 | NA   | 2012 | USA    |
| SAMN03249380 | GCA_001605425.1 | NA   | 2012 | USA    |
| SAMN03251820 | GCA_001601785.1 | I488 | 2012 | USA    |
| SAMN03366100 | GCA_001509895.1 | NA   | 2007 | France |
| SAMN03455331 | SRR5071032      | C571 | 2000 | USA    |
| SAMN03455332 | SRR5071061      | C958 | 2001 | USA    |
| SAMN03455333 | SRR5080703      | D521 | 2000 | USA    |
| SAMN03455334 | ERR380612       | D879 | 2002 | USA    |
| SAMN03455335 | SRR5071071      | E150 | 2003 | USA    |
| SAMN03455336 | ERR380621       | E555 | 2004 | USA    |
| SAMN03455337 | ERR316407       | E587 | 2005 | USA    |
| SAMN03455338 | ERR380623       | E809 | 2005 | USA    |

|              |            |      |      |     |
|--------------|------------|------|------|-----|
| SAMN03455339 | ERR316408  | E976 | 2005 | USA |
| SAMN03455340 | ERR380600  | F011 | 2005 | USA |
| SAMN03455341 | SRR5071049 | F034 | 2005 | USA |
| SAMN03455342 | SRR5070991 | F658 | 2008 | USA |
| SAMN03455343 | SRR5080679 | F670 | 2003 | USA |
| SAMN03455344 | SRR3205773 | F684 | 2008 | USA |
| SAMN03455345 | ERR316422  | F687 | 2008 | USA |
| SAMN03455346 | ERR305950  | F948 | 2007 | USA |
| SAMN03455347 | ERR380615  | H520 | 2009 | USA |
| SAMN03455348 | ERR028837  | H579 | 2010 | USA |
| SAMN03455349 | ERR316411  | H637 | 2010 | USA |
| SAMN03455350 | ERR316413  | H665 | 2010 | USA |
| SAMN03455351 | ERR030027  | H703 | 2010 | USA |
| SAMN03455352 | ERR316417  | H707 | 2010 | USA |
| SAMN03455353 | SRR3205778 | H729 | 2011 | USA |
| SAMN03455354 | ERR029987  | H740 | 2011 | USA |
| SAMN03455355 | SRR3205779 | H754 | 2011 | USA |
| SAMN03455356 | ERR316418  | H765 | 2011 | USA |
| SAMN03455357 | SRR5071058 | H784 | 2011 | USA |
| SAMN03455358 | SRR5071046 | H800 | 2011 | USA |
| SAMN03455359 | SRR5071065 | H806 | 2011 | USA |
| SAMN03455360 | SRR5071088 | H810 | 2011 | USA |
| SAMN03455361 | SRR5071055 | H812 | 2011 | USA |
| SAMN03455362 | ERR029293  | I228 | 2012 | USA |
| SAMN03455363 | ERR031086  | I238 | 2012 | USA |
| SAMN03455364 | ERR212385  | I373 | 2012 | USA |
| SAMN03455365 | SRR5829791 | I387 | 2012 | USA |
| SAMN03455366 | ERR361866  | I602 | 2013 | USA |
| SAMN03455367 | ERR212374  | I730 | 2013 | USA |
| SAMN03455368 | ERR212381  | I752 | 2013 | USA |
| SAMN03455369 | SRR5814344 | I763 | 2013 | USA |
| SAMN03455370 | SRR5814342 | I915 | 2010 | USA |
| SAMN03455371 | ERR029326  | I944 | 2013 | USA |
| SAMN03455372 | ERR029304  | J018 | 2013 | USA |
| SAMN03464271 | SRR5105338 | H320 | 2009 | USA |
| SAMN03464272 | ERR029986  | H710 | NA   | USA |
| SAMN03464273 | SRR5071044 | H834 | 2009 | USA |
| SAMN03464274 | ERR212371  | H851 | 2011 | USA |
| SAMN03464275 | SRR5814329 | H911 | 2012 | USA |
| SAMN03464276 | SRR5829834 | H915 | 2011 | USA |
| SAMN03464277 | ERR370327  | I075 | 2012 | USA |
| SAMN03464278 | SRR5814331 | I112 | 2012 | USA |
| SAMN03464279 | ERR380581  | I975 | 2013 | USA |



|              |                 |       |      |             |
|--------------|-----------------|-------|------|-------------|
| SAMN03464280 | SRR12168673     | I998  | 2013 | USA         |
| SAMN03464281 | ERR212375       | J022  | 2013 | USA         |
| SAMN03464282 | ERR031082       | J199  | 2014 | USA         |
| SAMN03466638 | ERR1775321      | NA    | 2008 | NA          |
| SAMN03466639 | ERR1775248      | NA    | 2009 | NA          |
| SAMN03466640 | ERR1775249      | NA    | 2009 | NA          |
| SAMN03466641 | ERR1775256      | NA    | 2009 | NA          |
| SAMN03466642 | ERR1775257      | NA    | 2010 | NA          |
| SAMN03466643 | ERR1775258      | NA    | 2010 | NA          |
| SAMN03466644 | ERR1775259      | NA    | 2011 | NA          |
| SAMN03466645 | ERR1775260      | NA    | 2011 | NA          |
| SAMN03466646 | ERR1775261      | NA    | 2012 | NA          |
| SAMN03466647 | ERR1775262      | NA    | 2012 | NA          |
| SAMN03466648 | ERR1775263      | NA    | 2012 | NA          |
| SAMN03466649 | ERR1775252      | NA    | 2008 | NA          |
| SAMN03466650 | ERR1775254      | NA    | 2008 | NA          |
| SAMN03466651 | ERR1775250      | NA    | 2009 | NA          |
| SAMN03466652 | ERR1775253      | NA    | 2009 | NA          |
| SAMN03466653 | ERR1775251      | NA    | 2010 | NA          |
| SAMN03466654 | ERR1775255      | NA    | 2010 | NA          |
| SAMN03466655 | ERR1775264      | NA    | 2011 | NA          |
| SAMN03466656 | ERR1775265      | NA    | 2011 | NA          |
| SAMN03466657 | ERR1775266      | NA    | 2012 | NA          |
| SAMN03466658 | ERR1775267      | NA    | 2012 | NA          |
| SAMN03466659 | ERR1775272      | NA    | 1997 | NA          |
| SAMN03466660 | ERR1775268      | NA    | 1999 | NA          |
| SAMN03466661 | ERR1775269      | NA    | 2000 | NA          |
| SAMN03466662 | ERR1775270      | NA    | 2001 | NA          |
| SAMN03466663 | ERR1775271      | NA    | 2002 | NA          |
| SAMN03491902 | GCA_001307565.1 | B3621 | 2008 | France      |
| SAMN03491903 | GCA_001307525.1 | B3629 | 2009 | France      |
| SAMN03566780 | GCA_001307585.1 | B1838 | 1999 | Netherlands |
| SAMN03566781 | GCA_001307605.1 | B1865 | 1999 | Netherlands |
| SAMN03566782 | GCA_001307625.1 | B3405 | 2010 | Netherlands |
| SAMN03566783 | GCA_001307645.1 | B3582 | 2009 | Sweden      |
| SAMN03566784 | GCA_001307665.1 | B3585 | 2009 | Sweden      |
| SAMN03566785 | GCA_001307685.1 | B3640 | 2010 | Netherlands |
| SAMN03566786 | GCA_001307705.1 | B3658 | 2009 | Norway      |
| SAMN03566787 | GCA_001307725.1 | B3913 | 2012 | Netherlands |
| SAMN03566788 | GCA_001307745.1 | B3921 | 2012 | Netherlands |
| SAMN03702609 | SRR5071057      | C505  | 2000 | USA         |
| SAMN03702610 | SRR5071079      | C742  | 2000 | USA         |
| SAMN03702611 | ERR361832       | D175  | 2000 | USA         |

|              |            |      |      |     |
|--------------|------------|------|------|-----|
| SAMN03702612 | SRR5071035 | D321 | 2001 | USA |
| SAMN03702613 | SRR5080676 | D502 | 2001 | USA |
| SAMN03702614 | SRR5080702 | E024 | 2003 | USA |
| SAMN03702615 | ERR316406  | E530 | 2000 | USA |
| SAMN03702616 | ERR316414  | H346 | 2010 | USA |
| SAMN03702617 | ERR361840  | H437 | 2006 | USA |
| SAMN03702618 | ERR029989  | H762 | 2011 | USA |
| SAMN03702619 | ERR029307  | H763 | 2011 | USA |
| SAMN03702620 | SRR5105339 | H764 | 2011 | USA |
| SAMN03702621 | SRR5105335 | H766 | 2011 | USA |
| SAMN03702622 | ERR316420  | H768 | 2011 | USA |
| SAMN03702623 | SRR5071076 | H773 | 2011 | USA |
| SAMN03702624 | SRR5071069 | H775 | 2011 | USA |
| SAMN03702625 | SRR5071054 | H779 | 2011 | USA |
| SAMN03702626 | SRR5071059 | H787 | 2011 | USA |
| SAMN03702627 | SRR5071050 | H842 | 2011 | USA |
| SAMN03702628 | SRR5071034 | H847 | 2011 | USA |
| SAMN03702629 | DRR015887  | H849 | 2011 | USA |
| SAMN03702630 | ERR370324  | H853 | 2011 | USA |
| SAMN03702631 | ERR028893  | H864 | 2011 | USA |
| SAMN03702632 | ERR212383  | H866 | 2011 | USA |
| SAMN03702633 | ERR370325  | H878 | 2012 | USA |
| SAMN03702634 | ERR212377  | H883 | 2011 | USA |
| SAMN03702635 | SRR5814340 | H884 | 2011 | USA |
| SAMN03702636 | SRR2037316 | H910 | 2012 | USA |
| SAMN03702637 | SRR5829845 | I069 | 2012 | USA |
| SAMN03702638 | SRR5829809 | I088 | 2012 | USA |
| SAMN03702639 | SRR5814330 | I089 | 2012 | USA |
| SAMN03702640 | SRR5814335 | I110 | 2012 | USA |
| SAMN03702641 | SRR5814333 | I111 | 2012 | USA |
| SAMN03702642 | ERR019595  | I113 | 2012 | USA |
| SAMN03702643 | ERR019589  | I127 | 2012 | USA |
| SAMN03702644 | ERR019598  | I135 | 2012 | USA |
| SAMN03702645 | ERR029305  | I136 | 2012 | USA |
| SAMN03702646 | ERR031089  | I257 | 2012 | USA |
| SAMN03702647 | ERR029998  | I263 | 2012 | USA |
| SAMN03702648 | ERR029999  | I270 | 2012 | USA |
| SAMN03702649 | ERR029981  | I271 | 2012 | USA |
| SAMN03702650 | ERR030025  | I273 | 2012 | USA |
| SAMN03702651 | ERR212365  | I289 | 2012 | USA |
| SAMN03702652 | ERR030022  | I315 | 2012 | USA |
| SAMN03702653 | ERR030026  | I318 | 2012 | USA |
| SAMN03702654 | ERR030024  | I331 | 2012 | USA |

|              |                 |       |      |       |
|--------------|-----------------|-------|------|-------|
| SAMN03702655 | ERR029332       | I350  | 2012 | USA   |
| SAMN03702656 | ERR305951       | I375  | 2012 | USA   |
| SAMN03702657 | ERR031099       | I379  | 2012 | USA   |
| SAMN03702658 | ERR031101       | I380  | 2012 | USA   |
| SAMN03702659 | SRR9002831      | I382  | 2012 | USA   |
| SAMN03702660 | SRR5829822      | I386  | 2012 | USA   |
| SAMN03702661 | SRR5829865      | I452  | 2012 | USA   |
| SAMN03702662 | SRR5829847      | I461  | 2012 | USA   |
| SAMN03702663 | ERR212382       | I728  | 2013 | USA   |
| SAMN03702664 | ERR305955       | I735  | 2013 | USA   |
| SAMN03702665 | SRR5814350      | I754  | 2013 | USA   |
| SAMN03702666 | SRR5814348      | I755  | 2013 | USA   |
| SAMN03702667 | SRR5814346      | I762  | 2013 | USA   |
| SAMN03702668 | ERR029324       | I959  | 2013 | USA   |
| SAMN03702669 | ERR361868       | I965  | 2013 | USA   |
| SAMN03702670 | ERR212368       | I968  | 2013 | USA   |
| SAMN03702671 | ERR305958       | I977  | 2013 | USA   |
| SAMN03702672 | ERR305959       | I978  | 2013 | USA   |
| SAMN03702673 | ERR305960       | J012  | 2013 | USA   |
| SAMN03702674 | ERR380582       | J016  | 2013 | USA   |
| SAMN03702675 | ERR361825       | J019  | 2013 | USA   |
| SAMN03702676 | ERR305963       | J021  | 2013 | USA   |
| SAMN03702677 | SRR5829867      | J023  | 2013 | USA   |
| SAMN03702678 | SRR5829874      | J027  | 2013 | USA   |
| SAMN03702679 | ERR380586       | J030  | 2013 | USA   |
| SAMN03702680 | ERR046463       | J039  | NA   | USA   |
| SAMN03702681 | SRR5829858      | J068  | 2013 | USA   |
| SAMN03702682 | SRR5829849      | J072  | 2013 | USA   |
| SAMN03702683 | SRR5829873      | J073  | 2013 | USA   |
| SAMN03702684 | ERR212372       | J076  | 2013 | USA   |
| SAMN03702685 | SRR5829857      | J090  | 2013 | USA   |
| SAMN03702686 | SRR5814326      | J091  | 2014 | USA   |
| SAMN03702687 | ERR380587       | J098  | 2014 | USA   |
| SAMN03702688 | ERR911435       | J100  | 2014 | USA   |
| SAMN03702689 | ERR046464       | J110  | 2014 | USA   |
| SAMN03702690 | ERR304770       | J115  | 2014 | USA   |
| SAMN03784877 | GCA_001187405.1 | BpC90 | 2014 | Italy |
| SAMN03854490 | ERR316415       | H681  | 2009 | USA   |
| SAMN03854491 | SRR2037314      | H852  | 2011 | USA   |
| SAMN03854492 | SRR5814341      | I106  | 2012 | USA   |
| SAMN03854493 | ERR305953       | I351  | 2012 | USA   |
| SAMN03854494 | ERR019602       | I743  | 2013 | USA   |
| SAMN03854495 | ERR019600       | I751  | 2012 | USA   |

|              |                 |              |      |                |
|--------------|-----------------|--------------|------|----------------|
| SAMN03854496 | ERR029291       | I976         | 2013 | USA            |
| SAMN03854497 | ERR212386       | J010         | 2013 | USA            |
| SAMN03854498 | ERR305961       | J013         | 2013 | USA            |
| SAMN03854499 | ERR361824       | J038         | 2013 | USA            |
| SAMN03854500 | ERR380560       | J107         | 2014 | USA            |
| SAMN03854501 | ERR380564       | J169         | NA   | NA             |
| SAMN03877216 | SRR5071072      | B203         | 1939 | USA            |
| SAMN03877217 | SRR5105333      | G057         | 2004 | USA            |
| SAMN03877218 | ERR316412       | NA           | 2010 | USA            |
| SAMN03877219 | ERR029314       | NA           | 2012 | USA            |
| SAMN03877220 | ERR029294       | NA           | 2012 | USA            |
| SAMN03877221 | ERR029996       | NA           | 2012 | USA            |
| SAMN03877222 | SRR5829877      | NA           | 2012 | USA            |
| SAMN03877223 | ERR028842       | J014         | 2013 | USA            |
| SAMN03996251 | GCA_001525555.2 | FDAARGOS_178 | 1952 | USA            |
| SAMN03996260 | GCA_001558395.2 | FDAARGOS_179 | 1999 | USA            |
| SAMN04221179 | SRR5070969      | B201         | 1955 | USA            |
| SAMN04221180 | SRR5070978      | B227         | 1967 | United_Kingdom |
| SAMN04221181 | SRR5071039      | NA           | 2000 | USA            |
| SAMN04221182 | SRR5071063      | NA           | 2000 | USA            |
| SAMN04221183 | SRR5071048      | NA           | 2000 | USA            |
| SAMN04221184 | SRR5071008      | E194         | 2003 | USA            |
| SAMN04221185 | SRR5070971      | E602         | 2005 | USA            |
| SAMN04221186 | SRR5105342      | NA           | 2010 | USA            |
| SAMN04221187 | SRR3205777      | H682         | 2009 | USA            |
| SAMN04221188 | SRR5070914      | H698         | 2010 | USA            |
| SAMN04221189 | ERR316416       | H706         | 2010 | USA            |
| SAMN04221190 | SRR5070912      | H730         | 2011 | USA            |
| SAMN04221191 | SRR5070927      | H771         | 2011 | USA            |
| SAMN04221192 | ERR304776       | J178         | 2014 | USA            |
| SAMN04221193 | ERR380593       | J179         | 2014 | USA            |
| SAMN04221194 | ERR304777       | J191         | 2014 | USA            |
| SAMN04221195 | ERR380574       | J192         | 2014 | USA            |
| SAMN04221196 | ERR380580       | J193         | 2014 | USA            |
| SAMN04221197 | ERR380602       | J194         | 2014 | USA            |
| SAMN04221198 | ERR019585       | J197         | 2014 | USA            |
| SAMN04221199 | ERR361851       | J201         | 2014 | USA            |
| SAMN04221200 | SRR2823948      | J225         | 2014 | USA            |
| SAMN04383559 | SRR3205771      | C975         | 2000 | USA            |
| SAMN04383560 | SRR5070990      | E368         | 2004 | USA            |
| SAMN04383561 | ERR316409       | F501         | 2004 | USA            |
| SAMN04383562 | SRR1610549      | F657         | 2007 | USA            |
| SAMN04383563 | SRR3205774      | F778         | 2004 | USA            |

|              |                 |      |      |     |
|--------------|-----------------|------|------|-----|
| SAMN04383564 | ERR380611       | F934 | 2009 | USA |
| SAMN04383565 | ERR380613       | G085 | 2008 | USA |
| SAMN04383566 | SRR5071022      | G807 | 2005 | USA |
| SAMN04383567 | SRR5070995      | G965 | 2002 | USA |
| SAMN04383568 | SRR5070923      | H348 | 2010 | USA |
| SAMN04383569 | SRR5070965      | H361 | 2010 | USA |
| SAMN04383570 | SRR5070937      | H533 | 2009 | USA |
| SAMN04383571 | SRR5070932      | H540 | 2010 | USA |
| SAMN04383572 | SRR5070925      | H636 | 2010 | USA |
| SAMN04383573 | ERR212369       | H876 | 2012 | USA |
| SAMN04383574 | SRR5814337      | I093 | 2012 | USA |
| SAMN04383575 | SRR5814327      | J093 | 2014 | USA |
| SAMN04383576 | ERR305965       | J097 | 2014 | USA |
| SAMN04383577 | ERR361867       | J099 | 2014 | USA |
| SAMN04383578 | ERR911434       | J103 | 2014 | USA |
| SAMN04383579 | ERR212380       | J104 | 2014 | USA |
| SAMN04383580 | ERR911433       | J105 | 2014 | USA |
| SAMN04383581 | ERR911431       | J120 | 2014 | USA |
| SAMN04383582 | ERR911430       | J121 | 2014 | USA |
| SAMN04383583 | ERR911429       | J122 | 2014 | USA |
| SAMN04383584 | ERR1274624      | J124 | 2014 | USA |
| SAMN04383585 | SRR5070946      | J149 | 2014 | USA |
| SAMN04383587 | ERR361841       | J155 | 2014 | USA |
| SAMN04383588 | ERR304775       | J159 | 2014 | USA |
| SAMN04383589 | ERR304773       | J161 | 2014 | USA |
| SAMN04383590 | ERR304774       | J162 | 2014 | USA |
| SAMN04383591 | ERR380566       | J174 | 2014 | USA |
| SAMN04383592 | GCA_002068975.1 | J175 | 2014 | USA |
| SAMN04383593 | ERR304779       | J198 | 2014 | USA |
| SAMN04383594 | ERR380583       | J206 | 2014 | USA |
| SAMN04383595 | ERR380603       | J208 | 2014 | USA |
| SAMN04383596 | ERR361856       | J210 | 2014 | USA |
| SAMN04383597 | ERR361838       | J276 | 2014 | USA |
| SAMN04383598 | ERR380585       | J277 | 2014 | USA |
| SAMN04383599 | SRR5070967      | J296 | 2014 | USA |
| SAMN04383600 | SRR5070909      | J300 | 2014 | USA |
| SAMN04383601 | SRR5070935      | J305 | 2014 | USA |
| SAMN04383602 | SRR5070949      | J311 | 2014 | USA |
| SAMN04383603 | SRR5080694      | NA   | 2014 | USA |
| SAMN04388406 | SRR5814324      | J096 | 2014 | USA |
| SAMN04388407 | ERR028841       | B199 | 1935 | USA |
| SAMN04388408 | SRR9002875      | J377 | 2015 | USA |
| SAMN04388409 | SRR9002889      | J358 | 2014 | USA |

|              |                 |              |      |                |
|--------------|-----------------|--------------|------|----------------|
| SAMN04867627 | GCA_001686505.1 | VA-09        | 2001 | USA            |
| SAMN04867628 | GCA_001686605.1 | VA-10        | 2001 | USA            |
| SAMN04867629 | GCA_001686525.1 | VA-15        | 2001 | USA            |
| SAMN04867630 | GCA_001686545.1 | VA-18        | 2001 | USA            |
| SAMN04867631 | GCA_001686465.1 | VA-52        | 2005 | USA            |
| SAMN04867632 | GCA_001686565.1 | VA-62        | 2005 | USA            |
| SAMN04867633 | GCA_001686585.1 | VA-145       | 2010 | USA            |
| SAMN04867634 | GCA_001686445.1 | VA-150       | 2010 | USA            |
| SAMN04867635 | GCA_001686425.1 | VA-175       | 2012 | USA            |
| SAMN04867636 | GCA_001686365.1 | VA-190       | 2012 | USA            |
| SAMN04867637 | GCA_001686405.1 | VA-194       | 2013 | USA            |
| SAMN04867638 | GCA_001686485.1 | VA-198       | 2013 | USA            |
| SAMN04875532 | SRR942661       | FDAARGOS_195 | 1950 | Japan          |
| SAMN04994865 | GCA_001686625.1 | UT25Sm1      | 1977 | USA            |
| SAMN05333713 | ERR028844       | NA           | 1947 | USA            |
| SAMN05333714 | ERR030015       | J043         | 1947 | USA            |
| SAMN05333715 | SRR9006153      | C927         | NA   | NA             |
| SAMN05333716 | SRR5070758      | NA           | 1946 | USA            |
| SAMN05560220 | ERR142612       | Pillemer     | 1950 | USA            |
| SAMN05583809 | SRR9006157      | B226         | 1967 | United_Kingdom |
| SAMN05583810 | SRR9006154      | C934         | 2000 | USA            |
| SAMN05583811 | SRR9006219      | D422         | 2002 | USA            |
| SAMN05583812 | SRR9006221      | D717         | 2002 | USA            |
| SAMN05583813 | SRR9006224      | D735         | 2000 | USA            |
| SAMN05583814 | SRR9006223      | D799         | 2002 | USA            |
| SAMN05583815 | SRR9006191      | E537         | 2001 | USA            |
| SAMN05583816 | SRR9006193      | E898         | 2005 | USA            |
| SAMN05583817 | SRR9006194      | E945         | 2005 | USA            |
| SAMN05583818 | SRR9006195      | F013         | 2005 | USA            |
| SAMN05583848 | SRR9006215      | D925         | 2002 | USA            |
| SAMN05583849 | GCA_002286155.1 | E025         | 2003 | USA            |
| SAMN05583850 | SRR9006192      | E541         | 2003 | USA            |
| SAMN05716050 | ERR028864       | J148         | 2014 | USA            |
| SAMN05716051 | SRR5080688      | J153         | 2014 | USA            |
| SAMN05716052 | ERR030035       | J154         | 2014 | USA            |
| SAMN05716053 | ERR028873       | J160         | 2014 | USA            |
| SAMN05716054 | ERR028870       | J172         | 2014 | USA            |
| SAMN05716055 | ERR028880       | J209         | 2014 | USA            |
| SAMN05716056 | ERR030011       | J230         | 2014 | USA            |
| SAMN05751692 | ERR037404       | J108         | 2014 | USA            |
| SAMN05751693 | ERR028859       | J109         | 2014 | USA            |
| SAMN05751694 | SRR5080706      | J151         | 2014 | USA            |
| SAMN05751695 | ERR028872       | J222         | 2014 | USA            |

|              |                 |        |      |        |
|--------------|-----------------|--------|------|--------|
| SAMN05751696 | SRR5105349      | J223   | 2014 | USA    |
| SAMN05751697 | SRR5105347      | J224   | 2014 | USA    |
| SAMN05751698 | SRR5080672      | J226   | 2014 | USA    |
| SAMN05751699 | ERR029982       | J165   | 2014 | USA    |
| SAMN05751700 | ERR028860       | J170   | 2014 | USA    |
| SAMN05751701 | SRR5080683      | J308   | 2014 | USA    |
| SAMN05751702 | SRR5080701      | J310   | 2014 | USA    |
| SAMN05770313 | SRR5070992      | 134    | NA   | NA     |
| SAMN05770314 | SRR5070984      | 509    | NA   | NA     |
| SAMN05770315 | SRR5070993      | 6229   | NA   | NA     |
| SAMN05770316 | SRR5070702      | 25525  | NA   | NA     |
| SAMN05776224 | GCA_020536205.1 | Bp1913 | 2004 | Brazil |
| SAMN05782317 | GCA_020622465.1 | Bp2041 | 2004 | Brazil |
| SAMN05783037 | GCA_020622445.1 | Bp168  | 2013 | Brazil |
| SAMN05784484 | GCA_020622475.1 | Bp100  | 2008 | Brazil |
| SAMN05908220 | SRR4422987      | NA     | 2006 | Israel |
| SAMN05908221 | SRR12778356     | NA     | 2007 | Israel |
| SAMN05908222 | SRR12778355     | NA     | 2008 | Israel |
| SAMN05908223 | SRR12778354     | NA     | 2007 | Israel |
| SAMN05908224 | SRR4422986      | NA     | 2008 | Israel |
| SAMN05908225 | SRR4422989      | NA     | 2007 | Israel |
| SAMN05908226 | SRR4422988      | NA     | 2008 | Israel |
| SAMN05908227 | SRR4422997      | NA     | 2008 | Israel |
| SAMN05908228 | SRR4423003      | NA     | 2007 | Israel |
| SAMN05908229 | SRR4422995      | NA     | 2007 | Israel |
| SAMN05908230 | SRR4423001      | NA     | 2007 | Israel |
| SAMN05908231 | SRR12778365     | NA     | 2007 | Israel |
| SAMN05908232 | SRR12778364     | NA     | 2008 | Israel |
| SAMN05908233 | SRR12778363     | NA     | 2008 | Israel |
| SAMN05908234 | SRR12778361     | NA     | NA   | Israel |
| SAMN05908235 | SRR12778360     | NA     | 2008 | Israel |
| SAMN05908236 | SRR12778359     | NA     | 2008 | Israel |
| SAMN05908237 | SRR12778358     | NA     | 2009 | Israel |
| SAMN05908238 | SRR12778357     | NA     | 2011 | Israel |
| SAMN05948795 | GCA_002859565.1 | I384   | 2012 | USA    |
| SAMN05948796 | SRR9002830      | I385   | 2012 | USA    |
| SAMN05948797 | ERR028836       | J074   | 2013 | USA    |
| SAMN05950788 | ERR028867       | J173   | 2014 | USA    |
| SAMN05950789 | ERR030040       | NA     | 2014 | USA    |
| SAMN05950790 | ERR031085       | J203   | 2014 | USA    |
| SAMN05950791 | ERR028886       | J295   | 2014 | USA    |
| SAMN06007540 | ERR028848       | J094   | 2014 | USA    |
| SAMN06007541 | ERR028866       | J207   | 2014 | USA    |

|              |            |      |      |        |
|--------------|------------|------|------|--------|
| SAMN06007542 | ERR028829  | J294 | 2014 | USA    |
| SAMN06007543 | ERR028828  | J304 | 2014 | USA    |
| SAMN06007544 | SRR5080673 | J306 | 2014 | USA    |
| SAMN06007545 | SRR9002849 | J313 | 2014 | USA    |
| SAMN06007762 | SRR9002834 | I094 | 2012 | USA    |
| SAMN06007763 | SRR9002814 | H782 | 2011 | USA    |
| SAMN06113434 | SRR5070668 | NA   | 2012 | Canada |
| SAMN06113435 | SRR5070674 | NA   | 2012 | Canada |
| SAMN06113437 | SRR4271510 | NA   | 2012 | Canada |
| SAMN06113438 | SRR4271511 | NA   | 2012 | Canada |
| SAMN06113439 | SRR3205792 | NA   | 2012 | Canada |
| SAMN06113441 | SRR3205797 | NA   | 2012 | Canada |
| SAMN06113442 | SRR5070672 | NA   | 2012 | Canada |
| SAMN06113443 | SRR5070661 | NA   | 2012 | Canada |
| SAMN06113444 | SRR5070719 | NA   | 2012 | Canada |
| SAMN06113445 | SRR5070714 | NA   | 2012 | Canada |
| SAMN06113446 | SRR5070716 | NA   | 2012 | Canada |
| SAMN06113447 | SRR5070686 | NA   | 2012 | Canada |
| SAMN06113448 | SRR5070678 | NA   | 2012 | Canada |
| SAMN06113449 | SRR5070671 | NA   | 2012 | Canada |
| SAMN06113450 | SRR5070699 | NA   | 2012 | Canada |
| SAMN06113451 | SRR5070711 | NA   | 2012 | Canada |
| SAMN06113452 | SRR5070696 | NA   | 2012 | Canada |
| SAMN06113453 | SRR5070691 | NA   | 2012 | Canada |
| SAMN06113454 | SRR5070670 | NA   | 2012 | Canada |
| SAMN06113455 | SRR5070706 | NA   | 2012 | Canada |
| SAMN06113456 | SRR5070701 | NA   | 2012 | Canada |
| SAMN06113457 | SRR5070681 | NA   | 2012 | Canada |
| SAMN06113458 | SRR5070692 | NA   | 2012 | Canada |
| SAMN06113459 | SRR5070666 | NA   | 2012 | Canada |
| SAMN06113460 | SRR5070707 | NA   | 2012 | Canada |
| SAMN06113462 | SRR5070717 | NA   | 2013 | Canada |
| SAMN06113464 | SRR5070679 | NA   | 2013 | Canada |
| SAMN06113465 | SRR5070665 | NA   | 2013 | Canada |
| SAMN06113466 | SRR5070710 | NA   | 2013 | Canada |
| SAMN06113467 | SRR5070705 | NA   | 2013 | Canada |
| SAMN06113468 | SRR5070684 | NA   | 2013 | Canada |
| SAMN06113469 | SRR5070694 | NA   | 2013 | Canada |
| SAMN06113470 | SRR5070675 | NA   | 2013 | Canada |
| SAMN06113471 | SRR5070663 | NA   | 2013 | Canada |
| SAMN06113473 | SRR5070660 | NA   | 2013 | Canada |
| SAMN06140498 | SRR5070729 | NA   | 2012 | USA    |
| SAMN06140499 | SRR3205781 | NA   | 2012 | USA    |



|              |                 |            |      |           |
|--------------|-----------------|------------|------|-----------|
| SAMN06140500 | SRR3205784      | NA         | 2012 | USA       |
| SAMN06140501 | SRR5070763      | NA         | 2012 | USA       |
| SAMN06140502 | SRR3205787      | NA         | 2012 | USA       |
| SAMN06140503 | SRR5070769      | NA         | 2012 | USA       |
| SAMN06140504 | SRR5070771      | NA         | 2012 | USA       |
| SAMN06140505 | SRR5070747      | NA         | 2012 | USA       |
| SAMN06140506 | SRR3205764      | NA         | 2012 | USA       |
| SAMN06140507 | SRR3205765      | NA         | 2012 | USA       |
| SAMN06140508 | SRR5070739      | NA         | 2012 | USA       |
| SAMN06140509 | SRR3205768      | NA         | 2012 | USA       |
| SAMN06434363 | GCA_002021795.1 | Pelita_III | NA   | Japan     |
| SAMN07137591 | SRR9002815      | H696       | 2011 | USA       |
| SAMN07137592 | ERR037403       | J078       | 2013 | USA       |
| SAMN07137593 | SRR9006188      | J473       | 2016 | USA       |
| SAMN07235949 | GCA_002270325.1 | ID20       | 2014 | Australia |
| SAMN07326325 | SRR5070999      | NA         | 2015 | China     |
| SAMN07327524 | GCA_002240515.1 | J625       | 2016 | USA       |
| SAMN07329766 | SRR5070982      | NA         | 2015 | China     |
| SAMN07329767 | SRR5071010      | NA         | 2015 | China     |
| SAMN07329768 | SRR5070986      | NA         | 2015 | China     |
| SAMN07329769 | SRR5071026      | NA         | 2015 | China     |
| SAMN07329770 | SRR5070988      | NA         | 2015 | China     |
| SAMN07329771 | SRR5070972      | NA         | 2015 | China     |
| SAMN07329772 | SRR5070975      | NA         | 2015 | China     |
| SAMN07329773 | SRR5070974      | NA         | 2015 | China     |
| SAMN07329774 | SRR5070979      | NA         | 2015 | China     |
| SAMN07329775 | SRR5071024      | NA         | 2015 | China     |
| SAMN07329776 | SRR5070998      | NA         | 2015 | China     |
| SAMN07329777 | SRR5071014      | NA         | 2015 | China     |
| SAMN07329778 | SRR5070983      | NA         | 2015 | China     |
| SAMN07329779 | SRR5071002      | NA         | 2015 | China     |
| SAMN07329780 | SRR5071019      | NA         | 2016 | China     |
| SAMN07329781 | SRR5070976      | NA         | 2016 | China     |
| SAMN07329782 | SRR5071015      | NA         | 2016 | China     |
| SAMN07329783 | SRR5071003      | NA         | 2016 | China     |
| SAMN07329784 | SRR5070981      | NA         | 2015 | China     |
| SAMN07329785 | SRR5070918      | NA         | 2015 | China     |
| SAMN07329786 | SRR5070919      | NA         | 2015 | China     |
| SAMN07329787 | SRR5070922      | NA         | 2015 | China     |
| SAMN07329788 | SRR5070952      | NA         | 2016 | China     |
| SAMN07329789 | SRR5070916      | NA         | 2016 | China     |
| SAMN07329790 | SRR5070924      | NA         | 2016 | China     |
| SAMN07329791 | SRR5070957      | NA         | 2016 | China     |

|              |            |      |      |       |
|--------------|------------|------|------|-------|
| SAMN07329792 | SRR5070944 | NA   | 2016 | China |
| SAMN07329793 | SRR5070942 | NA   | 2016 | China |
| SAMN07329794 | SRR5071006 | NA   | 2016 | China |
| SAMN07329795 | SRR5071028 | NA   | 2016 | China |
| SAMN07352190 | ERR028840  | H920 | 2011 | USA   |
| SAMN07352191 | ERR029991  | NA   | 2012 | USA   |
| SAMN07352192 | ERR030018  | I955 | 2013 | USA   |
| SAMN07352193 | ERR030012  | I958 | 2013 | USA   |
| SAMN07352194 | ERR028895  | J024 | 2013 | USA   |
| SAMN07352195 | ERR030013  | J029 | 2013 | USA   |
| SAMN07352196 | ERR028894  | J066 | 2013 | USA   |
| SAMN07352197 | ERR028850  | J077 | 2013 | USA   |
| SAMN07352198 | ERR030014  | J083 | 2013 | USA   |
| SAMN07352199 | ERR028875  | J085 | 2013 | USA   |
| SAMN07352200 | ERR028847  | NA   | 2014 | USA   |
| SAMN07352201 | ERR037402  | NA   | 2014 | USA   |
| SAMN07352202 | ERR028855  | NA   | 2014 | USA   |
| SAMN07352203 | SRR5071090 | NA   | 2014 | USA   |
| SAMN07352204 | ERR028856  | NA   | 2014 | USA   |
| SAMN07352205 | ERR030032  | NA   | 2014 | USA   |
| SAMN07352206 | SRR5080697 | NA   | 2014 | USA   |
| SAMN07352207 | ERR030037  | NA   | 2014 | USA   |
| SAMN07352208 | ERR028874  | NA   | 2014 | USA   |
| SAMN07352209 | ERR028861  | J171 | 2014 | USA   |
| SAMN07352210 | ERR030034  | NA   | 2014 | USA   |
| SAMN07352211 | ERR028868  | NA   | 2014 | USA   |
| SAMN07352212 | SRR5080686 | NA   | 2014 | USA   |
| SAMN07352213 | ERR028882  | J204 | 2014 | USA   |
| SAMN07352214 | SRR5080678 | J205 | 2014 | USA   |
| SAMN07352215 | SRR5105346 | NA   | 2014 | USA   |
| SAMN07352216 | SRR5080710 | NA   | 2014 | USA   |
| SAMN07352217 | SRR5080698 | NA   | 2014 | USA   |
| SAMN07352218 | SRR5234777 | J246 | 2014 | USA   |
| SAMN07352219 | ERR030009  | J247 | 2014 | USA   |
| SAMN07352220 | ERR028826  | NA   | 2014 | USA   |
| SAMN07352221 | ERR037419  | NA   | 2014 | USA   |
| SAMN07352222 | SRR5080681 | NA   | 2014 | USA   |
| SAMN07352223 | SRR5080709 | NA   | 2014 | USA   |
| SAMN07352224 | ERR037415  | J299 | 2014 | USA   |
| SAMN07352225 | ERR037417  | NA   | 2014 | USA   |
| SAMN07352226 | ERR028832  | NA   | 2014 | USA   |
| SAMN07352227 | ERR028881  | J303 | 2014 | USA   |
| SAMN07352228 | ERR028823  | NA   | 2014 | USA   |

|              |                 |        |      |        |
|--------------|-----------------|--------|------|--------|
| SAMN07362432 | SRR5814320      | 224-8  | 2008 | Mexico |
| SAMN07362433 | SRR5814323      | 601-9  | 2009 | Mexico |
| SAMN07362434 | SRR5814322      | 620-12 | 2012 | Mexico |
| SAMN07362435 | SRR5814321      | 781-14 | 2014 | Mexico |
| SAMN08016809 | SRR9002880      | J384   | 2015 | USA    |
| SAMN08136964 | SRR9006155      | C569   | 2000 | USA    |
| SAMN08136965 | SRR9006220      | C756   | 2000 | USA    |
| SAMN08136966 | SRR9006156      | C871   | 2000 | USA    |
| SAMN08136967 | SRR9006152      | D322   | 2001 | USA    |
| SAMN08136968 | SRR9006225      | D869   | 2002 | USA    |
| SAMN08136969 | SRR9006216      | D919   | 2002 | USA    |
| SAMN08136970 | SRR9006213      | E087   | 2002 | USA    |
| SAMN08136971 | SRR9006212      | E140   | 2002 | USA    |
| SAMN08136973 | SRR9006197      | F578   | 2007 | USA    |
| SAMN08136974 | SRR9006198      | F580   | 2007 | USA    |
| SAMN08136975 | SRR9006189      | F954   | 2007 | USA    |
| SAMN08136976 | SRR9006166      | H034   | 2009 | USA    |
| SAMN08136977 | SRR9006178      | H640   | 2010 | USA    |
| SAMN08136978 | SRR9002820      | H642   | 2010 | USA    |
| SAMN08136979 | SRR9002817      | H672   | 2010 | USA    |
| SAMN08136980 | SRR9002818      | H677   | 2010 | USA    |
| SAMN08136981 | SRR9002816      | H697   | 2011 | USA    |
| SAMN08136982 | SRR9002813      | H709   | 2010 | USA    |
| SAMN08136983 | GCA_004007275.1 | H742   | 2011 | USA    |
| SAMN08136984 | GCA_004009315.1 | H778   | 2011 | USA    |
| SAMN08136985 | SRR9002821      | H811   | 2011 | USA    |
| SAMN08136986 | SRR9002822      | H813   | 2011 | USA    |
| SAMN08136987 | SRR9002835      | H902   | 2011 | USA    |
| SAMN08136988 | SRR9002841      | I120   | 2012 | USA    |
| SAMN08136989 | SRR9002838      | I223   | 2012 | USA    |
| SAMN08136990 | SRR9002842      | I372   | 2012 | USA    |
| SAMN08136991 | SRR9006165      | J185   | 2013 | USA    |
| SAMN08136992 | SRR9006161      | J234   | 2013 | USA    |
| SAMN08164936 | SRR9006218      | E198   | 2003 | USA    |
| SAMN08164937 | SRR9006217      | E365   | 2004 | USA    |
| SAMN08164938 | SRR9006190      | G102   | 2008 | USA    |
| SAMN08164939 | SRR9006168      | H541   | 2010 | USA    |
| SAMN08164940 | SRR9002837      | H814   | 2007 | USA    |
| SAMN08164941 | SRR9002836      | H877   | 2012 | USA    |
| SAMN08164942 | SRR9002839      | I188   | 2012 | USA    |
| SAMN08164943 | SRR9002843      | I323   | 2012 | USA    |
| SAMN08164944 | SRR9002827      | I439   | 2012 | USA    |
| SAMN08164945 | SRR9002826      | I462   | 2012 | USA    |

|              |                 |      |      |                |
|--------------|-----------------|------|------|----------------|
| SAMN08164946 | SRR9002829      | I598 | 2013 | USA            |
| SAMN08164947 | SRR9002828      | I623 | 2012 | USA            |
| SAMN08164948 | SRR9002902      | I692 | 2011 | USA            |
| SAMN08164949 | SRR9006120      | I896 | 2007 | USA            |
| SAMN08164950 | SRR9006121      | I945 | 2013 | USA            |
| SAMN08164951 | SRR9006118      | J184 | 2012 | USA            |
| SAMN08178166 | SRR9006209      | E191 | 2003 | USA            |
| SAMN08178167 | SRR9006150      | I859 | 2012 | USA            |
| SAMN08178168 | SRR9006119      | I892 | 2007 | USA            |
| SAMN08200079 | SRR9006117      | J139 | 2013 | USA            |
| SAMN08200080 | SRR9006151      | D236 | 2001 | USA            |
| SAMN08200081 | SRR9006222      | D665 | 2002 | USA            |
| SAMN08200082 | SRR9006167      | H624 | 2010 | USA            |
| SAMN08214406 | SRR9006196      | F569 | 2006 | USA            |
| SAMN08214407 | SRR9002832      | I420 | 2012 | USA            |
| SAMN08214408 | SRR9002874      | I705 | 2011 | USA            |
| SAMN08214409 | SRR9002840      | I182 | 2012 | USA            |
| SAMN08395605 | SRR9006158      | B228 | 1967 | United_Kingdom |
| SAMN08395606 | SRR9006164      | J249 | 2014 | USA            |
| SAMN08395607 | SRR9006163      | J250 | 2014 | USA            |
| SAMN08395608 | SRR9006160      | J251 | 2014 | USA            |
| SAMN08395609 | SRR9006159      | J252 | 2014 | USA            |
| SAMN08395610 | SRR9006145      | J253 | 2014 | USA            |
| SAMN08395611 | SRR9006146      | J254 | 2014 | USA            |
| SAMN08395612 | SRR9006177      | J255 | 2014 | USA            |
| SAMN08395613 | SRR9006176      | J256 | 2014 | USA            |
| SAMN08395614 | SRR9006175      | J257 | 2014 | USA            |
| SAMN08395615 | SRR9006174      | J258 | 2014 | USA            |
| SAMN08395616 | SRR9006173      | J259 | 2014 | USA            |
| SAMN08395617 | SRR9006172      | J260 | 2014 | USA            |
| SAMN08395618 | SRR9006171      | J262 | 2014 | USA            |
| SAMN08395619 | SRR9006170      | J263 | 2014 | USA            |
| SAMN08395620 | SRR9006169      | J264 | 2014 | USA            |
| SAMN08395621 | SRR9006226      | J266 | 2014 | USA            |
| SAMN08395622 | SRR9002825      | J267 | 2014 | USA            |
| SAMN08395623 | SRR9002824      | J268 | 2014 | USA            |
| SAMN08395624 | SRR9002852      | J269 | 2014 | USA            |
| SAMN08395625 | SRR9002853      | J270 | 2014 | USA            |
| SAMN08395626 | SRR9002850      | J272 | 2014 | USA            |
| SAMN08395627 | SRR9002851      | J274 | 2014 | USA            |
| SAMN08395628 | SRR9002848      | J275 | 2014 | USA            |
| SAMN08395629 | GCA_004634765.1 | J322 | 2015 | USA            |
| SAMN08395630 | SRR9002847      | J323 | 2015 | USA            |

|              |                 |      |      |           |
|--------------|-----------------|------|------|-----------|
| SAMN08395631 | SRR9002844      | J330 | 2014 | Guatemala |
| SAMN08395632 | SRR9002845      | J332 | 2014 | Guatemala |
| SAMN08395633 | SRR9002823      | J334 | 2014 | Guatemala |
| SAMN08395634 | SRR9002913      | J336 | 2014 | Guatemala |
| SAMN08395635 | SRR9002914      | J354 | 2015 | USA       |
| SAMN08395636 | SRR9002890      | J357 | 2014 | USA       |
| SAMN08395637 | SRR9002888      | J359 | 2014 | USA       |
| SAMN08395638 | SRR9002887      | J360 | 2014 | USA       |
| SAMN08395639 | SRR9006143      | J363 | 2014 | USA       |
| SAMN08395640 | GCA_004634605.1 | J364 | 2014 | USA       |
| SAMN08395641 | GCA_004634585.1 | J366 | 2014 | USA       |
| SAMN08395642 | SRR9006142      | J367 | 2014 | USA       |
| SAMN08395643 | SRR9006137      | J370 | 2014 | USA       |
| SAMN08395644 | SRR9002876      | J376 | 2014 | USA       |
| SAMN08395645 | SRR9002895      | J391 | 2015 | USA       |
| SAMN08395646 | GCA_004635505.1 | J392 | 2015 | USA       |
| SAMN08395647 | SRR9006184      | J393 | 2015 | USA       |
| SAMN08395648 | SRR9006183      | J401 | 2015 | USA       |
| SAMN08395649 | GCA_004635465.1 | J402 | 2015 | USA       |
| SAMN08443705 | SRR8372602      | Y178 | 2013 | Australia |
| SAMN08443706 | SRR8372601      | Y019 | 2013 | Australia |
| SAMN08443707 | SRR8372600      | Y020 | 2013 | Australia |
| SAMN08443708 | SRR8372599      | Y065 | 2013 | Australia |
| SAMN08443709 | SRR8372614      | Y145 | 2013 | Australia |
| SAMN08443710 | SRR8372613      | Y335 | 2013 | Australia |
| SAMN08443711 | SRR8652755      | Y275 | 2013 | Australia |
| SAMN08443712 | SRR8652792      | Y235 | 2013 | Australia |
| SAMN08443713 | SRR8652742      | Y124 | 2013 | Australia |
| SAMN08443714 | SRR8652793      | Y317 | 2013 | Australia |
| SAMN08443715 | SRR8652794      | Y258 | 2013 | Australia |
| SAMN08443716 | SRR8652786      | Y224 | 2013 | Australia |
| SAMN08443717 | SRR8652785      | Z020 | 2014 | Australia |
| SAMN08443718 | SRR8652788      | Y397 | 2013 | Australia |
| SAMN08443719 | SRR8652787      | Y663 | 2013 | Australia |
| SAMN08443720 | SRR8652782      | Y627 | 2013 | Australia |
| SAMN08443721 | SRR8372288      | Y475 | 2013 | Australia |
| SAMN08443722 | SRR8372285      | Y354 | 2013 | Australia |
| SAMN08443723 | SRR8372296      | Y664 | 2013 | Australia |
| SAMN08443724 | SRR8372286      | Y157 | 2013 | Australia |
| SAMN08443725 | SRR8372631      | Y594 | 2013 | Australia |
| SAMN08443726 | SRR8372632      | Y548 | 2013 | Australia |
| SAMN08443727 | SRR8372629      | Y527 | 2013 | Australia |
| SAMN08443728 | SRR8372630      | Z021 | 2014 | Australia |

|              |            |           |      |           |
|--------------|------------|-----------|------|-----------|
| SAMN08443729 | SRR8372627 | Y626      | 2013 | Australia |
| SAMN08443730 | SRR8652784 | Y575      | 2013 | Australia |
| SAMN08443731 | SRR8372628 | Y493      | 2013 | Australia |
| SAMN08443732 | SRR8372638 | Z022      | 2014 | Australia |
| SAMN08443733 | SRR8652783 | Z106      | 2014 | Australia |
| SAMN08443734 | SRR8652795 | Z074      | 2014 | Australia |
| SAMN08443735 | SRR8652789 | Z057      | 2014 | Australia |
| SAMN08443736 | SRR8652790 | Z056      | 2014 | Australia |
| SAMN08443737 | DRR165176  | Z075      | 2014 | Australia |
| SAMN08443738 | DRR165177  | SSCC65947 | 2016 | Australia |
| SAMN08443739 | DRR165178  | SSCC65427 | 2016 | Australia |
| SAMN08443740 | DRR165179  | SSCC65037 | 2016 | Australia |
| SAMN08443741 | DRR165180  | Z619      | 2015 | Australia |
| SAMN08443742 | DRR165181  | Z618      | 2015 | Australia |
| SAMN08443743 | DRR165182  | SSCC65428 | 2016 | Australia |
| SAMN08443744 | DRR165183  | SSCC65426 | 2016 | Australia |
| SAMN08443745 | DRR165184  | Z664      | 2015 | Australia |
| SAMN08443746 | SRR8652739 | Z390      | 2014 | Australia |
| SAMN08443747 | SRR8372639 | Z357      | 2014 | Australia |
| SAMN08443748 | DRR165185  | Z177      | 2014 | Australia |
| SAMN08443750 | DRR165187  | Z425      | 2014 | Australia |
| SAMN08443751 | DRR165188  | Z537      | 2014 | Australia |
| SAMN08443752 | DRR165189  | Z558      | 2015 | Australia |
| SAMN08443753 | DRR165190  | Z347      | 2014 | Australia |
| SAMN08443754 | DRR165191  | Z663      | 2015 | Australia |
| SAMN08443756 | DRR165193  | Z557      | 2015 | Australia |
| SAMN08443757 | SRR8372294 | Z568      | 2015 | Australia |
| SAMN08443759 | DRR165195  | BP2       | 2015 | Australia |
| SAMN08443760 | SRR8372634 | BP3       | 2015 | Australia |
| SAMN08443761 | SRR8372633 | BP4       | 2015 | Australia |
| SAMN08443762 | SRR8372637 | BP5       | 2015 | Australia |
| SAMN08443763 | SRR8372636 | BP6       | 2015 | Australia |
| SAMN08443764 | SRR8652740 | BP7       | 2015 | Australia |
| SAMN08443765 | SRR8372262 | BP8       | 2015 | Australia |
| SAMN08443766 | SRR8372648 | BP9       | 2015 | Australia |
| SAMN08443767 | SRR8372649 | BP10      | 2015 | Australia |
| SAMN08443768 | SRR8372646 | BP11      | 2015 | Australia |
| SAMN08443769 | SRR8372647 | BP12      | 2015 | Australia |
| SAMN08443770 | SRR8372644 | BP13      | 2016 | Australia |
| SAMN08443771 | SRR8372645 | BP14      | 2016 | Australia |
| SAMN08443772 | SRR8372642 | BP15      | 2016 | Australia |
| SAMN08443773 | SRR8372643 | BP16      | 2016 | Australia |
| SAMN08443774 | SRR8372295 | BP17      | 2016 | Australia |

|              |                 |            |      |           |
|--------------|-----------------|------------|------|-----------|
| SAMN08443775 | SRR8652757      | SSCC_67089 | 2016 | Australia |
| SAMN08443776 | SRR8372640      | SSCC_68625 | 2016 | Australia |
| SAMN08443777 | SRR8372641      | SSCC_69464 | 2017 | Australia |
| SAMN08443778 | SRR8372272      | SSCC_69629 | 2017 | Australia |
| SAMN08443779 | SRR8372625      | SSCC_70086 | 2017 | Australia |
| SAMN08443780 | SRR8372626      | SSCC_71252 | 2017 | Australia |
| SAMN08443781 | SRR8372264      | SSCC_71863 | 2017 | Australia |
| SAMN08443782 | SRR8372265      | SSCC_71864 | 2017 | Australia |
| SAMN08469391 | SRR9006127      | A339       | 1995 | USA       |
| SAMN08469392 | GCA_004636205.1 | J362       | 2014 | USA       |
| SAMN08469393 | SRR9006139      | J368       | 2014 | USA       |
| SAMN08469394 | SRR9006148      | J374       | 2014 | USA       |
| SAMN08469395 | SRR9002878      | J378       | 2015 | USA       |
| SAMN08469396 | SRR9002879      | J386       | 2015 | USA       |
| SAMN08469397 | SRR9006181      | J424       | 2015 | USA       |
| SAMN08469398 | SRR9006187      | J522       | 2015 | USA       |
| SAMN08469399 | SRR9006186      | J523       | 2015 | USA       |
| SAMN08469400 | SRR9006185      | J524       | 2015 | USA       |
| SAMN08469401 | SRR9006180      | J525       | 2015 | USA       |
| SAMN08469402 | SRR9006203      | J527       | 2016 | USA       |
| SAMN08469403 | SRR9006204      | J528       | 2016 | USA       |
| SAMN08469404 | SRR9006205      | J529       | 2016 | USA       |
| SAMN08469405 | SRR9006236      | J632       | 2016 | USA       |
| SAMN08469406 | SRR9006233      | J650       | 2016 | USA       |
| SAMN08469407 | SRR9002858      | J673       | 2016 | USA       |
| SAMN08471222 | SRR9006140      | J369       | 2014 | USA       |
| SAMN08471223 | SRR9006138      | J372       | 2014 | USA       |
| SAMN08471224 | SRR9006147      | J373       | 2014 | USA       |
| SAMN08471225 | SRR9002873      | J375       | 2014 | USA       |
| SAMN08471226 | SRR9002877      | J379       | 2015 | USA       |
| SAMN08471227 | SRR9002871      | J390       | 2015 | USA       |
| SAMN08471228 | SRR9006179      | J526       | 2015 | USA       |
| SAMN08524445 | SRR9006122      | J092       | 2014 | USA       |
| SAMN08524446 | SRR9006123      | J118       | 2014 | USA       |
| SAMN08524447 | SRR9006124      | J129       | 2014 | USA       |
| SAMN08524448 | SRR9006125      | J130       | 2014 | USA       |
| SAMN08524449 | SRR9006126      | J132       | 2014 | Haiti     |
| SAMN08524450 | SRR9006162      | J233       | 2014 | USA       |
| SAMN08524451 | SRR9006206      | J546       | 2016 | USA       |
| SAMN08524452 | SRR9006199      | J549       | 2016 | USA       |
| SAMN08524453 | SRR9006200      | J567       | 2016 | USA       |
| SAMN08524454 | SRR9006201      | J571       | 2016 | USA       |
| SAMN08524455 | SRR9006202      | J582       | 2016 | USA       |

|              |                 |        |      |                |
|--------------|-----------------|--------|------|----------------|
| SAMN08524456 | SRR9006207      | J586   | 2016 | USA            |
| SAMN08524457 | SRR9006208      | J588   | 2016 | USA            |
| SAMN08524458 | SRR9002885      | J589   | 2016 | USA            |
| SAMN08524459 | SRR9006228      | J603   | 2016 | USA            |
| SAMN08524460 | SRR9002884      | J604   | 2016 | USA            |
| SAMN08524461 | SRR9002883      | J605   | 2016 | USA            |
| SAMN08524462 | SRR9006227      | J606   | 2016 | USA            |
| SAMN08524463 | SRR9006231      | J614   | 2016 | USA            |
| SAMN08524464 | SRR9006232      | J616   | 2016 | USA            |
| SAMN08524465 | GCA_004635805.1 | J617   | 2016 | USA            |
| SAMN08524466 | SRR9006235      | J628   | 2016 | USA            |
| SAMN08524467 | SRR9006234      | J656   | 2016 | USA            |
| SAMN08524468 | SRR9006238      | J662   | 2016 | USA            |
| SAMN08524469 | SRR9006237      | J667   | 2016 | USA            |
| SAMN08524470 | SRR9002859      | J679   | 2016 | USA            |
| SAMN08524471 | SRR9002856      | J680   | 2016 | USA            |
| SAMN08524472 | SRR9002857      | J682   | 2016 | USA            |
| SAMN08524473 | SRR9002854      | J683   | 2016 | USA            |
| SAMN08524474 | SRR9002882      | J687   | 2016 | USA            |
| SAMN08524475 | SRR9002881      | J690   | 2016 | USA            |
| SAMN08524476 | SRR9002903      | J691   | 2016 | USA            |
| SAMN08524477 | SRR9002904      | J692   | 2016 | USA            |
| SAMN08524478 | SRR9002905      | J693   | 2016 | USA            |
| SAMN08524479 | SRR9002906      | J695   | 2016 | USA            |
| SAMN08524480 | SRR9002907      | J697   | 2016 | USA            |
| SAMN08524481 | SRR9002908      | J698   | 2016 | USA            |
| SAMN08524482 | SRR9002909      | J699   | 2016 | USA            |
| SAMN08524483 | SRR9002910      | J700   | 2016 | USA            |
| SAMN08524484 | SRR9002855      | J702   | 2016 | USA            |
| SAMN08524485 | SRR9002819      | J703   | 2016 | USA            |
| SAMN08944575 | ERR1775277      | IR80   | 2013 | Iran           |
| SAMN08944576 | ERR1775278      | IR80   | 2013 | Iran           |
| SAMN09500966 | ERR1775212      | UK36   | 2012 | United_Kingdom |
| SAMN09500967 | ERR1775213      | UK38   | 2012 | United_Kingdom |
| SAMN09500968 | ERR1775214      | UK39   | 2012 | United_Kingdom |
| SAMN09500969 | ERR1775215      | UK48   | 2012 | United_Kingdom |
| SAMN09500970 | ERR1775216      | UK76   | 2012 | United_Kingdom |
| SAMN09721533 | GCA_003355025.1 | UK36   | 2012 | United_Kingdom |
| SAMN09721534 | GCA_003355045.1 | UK38   | 2012 | United_Kingdom |
| SAMN09721535 | GCA_003355065.1 | UK39   | 2012 | United_Kingdom |
| SAMN09721536 | GCA_003367275.1 | UK48   | 2012 | United_Kingdom |
| SAMN09721537 | GCA_003355085.1 | UK76   | 2012 | United_Kingdom |
| SAMN09862822 | ERR1775273      | Tohama | 1954 | Japan          |



|              |            |        |      |        |
|--------------|------------|--------|------|--------|
| SAMN09862835 | ERR1775274 | FR5810 | 2014 | France |
| SAMN09947456 | SRR8652761 | L12030 | 2012 | China  |
| SAMN09947457 | SRR8652772 | L12072 | 2012 | China  |
| SAMN09947458 | SRR8652768 | L12152 | 2012 | China  |
| SAMN09947459 | SRR8652762 | L13030 | 2013 | China  |
| SAMN09947460 | SRR8652759 | L13038 | 2013 | China  |
| SAMN09947463 | SRR8652737 | L13118 | 2013 | China  |
| SAMN09947464 | SRR8652738 | L13159 | 2013 | China  |
| SAMN09947465 | SRR8652756 | L14018 | 2014 | China  |
| SAMN09947466 | SRR8652733 | L14050 | 2014 | China  |
| SAMN09947467 | SRR8652734 | L14114 | 2014 | China  |
| SAMN09947468 | SRR8652735 | L14149 | 2014 | China  |
| SAMN09947469 | SRR8652736 | L14179 | 2014 | China  |
| SAMN09947470 | SRR8652769 | L14182 | 2014 | China  |
| SAMN09947471 | SRR8652774 | L14184 | 2014 | China  |
| SAMN09947472 | SRR8652773 | L14233 | 2014 | China  |
| SAMN09947473 | SRR8652729 | L14238 | 2014 | China  |
| SAMN09947474 | SRR8652727 | L14260 | 2014 | China  |
| SAMN09947475 | SRR8652731 | L14280 | 2014 | China  |
| SAMN09947476 | SRR8652732 | L14298 | 2014 | China  |
| SAMN09947477 | SRR8652780 | L14302 | 2014 | China  |
| SAMN09947478 | SRR8652779 | L14394 | 2014 | China  |
| SAMN09947479 | SRR8652728 | L14401 | 2014 | China  |
| SAMN09947480 | SRR8652722 | L14404 | 2014 | China  |
| SAMN09947481 | SRR8652730 | L15022 | 2015 | China  |
| SAMN09947482 | SRR8652725 | L15023 | 2015 | China  |
| SAMN09947483 | SRR8652758 | L15048 | 2015 | China  |
| SAMN09947484 | SRR8652770 | L15053 | 2015 | China  |
| SAMN09947485 | SRR8652726 | L15080 | 2015 | China  |
| SAMN09947486 | SRR8652719 | L15101 | 2015 | China  |
| SAMN09947487 | SRR8372616 | L15108 | 2015 | China  |
| SAMN09947488 | SRR8372624 | L15116 | 2015 | China  |
| SAMN09947489 | SRR8372622 | L15121 | 2015 | China  |
| SAMN09947490 | SRR8372623 | L15141 | 2015 | China  |
| SAMN09947491 | SRR8372617 | L15189 | 2015 | China  |
| SAMN09947492 | SRR8372618 | L15221 | 2015 | China  |
| SAMN09947493 | SRR8372621 | L15249 | 2015 | China  |
| SAMN09947494 | SRR8372611 | L15306 | 2015 | China  |
| SAMN09947495 | SRR8372612 | L15316 | 2015 | China  |
| SAMN09947496 | SRR8372609 | L15360 | 2015 | China  |
| SAMN09947497 | SRR8372610 | L15466 | 2015 | China  |
| SAMN09947498 | SRR8372607 | L15495 | 2015 | China  |
| SAMN09947499 | SRR8372608 | L15497 | 2015 | China  |

|              |            |        |      |       |
|--------------|------------|--------|------|-------|
| SAMN09947500 | SRR8372619 | L15556 | 2015 | China |
| SAMN09947501 | SRR8372620 | L15581 | 2015 | China |
| SAMN09947502 | SRR8372615 | L15592 | 2015 | China |
| SAMN09947503 | SRR8372606 | L15690 | 2015 | China |
| SAMN09947504 | SRR8372605 | L15711 | 2015 | China |
| SAMN09947505 | SRR8372604 | L15803 | 2015 | China |
| SAMN10161199 | SRR9118476 | J196   | 2014 | USA   |
| SAMN10161200 | SRR9118482 | J318   | 2015 | USA   |
| SAMN10161201 | SRR9118481 | J321   | 2015 | USA   |
| SAMN10161202 | SRR9006067 | J475   | 2016 | USA   |
| SAMN10161203 | SRR9118390 | J476   | 2016 | USA   |
| SAMN10161204 | SRR9118391 | J477   | 2016 | USA   |
| SAMN10161205 | SRR9118394 | J487   | 2016 | USA   |
| SAMN10161206 | SRR9131639 | J493   | 2016 | USA   |
| SAMN10161207 | SRR9131640 | J494   | 2016 | USA   |
| SAMN10161208 | SRR9131641 | J495   | 2016 | USA   |
| SAMN10161209 | SRR9131642 | J496   | 2016 | USA   |
| SAMN10161210 | SRR9131635 | J497   | 2016 | USA   |
| SAMN10161211 | SRR9131574 | J591   | 2016 | USA   |
| SAMN10161212 | SRR9131577 | J592   | 2016 | USA   |
| SAMN10161213 | SRR9131579 | J595   | 2016 | USA   |
| SAMN10161214 | SRR9131265 | J597   | 2016 | USA   |
| SAMN10161215 | SRR9131289 | J598   | 2016 | USA   |
| SAMN10161216 | SRR9131288 | J600   | 2015 | USA   |
| SAMN10161217 | SRR9131287 | J601   | 2015 | USA   |
| SAMN10161218 | SRR9131691 | J608   | 2016 | USA   |
| SAMN10161219 | SRR9131285 | J609   | 2016 | USA   |
| SAMN10161220 | SRR9131284 | J610   | 2016 | USA   |
| SAMN10161221 | SRR9131283 | J612   | 2016 | USA   |
| SAMN10161222 | SRR9131607 | J618   | 2016 | USA   |
| SAMN10161223 | SRR9131282 | J619   | 2016 | USA   |
| SAMN10161224 | SRR9131598 | J620   | 2016 | USA   |
| SAMN10161225 | SRR9131563 | J622   | 2016 | USA   |
| SAMN10161226 | SRR9131696 | J623   | 2016 | USA   |
| SAMN10161227 | SRR9131693 | J631   | 2016 | USA   |
| SAMN10161228 | SRR9131721 | J638   | 2016 | USA   |
| SAMN10176190 | SRR9118418 | J261   | 2014 | USA   |
| SAMN10176191 | SRR9118421 | J271   | 2014 | USA   |
| SAMN10176192 | SRR9118420 | J273   | 2014 | USA   |
| SAMN10176193 | SRR9118417 | J314   | 2015 | USA   |
| SAMN10176194 | SRR9118416 | J315   | 2015 | USA   |
| SAMN10176195 | SRR9118484 | J316   | 2015 | USA   |
| SAMN10176196 | SRR9118485 | J317   | 2015 | USA   |

|              |            |      |      |     |
|--------------|------------|------|------|-----|
| SAMN10176197 | SRR9118483 | J319 | 2015 | USA |
| SAMN10176198 | SRR9118437 | J341 | 2015 | USA |
| SAMN10176204 | SRR9118405 | J383 | 2015 | USA |
| SAMN10176205 | SRR9118393 | J388 | 2015 | USA |
| SAMN10176213 | SRR9006133 | J410 | 2015 | USA |
| SAMN10176214 | SRR9006131 | J421 | 2015 | USA |
| SAMN10176215 | SRR9118475 | J422 | 2015 | USA |
| SAMN10176216 | SRR9118448 | J433 | 2015 | USA |
| SAMN10176217 | SRR9118450 | J435 | 2015 | USA |
| SAMN10176218 | SRR9118451 | J436 | 2015 | USA |
| SAMN10176219 | SRR9118453 | J438 | 2015 | USA |
| SAMN10176221 | SRR9118436 | J451 | 2016 | USA |
| SAMN10176222 | SRR9118446 | J452 | 2016 | USA |
| SAMN10176223 | SRR9006068 | J453 | 2016 | USA |
| SAMN10176224 | SRR9006069 | J454 | 2016 | USA |
| SAMN10176225 | SRR9006070 | J455 | 2015 | USA |
| SAMN10176226 | SRR9006071 | J457 | 2015 | USA |
| SAMN10176227 | SRR9006055 | J458 | 2015 | USA |
| SAMN10176228 | SRR9006058 | J459 | 2015 | USA |
| SAMN10176229 | SRR9006064 | J460 | 2016 | USA |
| SAMN10176230 | SRR9006092 | J461 | 2016 | USA |
| SAMN10176231 | SRR9006093 | J462 | 2016 | USA |
| SAMN10176961 | SRR9131623 | J704 | 2016 | USA |
| SAMN10176962 | SRR9131622 | J705 | 2016 | USA |
| SAMN10176963 | SRR9131621 | J706 | 2016 | USA |
| SAMN10176964 | SRR9131701 | J736 | 2017 | USA |
| SAMN10176965 | SRR9131699 | J738 | 2017 | USA |
| SAMN10176966 | SRR9131358 | J743 | 2017 | USA |
| SAMN10176967 | SRR9131359 | J744 | 2017 | USA |
| SAMN10176968 | SRR9131330 | J745 | 2017 | USA |
| SAMN10176969 | SRR9131329 | J746 | 2017 | USA |
| SAMN10176970 | SRR9131328 | J747 | 2017 | USA |
| SAMN10176971 | SRR9131327 | J748 | 2017 | USA |
| SAMN10176972 | SRR9131559 | J751 | 2017 | USA |
| SAMN10176973 | SRR9131560 | J752 | 2017 | USA |
| SAMN10176974 | SRR9131561 | J753 | 2017 | USA |
| SAMN10176975 | SRR9131583 | J755 | 2017 | USA |
| SAMN10176976 | SRR9131552 | J758 | 2017 | USA |
| SAMN10176977 | SRR9131551 | J759 | 2017 | USA |
| SAMN10176978 | SRR9131615 | J760 | 2017 | USA |
| SAMN10176979 | SRR9131609 | J761 | 2017 | USA |
| SAMN10176980 | SRR9131614 | J762 | 2017 | USA |
| SAMN10176981 | SRR9131612 | J764 | 2017 | USA |

|              |            |      |      |     |
|--------------|------------|------|------|-----|
| SAMN10176982 | SRR9131645 | J766 | 2017 | USA |
| SAMN10176983 | SRR9131683 | J780 | 2017 | USA |
| SAMN10176984 | SRR9131549 | J781 | 2017 | USA |
| SAMN10176985 | SRR9131580 | J782 | 2017 | USA |
| SAMN10182667 | SRR9131613 | J763 | 2017 | USA |
| SAMN10182668 | SRR9131301 | J783 | 2017 | USA |
| SAMN10182669 | SRR9131684 | J797 | 2017 | USA |
| SAMN10182670 | SRR9131673 | J798 | 2017 | USA |
| SAMN10182671 | SRR9131324 | J799 | 2017 | USA |
| SAMN10182672 | SRR9131323 | J800 | 2017 | USA |
| SAMN10182673 | SRR9131337 | J801 | 2017 | USA |
| SAMN10182674 | SRR9988844 | J802 | 2017 | USA |
| SAMN10182675 | SRR9988843 | J803 | 2017 | USA |
| SAMN10182676 | SRR9988823 | J804 | 2017 | USA |
| SAMN10182677 | SRR9988824 | J805 | 2017 | USA |
| SAMN10182678 | SRR9131669 | J810 | 2017 | USA |
| SAMN10182679 | SRR9131670 | J811 | 2017 | USA |
| SAMN10182680 | SRR9131654 | J812 | 2017 | USA |
| SAMN10182681 | SRR9131655 | J813 | 2017 | USA |
| SAMN10182682 | SRR9131651 | J816 | 2017 | USA |
| SAMN10182683 | SRR9131653 | J819 | 2017 | USA |
| SAMN10182684 | SRR9988825 | J836 | 2017 | USA |
| SAMN10182685 | SRR9988826 | J837 | 2017 | USA |
| SAMN10182686 | SRR9988827 | J844 | 2017 | USA |
| SAMN10182687 | SRR9988828 | J846 | 2017 | USA |
| SAMN10182688 | SRR9988776 | J847 | 2017 | USA |
| SAMN10182689 | SRR9988771 | J848 | 2017 | USA |
| SAMN10182690 | SRR9988772 | J849 | 2017 | USA |
| SAMN10182691 | SRR9988800 | J851 | 2017 | USA |
| SAMN10182692 | SRR9988829 | J852 | 2017 | USA |
| SAMN10182693 | SRR9988830 | J853 | 2017 | USA |
| SAMN10182694 | SRR9988799 | J854 | 2017 | USA |
| SAMN10182695 | SRR9988821 | J855 | 2017 | USA |
| SAMN10182696 | SRR9988798 | J856 | 2017 | USA |
| SAMN10182697 | SRR9997308 | J866 | 2017 | USA |
| SAMN10182698 | SRR9997307 | J867 | 2017 | USA |
| SAMN10182699 | SRR9997306 | J876 | 2017 | USA |
| SAMN10182700 | SRR9997304 | J878 | 2017 | USA |
| SAMN10182701 | SRR9997303 | J879 | 2017 | USA |
| SAMN10182702 | SRR9988729 | J880 | 2017 | USA |
| SAMN10182703 | SRR9988731 | J881 | 2017 | USA |
| SAMN10182704 | SRR9988730 | J882 | 2017 | USA |
| SAMN10182705 | SRR9988733 | J883 | 2017 | USA |

|              |            |      |      |     |
|--------------|------------|------|------|-----|
| SAMN10182706 | SRR9988796 | J884 | 2017 | USA |
| SAMN10182707 | SRR9988795 | J885 | 2017 | USA |
| SAMN10182708 | SRR9988794 | J886 | 2017 | USA |
| SAMN10182709 | SRR9988793 | J887 | 2017 | USA |
| SAMN10182710 | SRR9988792 | J888 | 2017 | USA |
| SAMN10182711 | SRR9988791 | J889 | 2017 | USA |
| SAMN10182712 | SRR9988782 | J890 | 2017 | USA |
| SAMN10182713 | SRR9988781 | J907 | 2017 | USA |
| SAMN10182714 | SRR9988784 | J908 | 2017 | USA |
| SAMN10182715 | SRR9988783 | J910 | 2017 | USA |
| SAMN10182716 | SRR9988743 | J911 | 2017 | USA |
| SAMN10182717 | SRR9988822 | J912 | 2017 | USA |
| SAMN10182718 | SRR9988756 | J914 | 2017 | USA |
| SAMN10182719 | SRR9860850 | J970 | 2017 | USA |
| SAMN10182720 | SRR9860851 | J971 | 2017 | USA |
| SAMN10182721 | SRR9860848 | J972 | 2017 | USA |
| SAMN10182722 | SRR9860849 | J980 | 2017 | USA |
| SAMN10182723 | SRR9988755 | J982 | 2017 | USA |
| SAMN10182724 | SRR9988815 | K003 | 2017 | USA |
| SAMN10182725 | SRR9988816 | K004 | 2017 | USA |
| SAMN10182726 | SRR9988817 | K007 | 2017 | USA |
| SAMN10182727 | SRR9988811 | K008 | 2017 | USA |
| SAMN10182728 | SRR9988812 | K011 | 2017 | USA |
| SAMN10182729 | SRR9988777 | K012 | 2017 | USA |
| SAMN10182730 | SRR9988778 | K013 | 2017 | USA |
| SAMN10182731 | SRR9988779 | K014 | 2017 | USA |
| SAMN10182732 | SRR9988780 | K015 | 2017 | USA |
| SAMN10182733 | SRR9988785 | K018 | 2017 | USA |
| SAMN10182734 | SRR9988788 | K019 | 2017 | USA |
| SAMN10182735 | SRR9988787 | K024 | 2018 | USA |
| SAMN10182736 | SRR9988790 | K025 | 2018 | USA |
| SAMN10182737 | SRR9988789 | K026 | 2018 | USA |
| SAMN10182738 | SRR9988803 | K027 | 2018 | USA |
| SAMN10298211 | SRR9997313 | NA   | 1995 | USA |
| SAMN10298212 | SRR9123563 | NA   | 2012 | USA |
| SAMN10298213 | SRR9123653 | NA   | 2012 | USA |
| SAMN10298216 | SRR9118398 | NA   | 2014 | USA |
| SAMN10298217 | SRR9006132 | NA   | 2015 | USA |
| SAMN10298218 | SRR9118469 | NA   | 2015 | USA |
| SAMN10298219 | SRR9118452 | NA   | 2015 | USA |
| SAMN10298220 | SRR9118456 | NA   | 2016 | USA |
| SAMN10298221 | SRR9131722 | NA   | 2016 | USA |
| SAMN10298222 | SRR9131616 | NA   | 2016 | USA |

|              |                 |                |      |       |
|--------------|-----------------|----------------|------|-------|
| SAMN10298223 | SRR9988797      | NA             | 2017 | USA   |
| SAMN10298224 | SRR9988813      | NA             | 2017 | USA   |
| SAMN10298225 | SRR9988814      | NA             | 2017 | USA   |
| SAMN10525643 | GCA_004102005.1 | BP_165         | 1977 | India |
| SAMN10650627 | SRR8372509      | not_applicable | NA   | China |
| SAMN10650628 | SRR8372516      | not_applicable | NA   | China |
| SAMN10650629 | SRR8372515      | not_applicable | NA   | China |
| SAMN10650631 | SRR8372312      | not_applicable | NA   | China |
| SAMN10650632 | SRR8372311      | not_applicable | NA   | China |
| SAMN10650633 | SRR8372513      | not_applicable | NA   | China |
| SAMN10650634 | ERR2658138      | not_applicable | NA   | China |
| SAMN10650635 | SRR8372306      | not_applicable | NA   | China |
| SAMN10650636 | SRR8372305      | not_applicable | NA   | China |
| SAMN10650637 | ERR2658139      | not_applicable | NA   | China |
| SAMN10650638 | ERR2658140      | not_applicable | NA   | China |
| SAMN10650639 | ERR2658141      | not_applicable | NA   | China |
| SAMN10650640 | ERR2658142      | not_applicable | NA   | China |
| SAMN10650641 | ERR2658143      | not_applicable | NA   | China |
| SAMN10650642 | ERR2658144      | not_applicable | NA   | China |
| SAMN10650645 | ERR1775275      | not_applicable | NA   | China |
| SAMN10650646 | ERR1775276      | not_applicable | NA   | China |
| SAMN10650649 | SRR8372561      | not_applicable | NA   | China |
| SAMN10650651 | SRR8372559      | not_applicable | NA   | China |
| SAMN10650652 | SRR8372558      | not_applicable | NA   | China |
| SAMN10650653 | SRR8372308      | not_applicable | NA   | China |
| SAMN10650654 | SRR8372557      | not_applicable | NA   | China |
| SAMN10650655 | SRR8372556      | not_applicable | NA   | China |
| SAMN10650657 | SRR8372457      | not_applicable | NA   | China |
| SAMN10650658 | SRR8372458      | not_applicable | NA   | China |
| SAMN10650659 | SRR8372370      | not_applicable | NA   | China |
| SAMN10650660 | SRR8372369      | not_applicable | NA   | China |
| SAMN10650661 | SRR8372459      | not_applicable | NA   | China |
| SAMN10650662 | SRR8372460      | not_applicable | NA   | China |
| SAMN10650663 | SRR8372453      | not_applicable | NA   | China |
| SAMN10650664 | SRR8372454      | not_applicable | NA   | China |
| SAMN10650665 | SRR8372372      | not_applicable | NA   | China |
| SAMN10650666 | SRR8372371      | not_applicable | NA   | China |
| SAMN10650668 | SRR8372302      | not_applicable | NA   | China |
| SAMN10650669 | SRR8372316      | not_applicable | NA   | China |
| SAMN10650670 | SRR8372317      | not_applicable | NA   | China |
| SAMN10650671 | SRR8372318      | not_applicable | NA   | China |
| SAMN10650674 | SRR8372321      | not_applicable | NA   | China |
| SAMN10650675 | SRR8372322      | not_applicable | NA   | China |

|              |            |                |    |       |
|--------------|------------|----------------|----|-------|
| SAMN10650677 | SRR1958808 | not_applicable | NA | China |
| SAMN10650678 | SRR1958816 | not_applicable | NA | China |
| SAMN10650679 | SRR1958802 | not_applicable | NA | China |
| SAMN10650680 | SRR1958804 | not_applicable | NA | China |
| SAMN10650681 | SRR1958800 | not_applicable | NA | China |
| SAMN10650683 | SRR1958801 | not_applicable | NA | China |
| SAMN10650684 | SRR1958805 | not_applicable | NA | China |
| SAMN10650685 | SRR1958817 | not_applicable | NA | China |
| SAMN10650686 | SRR1958818 | not_applicable | NA | China |
| SAMN10650687 | SRR8372554 | not_applicable | NA | China |
| SAMN10650688 | SRR8372263 | not_applicable | NA | China |
| SAMN10650689 | SRR8372455 | not_applicable | NA | China |
| SAMN10650690 | SRR8372456 | not_applicable | NA | China |
| SAMN10650691 | SRR8372465 | not_applicable | NA | China |
| SAMN10650692 | SRR8372466 | not_applicable | NA | China |
| SAMN10650693 | SRR8372440 | not_applicable | NA | China |
| SAMN10650694 | SRR8372439 | not_applicable | NA | China |
| SAMN10650695 | SRR8372518 | not_applicable | NA | China |
| SAMN10650696 | SRR8372324 | not_applicable | NA | China |
| SAMN10650697 | SRR8372563 | not_applicable | NA | China |
| SAMN10650698 | SRR8372562 | not_applicable | NA | China |
| SAMN10650699 | SRR8372401 | not_applicable | NA | China |
| SAMN10650700 | SRR8372402 | not_applicable | NA | China |
| SAMN10650701 | SRR8372567 | not_applicable | NA | China |
| SAMN10650702 | SRR8372566 | not_applicable | NA | China |
| SAMN10650703 | SRR8372403 | not_applicable | NA | China |
| SAMN10650704 | SRR8372404 | not_applicable | NA | China |
| SAMN10650705 | SRR8372565 | not_applicable | NA | China |
| SAMN10650706 | SRR8372564 | not_applicable | NA | China |
| SAMN10650707 | SRR8372268 | not_applicable | NA | China |
| SAMN10650708 | SRR8372325 | not_applicable | NA | China |
| SAMN10650709 | SRR8372269 | not_applicable | NA | China |
| SAMN10650710 | SRR8372266 | not_applicable | NA | China |
| SAMN10650711 | SRR1958819 | not_applicable | NA | China |
| SAMN10650712 | SRR1958820 | not_applicable | NA | China |
| SAMN10650713 | SRR8372340 | not_applicable | NA | China |
| SAMN10650714 | SRR1958821 | not_applicable | NA | China |
| SAMN10650715 | SRR8372267 | not_applicable | NA | China |
| SAMN10650716 | SRR8372270 | not_applicable | NA | China |
| SAMN10650717 | SRR8372397 | not_applicable | NA | China |
| SAMN10650718 | SRR8372398 | not_applicable | NA | China |
| SAMN10650719 | SRR8372399 | not_applicable | NA | China |
| SAMN10650720 | SRR8372271 | not_applicable | NA | China |

|              |            |                |    |       |
|--------------|------------|----------------|----|-------|
| SAMN10650721 | SRR8372400 | not_applicable | NA | China |
| SAMN10650722 | SRR8372405 | not_applicable | NA | China |
| SAMN10650723 | SRR8372406 | not_applicable | NA | China |
| SAMN10650724 | SRR8372394 | not_applicable | NA | China |
| SAMN10650725 | SRR8372393 | not_applicable | NA | China |
| SAMN10650726 | SRR8372396 | not_applicable | NA | China |
| SAMN10650729 | SRR8372498 | not_applicable | NA | China |
| SAMN10650730 | SRR8372486 | not_applicable | NA | China |
| SAMN10650731 | SRR8372485 | not_applicable | NA | China |
| SAMN10650732 | SRR8372490 | not_applicable | NA | China |
| SAMN10650733 | SRR8372522 | not_applicable | NA | China |
| SAMN10650734 | SRR8372525 | not_applicable | NA | China |
| SAMN10650735 | SRR8372442 | not_applicable | NA | China |
| SAMN10650736 | SRR8372441 | not_applicable | NA | China |
| SAMN10650738 | SRR1958798 | not_applicable | NA | China |
| SAMN10650740 | SRR1958806 | not_applicable | NA | China |
| SAMN10650741 | SRR1958807 | not_applicable | NA | China |
| SAMN10650742 | SRR1958809 | not_applicable | NA | China |
| SAMN10650743 | SRR1958810 | not_applicable | NA | China |
| SAMN10650744 | SRR1958812 | not_applicable | NA | China |
| SAMN10650745 | SRR1958813 | not_applicable | NA | China |
| SAMN10650746 | SRR1958814 | not_applicable | NA | China |
| SAMN10650747 | SRR8372299 | not_applicable | NA | China |
| SAMN10650748 | SRR8372300 | not_applicable | NA | China |
| SAMN10650749 | SRR8372571 | not_applicable | NA | China |
| SAMN10650750 | SRR8372297 | not_applicable | NA | China |
| SAMN10650751 | SRR8372298 | not_applicable | NA | China |
| SAMN10650752 | SRR8372303 | not_applicable | NA | China |
| SAMN10650753 | SRR8372304 | not_applicable | NA | China |
| SAMN10650754 | SRR8372301 | not_applicable | NA | China |
| SAMN10650755 | SRR8372338 | not_applicable | NA | China |
| SAMN10650756 | SRR8372339 | not_applicable | NA | China |
| SAMN10650757 | SRR8372444 | not_applicable | NA | China |
| SAMN10650758 | SRR8372443 | not_applicable | NA | China |
| SAMN10650759 | SRR8372436 | not_applicable | NA | China |
| SAMN10650760 | SRR8372434 | not_applicable | NA | China |
| SAMN10650761 | SRR8372438 | not_applicable | NA | China |
| SAMN10650762 | SRR8372471 | not_applicable | NA | China |
| SAMN10650763 | SRR8372437 | not_applicable | NA | China |
| SAMN10650764 | SRR8372469 | not_applicable | NA | China |
| SAMN10650765 | SRR8372470 | not_applicable | NA | China |
| SAMN10650766 | SRR8372472 | not_applicable | NA | China |
| SAMN10650767 | SRR8372473 | not_applicable | NA | China |



|              |            |                |    |       |
|--------------|------------|----------------|----|-------|
| SAMN10650768 | SRR8372474 | not_applicable | NA | China |
| SAMN10650769 | SRR8372475 | not_applicable | NA | China |
| SAMN10650770 | SRR8372476 | not_applicable | NA | China |
| SAMN10650771 | SRR8372433 | not_applicable | NA | China |
| SAMN10650772 | SRR8372435 | not_applicable | NA | China |
| SAMN10650773 | SRR8372428 | not_applicable | NA | China |
| SAMN10650774 | SRR8372429 | not_applicable | NA | China |
| SAMN10650775 | SRR8372430 | not_applicable | NA | China |
| SAMN10650776 | SRR8372431 | not_applicable | NA | China |
| SAMN10650777 | SRR8372570 | not_applicable | NA | China |
| SAMN10650778 | SRR8372569 | not_applicable | NA | China |
| SAMN10650779 | SRR8372568 | not_applicable | NA | China |
| SAMN10650780 | SRR8372573 | not_applicable | NA | China |
| SAMN10650781 | SRR8372572 | not_applicable | NA | China |
| SAMN10650782 | SRR8372577 | not_applicable | NA | China |
| SAMN10650783 | SRR8372576 | not_applicable | NA | China |
| SAMN10650784 | SRR8372574 | not_applicable | NA | China |
| SAMN10650785 | SRR8372578 | not_applicable | NA | China |
| SAMN10650786 | SRR8372588 | not_applicable | NA | China |
| SAMN10650787 | SRR8372333 | not_applicable | NA | China |
| SAMN10650788 | SRR8372395 | not_applicable | NA | China |
| SAMN10650789 | SRR8372635 | not_applicable | NA | China |
| SAMN10650790 | SRR8372281 | not_applicable | NA | China |
| SAMN10650791 | SRR8372282 | not_applicable | NA | China |
| SAMN10650792 | SRR8372279 | not_applicable | NA | China |
| SAMN10650793 | SRR8372280 | not_applicable | NA | China |
| SAMN10650794 | SRR8372277 | not_applicable | NA | China |
| SAMN10650795 | SRR8372278 | not_applicable | NA | China |
| SAMN10650796 | SRR8372275 | not_applicable | NA | China |
| SAMN10650797 | SRR8372390 | not_applicable | NA | China |
| SAMN10650798 | SRR8372389 | not_applicable | NA | China |
| SAMN10650799 | SRR8372392 | not_applicable | NA | China |
| SAMN10650800 | SRR8372391 | not_applicable | NA | China |
| SAMN10650801 | SRR8372385 | not_applicable | NA | China |
| SAMN10650802 | SRR8372410 | not_applicable | NA | China |
| SAMN10650803 | SRR8372409 | not_applicable | NA | China |
| SAMN10650804 | SRR8372412 | not_applicable | NA | China |
| SAMN10650805 | SRR8372411 | not_applicable | NA | China |
| SAMN10650806 | SRR8372587 | not_applicable | NA | China |
| SAMN10650807 | SRR8372414 | not_applicable | NA | China |
| SAMN10650808 | SRR8372413 | not_applicable | NA | China |
| SAMN10650809 | SRR8372416 | not_applicable | NA | China |
| SAMN10650810 | SRR8372415 | not_applicable | NA | China |

|              |            |                |    |       |
|--------------|------------|----------------|----|-------|
| SAMN10650811 | SRR8372408 | not_applicable | NA | China |
| SAMN10650812 | SRR8372407 | not_applicable | NA | China |
| SAMN10650813 | SRR8372383 | not_applicable | NA | China |
| SAMN10650814 | SRR8372384 | not_applicable | NA | China |
| SAMN10650815 | SRR8372381 | not_applicable | NA | China |
| SAMN10650816 | SRR8372382 | not_applicable | NA | China |
| SAMN10650817 | SRR8372526 | not_applicable | NA | China |
| SAMN10650818 | SRR8372480 | not_applicable | NA | China |
| SAMN10650819 | SRR8372586 | not_applicable | NA | China |
| SAMN10650820 | SRR8372276 | not_applicable | NA | China |
| SAMN10650821 | SRR8372479 | not_applicable | NA | China |
| SAMN10650822 | SRR8372478 | not_applicable | NA | China |
| SAMN10650823 | SRR8372501 | not_applicable | NA | China |
| SAMN10650824 | SRR8372502 | not_applicable | NA | China |
| SAMN10650825 | SRR8372585 | not_applicable | NA | China |
| SAMN10650826 | SRR8372584 | not_applicable | NA | China |
| SAMN10650827 | SRR1958815 | not_applicable | NA | China |
| SAMN10650828 | SRR1958811 | not_applicable | NA | China |
| SAMN10650829 | SRR8372598 | not_applicable | NA | China |
| SAMN10650830 | SRR8372597 | not_applicable | NA | China |
| SAMN10650831 | SRR7051060 | not_applicable | NA | China |
| SAMN10650832 | SRR7051059 | not_applicable | NA | China |
| SAMN10650834 | ERR2102111 | not_applicable | NA | China |
| SAMN10650835 | ERR2102112 | not_applicable | NA | China |
| SAMN10650836 | ERR2102113 | not_applicable | NA | China |
| SAMN10650837 | SRR8372503 | not_applicable | NA | China |
| SAMN10650838 | SRR8372504 | not_applicable | NA | China |
| SAMN10650839 | SRR8372484 | not_applicable | NA | China |
| SAMN10650840 | SRR8372505 | not_applicable | NA | China |
| SAMN10650841 | SRR8372506 | not_applicable | NA | China |
| SAMN10650842 | SRR8372507 | not_applicable | NA | China |
| SAMN10650843 | SRR8372483 | not_applicable | NA | China |
| SAMN10650844 | SRR8372482 | not_applicable | NA | China |
| SAMN10650845 | SRR8372508 | not_applicable | NA | China |
| SAMN10650846 | SRR8372481 | not_applicable | NA | China |
| SAMN10650847 | SRR8372424 | not_applicable | NA | China |
| SAMN10650848 | SRR8372425 | not_applicable | NA | China |
| SAMN10650849 | SRR8372426 | not_applicable | NA | China |
| SAMN10650850 | SRR8372427 | not_applicable | NA | China |
| SAMN10650851 | SRR8372421 | not_applicable | NA | China |
| SAMN10650852 | SRR8372422 | not_applicable | NA | China |
| SAMN10650853 | SRR8372492 | not_applicable | NA | China |
| SAMN10650854 | SRR8372493 | not_applicable | NA | China |

|              |            |                |    |       |
|--------------|------------|----------------|----|-------|
| SAMN10650855 | SRR8372583 | not_applicable | NA | China |
| SAMN10650856 | SRR8372494 | not_applicable | NA | China |
| SAMN10650857 | SRR8372342 | not_applicable | NA | China |
| SAMN10650858 | SRR8372343 | not_applicable | NA | China |
| SAMN10650859 | SRR8372336 | not_applicable | NA | China |
| SAMN10650860 | SRR8372337 | not_applicable | NA | China |
| SAMN10650861 | SRR8372332 | not_applicable | NA | China |
| SAMN10650862 | SRR8372335 | not_applicable | NA | China |
| SAMN10650863 | SRR8372334 | not_applicable | NA | China |
| SAMN10650864 | SRR8372329 | not_applicable | NA | China |
| SAMN10650865 | SRR8372328 | not_applicable | NA | China |
| SAMN10650866 | SRR8372331 | not_applicable | NA | China |
| SAMN10650867 | SRR8372273 | not_applicable | NA | China |
| SAMN10650868 | SRR8372274 | not_applicable | NA | China |
| SAMN10650869 | SRR8372291 | not_applicable | NA | China |
| SAMN10650870 | SRR8372292 | not_applicable | NA | China |
| SAMN10650871 | SRR8372289 | not_applicable | NA | China |
| SAMN10650872 | SRR8372290 | not_applicable | NA | China |
| SAMN10650873 | SRR8372283 | not_applicable | NA | China |
| SAMN10650874 | SRR8372284 | not_applicable | NA | China |
| SAMN10650875 | SRR8372293 | not_applicable | NA | China |
| SAMN10650876 | SRR8372287 | not_applicable | NA | China |
| SAMN10650877 | SRR8372538 | not_applicable | NA | China |
| SAMN10650878 | SRR8372537 | not_applicable | NA | China |
| SAMN10650879 | ERR2102146 | not_applicable | NA | China |
| SAMN10650880 | ERR2102147 | not_applicable | NA | China |
| SAMN10650881 | ERR2102149 | not_applicable | NA | China |
| SAMN10650882 | ERR2102150 | not_applicable | NA | China |
| SAMN10650883 | ERR2102151 | not_applicable | NA | China |
| SAMN10650884 | ERR2102154 | not_applicable | NA | China |
| SAMN10650885 | ERR2102156 | not_applicable | NA | China |
| SAMN10650886 | ERR2102157 | not_applicable | NA | China |
| SAMN10650889 | SRR8372499 | not_applicable | NA | China |
| SAMN10650890 | SRR8372500 | not_applicable | NA | China |
| SAMN10650891 | SRR8372477 | not_applicable | NA | China |
| SAMN10650892 | SRR8372536 | not_applicable | NA | China |
| SAMN10650893 | SRR8372535 | not_applicable | NA | China |
| SAMN10650894 | SRR8372534 | not_applicable | NA | China |
| SAMN10650895 | SRR8372533 | not_applicable | NA | China |
| SAMN10650896 | SRR8372532 | not_applicable | NA | China |
| SAMN10650897 | SRR8372388 | not_applicable | NA | China |
| SAMN10650898 | SRR8372386 | not_applicable | NA | China |
| SAMN10650899 | SRR8372423 | not_applicable | NA | China |

|              |            |                |    |       |
|--------------|------------|----------------|----|-------|
| SAMN10650900 | SRR8372420 | not_applicable | NA | China |
| SAMN10650901 | SRR8372419 | not_applicable | NA | China |
| SAMN10650902 | SRR8372418 | not_applicable | NA | China |
| SAMN10650903 | SRR8372432 | not_applicable | NA | China |
| SAMN10650904 | SRR8372582 | not_applicable | NA | China |
| SAMN10650905 | SRR8372581 | not_applicable | NA | China |
| SAMN10650906 | SRR8372580 | not_applicable | NA | China |
| SAMN10650907 | SRR8372579 | not_applicable | NA | China |
| SAMN10650908 | SRR8372540 | not_applicable | NA | China |
| SAMN10650909 | SRR8372539 | not_applicable | NA | China |
| SAMN10650910 | ERR2102114 | not_applicable | NA | China |
| SAMN10650911 | ERR2102148 | not_applicable | NA | China |
| SAMN10650912 | ERR2102152 | not_applicable | NA | China |
| SAMN10650913 | ERR2102153 | not_applicable | NA | China |
| SAMN10650914 | ERR2102155 | not_applicable | NA | China |
| SAMN10650917 | SRR8372387 | not_applicable | NA | China |
| SAMN10650918 | SRR8372377 | not_applicable | NA | China |
| SAMN10650919 | SRR8372447 | not_applicable | NA | China |
| SAMN10650920 | SRR8372448 | not_applicable | NA | China |
| SAMN10650921 | SRR8372449 | not_applicable | NA | China |
| SAMN10650922 | SRR8372450 | not_applicable | NA | China |
| SAMN10650923 | SRR8372417 | not_applicable | NA | China |
| SAMN10650924 | SRR8372445 | not_applicable | NA | China |
| SAMN10650926 | SRR8372446 | not_applicable | NA | China |
| SAMN10650927 | SRR8372359 | not_applicable | NA | China |
| SAMN10650928 | SRR8372375 | not_applicable | NA | China |
| SAMN10650929 | SRR8372376 | not_applicable | NA | China |
| SAMN10650930 | SRR8372378 | not_applicable | NA | China |
| SAMN10650931 | SRR8372330 | not_applicable | NA | China |
| SAMN10650932 | SRR8372341 | not_applicable | NA | China |
| SAMN10650933 | SRR8372358 | not_applicable | NA | China |
| SAMN10650935 | SRR8372362 | not_applicable | NA | China |
| SAMN10650936 | SRR8372361 | not_applicable | NA | China |
| SAMN10650937 | SRR8372495 | not_applicable | NA | China |
| SAMN10650938 | SRR8372488 | not_applicable | NA | China |
| SAMN10650939 | SRR8372489 | not_applicable | NA | China |
| SAMN10650940 | SRR8372491 | not_applicable | NA | China |
| SAMN10650941 | SRR8372496 | not_applicable | NA | China |
| SAMN10650942 | SRR8372497 | not_applicable | NA | China |
| SAMN10650943 | SRR8372529 | not_applicable | NA | China |
| SAMN10650944 | SRR8372524 | not_applicable | NA | China |
| SAMN10650945 | SRR8372523 | not_applicable | NA | China |
| SAMN10650946 | SRR8372520 | not_applicable | NA | China |

|              |            |                |    |       |
|--------------|------------|----------------|----|-------|
| SAMN10650947 | SRR8372590 | not_applicable | NA | China |
| SAMN10650948 | SRR8372589 | not_applicable | NA | China |
| SAMN10650949 | ERR2102116 | not_applicable | NA | China |
| SAMN10650950 | SRR8372592 | not_applicable | NA | China |
| SAMN10650951 | SRR8372591 | not_applicable | NA | China |
| SAMN10650952 | SRR8372594 | not_applicable | NA | China |
| SAMN10650955 | ERR2102158 | not_applicable | NA | China |
| SAMN10650956 | ERR2102117 | not_applicable | NA | China |
| SAMN10650957 | ERR2102118 | not_applicable | NA | China |
| SAMN10650958 | ERR2102119 | not_applicable | NA | China |
| SAMN10650959 | ERR2102120 | not_applicable | NA | China |
| SAMN10650960 | ERR2102121 | not_applicable | NA | China |
| SAMN10650961 | ERR2102122 | not_applicable | NA | China |
| SAMN10650962 | ERR2102123 | not_applicable | NA | China |
| SAMN10650963 | ERR2102124 | not_applicable | NA | China |
| SAMN10650964 | ERR2102125 | not_applicable | NA | China |
| SAMN10650965 | ERR2102126 | not_applicable | NA | China |
| SAMN10650966 | ERR2102127 | not_applicable | NA | China |
| SAMN10650969 | SRR8372379 | not_applicable | NA | China |
| SAMN10650970 | SRR8372380 | not_applicable | NA | China |
| SAMN10650971 | SRR8372373 | not_applicable | NA | China |
| SAMN10650972 | SRR8372374 | not_applicable | NA | China |
| SAMN10650973 | SRR8372364 | not_applicable | NA | China |
| SAMN10650974 | SRR8372363 | not_applicable | NA | China |
| SAMN10650975 | SRR8372366 | not_applicable | NA | China |
| SAMN10650976 | SRR8372365 | not_applicable | NA | China |
| SAMN10650977 | SRR8372368 | not_applicable | NA | China |
| SAMN10650978 | SRR8372451 | not_applicable | NA | China |
| SAMN10650979 | SRR8372452 | not_applicable | NA | China |
| SAMN10650980 | SRR8372468 | not_applicable | NA | China |
| SAMN10650981 | SRR8372467 | not_applicable | NA | China |
| SAMN10650982 | SRR8372464 | not_applicable | NA | China |
| SAMN10650983 | SRR8372463 | not_applicable | NA | China |
| SAMN10650984 | SRR8372462 | not_applicable | NA | China |
| SAMN10650985 | SRR8372461 | not_applicable | NA | China |
| SAMN10650986 | SRR8372367 | not_applicable | NA | China |
| SAMN10650990 | SRR8372547 | not_applicable | NA | China |
| SAMN10650992 | SRR8372549 | not_applicable | NA | China |
| SAMN10650997 | ERR2102159 | not_applicable | NA | China |
| SAMN10650998 | ERR2102160 | not_applicable | NA | China |
| SAMN10650999 | ERR2102161 | not_applicable | NA | China |
| SAMN10651000 | ERR2102162 | not_applicable | NA | China |
| SAMN10651001 | ERR2102128 | not_applicable | NA | China |

|              |                 |                |      |                |
|--------------|-----------------|----------------|------|----------------|
| SAMN10651002 | ERR2102129      | not_applicable | NA   | China          |
| SAMN10651003 | ERR2102130      | not_applicable | NA   | China          |
| SAMN10651004 | ERR2102131      | not_applicable | NA   | China          |
| SAMN10651005 | ERR2102163      | not_applicable | NA   | China          |
| SAMN10651006 | ERR2658136      | not_applicable | NA   | China          |
| SAMN10651007 | SRR8372519      | not_applicable | NA   | China          |
| SAMN10651008 | SRR8372528      | not_applicable | NA   | China          |
| SAMN10651009 | SRR8372527      | not_applicable | NA   | China          |
| SAMN10651010 | SRR8372530      | not_applicable | NA   | China          |
| SAMN10651011 | SRR8372512      | not_applicable | NA   | China          |
| SAMN10651012 | SRR8372511      | not_applicable | NA   | China          |
| SAMN10651013 | ERR2658137      | not_applicable | NA   | China          |
| SAMN10651014 | SRR8372510      | not_applicable | NA   | China          |
| SAMN10739864 | GCA_004794255.1 | Tohama_I       | NA   | United_Kingdom |
| SAMN10739865 | GCA_004794295.1 | Tohama_I       | NA   | Japan          |
| SAMN11295233 | GCA_008330005.1 | P2013109       | 2014 | China          |
| SAMN11539628 | SRR8652745      | NA             | 2018 | USA            |
| SAMN11539629 | SRR8652746      | NA             | 2018 | USA            |
| SAMN11539630 | SRR8652743      | NA             | 2018 | USA            |
| SAMN11539631 | SRR8652744      | NA             | 2018 | USA            |
| SAMN11539632 | SRR9002896      | NA             | 2018 | USA            |
| SAMN11539633 | SRR9002893      | NA             | 2018 | USA            |
| SAMN11539634 | SRR9002894      | NA             | 2018 | USA            |
| SAMN11539635 | SRR9002899      | NA             | 2018 | USA            |
| SAMN11539636 | SRR9002900      | NA             | 2018 | USA            |
| SAMN11539637 | SRR9002897      | NA             | 2018 | USA            |
| SAMN11539638 | SRR8661724      | NA             | 2018 | USA            |
| SAMN11539639 | SRR8661725      | NA             | 2018 | USA            |
| SAMN11539640 | SRR9002898      | NA             | 2018 | USA            |
| SAMN11539641 | SRR9002891      | NA             | 2018 | USA            |
| SAMN11539642 | SRR9002892      | NA             | 2018 | USA            |
| SAMN11539643 | SRR9002866      | NA             | 2018 | USA            |
| SAMN11539644 | SRR9002867      | NA             | 2018 | USA            |
| SAMN11539645 | SRR9002868      | NA             | 2018 | USA            |
| SAMN11539646 | SRR9002869      | NA             | 2018 | USA            |
| SAMN11539647 | SRR9002870      | NA             | 2018 | USA            |
| SAMN11539648 | SRR9002863      | NA             | 2018 | USA            |
| SAMN11539649 | SRR9002864      | NA             | 2018 | USA            |
| SAMN11539650 | SRR8661726      | NA             | 2018 | USA            |
| SAMN11539651 | SRR8661719      | NA             | 2018 | USA            |
| SAMN11539652 | SRR8661720      | NA             | 2018 | USA            |
| SAMN11539653 | SRR8661721      | NA             | 2018 | USA            |
| SAMN11539654 | SRR8661722      | NA             | 2018 | USA            |

|              |             |      |      |     |
|--------------|-------------|------|------|-----|
| SAMN11539656 | SRR8661730  | NA   | 2018 | USA |
| SAMN11539657 | SRR8661690  | NA   | 2018 | USA |
| SAMN11539659 | SRR8661692  | NA   | 2018 | USA |
| SAMN11539660 | SRR8661691  | NA   | 2018 | USA |
| SAMN11539661 | SRR8661694  | NA   | 2018 | USA |
| SAMN11539662 | SRR8661693  | NA   | 2018 | USA |
| SAMN11539663 | SRR8661696  | NA   | 2018 | USA |
| SAMN11539665 | SRR8661698  | NA   | 2018 | USA |
| SAMN11539666 | SRR8661697  | NA   | 2018 | USA |
| SAMN11539667 | SRR8661733  | NA   | 2018 | USA |
| SAMN11539668 | SRR8661734  | NA   | 2018 | USA |
| SAMN11539669 | SRR8661731  | NA   | 2018 | USA |
| SAMN11539670 | SRR8661732  | NA   | 2018 | USA |
| SAMN11539671 | SRR8661687  | NA   | 2018 | USA |
| SAMN11539672 | SRR8661688  | NA   | 2018 | USA |
| SAMN11539673 | SRR8661735  | NA   | 2018 | USA |
| SAMN11539675 | SRR8661727  | NA   | 2018 | USA |
| SAMN11539676 | SRR8661728  | K222 | 2018 | USA |
| SAMN11539677 | SRR8661706  | NA   | 2018 | USA |
| SAMN11539678 | SRR10806587 | NA   | 2018 | USA |
| SAMN11539679 | SRR8661704  | NA   | 2018 | USA |
| SAMN11539680 | SRR8661703  | NA   | 2018 | USA |
| SAMN11539681 | SRR8661702  | NA   | 2018 | USA |
| SAMN11539682 | SRR8661701  | NA   | 2018 | USA |
| SAMN11539683 | SRR8661700  | NA   | 2018 | USA |
| SAMN11539686 | SRR8661707  | K232 | 2018 | USA |
| SAMN11539687 | SRR8689258  | NA   | 2018 | USA |
| SAMN11539688 | SRR8652764  | NA   | 2018 | USA |
| SAMN11539690 | SRR9002865  | NA   | 2018 | USA |
| SAMN11539691 | SRR9002860  | K237 | 2018 | USA |
| SAMN11539692 | SRR9002861  | NA   | 2018 | USA |
| SAMN11539693 | SRR9002919  | NA   | 2018 | USA |
| SAMN11539694 | SRR9002862  | NA   | 2018 | USA |
| SAMN11539695 | SRR9002916  | NA   | 2018 | USA |
| SAMN11539696 | SRR9002915  | NA   | 2018 | USA |
| SAMN11539697 | SRR9002918  | NA   | 2018 | USA |
| SAMN11539698 | SRR9002917  | NA   | 2018 | USA |
| SAMN11539699 | SRR9002912  | NA   | 2018 | USA |
| SAMN11539700 | SRR8652766  | NA   | 2018 | USA |
| SAMN11539701 | SRR8652767  | NA   | 2018 | USA |
| SAMN11539702 | SRR8652760  | NA   | 2018 | USA |
| SAMN11539703 | SRR8652723  | NA   | 2018 | USA |
| SAMN11539704 | SRR8652724  | NA   | 2018 | USA |

|              |            |      |      |     |
|--------------|------------|------|------|-----|
| SAMN11539705 | SRR8652763 | NA   | 2018 | USA |
| SAMN11539706 | SRR8652771 | NA   | 2018 | USA |
| SAMN11539707 | SRR8652749 | NA   | 2018 | USA |
| SAMN11539708 | SRR8652750 | NA   | 2018 | USA |
| SAMN11539709 | SRR8652751 | NA   | 2018 | USA |
| SAMN11539710 | SRR9002911 | NA   | 2018 | USA |
| SAMN11539711 | SRR8996267 | NA   | 2018 | USA |
| SAMN11539712 | SRR8996266 | NA   | 2018 | USA |
| SAMN11539713 | SRR9002921 | NA   | 2018 | USA |
| SAMN11539714 | SRR9002922 | NA   | 2018 | USA |
| SAMN11539715 | SRR9002920 | NA   | 2018 | USA |
| SAMN11539716 | SRR8652791 | NA   | 2018 | USA |
| SAMN11539717 | SRR8652718 | NA   | 2018 | USA |
| SAMN11539718 | SRR8652720 | NA   | 2018 | USA |
| SAMN11539719 | SRR8652721 | NA   | 2018 | USA |
| SAMN11539720 | SRR8661709 | NA   | 2018 | USA |
| SAMN11539721 | SRR8661710 | NA   | 2018 | USA |
| SAMN11539722 | SRR8661711 | NA   | 2018 | USA |
| SAMN11539724 | SRR8661713 | NA   | 2018 | USA |
| SAMN11539725 | SRR8661714 | NA   | 2018 | USA |
| SAMN11539726 | SRR8661715 | NA   | 2018 | USA |
| SAMN11539727 | SRR8661716 | NA   | 2018 | USA |
| SAMN11539728 | SRR8661717 | NA   | 2018 | USA |
| SAMN11539731 | SRR8652752 | NA   | 2018 | USA |
| SAMN11539732 | SRR8661723 | NA   | 2018 | USA |
| SAMN11539733 | SRR8652753 | NA   | 2018 | USA |
| SAMN11539734 | SRR8652754 | NA   | 2018 | USA |
| SAMN11539735 | SRR8652781 | NA   | 2018 | USA |
| SAMN11539736 | SRR8652778 | NA   | 2018 | USA |
| SAMN11539737 | SRR8652777 | NA   | 2018 | USA |
| SAMN11539738 | SRR8652747 | NA   | 2018 | USA |
| SAMN11539739 | SRR8652748 | NA   | 2018 | USA |
| SAMN11821629 | SRR9123630 | A639 | 1993 | USA |
| SAMN11821630 | SRR9123629 | NA   | 1980 | USA |
| SAMN11821631 | SRR9123628 | D800 | 2002 | USA |
| SAMN11821632 | SRR9123627 | NA   | 2010 | USA |
| SAMN11821633 | SRR9123626 | NA   | 2008 | USA |
| SAMN11821634 | SRR9123620 | NA   | 2010 | USA |
| SAMN11821635 | SRR9123636 | NA   | 2010 | USA |
| SAMN11821636 | SRR9123602 | NA   | 2010 | USA |
| SAMN11821637 | SRR9123603 | NA   | 2010 | USA |
| SAMN11821638 | SRR9123568 | NA   | 2010 | USA |
| SAMN11821639 | SRR9123600 | NA   | 2010 | USA |



|              |            |    |      |     |
|--------------|------------|----|------|-----|
| SAMN11821640 | SRR9123562 | NA | 2010 | USA |
| SAMN11821641 | SRR9123566 | NA | 2010 | USA |
| SAMN11821642 | SRR9123606 | NA | 2010 | USA |
| SAMN11821643 | SRR9123564 | NA | 2010 | USA |
| SAMN11821644 | SRR9123560 | NA | 2010 | USA |
| SAMN11821645 | SRR9123571 | NA | 2010 | USA |
| SAMN11821646 | SRR9123607 | NA | 2010 | USA |
| SAMN11821647 | SRR9123604 | NA | 2010 | USA |
| SAMN11821648 | SRR9123698 | NA | 2010 | USA |
| SAMN11821649 | SRR9123702 | NA | 2010 | USA |
| SAMN11821650 | SRR9123700 | NA | 2010 | USA |
| SAMN11821651 | SRR9123704 | NA | 2010 | USA |
| SAMN11821652 | SRR9123703 | NA | 2010 | USA |
| SAMN11821653 | SRR9123706 | NA | 2010 | USA |
| SAMN11821654 | SRR9123705 | NA | 2011 | USA |
| SAMN11821655 | SRR9123676 | NA | 2011 | USA |
| SAMN11821656 | SRR9123677 | NA | 2011 | USA |
| SAMN11821657 | SRR9123674 | NA | 2011 | USA |
| SAMN11821658 | SRR9123605 | NA | 2011 | USA |
| SAMN11821659 | SRR9118337 | NA | 2011 | USA |
| SAMN11821660 | SRR9123608 | NA | 2011 | USA |
| SAMN11821661 | SRR9123609 | NA | 2011 | USA |
| SAMN11821662 | SRR9123623 | NA | 2011 | USA |
| SAMN11821663 | SRR9123622 | NA | 2011 | USA |
| SAMN11821664 | SRR9123625 | NA | 2011 | USA |
| SAMN11821665 | SRR9123624 | NA | 2011 | USA |
| SAMN11821666 | SRR9123640 | NA | 2011 | USA |
| SAMN11821667 | SRR9123567 | NA | 2011 | USA |
| SAMN11821668 | SRR9123675 | NA | 2011 | USA |
| SAMN11821669 | SRR9123672 | NA | 2010 | USA |
| SAMN11821670 | SRR9123673 | NA | 2011 | USA |
| SAMN11821671 | SRR9118280 | NA | 2011 | USA |
| SAMN11821672 | SRR9118281 | NA | 2011 | USA |
| SAMN11821673 | SRR9118282 | NA | 2012 | USA |
| SAMN11821674 | SRR9118283 | NA | 2012 | USA |
| SAMN11821675 | SRR9118300 | NA | 2012 | USA |
| SAMN11821676 | SRR9123670 | NA | 2012 | USA |
| SAMN11821678 | SRR9123668 | NA | 2012 | USA |
| SAMN11821679 | SRR9123669 | NA | 2012 | USA |
| SAMN11821680 | SRR9123699 | NA | 2012 | USA |
| SAMN11821681 | SRR9123716 | NA | 2012 | USA |
| SAMN11821682 | SRR9123715 | NA | 2012 | USA |
| SAMN11821683 | SRR9123718 | NA | 2012 | USA |

|              |            |    |      |     |
|--------------|------------|----|------|-----|
| SAMN11821684 | SRR9123717 | NA | 2012 | USA |
| SAMN11821685 | SRR9123720 | NA | 2012 | USA |
| SAMN11821686 | SRR9123719 | NA | 2012 | USA |
| SAMN11821687 | SRR9123722 | NA | 2012 | USA |
| SAMN11821688 | SRR9123565 | NA | 2012 | USA |
| SAMN11821689 | SRR9123601 | NA | 2012 | USA |
| SAMN11821690 | SRR9123551 | NA | 2012 | USA |
| SAMN11821691 | SRR9123550 | NA | 2012 | USA |
| SAMN11821692 | SRR9123549 | NA | 2012 | USA |
| SAMN11821693 | SRR9123548 | NA | 2012 | USA |
| SAMN11821694 | SRR9123547 | NA | 2012 | USA |
| SAMN11821695 | SRR9123546 | NA | 2011 | USA |
| SAMN11821696 | SRR9123545 | NA | 2011 | USA |
| SAMN11821697 | SRR9123544 | NA | 2011 | USA |
| SAMN11821698 | SRR9118299 | NA | 2011 | USA |
| SAMN11821699 | SRR9118302 | NA | 2011 | USA |
| SAMN11821700 | SRR9118301 | NA | 2012 | USA |
| SAMN11821701 | SRR9118296 | NA | 2012 | USA |
| SAMN11821702 | SRR9118295 | NA | 2012 | USA |
| SAMN11821704 | SRR9118297 | NA | 2012 | USA |
| SAMN11821705 | SRR9118303 | NA | 2012 | USA |
| SAMN11821706 | SRR9118287 | NA | 2012 | USA |
| SAMN11821707 | SRR9118286 | NA | 2012 | USA |
| SAMN11821708 | SRR9123639 | NA | 2012 | USA |
| SAMN11821709 | SRR9118289 | NA | 2012 | USA |
| SAMN11821710 | SRR9118288 | NA | 2012 | USA |
| SAMN11821711 | SRR9118291 | NA | 2012 | USA |
| SAMN11821712 | SRR9123721 | NA | 2012 | USA |
| SAMN11821713 | SRR9123638 | NA | 2012 | USA |
| SAMN11821714 | SRR9118290 | NA | 2012 | USA |
| SAMN11821715 | SRR9118293 | NA | 2012 | USA |
| SAMN11821716 | SRR9123637 | NA | 2012 | USA |
| SAMN11821717 | SRR9123559 | NA | 2012 | USA |
| SAMN11821718 | SRR9123644 | NA | 2012 | USA |
| SAMN11821719 | SRR9123643 | NA | 2012 | USA |
| SAMN11821720 | SRR9118338 | NA | 2012 | USA |
| SAMN11821721 | SRR9118335 | NA | 2012 | USA |
| SAMN11821722 | SRR9123708 | NA | 2012 | USA |
| SAMN11821723 | SRR9123642 | NA | 2012 | USA |
| SAMN11821724 | SRR9123641 | NA | 2012 | USA |
| SAMN11821725 | SRR9123646 | NA | 2012 | USA |
| SAMN11821726 | SRR9123558 | NA | 2012 | USA |
| SAMN11821727 | SRR9118292 | NA | 2012 | USA |

|              |            |      |      |     |
|--------------|------------|------|------|-----|
| SAMN11821728 | SRR9123707 | NA   | 2011 | USA |
| SAMN11821730 | SRR9123645 | NA   | 2012 | USA |
| SAMN11821731 | SRR9123614 | NA   | 2012 | USA |
| SAMN11821733 | SRR9123683 | NA   | 2012 | USA |
| SAMN11821734 | SRR9123667 | NA   | 2012 | USA |
| SAMN11821735 | SRR9123686 | NA   | 2012 | USA |
| SAMN11821736 | SRR9123687 | NA   | 2012 | USA |
| SAMN11821737 | SRR9123684 | NA   | 2012 | USA |
| SAMN11821738 | SRR9123685 | NA   | 2012 | USA |
| SAMN11821739 | SRR9123679 | NA   | 2012 | USA |
| SAMN11821740 | SRR9123680 | NA   | 2012 | USA |
| SAMN11821741 | SRR9123681 | NA   | 2012 | USA |
| SAMN11821742 | SRR9118285 | NA   | 2012 | USA |
| SAMN11821743 | SRR9118284 | NA   | 2012 | USA |
| SAMN11821744 | SRR9118266 | NA   | 2012 | USA |
| SAMN11821745 | SRR9118267 | NA   | 2012 | USA |
| SAMN11821746 | SRR9118264 | NA   | 2012 | USA |
| SAMN11821747 | SRR9118265 | NA   | 2012 | USA |
| SAMN11821748 | SRR9123584 | H970 | 2012 | USA |
| SAMN11821749 | SRR9123585 | NA   | 2012 | USA |
| SAMN11821750 | SRR9123586 | NA   | 2012 | USA |
| SAMN11821751 | SRR9123587 | NA   | 2012 | USA |
| SAMN11821752 | SRR9123580 | NA   | 2012 | USA |
| SAMN11821753 | SRR9123581 | NA   | 2012 | USA |
| SAMN11821754 | SRR9123582 | NA   | 2012 | USA |
| SAMN11821755 | SRR9123583 | NA   | 2012 | USA |
| SAMN11821756 | SRR9123588 | NA   | 2012 | USA |
| SAMN11821757 | SRR9123589 | NA   | 2012 | USA |
| SAMN11821758 | SRR9123615 | NA   | 2012 | USA |
| SAMN11821759 | SRR9123612 | NA   | 2012 | USA |
| SAMN11821760 | SRR9123613 | NA   | 2012 | USA |
| SAMN11821761 | SRR9123618 | NA   | 2012 | USA |
| SAMN11821762 | SRR9123619 | NA   | 2012 | USA |
| SAMN11821763 | SRR9123616 | NA   | 2012 | USA |
| SAMN11821764 | SRR9123617 | NA   | 2012 | USA |
| SAMN11821765 | SRR9123610 | NA   | 2012 | USA |
| SAMN11821766 | SRR9123611 | NA   | 2012 | USA |
| SAMN11821767 | SRR9123621 | NA   | 2012 | USA |
| SAMN11821768 | SRR9118270 | NA   | 2012 | USA |
| SAMN11821769 | SRR9118271 | NA   | 2012 | USA |
| SAMN11821770 | SRR9118268 | NA   | 2012 | USA |
| SAMN11821771 | SRR9118269 | NA   | 2012 | USA |
| SAMN11821772 | SRR9118262 | NA   | 2012 | USA |

|              |            |      |      |     |
|--------------|------------|------|------|-----|
| SAMN11821773 | SRR9118263 | NA   | 2012 | USA |
| SAMN11821774 | SRR9118272 | NA   | 2012 | USA |
| SAMN11821775 | SRR9118273 | NA   | 2012 | USA |
| SAMN11821776 | SRR9118305 | NA   | 2012 | USA |
| SAMN11821777 | SRR9118306 | NA   | 2012 | USA |
| SAMN11821778 | SRR9123553 | NA   | 2012 | USA |
| SAMN11821779 | SRR9123552 | NA   | 2012 | USA |
| SAMN11821780 | SRR9123555 | NA   | 2012 | USA |
| SAMN11821781 | SRR9123554 | NA   | 2012 | USA |
| SAMN11821782 | SRR9123557 | NA   | 2012 | USA |
| SAMN11821783 | SRR9123556 | NA   | 2012 | USA |
| SAMN11821784 | SRR9123598 | NA   | 2012 | USA |
| SAMN11821785 | SRR9123592 | I008 | 2012 | USA |
| SAMN11821786 | SRR9123590 | NA   | 2012 | USA |
| SAMN11821787 | SRR9118294 | NA   | 2012 | USA |
| SAMN11821788 | SRR9123662 | NA   | 2012 | USA |
| SAMN11821789 | SRR9123663 | NA   | 2012 | USA |
| SAMN11821790 | SRR9123664 | NA   | 2012 | USA |
| SAMN11821791 | SRR9123665 | NA   | 2012 | USA |
| SAMN11821792 | SRR9123666 | NA   | 2012 | USA |
| SAMN11821793 | SRR9123693 | NA   | 2012 | USA |
| SAMN11821794 | SRR9123692 | NA   | 2012 | USA |
| SAMN11821795 | SRR9123695 | NA   | 2012 | USA |
| SAMN11821796 | SRR9123694 | NA   | 2012 | USA |
| SAMN11821797 | SRR9123689 | NA   | 2012 | USA |
| SAMN11821798 | SRR9123682 | NA   | 2012 | USA |
| SAMN11821799 | SRR9123724 | NA   | 2012 | USA |
| SAMN11821800 | SRR9123725 | NA   | 2012 | USA |
| SAMN11821802 | SRR9123726 | NA   | 2012 | USA |
| SAMN11821806 | SRR9118256 | NA   | 2012 | USA |
| SAMN11821807 | SRR9118255 | NA   | 2012 | USA |
| SAMN11821808 | SRR9118254 | NA   | 2012 | USA |
| SAMN11821810 | SRR9118252 | NA   | 2012 | USA |
| SAMN11821811 | SRR9118261 | NA   | 2012 | USA |
| SAMN11821813 | SRR9118274 | NA   | 2012 | USA |
| SAMN11821814 | SRR9118275 | NA   | 2012 | USA |
| SAMN11821815 | SRR9118276 | NA   | 2012 | USA |
| SAMN11821816 | SRR9118277 | NA   | 2012 | USA |
| SAMN11821817 | SRR9118278 | NA   | 2012 | USA |
| SAMN11821818 | SRR9118304 | NA   | 2012 | USA |
| SAMN11821819 | SRR9118251 | NA   | 2012 | USA |
| SAMN11821820 | SRR9118329 | NA   | 2012 | USA |
| SAMN11821821 | SRR9118330 | NA   | 2012 | USA |

|              |            |    |      |     |
|--------------|------------|----|------|-----|
| SAMN11821822 | SRR9118327 | NA | 2012 | USA |
| SAMN11821823 | SRR9118328 | NA | 2012 | USA |
| SAMN11821824 | SRR9118325 | NA | 2012 | USA |
| SAMN11821825 | SRR9118326 | NA | 2012 | USA |
| SAMN11821826 | SRR9118323 | NA | 2012 | USA |
| SAMN11821827 | SRR9118324 | NA | 2012 | USA |
| SAMN11821828 | SRR9123688 | NA | 2012 | USA |
| SAMN11821829 | SRR9123691 | NA | 2012 | USA |
| SAMN11821830 | SRR9123690 | NA | 2012 | USA |
| SAMN11821831 | SRR9123697 | NA | 2012 | USA |
| SAMN11821832 | SRR9123696 | NA | 2012 | USA |
| SAMN11821833 | SRR9123712 | NA | 2012 | USA |
| SAMN11821834 | SRR9123713 | NA | 2012 | USA |
| SAMN11821835 | SRR9123714 | NA | 2012 | USA |
| SAMN11821836 | SRR9123709 | NA | 2012 | USA |
| SAMN11821837 | SRR9118321 | NA | 2012 | USA |
| SAMN11821838 | SRR9118322 | NA | 2012 | USA |
| SAMN11821839 | SRR9118361 | NA | 2012 | USA |
| SAMN11821840 | SRR9118360 | NA | 2012 | USA |
| SAMN11821841 | SRR9123710 | NA | 2012 | USA |
| SAMN11821842 | SRR9118359 | NA | 2012 | USA |
| SAMN11821843 | SRR9118358 | NA | 2012 | USA |
| SAMN11821844 | SRR9118365 | NA | 2012 | USA |
| SAMN11821845 | SRR9118364 | NA | 2012 | USA |
| SAMN11821846 | SRR9123651 | NA | 2012 | USA |
| SAMN11821847 | SRR9123652 | NA | 2012 | USA |
| SAMN11821848 | SRR9123649 | NA | 2012 | USA |
| SAMN11821849 | SRR9123650 | NA | 2012 | USA |
| SAMN11821850 | SRR9123655 | NA | 2012 | USA |
| SAMN11821851 | SRR9123656 | NA | 2012 | USA |
| SAMN11821852 | SRR9118336 | NA | 2012 | USA |
| SAMN11821853 | SRR9123654 | NA | 2012 | USA |
| SAMN11821854 | SRR9123647 | NA | 2012 | USA |
| SAMN11821855 | SRR9123648 | NA | 2012 | USA |
| SAMN11821856 | SRR9118279 | NA | 2012 | USA |
| SAMN11821857 | SRR9118363 | NA | 2012 | USA |
| SAMN11821858 | SRR9118362 | NA | 2012 | USA |
| SAMN11821859 | SRR9118357 | NA | 2012 | USA |
| SAMN11821860 | SRR9118356 | NA | 2012 | USA |
| SAMN11821861 | SRR9131313 | NA | 2012 | USA |
| SAMN11821862 | SRR9131314 | NA | 2012 | USA |
| SAMN11821863 | SRR9131311 | NA | 2012 | USA |
| SAMN11821864 | SRR9131312 | NA | 2012 | USA |

|              |            |    |      |     |
|--------------|------------|----|------|-----|
| SAMN11821865 | SRR9123519 | NA | 2012 | USA |
| SAMN11821867 | SRR9131317 | NA | 2012 | USA |
| SAMN11821868 | SRR9123659 | NA | 2012 | USA |
| SAMN11821869 | SRR9131404 | NA | 2012 | USA |
| SAMN11821870 | SRR9131403 | NA | 2012 | USA |
| SAMN11821871 | SRR9123520 | NA | 2012 | USA |
| SAMN11821872 | SRR9123521 | NA | 2012 | USA |
| SAMN11821873 | SRR9123522 | NA | 2012 | USA |
| SAMN11821874 | SRR9123523 | NA | 2012 | USA |
| SAMN11821875 | SRR9123524 | NA | 2012 | USA |
| SAMN11821876 | SRR9123525 | NA | 2012 | USA |
| SAMN11821877 | SRR9123526 | NA | 2012 | USA |
| SAMN11821878 | SRR9123514 | NA | 2012 | USA |
| SAMN11821879 | SRR9123515 | NA | 2012 | USA |
| SAMN11821880 | SRR9123499 | NA | 2012 | USA |
| SAMN11821881 | SRR9131318 | NA | 2012 | USA |
| SAMN11821882 | SRR9131315 | NA | 2012 | USA |
| SAMN11821883 | SRR9131316 | NA | 2012 | USA |
| SAMN11821884 | SRR9131309 | NA | 2012 | USA |
| SAMN11821885 | SRR9131310 | NA | 2012 | USA |
| SAMN11821886 | SRR9131341 | NA | 2012 | USA |
| SAMN11821887 | SRR9131340 | NA | 2012 | USA |
| SAMN11821888 | SRR9131343 | NA | 2012 | USA |
| SAMN11821890 | SRR9131342 | NA | 2012 | USA |
| SAMN11821891 | SRR9131345 | NA | 2012 | USA |
| SAMN11821892 | SRR9131344 | NA | 2012 | USA |
| SAMN11821893 | SRR9131347 | NA | 2012 | USA |
| SAMN11821894 | SRR9131346 | NA | 2012 | USA |
| SAMN11821895 | SRR9131339 | NA | 2012 | USA |
| SAMN11821896 | SRR9131338 | NA | 2012 | USA |
| SAMN11821897 | SRR9131367 | NA | 2012 | USA |
| SAMN11821898 | SRR9131365 | NA | 2012 | USA |
| SAMN11821899 | SRR9131366 | NA | 2012 | USA |
| SAMN11821900 | SRR9131352 | NA | 2012 | USA |
| SAMN11821901 | SRR9123660 | NA | 2012 | USA |
| SAMN11821902 | SRR9131353 | NA | 2012 | USA |
| SAMN11821903 | SRR9131350 | NA | 2012 | USA |
| SAMN11821904 | SRR9131351 | NA | 2012 | USA |
| SAMN11821905 | SRR9131356 | NA | 2012 | USA |
| SAMN11821906 | SRR9131408 | NA | 2012 | USA |
| SAMN11821907 | SRR9131371 | NA | 2012 | USA |
| SAMN11821909 | SRR9131373 | NA | 2012 | USA |
| SAMN11821910 | SRR9131374 | NA | 2012 | USA |

|              |            |    |      |     |
|--------------|------------|----|------|-----|
| SAMN11821913 | SRR9131370 | NA | 2012 | USA |
| SAMN11821914 | SRR9131416 | NA | 2012 | USA |
| SAMN11821915 | SRR9131357 | NA | 2012 | USA |
| SAMN11821917 | SRR9131414 | NA | 2012 | USA |
| SAMN11821919 | SRR9131420 | NA | 2012 | USA |
| SAMN11821920 | SRR9131419 | NA | 2012 | USA |
| SAMN11821921 | SRR9123498 | NA | 2012 | USA |
| SAMN11821922 | SRR9123501 | NA | 2012 | USA |
| SAMN11821923 | SRR9131472 | NA | 2012 | USA |
| SAMN11821924 | SRR9123500 | NA | 2012 | USA |
| SAMN11821925 | SRR9131473 | NA | 2012 | USA |
| SAMN11821926 | SRR9131474 | NA | 2012 | USA |
| SAMN11821927 | SRR9131447 | NA | 2012 | USA |
| SAMN11821928 | SRR9131448 | NA | 2012 | USA |
| SAMN11821929 | SRR9131445 | NA | 2012 | USA |
| SAMN11821930 | SRR9131446 | NA | 2012 | USA |
| SAMN11821931 | SRR9131443 | NA | 2012 | USA |
| SAMN11821932 | SRR9131444 | NA | 2012 | USA |
| SAMN11821933 | SRR9131441 | NA | 2012 | USA |
| SAMN11821934 | SRR9131442 | NA | 2012 | USA |
| SAMN11821935 | SRR9131449 | NA | 2012 | USA |
| SAMN11821936 | SRR9131450 | NA | 2012 | USA |
| SAMN11821937 | SRR9131481 | NA | 2012 | USA |
| SAMN11821938 | SRR9131418 | NA | 2012 | USA |
| SAMN11821939 | SRR9131480 | NA | 2012 | USA |
| SAMN11821940 | SRR9131417 | NA | 2012 | USA |
| SAMN11821941 | SRR9123495 | NA | 2012 | USA |
| SAMN11821942 | SRR9123661 | NA | 2012 | USA |
| SAMN11821943 | SRR9123657 | NA | 2012 | USA |
| SAMN11821944 | SRR9123494 | NA | 2012 | USA |
| SAMN11821945 | SRR9123658 | NA | 2012 | USA |
| SAMN11821946 | SRR9123635 | NA | 2012 | USA |
| SAMN11821947 | SRR9123634 | NA | 2012 | USA |
| SAMN11821948 | SRR9123633 | NA | 2012 | USA |
| SAMN11821949 | SRR9123632 | NA | 2012 | USA |
| SAMN11821950 | SRR9123631 | NA | 2012 | USA |
| SAMN11821951 | SRR9131483 | NA | 2012 | USA |
| SAMN11821952 | SRR9131482 | NA | 2012 | USA |
| SAMN11821953 | SRR9131477 | NA | 2012 | USA |
| SAMN11821954 | SRR9131476 | NA | 2012 | USA |
| SAMN11821955 | SRR9131479 | NA | 2012 | USA |
| SAMN11821956 | SRR9131478 | NA | 2012 | USA |
| SAMN11821957 | SRR9131485 | NA | 2012 | USA |

|              |            |      |      |     |
|--------------|------------|------|------|-----|
| SAMN11821958 | SRR9131484 | NA   | 2012 | USA |
| SAMN11821959 | SRR9131432 | NA   | 2012 | USA |
| SAMN11821960 | SRR9131431 | NA   | 2012 | USA |
| SAMN11821961 | SRR9131412 | I239 | 2012 | USA |
| SAMN11821962 | SRR9131411 | NA   | 2012 | USA |
| SAMN11821963 | SRR9131386 | NA   | 2012 | USA |
| SAMN11821964 | SRR9131385 | NA   | 2012 | USA |
| SAMN11821965 | SRR9131388 | NA   | 2012 | USA |
| SAMN11821966 | SRR9131387 | NA   | 2012 | USA |
| SAMN11821967 | SRR9131390 | NA   | 2012 | USA |
| SAMN11821968 | SRR9131389 | NA   | 2012 | USA |
| SAMN11821969 | SRR9131392 | NA   | 2012 | USA |
| SAMN11821970 | SRR9131391 | NA   | 2012 | USA |
| SAMN11821971 | SRR9131394 | NA   | 2012 | USA |
| SAMN11821972 | SRR9131393 | NA   | 2012 | USA |
| SAMN11821973 | SRR9131375 | NA   | 2012 | USA |
| SAMN11821974 | SRR9131379 | NA   | 2012 | USA |
| SAMN11821975 | SRR9131407 | NA   | 2012 | USA |
| SAMN11821976 | SRR9131410 | NA   | 2012 | USA |
| SAMN11821977 | SRR9131397 | NA   | 2012 | USA |
| SAMN11821978 | SRR9131401 | NA   | 2012 | USA |
| SAMN11821979 | SRR9131395 | NA   | 2012 | USA |
| SAMN11821980 | SRR9131396 | NA   | 2012 | USA |
| SAMN11821981 | SRR9123497 | NA   | 2012 | USA |
| SAMN11821982 | SRR9123496 | NA   | 2012 | USA |
| SAMN11821983 | SRR9123701 | NA   | 2012 | USA |
| SAMN11821984 | SRR9123516 | NA   | 2012 | USA |
| SAMN11821985 | SRR9123517 | NA   | 2012 | USA |
| SAMN11821986 | SRR9123533 | NA   | 2012 | USA |
| SAMN11821987 | SRR9123532 | NA   | 2012 | USA |
| SAMN11821988 | SRR9131354 | NA   | 2012 | USA |
| SAMN11821989 | SRR9131355 | NA   | 2012 | USA |
| SAMN11821990 | SRR9131360 | NA   | 2012 | USA |
| SAMN11821991 | SRR9131361 | NA   | 2012 | USA |
| SAMN11821992 | SRR9131363 | NA   | 2012 | USA |
| SAMN11821993 | SRR9131362 | NA   | 2012 | USA |
| SAMN11821994 | SRR9131331 | NA   | 2012 | USA |
| SAMN11821995 | SRR9131332 | NA   | 2012 | USA |
| SAMN11821999 | SRR9131427 | NA   | 2012 | USA |
| SAMN11822000 | SRR9131425 | NA   | 2012 | USA |
| SAMN11822001 | SRR9123531 | NA   | 2012 | USA |
| SAMN11822002 | SRR9123530 | NA   | 2012 | USA |
| SAMN11822003 | SRR9123529 | NA   | 2012 | USA |



|              |            |    |      |     |
|--------------|------------|----|------|-----|
| SAMN11822004 | SRR9123527 | NA | 2012 | USA |
| SAMN11822005 | SRR9123518 | NA | 2012 | USA |
| SAMN11822006 | SRR9123493 | NA | 2012 | USA |
| SAMN11822007 | SRR9123492 | NA | 2012 | USA |
| SAMN11822008 | SRR9131494 | NA | 2012 | USA |
| SAMN11822009 | SRR9131497 | NA | 2012 | USA |
| SAMN11822010 | SRR9131495 | NA | 2012 | USA |
| SAMN11822011 | SRR9131496 | NA | 2012 | USA |
| SAMN11822012 | SRR9131490 | NA | 2012 | USA |
| SAMN11822013 | SRR9131491 | NA | 2012 | USA |
| SAMN11822014 | SRR9131492 | NA | 2012 | USA |
| SAMN11822015 | SRR9131493 | NA | 2012 | USA |
| SAMN11822016 | SRR9131488 | NA | 2012 | USA |
| SAMN11822017 | SRR9131489 | NA | 2012 | USA |
| SAMN11822018 | SRR9123572 | NA | 2012 | USA |
| SAMN11822019 | SRR9123575 | NA | 2012 | USA |
| SAMN11822020 | SRR9123574 | NA | 2012 | USA |
| SAMN11822021 | SRR9131434 | NA | 2012 | USA |
| SAMN11822022 | SRR9131433 | NA | 2012 | USA |
| SAMN11822023 | SRR9131436 | NA | 2012 | USA |
| SAMN11822024 | SRR9131435 | NA | 2012 | USA |
| SAMN11822025 | SRR9131486 | NA | 2012 | USA |
| SAMN11822026 | SRR9131438 | NA | 2012 | USA |
| SAMN11822027 | SRR9131437 | NA | 2012 | USA |
| SAMN11822028 | SRR9131440 | NA | 2012 | USA |
| SAMN11822029 | SRR9131457 | NA | 2012 | USA |
| SAMN11822030 | SRR9131456 | NA | 2012 | USA |
| SAMN11822031 | SRR9131439 | NA | 2012 | USA |
| SAMN11822032 | SRR9131475 | NA | 2012 | USA |
| SAMN11822033 | SRR9131466 | NA | 2012 | USA |
| SAMN11822034 | SRR9131465 | NA | 2012 | USA |
| SAMN11822035 | SRR9131464 | NA | 2012 | USA |
| SAMN11822036 | SRR9131463 | NA | 2012 | USA |
| SAMN11822037 | SRR9131462 | NA | 2012 | USA |
| SAMN11822038 | SRR9131453 | NA | 2012 | USA |
| SAMN11822039 | SRR9123537 | NA | 2012 | USA |
| SAMN11822040 | SRR9123536 | NA | 2012 | USA |
| SAMN11822041 | SRR9131455 | NA | 2012 | USA |
| SAMN11822042 | SRR9131454 | NA | 2012 | USA |
| SAMN11822043 | SRR9131461 | NA | 2012 | USA |
| SAMN11822044 | SRR9131460 | NA | 2012 | USA |
| SAMN11822045 | SRR9131459 | NA | 2012 | USA |
| SAMN11822046 | SRR9131458 | NA | 2012 | USA |

|              |            |    |      |     |
|--------------|------------|----|------|-----|
| SAMN11822047 | SRR9131452 | NA | 2012 | USA |
| SAMN11822048 | SRR9131451 | NA | 2012 | USA |
| SAMN11822049 | SRR9131429 | NA | 2012 | USA |
| SAMN11822050 | SRR9131430 | NA | 2012 | USA |
| SAMN11822051 | SRR9123535 | NA | 2012 | USA |
| SAMN11822052 | SRR9123534 | NA | 2012 | USA |
| SAMN11822053 | SRR9123540 | NA | 2012 | USA |
| SAMN11822054 | SRR9123539 | NA | 2012 | USA |
| SAMN11822055 | SRR9123538 | NA | 2012 | USA |
| SAMN11822056 | SRR9123528 | NA | 2012 | USA |
| SAMN11822057 | SRR9123510 | NA | 2012 | USA |
| SAMN11822058 | SRR9123511 | NA | 2012 | USA |
| SAMN11822059 | SRR9123508 | NA | 2012 | USA |
| SAMN11822060 | SRR9123509 | NA | 2012 | USA |
| SAMN11822061 | SRR9123577 | NA | 2012 | USA |
| SAMN11822062 | SRR9123576 | NA | 2012 | USA |
| SAMN11822063 | SRR9123579 | NA | 2012 | USA |
| SAMN11822064 | SRR9123578 | NA | 2012 | USA |
| SAMN11822065 | SRR9123570 | NA | 2012 | USA |
| SAMN11822066 | SRR9123569 | NA | 2012 | USA |
| SAMN11822067 | SRR9123541 | NA | 2012 | USA |
| SAMN11822068 | SRR9123543 | NA | 2012 | USA |
| SAMN11822069 | SRR9123542 | NA | 2012 | USA |
| SAMN11822070 | SRR9123593 | NA | 2012 | USA |
| SAMN11822073 | SRR9123506 | NA | 2012 | USA |
| SAMN11822074 | SRR9123507 | NA | 2012 | USA |
| SAMN11822075 | SRR9123504 | NA | 2012 | USA |
| SAMN11822076 | SRR9123505 | NA | 2012 | USA |
| SAMN11822077 | SRR9123512 | NA | 2012 | USA |
| SAMN11822078 | SRR9123513 | NA | 2012 | USA |
| SAMN11822079 | SRR9123503 | NA | 2012 | USA |
| SAMN11822080 | SRR9123502 | NA | 2012 | USA |
| SAMN11822081 | SRR9123595 | NA | 2012 | USA |
| SAMN11822082 | SRR9123594 | NA | 2012 | USA |
| SAMN11822083 | SRR9123597 | NA | 2012 | USA |
| SAMN11822084 | SRR9123596 | NA | 2012 | USA |
| SAMN11822085 | SRR9123599 | NA | 2012 | USA |
| SAMN11822086 | SRR9123561 | NA | 2012 | USA |
| SAMN11822087 | SRR9997300 | NA | 2012 | USA |
| SAMN11822088 | SRR9123591 | NA | 2012 | USA |
| SAMN11822089 | SRR9131428 | NA | 2012 | USA |
| SAMN11822090 | SRR9131487 | NA | 2012 | USA |
| SAMN11822091 | SRR9131467 | NA | 2012 | USA |

|              |            |    |      |     |
|--------------|------------|----|------|-----|
| SAMN11822092 | SRR9131468 | NA | 2012 | USA |
| SAMN11822093 | SRR9131469 | NA | 2012 | USA |
| SAMN11822094 | SRR9131470 | NA | 2012 | USA |
| SAMN11822095 | SRR9131471 | NA | 2012 | USA |
| SAMN11822096 | SRR9006104 | NA | 2013 | USA |
| SAMN11822097 | SRR9006103 | NA | 2013 | USA |
| SAMN11822098 | SRR9006102 | NA | 2012 | USA |
| SAMN11822099 | SRR9006101 | NA | 2012 | USA |
| SAMN11822100 | SRR9006100 | NA | 2012 | USA |
| SAMN11822101 | SRR9006099 | NA | 2012 | USA |
| SAMN11822102 | SRR9006098 | NA | 2012 | USA |
| SAMN11822103 | SRR9006097 | NA | 2012 | USA |
| SAMN11822104 | SRR9006096 | NA | 2012 | USA |
| SAMN11822105 | SRR9006149 | NA | 2013 | USA |
| SAMN11822106 | SRR9118395 | NA | 2013 | USA |
| SAMN11822107 | SRR9118413 | NA | 2013 | USA |
| SAMN11822108 | SRR9118412 | NA | 2013 | USA |
| SAMN11822109 | SRR9118415 | NA | 2013 | USA |
| SAMN11822110 | SRR9118414 | NA | 2013 | USA |
| SAMN11822111 | SRR9118408 | NA | 2013 | USA |
| SAMN11822112 | SRR9118411 | NA | 2013 | USA |
| SAMN11822113 | SRR9118410 | NA | 2013 | USA |
| SAMN11822114 | SRR9118407 | NA | 2013 | USA |
| SAMN11822115 | SRR9118333 | NA | 2013 | USA |
| SAMN11822119 | SRR9118339 | NA | 2013 | USA |
| SAMN11822120 | SRR9118340 | NA | 2013 | USA |
| SAMN11822123 | SRR9118349 | NA | 2013 | USA |
| SAMN11822124 | SRR9118348 | NA | 2013 | USA |
| SAMN11822125 | SRR9118355 | NA | 2013 | USA |
| SAMN11822127 | SRR9118353 | NA | 2013 | USA |
| SAMN11822129 | SRR9118344 | NA | 2013 | USA |
| SAMN11822131 | SRR9118317 | NA | 2013 | USA |
| SAMN11822132 | SRR9118318 | NA | 2013 | USA |
| SAMN11822134 | SRR9118320 | NA | 2013 | USA |
| SAMN11822135 | SRR9006095 | NA | 2013 | USA |
| SAMN11822136 | SRR9006073 | NA | 2013 | USA |
| SAMN11822137 | SRR9006072 | NA | 2013 | USA |
| SAMN11822138 | SRR9006075 | NA | 2013 | USA |
| SAMN11822139 | SRR9006074 | NA | 2013 | USA |
| SAMN11822140 | SRR9006077 | NA | 2013 | USA |
| SAMN11822141 | SRR9006076 | NA | 2013 | USA |
| SAMN11822142 | SRR9006079 | NA | 2013 | USA |
| SAMN11822143 | SRR9006078 | NA | 2013 | USA |

|              |            |    |      |     |
|--------------|------------|----|------|-----|
| SAMN11822144 | SRR9006081 | NA | 2013 | USA |
| SAMN11822145 | SRR9006080 | NA | 2013 | USA |
| SAMN11822146 | SRR9006085 | NA | 2013 | USA |
| SAMN11822147 | SRR9006084 | NA | 2013 | USA |
| SAMN11822148 | SRR9006083 | NA | 2013 | USA |
| SAMN11822149 | SRR9006082 | NA | 2013 | USA |
| SAMN11822150 | SRR9006089 | NA | 2013 | USA |
| SAMN11822151 | SRR9006088 | NA | 2013 | USA |
| SAMN11822152 | SRR9006087 | NA | 2013 | USA |
| SAMN11822153 | SRR9006086 | NA | 2013 | USA |
| SAMN11822154 | SRR9006091 | NA | 2013 | USA |
| SAMN11822155 | SRR9118406 | NA | 2013 | USA |
| SAMN11822156 | SRR9118374 | NA | 2013 | USA |
| SAMN11822157 | SRR9118375 | NA | 2013 | USA |
| SAMN11822158 | SRR9118372 | NA | 2013 | USA |
| SAMN11822159 | SRR9118373 | NA | 2013 | USA |
| SAMN11822161 | SRR9118371 | NA | 2013 | USA |
| SAMN11822162 | SRR9118368 | NA | 2013 | USA |
| SAMN11822163 | SRR9118369 | NA | 2013 | USA |
| SAMN11822164 | SRR9118367 | NA | 2013 | USA |
| SAMN11822165 | SRR9118460 | NA | 2013 | USA |
| SAMN11822166 | SRR9118457 | NA | 2013 | USA |
| SAMN11822167 | SRR9118458 | NA | 2013 | USA |
| SAMN11822168 | SRR9118463 | NA | 2013 | USA |
| SAMN11822169 | SRR9118464 | NA | 2013 | USA |
| SAMN11822170 | SRR9118461 | NA | 2013 | USA |
| SAMN11822171 | SRR9118462 | NA | 2013 | USA |
| SAMN11822172 | SRR9118465 | NA | 2013 | USA |
| SAMN11822173 | SRR9118466 | NA | 2013 | USA |
| SAMN11822174 | SRR9118467 | NA | 2013 | USA |
| SAMN11822176 | SRR9118314 | NA | 2013 | USA |
| SAMN11822177 | SRR9118315 | NA | 2013 | USA |
| SAMN11822178 | SRR9118316 | NA | 2013 | USA |
| SAMN11822179 | SRR9118309 | NA | 2013 | USA |
| SAMN11822180 | SRR9118310 | NA | 2013 | USA |
| SAMN11822181 | SRR9118311 | NA | 2013 | USA |
| SAMN11822182 | SRR9006090 | NA | 2013 | USA |
| SAMN11822184 | SRR9118384 | NA | 2013 | USA |
| SAMN11822185 | SRR9118385 | NA | 2013 | USA |
| SAMN11822186 | SRR9118382 | NA | 2013 | USA |
| SAMN11822187 | SRR9118383 | NA | 2013 | USA |
| SAMN11822188 | SRR9118380 | NA | 2013 | USA |
| SAMN11822189 | SRR9118381 | NA | 2013 | USA |

|              |            |      |      |           |
|--------------|------------|------|------|-----------|
| SAMN11822190 | SRR9118378 | NA   | 2013 | USA       |
| SAMN11822191 | SRR9118379 | NA   | 2013 | USA       |
| SAMN11822192 | SRR9118376 | J064 | 2013 | USA       |
| SAMN11822193 | SRR9118377 | NA   | 2013 | USA       |
| SAMN11822194 | SRR9006051 | NA   | 2013 | USA       |
| SAMN11822195 | SRR9006052 | NA   | 2013 | USA       |
| SAMN11822196 | SRR9006053 | NA   | 2013 | USA       |
| SAMN11822197 | SRR9006054 | NA   | 2013 | USA       |
| SAMN11822198 | SRR9006047 | NA   | 2013 | USA       |
| SAMN11822199 | SRR9118431 | NA   | 2013 | USA       |
| SAMN11822200 | SRR9006048 | NA   | 2013 | USA       |
| SAMN11822201 | SRR9006049 | NA   | 2013 | USA       |
| SAMN11822202 | SRR9006050 | NA   | 2013 | USA       |
| SAMN11822203 | SRR9006056 | NA   | 2013 | USA       |
| SAMN11822204 | SRR9118430 | NA   | 2014 | USA       |
| SAMN11822205 | SRR9118433 | NA   | 2014 | USA       |
| SAMN11822206 | SRR9118432 | NA   | 2014 | USA       |
| SAMN11822207 | SRR9118427 | NA   | 2014 | USA       |
| SAMN11822208 | SRR9118429 | NA   | 2014 | USA       |
| SAMN11822209 | SRR9118428 | NA   | 2014 | USA       |
| SAMN11822210 | SRR9118435 | NA   | 2014 | USA       |
| SAMN11822211 | SRR9118434 | NA   | 2014 | USA       |
| SAMN11822212 | SRR9118477 | NA   | 2014 | USA       |
| SAMN11822213 | SRR9118423 | NA   | 2014 | USA       |
| SAMN11822214 | SRR9118422 | NA   | 2014 | USA       |
| SAMN11822215 | SRR9118425 | NA   | 2014 | USA       |
| SAMN11822216 | SRR9118424 | NA   | 2014 | USA       |
| SAMN11822217 | SRR9118419 | NA   | 2014 | USA       |
| SAMN11822218 | SRR9118480 | NA   | 2014 | USA       |
| SAMN11822219 | SRR9118479 | NA   | 2014 | Guatemala |
| SAMN11822220 | SRR9118486 | NA   | 2015 | USA       |
| SAMN11822221 | SRR9118307 | NA   | 2015 | USA       |
| SAMN11822222 | SRR9118308 | NA   | 2015 | USA       |
| SAMN11822223 | SRR9118342 | NA   | 2015 | USA       |
| SAMN11822229 | SRR9118404 | NA   | 2015 | USA       |
| SAMN11822230 | SRR9118426 | J385 | 2015 | USA       |
| SAMN11822231 | SRR9118392 | NA   | 2015 | USA       |
| SAMN11822232 | SRR9006057 | NA   | 2015 | USA       |
| SAMN11822233 | SRR9006106 | NA   | 2015 | USA       |
| SAMN11822234 | SRR9006107 | NA   | 2015 | USA       |
| SAMN11822235 | SRR9006108 | NA   | 2015 | USA       |
| SAMN11822236 | SRR9006109 | NA   | 2015 | USA       |
| SAMN11822238 | SRR9006136 | NA   | 2012 | USA       |

|              |            |      |      |     |
|--------------|------------|------|------|-----|
| SAMN11822241 | SRR9006129 | NA   | 2015 | USA |
| SAMN11822242 | SRR9118474 | NA   | 2015 | USA |
| SAMN11822243 | SRR9118473 | NA   | 2015 | USA |
| SAMN11822244 | SRR9118472 | NA   | 2015 | USA |
| SAMN11822245 | SRR9118471 | NA   | 2015 | USA |
| SAMN11822246 | SRR9118470 | NA   | 2015 | USA |
| SAMN11822247 | SRR9118468 | NA   | 2015 | USA |
| SAMN11822248 | SRR9118447 | NA   | 2015 | USA |
| SAMN11822249 | SRR9118449 | NA   | 2015 | USA |
| SAMN11822250 | SRR9118455 | NA   | 2016 | USA |
| SAMN11822251 | SRR9118487 | NA   | 2016 | USA |
| SAMN11822252 | SRR9006060 | NA   | 2016 | USA |
| SAMN11822253 | SRR9006061 | NA   | 2016 | USA |
| SAMN11822254 | SRR9006094 | NA   | 2016 | USA |
| SAMN11822255 | SRR9006059 | NA   | 2016 | USA |
| SAMN11822256 | SRR9006105 | NA   | 2016 | USA |
| SAMN11822257 | SRR9006065 | NA   | 2016 | USA |
| SAMN11822258 | SRR9006062 | NA   | 2016 | USA |
| SAMN11822259 | SRR9006063 | NA   | 2016 | USA |
| SAMN11822260 | SRR9006066 | NA   | 2016 | USA |
| SAMN11822261 | SRR9118439 | NA   | 2016 | USA |
| SAMN11822262 | SRR9118438 | NA   | 2016 | USA |
| SAMN11822264 | SRR9118389 | NA   | 2016 | USA |
| SAMN11822265 | SRR9118441 | NA   | 2016 | USA |
| SAMN11822266 | SRR9118440 | NA   | 2016 | USA |
| SAMN11822267 | SRR9006128 | NA   | 2016 | USA |
| SAMN11822268 | SRR9118386 | NA   | 2016 | USA |
| SAMN11822269 | SRR9118387 | NA   | 2016 | USA |
| SAMN11822270 | SRR9118443 | NA   | 2016 | USA |
| SAMN11822271 | SRR9118442 | NA   | 2016 | USA |
| SAMN11822272 | SRR9118445 | NA   | 2016 | USA |
| SAMN11822274 | SRR9118459 | NA   | 2016 | USA |
| SAMN11822275 | SRR9131636 | NA   | 2015 | USA |
| SAMN11822278 | SRR9131637 | J534 | 2015 | USA |
| SAMN11822279 | SRR9131676 | NA   | 2015 | USA |
| SAMN11822280 | SRR9131638 | NA   | 2015 | USA |
| SAMN11822281 | SRR9131594 | NA   | 2015 | USA |
| SAMN11822282 | SRR9131597 | NA   | 2015 | USA |
| SAMN11822283 | SRR9131600 | NA   | 2015 | USA |
| SAMN11822284 | SRR9131545 | NA   | 2015 | USA |
| SAMN11822285 | SRR9131546 | NA   | 2015 | USA |
| SAMN11822286 | SRR9131601 | NA   | 2015 | USA |
| SAMN11822287 | SRR9131543 | NA   | 2015 | USA |

|              |            |    |      |     |
|--------------|------------|----|------|-----|
| SAMN11822288 | SRR9131602 | NA | 2016 | USA |
| SAMN11822289 | SRR9131603 | NA | 2016 | USA |
| SAMN11822290 | SRR9131275 | NA | 2016 | USA |
| SAMN11822291 | SRR9131274 | NA | 2016 | USA |
| SAMN11822292 | SRR9131277 | NA | 2016 | USA |
| SAMN11822293 | SRR9131276 | NA | 2016 | USA |
| SAMN11822294 | SRR9131267 | NA | 2016 | USA |
| SAMN11822295 | SRR9131279 | NA | 2016 | USA |
| SAMN11822296 | SRR9131290 | NA | 2016 | USA |
| SAMN11822297 | SRR9131305 | NA | 2016 | USA |
| SAMN11822298 | SRR9131278 | NA | 2016 | USA |
| SAMN11822299 | SRR9131263 | NA | 2016 | USA |
| SAMN11822300 | SRR9131697 | NA | 2016 | USA |
| SAMN11822301 | SRR9131688 | NA | 2016 | USA |
| SAMN11822302 | SRR9131687 | NA | 2016 | USA |
| SAMN11822303 | SRR9131686 | NA | 2016 | USA |
| SAMN11822304 | SRR9131675 | NA | 2016 | USA |
| SAMN11822305 | SRR9131705 | NA | 2016 | USA |
| SAMN11822306 | SRR9131704 | NA | 2016 | USA |
| SAMN11822307 | SRR9131671 | NA | 2016 | USA |
| SAMN11822308 | SRR9131672 | NA | 2016 | USA |
| SAMN11822309 | SRR9131692 | NA | 2016 | USA |
| SAMN11822310 | SRR9131544 | NA | 2016 | USA |
| SAMN11822311 | SRR9131541 | NA | 2016 | USA |
| SAMN11822312 | SRR9131542 | NA | 2016 | USA |
| SAMN11822313 | SRR9131539 | NA | 2016 | USA |
| SAMN11822314 | SRR9131604 | NA | 2016 | USA |
| SAMN11822315 | SRR9131605 | NA | 2016 | USA |
| SAMN11822316 | SRR9131264 | NA | 2016 | USA |
| SAMN11822317 | SRR9131606 | NA | 2016 | USA |
| SAMN11822318 | SRR9131540 | NA | 2016 | USA |
| SAMN11822319 | SRR9131571 | NA | 2016 | USA |
| SAMN11822320 | SRR9131570 | NA | 2016 | USA |
| SAMN11822321 | SRR9131573 | NA | 2016 | USA |
| SAMN11822322 | SRR9131572 | NA | 2016 | USA |
| SAMN11822323 | SRR9131575 | NA | 2016 | USA |
| SAMN11822324 | SRR9131576 | NA | 2016 | USA |
| SAMN11822325 | SRR9131578 | NA | 2016 | USA |
| SAMN11822326 | SRR9131286 | NA | 2016 | USA |
| SAMN11822327 | SRR9131690 | NA | 2016 | USA |
| SAMN11822328 | SRR9131689 | NA | 2016 | USA |
| SAMN11822329 | SRR9131281 | NA | 2016 | USA |
| SAMN11822330 | SRR9131695 | NA | 2016 | USA |

|              |            |    |      |     |
|--------------|------------|----|------|-----|
| SAMN11822331 | SRR9131599 | NA | 2016 | USA |
| SAMN11822332 | SRR9131694 | NA | 2016 | USA |
| SAMN11822333 | SRR9131280 | NA | 2016 | USA |
| SAMN11822334 | SRR9131564 | NA | 2016 | USA |
| SAMN11822335 | SRR9131292 | NA | 2016 | USA |
| SAMN11822336 | SRR9131306 | NA | 2016 | USA |
| SAMN11822337 | SRR9131619 | NA | 2016 | USA |
| SAMN11822338 | SRR9131716 | NA | 2016 | USA |
| SAMN11822340 | SRR9131698 | NA | 2016 | USA |
| SAMN11822341 | SRR9131709 | NA | 2016 | USA |
| SAMN11822342 | SRR9131382 | NA | 2016 | USA |
| SAMN11822344 | SRR9131384 | NA | 2016 | USA |
| SAMN11822348 | SRR9131380 | NA | 2016 | USA |
| SAMN11822349 | SRR9131718 | NA | 2016 | USA |
| SAMN11822351 | SRR9131724 | NA | 2016 | USA |
| SAMN11822352 | SRR9131708 | NA | 2016 | USA |
| SAMN11822353 | SRR9131710 | NA | 2016 | USA |
| SAMN11822354 | SRR9131707 | NA | 2016 | USA |
| SAMN11822355 | SRR9131706 | NA | 2016 | USA |
| SAMN11822356 | SRR9131665 | NA | 2016 | USA |
| SAMN11822357 | SRR9131664 | NA | 2016 | USA |
| SAMN11822358 | SRR9131663 | NA | 2016 | USA |
| SAMN11822359 | SRR9131662 | NA | 2016 | USA |
| SAMN11822360 | SRR9131723 | NA | 2016 | USA |
| SAMN11822361 | SRR9131726 | NA | 2016 | USA |
| SAMN11822362 | SRR9131725 | NA | 2016 | USA |
| SAMN11822363 | SRR9131720 | NA | 2016 | USA |
| SAMN11822364 | SRR9131719 | NA | 2016 | USA |
| SAMN11822365 | SRR9131717 | NA | 2016 | USA |
| SAMN11822366 | SRR9131713 | NA | 2016 | USA |
| SAMN11822367 | SRR9131712 | NA | 2016 | USA |
| SAMN11822368 | SRR9131715 | NA | 2016 | USA |
| SAMN11822369 | SRR9131565 | NA | 2016 | USA |
| SAMN11822370 | SRR9131714 | NA | 2016 | USA |
| SAMN11822371 | SRR9131661 | NA | 2016 | USA |
| SAMN11822372 | SRR9131660 | NA | 2016 | USA |
| SAMN11822373 | SRR9131618 | NA | 2016 | USA |
| SAMN11822374 | SRR9131617 | NA | 2016 | USA |
| SAMN11822375 | SRR9131620 | NA | 2016 | USA |
| SAMN11822376 | SRR9131592 | NA | 2016 | USA |
| SAMN11822377 | SRR9131402 | NA | 2016 | USA |
| SAMN11822378 | SRR9131398 | NA | 2016 | USA |
| SAMN11822379 | SRR9131400 | NA | 2016 | USA |



|              |            |      |      |     |
|--------------|------------|------|------|-----|
| SAMN11822381 | SRR9131711 | NA   | 2017 | USA |
| SAMN11822382 | SRR9131307 | NA   | 2017 | USA |
| SAMN11822384 | SRR9131321 | NA   | 2017 | USA |
| SAMN11822385 | SRR9131319 | NA   | 2017 | USA |
| SAMN11822386 | SRR9131308 | NA   | 2017 | USA |
| SAMN11822387 | SRR9131659 | NA   | 2017 | USA |
| SAMN11822388 | SRR9131658 | NA   | 2017 | USA |
| SAMN11822389 | SRR9131667 | NA   | 2017 | USA |
| SAMN11822390 | SRR9131666 | NA   | 2017 | USA |
| SAMN11822391 | SRR9131703 | NA   | 2016 | USA |
| SAMN11822392 | SRR9131702 | J733 | 2017 | USA |
| SAMN11822393 | SRR9131700 | J737 | 2017 | USA |
| SAMN11822394 | SRR9131685 | J739 | 2017 | USA |
| SAMN11822395 | SRR9131320 | J740 | 2017 | USA |
| SAMN11822396 | SRR9131326 | J741 | 2017 | USA |
| SAMN11822397 | SRR9131348 | J742 | 2017 | USA |
| SAMN11822398 | SRR9131325 | NA   | 2017 | USA |
| SAMN11822399 | SRR9131566 | NA   | 2017 | USA |
| SAMN11822400 | SRR9131562 | NA   | 2017 | USA |
| SAMN11822401 | SRR9131582 | NA   | 2017 | USA |
| SAMN11822402 | SRR9131553 | NA   | 2017 | USA |
| SAMN11822403 | SRR9131643 | NA   | 2017 | USA |
| SAMN11822404 | SRR9131644 | J767 | 2017 | USA |
| SAMN11822405 | SRR9131647 | NA   | 2017 | USA |
| SAMN11822406 | SRR9131646 | NA   | 2017 | USA |
| SAMN11822407 | SRR9131608 | NA   | 2017 | USA |
| SAMN11822408 | SRR9131677 | NA   | 2017 | USA |
| SAMN11822409 | SRR9131678 | NA   | 2017 | USA |
| SAMN11822410 | SRR9131679 | NA   | 2017 | USA |
| SAMN11822411 | SRR9131680 | NA   | 2017 | USA |
| SAMN11822412 | SRR9131681 | NA   | 2017 | USA |
| SAMN11822413 | SRR9131682 | NA   | 2017 | USA |
| SAMN11822414 | SRR9131297 | NA   | 2017 | USA |
| SAMN11822415 | SRR9131304 | NA   | 2017 | USA |
| SAMN11822416 | SRR9131303 | NA   | 2017 | USA |
| SAMN11822417 | SRR9131266 | NA   | 2017 | USA |
| SAMN11822418 | SRR9131295 | NA   | 2017 | USA |
| SAMN11822419 | SRR9131296 | NA   | 2017 | USA |
| SAMN11822420 | SRR9131293 | NA   | 2017 | USA |
| SAMN11822421 | SRR9131336 | NA   | 2017 | USA |
| SAMN11822422 | SRR9131364 | NA   | 2017 | USA |
| SAMN11822423 | SRR9131674 | NA   | 2017 | USA |
| SAMN11822424 | SRR9131656 | NA   | 2017 | USA |

|              |            |            |      |     |
|--------------|------------|------------|------|-----|
| SAMN11822425 | SRR9131657 | NA         | 2017 | USA |
| SAMN11822426 | SRR9131294 | NA         | 2017 | USA |
| SAMN11822427 | SRR9131652 | J818       | 2017 | USA |
| SAMN11822428 | SRR9131668 | J820       | 2017 | USA |
| SAMN11822429 | SRR9131299 | NA         | 2017 | USA |
| SAMN11822430 | SRR9131300 | NA         | 2017 | USA |
| SAMN11822431 | SRR9131291 | NA         | 2017 | USA |
| SAMN11822432 | SRR9131298 | NA         | 2017 | USA |
| SAMN11822433 | SRR9131302 | NA         | 2017 | USA |
| SAMN11822434 | SRR9131269 | NA         | 2017 | USA |
| SAMN11822435 | SRR9131349 | NA         | 2017 | USA |
| SAMN11822437 | SRR9131271 | NA         | 2017 | USA |
| SAMN11822438 | SRR9131270 | NA         | 2017 | USA |
| SAMN11822439 | SRR9131273 | NA         | 2017 | USA |
| SAMN11822440 | SRR9131272 | NA         | 2017 | USA |
| SAMN11883804 | SRR9131536 | ATCC_12742 | NA   | NA  |
| SAMN12108480 | SRR9131581 | NA         | 2017 | USA |
| SAMN12108485 | SRR9131558 | NA         | 2018 | USA |
| SAMN12108486 | SRR9131584 | NA         | 2018 | USA |
| SAMN12108487 | SRR9131585 | NA         | 2018 | USA |
| SAMN12108489 | SRR9131586 | NA         | 2018 | USA |
| SAMN12108490 | SRR9131634 | NA         | 2018 | USA |
| SAMN12108491 | SRR9131633 | NA         | 2018 | USA |
| SAMN12108493 | SRR9131632 | NA         | 2018 | USA |
| SAMN12108494 | SRR9131509 | NA         | 2018 | USA |
| SAMN12108495 | SRR9131510 | NA         | 2018 | USA |
| SAMN12108496 | SRR9131507 | NA         | 2017 | USA |
| SAMN12108497 | SRR9131508 | NA         | 2018 | USA |
| SAMN12108498 | SRR9131513 | NA         | 2018 | USA |
| SAMN12108499 | SRR9131514 | NA         | 2018 | USA |
| SAMN12108500 | SRR9131511 | NA         | 2018 | USA |
| SAMN12108501 | SRR9131512 | NA         | 2017 | USA |
| SAMN12108502 | SRR9131516 | NA         | 2018 | USA |
| SAMN12108503 | SRR9131517 | NA         | 2017 | USA |
| SAMN12108504 | SRR9131631 | NA         | 2018 | USA |
| SAMN12108505 | SRR9131630 | NA         | 2018 | USA |
| SAMN12108506 | SRR9131629 | NA         | 2018 | USA |
| SAMN12108507 | SRR9131628 | NA         | 2018 | USA |
| SAMN12108508 | SRR9131627 | NA         | 2018 | USA |
| SAMN12108509 | SRR9131626 | NA         | 2017 | USA |
| SAMN12108510 | SRR9131625 | NA         | 2018 | USA |
| SAMN12108511 | SRR9131624 | NA         | 2018 | USA |
| SAMN12108513 | SRR9131648 | NA         | 2018 | USA |

|              |            |    |      |     |
|--------------|------------|----|------|-----|
| SAMN12108514 | SRR9151824 | NA | 2018 | USA |
| SAMN12108515 | SRR9131523 | NA | 2018 | USA |
| SAMN12108516 | SRR9131524 | NA | 2018 | USA |
| SAMN12108517 | SRR9589909 | NA | 2018 | USA |
| SAMN12108522 | SRR9131649 | NA | 2018 | USA |
| SAMN12108523 | SRR9131593 | NA | 2018 | USA |
| SAMN12108524 | SRR9589903 | NA | 2018 | USA |
| SAMN12108525 | SRR9589904 | NA | 2018 | USA |
| SAMN12108526 | SRR9589902 | NA | 2018 | USA |
| SAMN12108527 | SRR9589898 | NA | 2018 | USA |
| SAMN12108528 | SRR9589897 | NA | 2018 | USA |
| SAMN12108529 | SRR9589896 | NA | 2018 | USA |
| SAMN12108530 | SRR9589895 | NA | 2018 | USA |
| SAMN12108531 | SRR9589894 | NA | 2018 | USA |
| SAMN12108532 | SRR9589893 | NA | 2018 | USA |
| SAMN12108533 | SRR9589892 | NA | 2018 | USA |
| SAMN12108534 | SRR9589891 | NA | 2018 | USA |
| SAMN12108535 | SRR9589890 | NA | 2018 | USA |
| SAMN12108536 | SRR9589889 | NA | 2018 | USA |
| SAMN12108537 | SRR9589900 | NA | 2018 | USA |
| SAMN12108538 | SRR9589905 | NA | 2018 | USA |
| SAMN12108539 | SRR9589911 | NA | 2018 | USA |
| SAMN12108540 | SRR9589888 | NA | 2018 | USA |
| SAMN12108541 | SRR9589899 | NA | 2018 | USA |
| SAMN12108542 | SRR9589912 | NA | 2018 | USA |
| SAMN12108543 | SRR9589901 | NA | 2018 | USA |
| SAMN12108544 | SRR9131548 | NA | 2018 | USA |
| SAMN12108545 | SRR9131547 | NA | 2018 | USA |
| SAMN12108546 | SRR9131588 | NA | 2017 | USA |
| SAMN12108547 | SRR9131557 | NA | 2017 | USA |
| SAMN12108548 | SRR9131555 | NA | 2018 | USA |
| SAMN12108549 | SRR9131591 | NA | 2018 | USA |
| SAMN12108550 | SRR9131596 | NA | 2017 | USA |
| SAMN12108551 | SRR9131554 | NA | 2018 | USA |
| SAMN12108552 | SRR9131556 | NA | 2016 | USA |
| SAMN12108553 | SRR9131533 | NA | 2017 | USA |
| SAMN12108554 | SRR9131595 | NA | 2017 | USA |
| SAMN12108555 | SRR9131610 | NA | 2017 | USA |
| SAMN12108556 | SRR9131611 | NA | 2017 | USA |
| SAMN12108557 | SRR9131531 | NA | 2017 | USA |
| SAMN12108558 | SRR9131568 | NA | 2017 | USA |
| SAMN12305674 | SRR9131532 | NA | 2017 | USA |
| SAMN12305675 | SRR9131535 | NA | 2017 | USA |

|              |             |    |      |     |
|--------------|-------------|----|------|-----|
| SAMN12305676 | SRR9131534  | NA | 2017 | USA |
| SAMN12305677 | SRR9131538  | NA | 2017 | USA |
| SAMN12305678 | SRR9131537  | NA | 2017 | USA |
| SAMN12305679 | SRR9131567  | NA | 2017 | USA |
| SAMN12305680 | SRR9131589  | NA | 2017 | USA |
| SAMN12305681 | SRR9131587  | NA | 2017 | USA |
| SAMN12305682 | SRR9589876  | NA | 2017 | USA |
| SAMN12305683 | SRR9589875  | NA | 2017 | USA |
| SAMN12305684 | SRR9589878  | NA | 2017 | USA |
| SAMN12305685 | SRR9589877  | NA | 2017 | USA |
| SAMN12305686 | SRR9589880  | NA | 2017 | USA |
| SAMN12305687 | SRR9589879  | NA | 2018 | USA |
| SAMN12305688 | SRR9589882  | NA | 2018 | USA |
| SAMN12305689 | SRR9589881  | NA | 2018 | USA |
| SAMN12305690 | SRR9589873  | NA | 2018 | USA |
| SAMN12305691 | SRR9589872  | NA | 2018 | USA |
| SAMN12305693 | SRR9589844  | NA | 2018 | USA |
| SAMN12305694 | SRR9589841  | NA | 2018 | USA |
| SAMN12305695 | SRR9589842  | NA | 2018 | USA |
| SAMN12305696 | SRR9589847  | NA | 2018 | USA |
| SAMN12305697 | SRR9589848  | NA | 2017 | USA |
| SAMN12305698 | SRR9589845  | NA | 2017 | USA |
| SAMN12305699 | SRR9589846  | NA | 2017 | USA |
| SAMN12305700 | SRR9589839  | NA | 2016 | USA |
| SAMN12305701 | SRR9589840  | NA | 2017 | USA |
| SAMN12305702 | SRR9589886  | NA | 2019 | USA |
| SAMN12305703 | SRR9589885  | NA | 2019 | USA |
| SAMN12305704 | SRR9589884  | NA | 2019 | USA |
| SAMN12305705 | SRR9589883  | NA | 2019 | USA |
| SAMN12305706 | SRR9589867  | NA | 2019 | USA |
| SAMN12305707 | SRR9589887  | NA | 2019 | USA |
| SAMN12305708 | SRR9589866  | NA | 2019 | USA |
| SAMN12305709 | SRR9589865  | NA | 2019 | USA |
| SAMN12305710 | SRR9718415  | NA | 2019 | USA |
| SAMN12305711 | SRR9131590  | NA | 2019 | USA |
| SAMN12305712 | SRR9718416  | NA | 2019 | USA |
| SAMN12305713 | SRR9718413  | NA | 2019 | USA |
| SAMN12305714 | SRR9589869  | NA | 2019 | USA |
| SAMN12305715 | SRR9718414  | NA | 2019 | USA |
| SAMN12305716 | SRR9718412  | NA | 2019 | USA |
| SAMN12305717 | SRR9589868  | NA | 2019 | USA |
| SAMN12305719 | SRR10806583 | NA | 2019 | USA |
| SAMN12305720 | SRR9718407  | NA | 2019 | USA |

|              |             |      |      |             |
|--------------|-------------|------|------|-------------|
| SAMN12305721 | SRR9718408  | NA   | 2019 | USA         |
| SAMN12305723 | SRR9151823  | NA   | 2019 | USA         |
| SAMN12305724 | SRR9131529  | NA   | 2019 | USA         |
| SAMN12305725 | SRR9131528  | NA   | 2019 | USA         |
| SAMN12305726 | SRR9131530  | NA   | 2019 | USA         |
| SAMN12305727 | SRR9131520  | NA   | 2019 | USA         |
| SAMN12305728 | SRR9131525  | NA   | 2019 | USA         |
| SAMN12305729 | SRR9131518  | NA   | 2019 | USA         |
| SAMN12305730 | SRR10806582 | NA   | 2019 | USA         |
| SAMN12305731 | SRR9131519  | NA   | 2019 | USA         |
| SAMN12305732 | SRR9131521  | NA   | 2019 | USA         |
| SAMN12305733 | SRR9131522  | NA   | 2019 | USA         |
| SAMN12305734 | SRR9131500  | NA   | 2019 | USA         |
| SAMN12305735 | SRR9131499  | NA   | 2019 | USA         |
| SAMN12305736 | SRR9131502  | NA   | 2019 | USA         |
| SAMN12305737 | SRR9131501  | NA   | 2019 | USA         |
| SAMN12305738 | SRR9131504  | NA   | 2019 | USA         |
| SAMN12305739 | SRR9131503  | NA   | 2019 | USA         |
| SAMN12305740 | SRR10247394 | NA   | 2019 | USA         |
| SAMN12305742 | SRR9131498  | NA   | 2019 | USA         |
| SAMN12305743 | SRR9131515  | NA   | 2019 | USA         |
| SAMN12385760 | SRR9718386  | NZ1  | 1982 | New_Zealand |
| SAMN12385761 | SRR11455743 | NZ2  | 1983 | New_Zealand |
| SAMN12385762 | SRR11455742 | NZ3  | 1984 | New_Zealand |
| SAMN12385763 | SRR9589852  | NZ4  | 1985 | New_Zealand |
| SAMN12385764 | SRR9589859  | NZ5  | 1986 | New_Zealand |
| SAMN12385765 | SRR9589861  | NZ6  | 1987 | New_Zealand |
| SAMN12385766 | SRR11455702 | NZ7  | 1988 | New_Zealand |
| SAMN12385767 | SRR11455701 | NZ8  | 1989 | New_Zealand |
| SAMN12385768 | SRR11455700 | NZ9  | 1990 | New_Zealand |
| SAMN12385769 | SRR11855983 | NZ10 | 1991 | New_Zealand |
| SAMN12385770 | SRR9718388  | NZ11 | 1993 | New_Zealand |
| SAMN12385771 | SRR11855981 | NZ12 | 1994 | New_Zealand |
| SAMN12385772 | SRR11455753 | NZ13 | 1997 | New_Zealand |
| SAMN12385773 | SRR11455748 | NZ14 | 1999 | New_Zealand |
| SAMN12385774 | SRR11455747 | NZ15 | 2000 | New_Zealand |
| SAMN12385775 | SRR11455746 | NZ16 | 2001 | New_Zealand |
| SAMN12385776 | SRR11455744 | NZ17 | 2002 | New_Zealand |
| SAMN12385777 | SRR9718355  | NZ18 | 2002 | New_Zealand |
| SAMN12385778 | SRR9718356  | NZ19 | 2003 | New_Zealand |
| SAMN12385779 | SRR9718354  | NZ20 | 2007 | New_Zealand |
| SAMN12385780 | SRR9718347  | NZ21 | 2007 | New_Zealand |
| SAMN12385781 | SRR9718393  | NZ22 | 2013 | New_Zealand |

|              |             |      |      |             |
|--------------|-------------|------|------|-------------|
| SAMN12385782 | SRR11855974 | NZ23 | 2013 | New_Zealand |
| SAMN12385783 | SRR11855973 | NZ24 | 2014 | New_Zealand |
| SAMN12385784 | SRR11855972 | NZ25 | 2014 | New_Zealand |
| SAMN12385785 | SRR9718376  | NZ26 | 2015 | New_Zealand |
| SAMN12385786 | SRR9718375  | NZ27 | 2015 | New_Zealand |
| SAMN12385787 | SRR9718395  | NZ28 | 2016 | New_Zealand |
| SAMN12385788 | SRR9718394  | NZ29 | 2004 | New_Zealand |
| SAMN12385789 | SRR11855969 | NZ30 | 2004 | New_Zealand |
| SAMN12385790 | SRR11855968 | NZ31 | 2004 | New_Zealand |
| SAMN12385791 | SRR9718377  | NZ32 | 2005 | New_Zealand |
| SAMN12385793 | SRR11855964 | NZ34 | 2005 | New_Zealand |
| SAMN12385794 | SRR11855963 | NZ35 | 2005 | New_Zealand |
| SAMN12385795 | SRR11855962 | NZ36 | 2006 | New_Zealand |
| SAMN12385796 | SRR11855961 | NZ37 | 2006 | New_Zealand |
| SAMN12385797 | SRR9589854  | NZ38 | 2008 | New_Zealand |
| SAMN12385798 | SRR11855959 | NZ39 | 2008 | New_Zealand |
| SAMN12385799 | SRR9589849  | NZ40 | 2009 | New_Zealand |
| SAMN12385800 | SRR11855956 | NZ41 | 2009 | New_Zealand |
| SAMN12385801 | SRR9589863  | NZ42 | 2009 | New_Zealand |
| SAMN12385802 | SRR11855953 | NZ43 | 2010 | New_Zealand |
| SAMN12385803 | SRR11855952 | NZ44 | 2010 | New_Zealand |
| SAMN12385804 | SRR11855949 | NZ47 | 2012 | New_Zealand |
| SAMN12385805 | SRR11855965 | NZ57 | 2017 | New_Zealand |
| SAMN12392419 | SRR9860856  | NA   | 2018 | USA         |
| SAMN12392420 | SRR9860857  | NA   | 2018 | USA         |
| SAMN12392421 | SRR9860860  | NA   | 2018 | USA         |
| SAMN12392422 | SRR9860861  | NA   | 2018 | USA         |
| SAMN12392423 | SRR9860858  | NA   | 2018 | USA         |
| SAMN12392424 | SRR9860859  | NA   | 2018 | USA         |
| SAMN12392425 | SRR9860864  | NA   | 2018 | USA         |
| SAMN12392426 | SRR9860865  | NA   | 2018 | USA         |
| SAMN12392427 | SRR9718365  | NA   | 2018 | USA         |
| SAMN12392428 | SRR9718366  | NA   | 2018 | USA         |
| SAMN12392429 | SRR9718367  | NA   | 2018 | USA         |
| SAMN12392430 | SRR9718368  | NA   | 2018 | USA         |
| SAMN12392431 | SRR9718369  | NA   | 2018 | USA         |
| SAMN12392432 | SRR9718370  | NA   | 2018 | USA         |
| SAMN12392433 | SRR9718378  | NA   | 2018 | USA         |
| SAMN12392434 | SRR9718379  | NA   | 2018 | USA         |
| SAMN12392435 | SRR9718406  | NA   | 2018 | USA         |
| SAMN12392436 | SRR9718383  | NA   | 2018 | USA         |
| SAMN12392437 | SRR9718382  | NA   | 2018 | USA         |
| SAMN12392438 | SRR9718385  | NA   | 2018 | USA         |

|              |            |      |      |     |
|--------------|------------|------|------|-----|
| SAMN12392439 | SRR9860862 | NA   | 2018 | USA |
| SAMN12392440 | SRR9860863 | NA   | 2018 | USA |
| SAMN12392441 | SRR9860866 | NA   | 2018 | USA |
| SAMN12392442 | SRR9860867 | NA   | 2018 | USA |
| SAMN12392443 | SRR9718345 | NA   | 2019 | USA |
| SAMN12392444 | SRR9718346 | NA   | 2017 | USA |
| SAMN12523711 | SRR9997305 | NA   | 2017 | USA |
| SAMN12523712 | SRR9988754 | NA   | 2017 | USA |
| SAMN12523713 | SRR9988804 | NA   | 2017 | USA |
| SAMN12523714 | SRR9988801 | NA   | 2017 | USA |
| SAMN12523715 | SRR9988802 | NA   | 2017 | USA |
| SAMN12523716 | SRR9988807 | NA   | 2017 | USA |
| SAMN12523717 | SRR9860854 | NA   | 2017 | USA |
| SAMN12523718 | SRR9860855 | NA   | 2017 | USA |
| SAMN12523719 | SRR9860852 | NA   | 2018 | USA |
| SAMN12523720 | SRR9860853 | NA   | 2018 | USA |
| SAMN12523721 | SRR9860845 | NA   | 2018 | USA |
| SAMN12523722 | SRR9860844 | NA   | 2018 | USA |
| SAMN12523723 | SRR9860843 | NA   | 2018 | USA |
| SAMN12523724 | SRR9860842 | NA   | 2018 | USA |
| SAMN12523725 | SRR9860847 | NA   | 2018 | USA |
| SAMN12523726 | SRR9860846 | NA   | 2018 | USA |
| SAMN12523727 | SRR9988808 | NA   | 2018 | USA |
| SAMN12523728 | SRR9988805 | NA   | 2018 | USA |
| SAMN12523729 | SRR9988806 | NA   | 2018 | USA |
| SAMN12523730 | SRR9988809 | NA   | 2018 | USA |
| SAMN12523732 | SRR9988810 | K056 | 2018 | USA |
| SAMN12523733 | SRR9988764 | NA   | 2018 | USA |
| SAMN12523734 | SRR9988763 | NA   | 2018 | USA |
| SAMN12523735 | SRR9988766 | NA   | 2018 | USA |
| SAMN12523736 | SRR9988765 | NA   | 2018 | USA |
| SAMN12523737 | SRR9988768 | NA   | 2018 | USA |
| SAMN12523738 | SRR9988767 | NA   | 2018 | USA |
| SAMN12523739 | SRR9988770 | NA   | 2018 | USA |
| SAMN12523740 | SRR9988769 | NA   | 2018 | USA |
| SAMN12523741 | SRR9988762 | NA   | 2018 | USA |
| SAMN12523742 | SRR9988761 | NA   | 2018 | USA |
| SAMN12523743 | SRR9988757 | NA   | 2018 | USA |
| SAMN12523744 | SRR9988759 | NA   | 2018 | USA |
| SAMN12523745 | SRR9988760 | NA   | 2018 | USA |
| SAMN12523746 | SRR9988758 | NA   | 2018 | USA |
| SAMN12523747 | SRR9988833 | NA   | 2018 | USA |
| SAMN12523748 | SRR9988834 | NA   | 2018 | USA |

|              |             |      |      |             |
|--------------|-------------|------|------|-------------|
| SAMN12523749 | SRR9988839  | NA   | 2018 | USA         |
| SAMN12523750 | SRR9988840  | NA   | 2018 | USA         |
| SAMN12523751 | SRR9988837  | NA   | 2018 | USA         |
| SAMN12523752 | SRR9988838  | NA   | 2018 | USA         |
| SAMN12523753 | SRR9988831  | K129 | 2018 | USA         |
| SAMN12523754 | SRR9988832  | K135 | 2018 | USA         |
| SAMN12523755 | SRR9988819  | K140 | 2018 | USA         |
| SAMN12523756 | SRR9988820  | NA   | 2018 | USA         |
| SAMN12523757 | SRR9988773  | NA   | 2018 | USA         |
| SAMN12523758 | SRR9988818  | NA   | 2018 | USA         |
| SAMN12523759 | SRR9988774  | NA   | 2018 | USA         |
| SAMN12523760 | SRR9988775  | NA   | 2018 | USA         |
| SAMN12523761 | SRR9988845  | K155 | 2018 | USA         |
| SAMN12523762 | SRR9988842  | NA   | 2018 | USA         |
| SAMN12523763 | SRR9988841  | NA   | 2018 | USA         |
| SAMN12585513 | SRR11855951 | NZ45 | 2011 | New_Zealand |
| SAMN12585514 | SRR9718364  | NZ46 | 2011 | New_Zealand |
| SAMN12585515 | SRR11855948 | NZ48 | 2012 | New_Zealand |
| SAMN12585516 | SRR11855976 | NZ49 | 2012 | New_Zealand |
| SAMN12585517 | SRR11855947 | NZ50 | 2012 | New_Zealand |
| SAMN12585518 | SRR11855946 | NZ51 | 2012 | New_Zealand |
| SAMN12585519 | SRR9718357  | NZ52 | 2012 | New_Zealand |
| SAMN12585520 | SRR9718358  | NZ53 | 2012 | New_Zealand |
| SAMN12585521 | SRR11855942 | NZ54 | 2012 | New_Zealand |
| SAMN12585522 | SRR9718372  | NZ55 | 2012 | New_Zealand |
| SAMN12585523 | SRR11855940 | NZ56 | 2012 | New_Zealand |
| SAMN12585524 | SRR9718404  | NZ58 | 2017 | New_Zealand |
| SAMN12585525 | SRR11855943 | NZ59 | 2017 | New_Zealand |
| SAMN12585526 | SRR9718402  | NZ60 | 2017 | New_Zealand |
| SAMN12585527 | SRR11455729 | NZ61 | 2017 | New_Zealand |
| SAMN12585528 | SRR11455718 | NZ62 | 2017 | New_Zealand |
| SAMN12585529 | SRR11455707 | NZ63 | 2017 | New_Zealand |
| SAMN12585530 | SRR11455705 | NZ64 | 2018 | New_Zealand |
| SAMN12585531 | SRR11455704 | NZ65 | 2018 | New_Zealand |
| SAMN12585532 | SRR11455703 | NZ66 | 2018 | New_Zealand |
| SAMN12589045 | SRR10010677 | NA   | 1985 | USA         |
| SAMN12589046 | SRR10010678 | NA   | 1992 | USA         |
| SAMN12589047 | SRR10010776 | NA   | 1992 | USA         |
| SAMN12589048 | SRR10010619 | NA   | 1993 | USA         |
| SAMN12589049 | SRR10010618 | NA   | 1994 | USA         |
| SAMN12589050 | SRR10010637 | NA   | 1994 | USA         |
| SAMN12589051 | SRR10010709 | NA   | 1999 | USA         |
| SAMN12589052 | SRR10010699 | NA   | 1999 | USA         |



|              |             |    |      |     |
|--------------|-------------|----|------|-----|
| SAMN12589053 | SRR10010689 | NA | 2002 | USA |
| SAMN12589055 | SRR10010775 | NA | 2012 | USA |
| SAMN12589056 | SRR10010774 | NA | 2011 | USA |
| SAMN12589057 | SRR10010773 | NA | 2012 | USA |
| SAMN12589058 | SRR10010772 | NA | 2012 | USA |
| SAMN12589059 | SRR10010771 | NA | 2012 | USA |
| SAMN12589060 | SRR10010770 | NA | 2012 | USA |
| SAMN12589061 | SRR10010786 | NA | 2012 | USA |
| SAMN12589062 | SRR10010787 | NA | 2012 | USA |
| SAMN12589063 | SRR10010784 | NA | 2012 | USA |
| SAMN12589064 | SRR10010785 | NA | 2012 | USA |
| SAMN12589066 | SRR10010635 | NA | 2012 | USA |
| SAMN12589067 | SRR10010636 | NA | 2012 | USA |
| SAMN12589068 | SRR10010633 | NA | 2012 | USA |
| SAMN12589069 | SRR10010634 | NA | 2012 | USA |
| SAMN12589070 | SRR10010631 | NA | 2012 | USA |
| SAMN12589071 | SRR10010640 | NA | 2012 | USA |
| SAMN12589072 | SRR10010641 | NA | 2012 | USA |
| SAMN12589073 | SRR10010676 | NA | 2012 | USA |
| SAMN12589074 | SRR10010639 | NA | 2012 | USA |
| SAMN12589075 | SRR10010700 | NA | 2012 | USA |
| SAMN12589076 | SRR10010703 | NA | 2012 | USA |
| SAMN12589077 | SRR10010702 | NA | 2012 | USA |
| SAMN12589078 | SRR10010705 | NA | 2012 | USA |
| SAMN12589079 | SRR10010704 | NA | 2012 | USA |
| SAMN12589080 | SRR10010707 | NA | 2012 | USA |
| SAMN12589081 | SRR10010706 | NA | 2012 | USA |
| SAMN12589082 | SRR10010732 | NA | 2012 | USA |
| SAMN12589083 | SRR10010729 | NA | 2012 | USA |
| SAMN12589084 | SRR10010730 | NA | 2012 | USA |
| SAMN12589085 | SRR10010599 | NA | 2012 | USA |
| SAMN12589087 | SRR10010642 | NA | 2012 | USA |
| SAMN12589088 | SRR10010591 | NA | 2012 | USA |
| SAMN12589089 | SRR10010605 | NA | 2012 | USA |
| SAMN12589090 | SRR10010604 | NA | 2012 | USA |
| SAMN12589092 | SRR10010606 | NA | 2012 | USA |
| SAMN12589093 | SRR10010654 | NA | 2012 | USA |
| SAMN12589094 | SRR10010655 | NA | 2012 | USA |
| SAMN12589095 | SRR10010670 | NA | 2012 | USA |
| SAMN12589096 | SRR10010671 | NA | 2012 | USA |
| SAMN12589097 | SRR10010668 | NA | 2012 | USA |
| SAMN12589098 | SRR10010669 | NA | 2012 | USA |
| SAMN12589100 | SRR10010675 | NA | 2012 | USA |

|              |             |    |      |     |
|--------------|-------------|----|------|-----|
| SAMN12589101 | SRR10010672 | NA | 2012 | USA |
| SAMN12589102 | SRR10010735 | NA | 2012 | USA |
| SAMN12589103 | SRR10010673 | NA | 2012 | USA |
| SAMN12589104 | SRR10010666 | NA | 2012 | USA |
| SAMN12589105 | SRR10010782 | NA | 2012 | USA |
| SAMN12589106 | SRR10010783 | NA | 2012 | USA |
| SAMN12589107 | SRR10010780 | NA | 2012 | USA |
| SAMN12589108 | SRR10010781 | NA | 2012 | USA |
| SAMN12589109 | SRR10010716 | NA | 2012 | USA |
| SAMN12589110 | SRR10010768 | NA | 2012 | USA |
| SAMN12589111 | SRR10010767 | NA | 2012 | USA |
| SAMN12589112 | SRR10010766 | NA | 2012 | USA |
| SAMN12589113 | SRR10010765 | NA | 2012 | USA |
| SAMN12589114 | SRR10010741 | NA | 2012 | USA |
| SAMN12589118 | SRR10010602 | NA | 2012 | USA |
| SAMN12589120 | SRR10010608 | NA | 2012 | USA |
| SAMN12589123 | SRR10058189 | NA | 2012 | USA |
| SAMN12589125 | SRR10010736 | NA | 2012 | USA |
| SAMN12589126 | SRR10010691 | NA | 2012 | USA |
| SAMN12589127 | SRR10010690 | NA | 2012 | USA |
| SAMN12589128 | SRR10010693 | NA | 2012 | USA |
| SAMN12589129 | SRR10010692 | NA | 2012 | USA |
| SAMN12589130 | SRR10010695 | NA | 2012 | USA |
| SAMN12589131 | SRR10010694 | NA | 2012 | USA |
| SAMN12589132 | SRR10010697 | NA | 2012 | USA |
| SAMN12589133 | SRR10010696 | NA | 2012 | USA |
| SAMN12589134 | SRR10010688 | NA | 2012 | USA |
| SAMN12589135 | SRR10010667 | NA | 2012 | USA |
| SAMN12589136 | SRR10010687 | NA | 2012 | USA |
| SAMN12589137 | SRR10010714 | NA | 2012 | USA |
| SAMN12589138 | SRR10010713 | NA | 2012 | USA |
| SAMN12589139 | SRR10010712 | NA | 2012 | USA |
| SAMN12589140 | SRR10010711 | NA | 2012 | USA |
| SAMN12589142 | SRR10010652 | NA | 2012 | USA |
| SAMN12589143 | SRR10010651 | NA | 2012 | USA |
| SAMN12589144 | SRR10010650 | NA | 2012 | USA |
| SAMN12589145 | SRR10010710 | NA | 2012 | USA |
| SAMN12589146 | SRR10010737 | NA | 2012 | USA |
| SAMN12589147 | SRR10010733 | NA | 2012 | USA |
| SAMN12589148 | SRR10010734 | NA | 2012 | USA |
| SAMN12589149 | SRR10010718 | NA | 2012 | USA |
| SAMN12589150 | SRR10010719 | NA | 2012 | USA |
| SAMN12589151 | SRR10010715 | NA | 2012 | USA |

|              |             |    |      |     |
|--------------|-------------|----|------|-----|
| SAMN12589152 | SRR10010717 | NA | 2012 | USA |
| SAMN12589153 | SRR10010722 | NA | 2012 | USA |
| SAMN12589154 | SRR10010723 | NA | 2012 | USA |
| SAMN12589155 | SRR10010649 | NA | 2012 | USA |
| SAMN12589156 | SRR10010648 | NA | 2012 | USA |
| SAMN12589157 | SRR10010647 | NA | 2012 | USA |
| SAMN12589158 | SRR10010646 | NA | 2012 | USA |
| SAMN12589159 | SRR10010645 | NA | 2012 | USA |
| SAMN12589160 | SRR10010644 | NA | 2012 | USA |
| SAMN12589161 | SRR10010620 | NA | 2012 | USA |
| SAMN12589162 | SRR10010621 | NA | 2012 | USA |
| SAMN12589163 | SRR10010622 | NA | 2012 | USA |
| SAMN12589164 | SRR10010623 | NA | 2012 | USA |
| SAMN12589165 | SRR10010624 | NA | 2012 | USA |
| SAMN12589166 | SRR10010625 | NA | 2012 | USA |
| SAMN12589167 | SRR10010626 | NA | 2012 | USA |
| SAMN12589169 | SRR10010628 | NA | 2012 | USA |
| SAMN12589170 | SRR10010629 | NA | 2012 | USA |
| SAMN12589173 | SRR10010728 | NA | 2012 | USA |
| SAMN12589174 | SRR10010731 | NA | 2012 | USA |
| SAMN12589175 | SRR10010698 | NA | 2012 | USA |
| SAMN12589176 | SRR10010708 | NA | 2012 | USA |
| SAMN12589177 | SRR10010683 | NA | 2012 | USA |
| SAMN12589178 | SRR10010684 | NA | 2012 | USA |
| SAMN12589179 | SRR10010685 | NA | 2012 | USA |
| SAMN12589180 | SRR10010686 | NA | 2012 | USA |
| SAMN12589181 | SRR10010679 | NA | 2012 | USA |
| SAMN12589182 | SRR10010680 | NA | 2012 | USA |
| SAMN12589183 | SRR10010681 | NA | 2012 | USA |
| SAMN12589184 | SRR10010682 | NA | 2012 | USA |
| SAMN12589185 | SRR10058187 | NA | 2012 | USA |
| SAMN12589186 | SRR10058186 | NA | 2012 | USA |
| SAMN12589187 | SRR10058184 | NA | 2012 | USA |
| SAMN12589188 | SRR10058183 | NA | 2012 | USA |
| SAMN12589189 | SRR10058182 | NA | 2012 | USA |
| SAMN12589190 | SRR10058181 | NA | 2012 | USA |
| SAMN12589195 | SRR10010742 | NA | 2012 | USA |
| SAMN12589196 | SRR10010743 | NA | 2012 | USA |
| SAMN12589197 | SRR10010744 | NA | 2012 | USA |
| SAMN12589198 | SRR10010738 | NA | 2012 | USA |
| SAMN12589199 | SRR10010739 | NA | 2012 | USA |
| SAMN12589200 | SRR10010740 | NA | 2012 | USA |
| SAMN12589201 | SRR10010756 | NA | 2012 | USA |

|              |             |    |      |     |
|--------------|-------------|----|------|-----|
| SAMN12589202 | SRR10010755 | NA | 2012 | USA |
| SAMN12589205 | SRR10010758 | NA | 2011 | USA |
| SAMN12589206 | SRR10010720 | NA | 2011 | USA |
| SAMN12589207 | SRR10010721 | NA | 2011 | USA |
| SAMN12589208 | SRR10010724 | NA | 2011 | USA |
| SAMN12589209 | SRR10010757 | NA | 2011 | USA |
| SAMN12589210 | SRR10010760 | NA | 2011 | USA |
| SAMN12589211 | SRR10010759 | NA | 2011 | USA |
| SAMN12589212 | SRR10010762 | NA | 2011 | USA |
| SAMN12589213 | SRR10010725 | NA | 2011 | USA |
| SAMN12589215 | SRR10010761 | NA | 2011 | USA |
| SAMN12589216 | SRR10010764 | NA | 2011 | USA |
| SAMN12589217 | SRR10010763 | NA | 2011 | USA |
| SAMN12589218 | SRR10002380 | NA | 2011 | USA |
| SAMN12589219 | SRR10010749 | NA | 2011 | USA |
| SAMN12589220 | SRR10002379 | NA | 2011 | USA |
| SAMN12589221 | SRR10002378 | NA | 2011 | USA |
| SAMN12589222 | SRR10002383 | NA | 2011 | USA |
| SAMN12589223 | SRR10010750 | NA | 2011 | USA |
| SAMN12589224 | SRR10010747 | NA | 2011 | USA |
| SAMN12589225 | SRR10002385 | NA | 2011 | USA |
| SAMN12589226 | SRR10002384 | NA | 2011 | USA |
| SAMN12589227 | SRR10002386 | NA | 2011 | USA |
| SAMN12589228 | SRR10002382 | NA | 2011 | USA |
| SAMN12589229 | SRR10002381 | NA | 2011 | USA |
| SAMN12589230 | SRR10002437 | NA | 2011 | USA |
| SAMN12589231 | SRR10002438 | NA | 2011 | USA |
| SAMN12589232 | SRR10002435 | NA | 2011 | USA |
| SAMN12589233 | SRR10002436 | NA | 2011 | USA |
| SAMN12589234 | SRR10002441 | NA | 2011 | USA |
| SAMN12589235 | SRR10010748 | NA | 2011 | USA |
| SAMN12589236 | SRR10010753 | NA | 2011 | USA |
| SAMN12589237 | SRR10010754 | NA | 2012 | USA |
| SAMN12589238 | SRR10010751 | NA | 2012 | USA |
| SAMN12589239 | SRR10010752 | NA | 2012 | USA |
| SAMN12589240 | SRR10010745 | NA | 2012 | USA |
| SAMN12589241 | SRR10010746 | NA | 2012 | USA |
| SAMN12589242 | SRR10010779 | NA | 2012 | USA |
| SAMN12589243 | SRR10010778 | NA | 2012 | USA |
| SAMN12589244 | SRR10010777 | NA | 2012 | USA |
| SAMN12589245 | SRR9997185  | NA | 2012 | USA |
| SAMN12589246 | SRR9997239  | NA | 2012 | USA |
| SAMN12589247 | SRR9997241  | NA | 2012 | USA |

|              |            |    |      |     |
|--------------|------------|----|------|-----|
| SAMN12589248 | SRR9997242 | NA | 2012 | USA |
| SAMN12589249 | SRR9997131 | NA | 2012 | USA |
| SAMN12589250 | SRR9997237 | NA | 2012 | USA |
| SAMN12589251 | SRR9997132 | NA | 2012 | USA |
| SAMN12589252 | SRR9997179 | NA | 2012 | USA |
| SAMN12589253 | SRR9997238 | NA | 2012 | USA |
| SAMN12589254 | SRR9997227 | NA | 2012 | USA |
| SAMN12589255 | SRR9997284 | NA | 2012 | USA |
| SAMN12589256 | SRR9997267 | NA | 2013 | USA |
| SAMN12589257 | SRR9997280 | NA | 2013 | USA |
| SAMN12589258 | SRR9997279 | NA | 2013 | USA |
| SAMN12589259 | SRR9997282 | NA | 2013 | USA |
| SAMN12589261 | SRR9997285 | NA | 2012 | USA |
| SAMN12589262 | SRR9997283 | NA | 2012 | USA |
| SAMN12589264 | SRR9997298 | NA | 2012 | USA |
| SAMN12589265 | SRR9997178 | NA | 2012 | USA |
| SAMN12589266 | SRR9997177 | NA | 2012 | USA |
| SAMN12589267 | SRR9997164 | NA | 2012 | USA |
| SAMN12589268 | SRR9997176 | NA | 2012 | USA |
| SAMN12589269 | SRR9997175 | NA | 2012 | USA |
| SAMN12589270 | SRR9997174 | NA | 2012 | USA |
| SAMN12589271 | SRR9997144 | NA | 2012 | USA |
| SAMN12589272 | SRR9997165 | NA | 2012 | USA |
| SAMN12589273 | SRR9997159 | NA | 2012 | USA |
| SAMN12589274 | SRR9997157 | NA | 2012 | USA |
| SAMN12589275 | SRR9997301 | NA | 2012 | USA |
| SAMN12589276 | SRR9997302 | NA | 2012 | USA |
| SAMN12589277 | SRR9997314 | NA | 2012 | USA |
| SAMN12589278 | SRR9997317 | NA | 2012 | USA |
| SAMN12589279 | SRR9997315 | NA | 2012 | USA |
| SAMN12589280 | SRR9997318 | NA | 2012 | USA |
| SAMN12589281 | SRR9988747 | NA | 2012 | USA |
| SAMN12589282 | SRR9988746 | NA | 2012 | USA |
| SAMN12589283 | SRR9988745 | NA | 2012 | USA |
| SAMN12589284 | SRR9988744 | NA | 2012 | USA |
| SAMN12589285 | SRR9997138 | NA | 2012 | USA |
| SAMN12589286 | SRR9997228 | NA | 2012 | USA |
| SAMN12589287 | SRR9997200 | NA | 2012 | USA |
| SAMN12589288 | SRR9997201 | NA | 2012 | USA |
| SAMN12589289 | SRR9988751 | NA | 2012 | USA |
| SAMN12589290 | SRR9988750 | NA | 2012 | USA |
| SAMN12589291 | SRR9997139 | NA | 2012 | USA |
| SAMN12589293 | SRR9997254 | NA | 2012 | USA |

|              |            |    |      |     |
|--------------|------------|----|------|-----|
| SAMN12589294 | SRR9988749 | NA | 2012 | USA |
| SAMN12589295 | SRR9997203 | NA | 2012 | USA |
| SAMN12589297 | SRR9997142 | NA | 2012 | USA |
| SAMN12589298 | SRR9997143 | NA | 2012 | USA |
| SAMN12589299 | SRR9997202 | NA | 2012 | USA |
| SAMN12589300 | SRR9997235 | NA | 2012 | USA |
| SAMN12589301 | SRR9997236 | NA | 2012 | USA |
| SAMN12589302 | SRR9997233 | NA | 2012 | USA |
| SAMN12589303 | SRR9997234 | NA | 2012 | USA |
| SAMN12589304 | SRR9997231 | NA | 2012 | USA |
| SAMN12589305 | SRR9997232 | NA | 2012 | USA |
| SAMN12589306 | SRR9997266 | NA | 2012 | USA |
| SAMN12589307 | SRR9997229 | NA | 2012 | USA |
| SAMN12589308 | SRR9997230 | NA | 2012 | USA |
| SAMN12589309 | SRR9997195 | NA | 2012 | USA |
| SAMN12589310 | SRR9997196 | NA | 2012 | USA |
| SAMN12589311 | SRR9997265 | NA | 2012 | USA |
| SAMN12589312 | SRR9997243 | NA | 2012 | USA |
| SAMN12589313 | SRR9997197 | NA | 2012 | USA |
| SAMN12589314 | SRR9997198 | NA | 2012 | USA |
| SAMN12589315 | SRR9997244 | NA | 2012 | USA |
| SAMN12589316 | SRR9997260 | NA | 2012 | USA |
| SAMN12589317 | SRR9997259 | NA | 2012 | USA |
| SAMN12589318 | SRR9997262 | NA | 2012 | USA |
| SAMN12589319 | SRR9997261 | NA | 2012 | USA |
| SAMN12589320 | SRR9997256 | NA | 2012 | USA |
| SAMN12589321 | SRR9997255 | NA | 2012 | USA |
| SAMN12589322 | SRR9997258 | NA | 2012 | USA |
| SAMN12589323 | SRR9997191 | NA | 2012 | USA |
| SAMN12589324 | SRR9997192 | NA | 2012 | USA |
| SAMN12589325 | SRR9988748 | NA | 2012 | USA |
| SAMN12589326 | SRR9988753 | NA | 2012 | USA |
| SAMN12589327 | SRR9988752 | NA | 2012 | USA |
| SAMN12589328 | SRR9997257 | NA | 2012 | USA |
| SAMN12589329 | SRR9997264 | NA | 2012 | USA |
| SAMN12589330 | SRR9997263 | NA | 2012 | USA |
| SAMN12589331 | SRR9997312 | NA | 2012 | USA |
| SAMN12589332 | SRR9997311 | NA | 2012 | USA |
| SAMN12589333 | SRR9997310 | NA | 2012 | USA |
| SAMN12589334 | SRR9997140 | NA | 2012 | USA |
| SAMN12589335 | SRR9997141 | NA | 2012 | USA |
| SAMN12589336 | SRR9997134 | NA | 2012 | USA |
| SAMN12589337 | SRR9997135 | NA | 2012 | USA |

|              |            |    |      |     |
|--------------|------------|----|------|-----|
| SAMN12589338 | SRR9997167 | NA | 2012 | USA |
| SAMN12589339 | SRR9997166 | NA | 2012 | USA |
| SAMN12589340 | SRR9997309 | NA | 2012 | USA |
| SAMN12589341 | SRR9997169 | NA | 2012 | USA |
| SAMN12589342 | SRR9997168 | NA | 2012 | USA |
| SAMN12589343 | SRR9997287 | NA | 2012 | USA |
| SAMN12589344 | SRR9997288 | NA | 2012 | USA |
| SAMN12589346 | SRR9997194 | NA | 2012 | USA |
| SAMN12589347 | SRR9997189 | NA | 2012 | USA |
| SAMN12589348 | SRR9997190 | NA | 2012 | USA |
| SAMN12589349 | SRR9997209 | NA | 2012 | USA |
| SAMN12589352 | SRR9997206 | NA | 2012 | USA |
| SAMN12589353 | SRR9997289 | NA | 2012 | USA |
| SAMN12589354 | SRR9997290 | NA | 2012 | USA |
| SAMN12589355 | SRR9997291 | NA | 2012 | USA |
| SAMN12589356 | SRR9997292 | NA | 2012 | USA |
| SAMN12589357 | SRR9997293 | NA | 2012 | USA |
| SAMN12589358 | SRR9997294 | NA | 2012 | USA |
| SAMN12589359 | SRR9997295 | NA | 2012 | USA |
| SAMN12589360 | SRR9997296 | NA | 2012 | USA |
| SAMN12589361 | SRR9997251 | NA | 2012 | USA |
| SAMN12589362 | SRR9997250 | NA | 2012 | USA |
| SAMN12589363 | SRR9997253 | NA | 2012 | USA |
| SAMN12589364 | SRR9997252 | NA | 2013 | USA |
| SAMN12589366 | SRR9997212 | NA | 2013 | USA |
| SAMN12589367 | SRR9997211 | NA | 2013 | USA |
| SAMN12589368 | SRR9997210 | NA | 2013 | USA |
| SAMN12589369 | SRR9997205 | NA | 2013 | USA |
| SAMN12589370 | SRR9997204 | NA | 2013 | USA |
| SAMN12589371 | SRR9997225 | NA | 2013 | USA |
| SAMN12589372 | SRR9997226 | NA | 2013 | USA |
| SAMN12589373 | SRR9997221 | NA | 2013 | USA |
| SAMN12589374 | SRR9997222 | NA | 2013 | USA |
| SAMN12589375 | SRR9997219 | NA | 2013 | USA |
| SAMN12589376 | SRR9997220 | NA | 2012 | USA |
| SAMN12589377 | SRR9997217 | NA | 2012 | USA |
| SAMN12589378 | SRR9997218 | NA | 2012 | USA |
| SAMN12589379 | SRR9997299 | NA | 2012 | USA |
| SAMN12589380 | SRR9997297 | NA | 2012 | USA |
| SAMN12589381 | SRR9997278 | NA | 2012 | USA |
| SAMN12589382 | SRR9997277 | NA | 2012 | USA |
| SAMN12589383 | SRR9997276 | NA | 2012 | USA |
| SAMN12589384 | SRR9997275 | NA | 2012 | USA |

|              |             |      |      |     |
|--------------|-------------|------|------|-----|
| SAMN12589385 | SRR9997171  | NA   | 2012 | USA |
| SAMN12589386 | SRR9997170  | NA   | 2012 | USA |
| SAMN12589387 | SRR9997173  | NA   | 2012 | USA |
| SAMN12589388 | SRR9997172  | J045 | NA   | NA  |
| SAMN12589390 | SRR9997162  | NA   | 2017 | USA |
| SAMN12589391 | SRR9997161  | NA   | 2017 | USA |
| SAMN12589392 | SRR9997160  | NA   | 2017 | USA |
| SAMN12589393 | SRR9997163  | NA   | 2017 | USA |
| SAMN12589394 | SRR10002509 | NA   | 2017 | USA |
| SAMN12589395 | SRR10002510 | NA   | 2017 | USA |
| SAMN12589396 | SRR10002511 | NA   | 2017 | USA |
| SAMN12589397 | SRR10002512 | NA   | 2017 | USA |
| SAMN12589398 | SRR10002507 | NA   | 2017 | USA |
| SAMN12589399 | SRR10002508 | NA   | 2017 | USA |
| SAMN12589400 | SRR10002513 | NA   | 2017 | USA |
| SAMN12589401 | SRR10002514 | NA   | 2017 | USA |
| SAMN12589402 | SRR10002517 | NA   | 2017 | USA |
| SAMN12589403 | SRR10002516 | NA   | 2017 | USA |
| SAMN12589404 | SRR10002515 | NA   | 2017 | USA |
| SAMN12589405 | SRR9997224  | NA   | 2017 | USA |
| SAMN12589406 | SRR9997247  | NA   | 2017 | USA |
| SAMN12589407 | SRR9997246  | NA   | 2017 | USA |
| SAMN12589408 | SRR9997249  | NA   | 2017 | USA |
| SAMN12589409 | SRR9997248  | NA   | 2017 | USA |
| SAMN12589410 | SRR9997245  | NA   | 2017 | USA |
| SAMN12589411 | SRR9123573  | NA   | 2017 | USA |
| SAMN12589412 | SRR9131322  | NA   | 2017 | USA |
| SAMN12589413 | SRR9997324  | NA   | 2017 | USA |
| SAMN12589414 | SRR9997323  | NA   | 2017 | USA |
| SAMN12589415 | SRR9997326  | NA   | 2017 | USA |
| SAMN12589416 | SRR9988732  | NA   | 2017 | USA |
| SAMN12589417 | SRR9988740  | NA   | 2017 | USA |
| SAMN12589418 | SRR9988741  | NA   | 2017 | USA |
| SAMN12589419 | SRR9988738  | NA   | 2017 | USA |
| SAMN12589420 | SRR9988739  | NA   | 2017 | USA |
| SAMN12589421 | SRR9988736  | NA   | 2017 | USA |
| SAMN12589422 | SRR9988737  | NA   | 2017 | USA |
| SAMN12589423 | SRR9988734  | NA   | 2017 | USA |
| SAMN12589424 | SRR9988735  | NA   | 2017 | USA |
| SAMN12589425 | SRR9988742  | NA   | 2017 | USA |
| SAMN12589426 | SRR9997274  | NA   | 2017 | USA |
| SAMN12589427 | SRR9997273  | NA   | 2017 | USA |
| SAMN12589428 | SRR9997223  | NA   | 2017 | USA |



|              |             |    |      |     |
|--------------|-------------|----|------|-----|
| SAMN12589429 | SRR9997214  | NA | 2017 | USA |
| SAMN12589430 | SRR9997272  | NA | 2017 | USA |
| SAMN12589431 | SRR9997271  | NA | 2017 | USA |
| SAMN12589432 | SRR9997270  | NA | 2017 | USA |
| SAMN12589433 | SRR9997269  | NA | 2017 | USA |
| SAMN12589434 | SRR9997268  | NA | 2017 | USA |
| SAMN12589435 | SRR9997240  | NA | 2017 | USA |
| SAMN12589436 | SRR9997325  | NA | 2017 | USA |
| SAMN12589437 | SRR9997320  | NA | 2017 | USA |
| SAMN12589438 | SRR9997319  | NA | 2017 | USA |
| SAMN12589439 | SRR9997322  | NA | 2017 | USA |
| SAMN12589441 | SRR9997329  | NA | 2017 | USA |
| SAMN12589442 | SRR9997328  | NA | 2017 | USA |
| SAMN12589446 | SRR10002399 | NA | 2017 | USA |
| SAMN12589447 | SRR10002396 | NA | 2017 | USA |
| SAMN12589448 | SRR10002397 | NA | 2017 | USA |
| SAMN12589449 | SRR10002401 | NA | 2017 | USA |
| SAMN12589450 | SRR10002402 | NA | 2017 | USA |
| SAMN12589451 | SRR10002422 | NA | 2017 | USA |
| SAMN12589452 | SRR10002416 | NA | 2017 | USA |
| SAMN12589453 | SRR10002400 | NA | 2017 | USA |
| SAMN12589454 | SRR10002404 | NA | 2017 | USA |
| SAMN12589455 | SRR10002387 | NA | 2017 | USA |
| SAMN12589456 | SRR10002389 | NA | 2017 | USA |
| SAMN12589457 | SRR10002388 | NA | 2017 | USA |
| SAMN12589458 | SRR10002391 | NA | 2017 | USA |
| SAMN12589459 | SRR10002390 | NA | 2017 | USA |
| SAMN12589460 | SRR10002418 | NA | 2017 | USA |
| SAMN12589461 | SRR10002419 | NA | 2017 | USA |
| SAMN12589462 | SRR10002415 | NA | 2017 | USA |
| SAMN12589463 | SRR10002417 | NA | 2017 | USA |
| SAMN12589464 | SRR10002423 | NA | 2017 | USA |
| SAMN12589465 | SRR10002466 | NA | 2017 | USA |
| SAMN12589466 | SRR10002465 | NA | NA   | USA |
| SAMN12589467 | SRR10002460 | NA | NA   | USA |
| SAMN12589468 | SRR10002459 | NA | 2016 | USA |
| SAMN12589469 | SRR10002462 | NA | 2017 | USA |
| SAMN12589470 | SRR10002461 | NA | 2015 | USA |
| SAMN12589471 | SRR10002458 | NA | 2015 | USA |
| SAMN12589473 | SRR10002488 | NA | 2015 | USA |
| SAMN12589474 | SRR10002489 | NA | 2015 | USA |
| SAMN12589475 | SRR9997216  | NA | 2016 | USA |
| SAMN12589476 | SRR9997215  | NA | 2016 | USA |

|              |                 |      |      |     |
|--------------|-----------------|------|------|-----|
| SAMN12589477 | SRR9997187      | NA   | 2017 | USA |
| SAMN12589478 | SRR9997188      | NA   | 2016 | USA |
| SAMN12589479 | SRR10002486     | NA   | 2017 | USA |
| SAMN12589480 | SRR10002487     | NA   | 2017 | USA |
| SAMN12589481 | SRR9997199      | NA   | 2017 | USA |
| SAMN12589482 | SRR9997180      | NA   | 2017 | USA |
| SAMN12589483 | SRR9997184      | NA   | 2017 | USA |
| SAMN12589484 | SRR9997183      | NA   | 2017 | USA |
| SAMN12589485 | SRR10002484     | NA   | 2017 | USA |
| SAMN12589486 | SRR10002485     | NA   | 2017 | USA |
| SAMN12589487 | SRR10002482     | NA   | 2017 | USA |
| SAMN12589488 | SRR10002483     | NA   | 2017 | USA |
| SAMN12589489 | SRR10002480     | NA   | 2017 | USA |
| SAMN12589490 | SRR10002481     | NA   | 2017 | USA |
| SAMN12589491 | SRR10002504     | NA   | 2017 | USA |
| SAMN12589492 | SRR10002503     | NA   | 2017 | USA |
| SAMN12589493 | SRR10002477     | NA   | 2017 | USA |
| SAMN12589494 | SRR10002478     | NA   | 2017 | USA |
| SAMN12589495 | SRR10002479     | NA   | 2017 | USA |
| SAMN12589496 | SRR10002490     | NA   | 2018 | USA |
| SAMN12589497 | SRR10002491     | NA   | 2017 | USA |
| SAMN12589498 | SRR10002492     | NA   | 2017 | USA |
| SAMN12589499 | SRR10002453     | NA   | 2017 | USA |
| SAMN12589500 | SRR10002454     | NA   | 2017 | USA |
| SAMN12589501 | SRR10002468     | NA   | 2017 | USA |
| SAMN12589502 | SRR10002467     | NA   | 2017 | USA |
| SAMN12589503 | SRR10002470     | NA   | 2017 | USA |
| SAMN12589504 | GCA_030254605.1 |      | 2017 | USA |
| SAMN12589504 | SRR10002469     | K020 | 2017 | USA |
| SAMN12589505 | SRR9997182      | NA   | 2017 | USA |
| SAMN12589506 | GCA_030254585.1 |      | 2017 | USA |
| SAMN12589506 | SRR9997181      | K022 | 2017 | USA |
| SAMN12589507 | SRR9997186      | NA   | 2017 | USA |
| SAMN12589508 | SRR10002424     | NA   | 2018 | USA |
| SAMN12589509 | SRR10002420     | NA   | 2017 | USA |
| SAMN12589510 | SRR10002421     | NA   | 2017 | USA |
| SAMN12589511 | SRR10002472     | NA   | 2017 | USA |
| SAMN12589512 | SRR10002471     | NA   | 2017 | USA |
| SAMN12589513 | SRR10002442     | NA   | 2018 | USA |
| SAMN12589514 | SRR10002439     | NA   | 2018 | USA |
| SAMN12589515 | SRR10002474     | NA   | 2018 | USA |
| SAMN12589516 | SRR10002473     | NA   | 2018 | USA |
| SAMN12589517 | SRR10002476     | NA   | 2018 | USA |

|              |             |      |      |     |
|--------------|-------------|------|------|-----|
| SAMN12589518 | SRR10002440 | NA   | 2018 | USA |
| SAMN12589519 | SRR10002443 | NA   | 2018 | USA |
| SAMN12589520 | SRR10002475 | NA   | 2018 | USA |
| SAMN12589521 | SRR10002447 | NA   | 2018 | USA |
| SAMN12589522 | SRR10002448 | NA   | 2018 | USA |
| SAMN12589523 | SRR10002451 | NA   | 2018 | USA |
| SAMN12589524 | SRR10002452 | NA   | 2018 | USA |
| SAMN12589525 | SRR10002444 | NA   | 2018 | USA |
| SAMN12589526 | SRR10002394 | NA   | 2018 | USA |
| SAMN12589527 | SRR10002406 | NA   | 2018 | USA |
| SAMN12589528 | SRR10002395 | NA   | 2018 | USA |
| SAMN12589529 | SRR10002445 | K080 | 2018 | USA |
| SAMN12589530 | SRR10002446 | NA   | 2018 | USA |
| SAMN12589531 | SRR10002432 | NA   | 2018 | USA |
| SAMN12589532 | SRR10002431 | NA   | 2018 | USA |
| SAMN12589533 | SRR10002392 | NA   | 2018 | USA |
| SAMN12589534 | SRR10002393 | NA   | 2018 | USA |
| SAMN12589535 | SRR10002430 | K100 | 2018 | USA |
| SAMN12589536 | SRR10002429 | K102 | 2018 | USA |
| SAMN12589537 | SRR10002428 | K103 | 2018 | USA |
| SAMN12589538 | SRR10002427 | K104 | 2018 | USA |
| SAMN12589539 | SRR10002426 | K105 | 2018 | USA |
| SAMN12589540 | SRR10002425 | K106 | 2018 | USA |
| SAMN12589541 | SRR10002434 | K107 | 2018 | USA |
| SAMN12589542 | SRR10002433 | K108 | 2018 | USA |
| SAMN12589543 | SRR10002407 | K109 | 2018 | USA |
| SAMN12589544 | SRR10002408 | K111 | 2018 | USA |
| SAMN12589545 | SRR10002449 | K112 | 2018 | USA |
| SAMN12589546 | SRR10002450 | K113 | 2018 | USA |
| SAMN12589547 | SRR10002455 | K114 | 2018 | USA |
| SAMN12589548 | SRR10002456 | K115 | 2018 | USA |
| SAMN12589549 | SRR9997153  | K117 | 2018 | USA |
| SAMN12589550 | SRR9997158  | K118 | 2018 | USA |
| SAMN12589551 | SRR9997156  | K120 | 2018 | USA |
| SAMN12589552 | SRR9997151  | K124 | 2018 | USA |
| SAMN12589553 | SRR9997152  | K125 | 2018 | USA |
| SAMN12589554 | SRR9997149  | K126 | 2018 | USA |
| SAMN12589555 | SRR9997150  | K127 | 2018 | USA |
| SAMN12589557 | SRR10002409 | K130 | 2018 | USA |
| SAMN12589558 | SRR10002410 | K131 | 2018 | USA |
| SAMN12589561 | SRR9997146  | K136 | 2018 | USA |
| SAMN12589562 | SRR9997154  | K137 | 2018 | USA |
| SAMN12589563 | SRR9997155  | K138 | 2018 | USA |

|              |             |      |      |      |
|--------------|-------------|------|------|------|
| SAMN12589565 | SRR10002411 | K141 | 2018 | USA  |
| SAMN12589566 | SRR10002412 | K142 | 2018 | USA  |
| SAMN12589567 | SRR10002413 | K143 | 2018 | USA  |
| SAMN12589568 | SRR10002414 | K144 | 2018 | USA  |
| SAMN12589569 | SRR10002403 | K148 | 2018 | USA  |
| SAMN12589570 | SRR10002498 | K151 | 2018 | USA  |
| SAMN12589571 | SRR10002497 | K152 | 2018 | USA  |
| SAMN12589572 | SRR10002496 | K153 | 2018 | USA  |
| SAMN12589573 | SRR10002495 | K154 | 2018 | USA  |
| SAMN12589574 | SRR10002502 | K156 | 2018 | USA  |
| SAMN12589575 | SRR10002501 | K157 | 2018 | USA  |
| SAMN12589576 | SRR10002500 | K158 | 2018 | USA  |
| SAMN12589577 | SRR10002499 | K159 | 2018 | USA  |
| SAMN12589578 | SRR10002494 | K161 | 2018 | USA  |
| SAMN12589579 | SRR10002493 | K162 | 2018 | USA  |
| SAMN12589580 | SRR10002505 | K163 | 2018 | USA  |
| SAMN12589581 | SRR10002506 | K164 | 2018 | USA  |
| SAMN12589583 | SRR10002463 | K167 | 2018 | USA  |
| SAMN12589584 | SRR10002405 | K055 | 2018 | USA  |
| SAMN12675031 | SRR10058193 | NA   | 2008 | Iran |
| SAMN12675032 | SRR10058195 | NA   | 2009 | Iran |
| SAMN12675033 | SRR10058194 | NA   | 2009 | Iran |
| SAMN12675036 | SRR10250491 | NA   | 2012 | Iran |
| SAMN12675037 | SRR10250490 | NA   | 2012 | Iran |
| SAMN12675041 | SRR10058191 | NA   | 2012 | Iran |
| SAMN12675044 | SRR10010630 | NA   | 2013 | Iran |
| SAMN12675045 | SRR10010643 | NA   | 2013 | Iran |
| SAMN12675046 | SRR10010659 | NA   | 2013 | Iran |
| SAMN12675047 | SRR10010658 | NA   | 2013 | Iran |
| SAMN12675048 | SRR10010657 | NA   | 2013 | Iran |
| SAMN12675049 | SRR10010656 | NA   | 2013 | Iran |
| SAMN12675050 | SRR10010663 | NA   | 2013 | Iran |
| SAMN12675051 | SRR10010662 | NA   | 2013 | Iran |
| SAMN12675052 | SRR10010661 | NA   | 2013 | Iran |
| SAMN12675053 | SRR10010660 | NA   | 2013 | Iran |
| SAMN12675054 | SRR10010665 | NA   | 2013 | Iran |
| SAMN12675055 | SRR10010664 | NA   | 2013 | Iran |
| SAMN12675056 | SRR10010617 | NA   | 2014 | Iran |
| SAMN12675057 | SRR10058185 | NA   | 2014 | Iran |
| SAMN12675059 | SRR10058205 | NA   | 2014 | Iran |
| SAMN12675060 | SRR10058204 | NA   | 2014 | Iran |
| SAMN12675061 | SRR10058203 | NA   | 2014 | Iran |
| SAMN12675064 | SRR10058200 | NA   | 2015 | Iran |

|              |             |    |      |      |
|--------------|-------------|----|------|------|
| SAMN12675066 | SRR10058198 | NA | 2015 | Iran |
| SAMN12675068 | SRR10058161 | NA | 2015 | Iran |
| SAMN12675069 | SRR10058160 | NA | 2015 | Iran |
| SAMN12675070 | SRR10058174 | NA | 2015 | Iran |
| SAMN12675071 | SRR10058163 | NA | 2015 | Iran |
| SAMN12675072 | SRR10058159 | NA | 2015 | Iran |
| SAMN12675073 | SRR10058158 | NA | 2016 | Iran |
| SAMN12675074 | SRR10058157 | NA | 2016 | Iran |
| SAMN12675075 | SRR10058156 | NA | 2016 | Iran |
| SAMN12675076 | SRR10250495 | NA | 2016 | Iran |
| SAMN12675077 | SRR10250494 | NA | 2016 | Iran |
| SAMN12675078 | SRR10247378 | NA | 2016 | Iran |
| SAMN12675079 | SRR10247377 | NA | 2016 | Iran |
| SAMN12675080 | SRR10247393 | NA | 2016 | Iran |
| SAMN12675081 | SRR10247385 | NA | 2016 | Iran |
| SAMN12675082 | SRR10247384 | NA | 2016 | Iran |
| SAMN12675083 | SRR10250493 | NA | 2016 | Iran |
| SAMN12912179 | SRR10250487 | NA | 2019 | USA  |
| SAMN12912180 | SRR10806584 | NA | 2019 | USA  |
| SAMN12912181 | SRR10250486 | NA | 2019 | USA  |
| SAMN12912182 | SRR10250485 | NA | 2019 | USA  |
| SAMN12912183 | SRR10247380 | NA | 2019 | USA  |
| SAMN12912184 | SRR10247379 | NA | 2019 | USA  |
| SAMN12912185 | SRR10247399 | NA | 2019 | USA  |
| SAMN12912186 | SRR10247398 | NA | 2019 | USA  |
| SAMN12912187 | SRR10247397 | NA | 2019 | USA  |
| SAMN12912188 | SRR10247390 | NA | 2019 | USA  |
| SAMN12912189 | SRR10247389 | NA | 2019 | USA  |
| SAMN12912190 | SRR10247388 | NA | 2019 | USA  |
| SAMN12912191 | SRR10247387 | NA | 2019 | USA  |
| SAMN12912192 | SRR10247386 | NA | 2019 | USA  |
| SAMN12912193 | SRR10010615 | NA | 2019 | USA  |
| SAMN12912194 | SRR10010614 | NA | 2019 | USA  |
| SAMN12912195 | SRR10010616 | NA | 2019 | USA  |
| SAMN12912196 | SRR10010611 | NA | 2019 | USA  |
| SAMN12912197 | SRR10010610 | NA | 2019 | USA  |
| SAMN12912198 | SRR10806577 | NA | 2019 | USA  |
| SAMN12912199 | SRR10010613 | NA | 2019 | USA  |
| SAMN12912200 | SRR10010612 | NA | 2019 | USA  |
| SAMN12912201 | SRR10010592 | NA | 2019 | USA  |
| SAMN12912203 | SRR10010594 | NA | 2019 | USA  |
| SAMN12912204 | SRR10806576 | NA | 2019 | USA  |
| SAMN12912205 | SRR10806549 | NA | 2019 | USA  |

|              |             |               |      |           |
|--------------|-------------|---------------|------|-----------|
| SAMN12912206 | SRR10010595 | NA            | 2019 | USA       |
| SAMN12912207 | SRR10010596 | NA            | 2019 | USA       |
| SAMN12912208 | SRR10010597 | NA            | 2019 | USA       |
| SAMN12912209 | SRR10806546 | NA            | 2019 | USA       |
| SAMN12912210 | SRR10806630 | NA            | 2019 | USA       |
| SAMN12912211 | SRR10806619 | NA            | 2019 | USA       |
| SAMN12912212 | SRR10810109 | NA            | 2019 | USA       |
| SAMN12912213 | SRR10810108 | NA            | 2019 | USA       |
| SAMN12912214 | SRR10810107 | NA            | 2019 | USA       |
| SAMN12912215 | SRR10810106 | NA            | 2019 | USA       |
| SAMN12912216 | SRR10810105 | NA            | 2019 | USA       |
| SAMN12912217 | SRR10810104 | NA            | 2019 | USA       |
| SAMN12912218 | SRR10810103 | NA            | 2019 | USA       |
| SAMN12912219 | SRR10810102 | NA            | 2019 | USA       |
| SAMN12912220 | SRR10806608 | NA            | 2019 | USA       |
| SAMN12912221 | SRR10806606 | NA            | 2019 | USA       |
| SAMN12912222 | SRR10806605 | NA            | 2019 | USA       |
| SAMN12912223 | SRR10806651 | NA            | 2019 | USA       |
| SAMN12912224 | SRR10806650 | NA            | 2019 | USA       |
| SAMN12912225 | SRR10806649 | NA            | 2019 | USA       |
| SAMN12912226 | SRR10806648 | NA            | 2019 | USA       |
| SAMN12912227 | SRR10806647 | NA            | 2019 | USA       |
| SAMN12912228 | SRR10806646 | NA            | 2019 | USA       |
| SAMN12912229 | SRR10806645 | NA            | 2019 | USA       |
| SAMN12912230 | SRR10810101 | NA            | 2019 | USA       |
| SAMN12912231 | SRR10810100 | NA            | 2019 | USA       |
| SAMN12912232 | SRR10810099 | NA            | 2019 | USA       |
| SAMN13552790 | SRR10058165 | Not_collected | 2017 | Australia |
| SAMN13552791 | SRR10058164 | Not_collected | 2017 | Australia |
| SAMN13552792 | SRR10058167 | Not_collected | 2017 | Australia |
| SAMN13552793 | SRR10058166 | Not_collected | 2017 | Australia |
| SAMN13552794 | SRR10058168 | Not_collected | 2016 | Australia |
| SAMN13552799 | SRR10058175 | Not_collected | 2017 | Australia |
| SAMN13552800 | SRR10058173 | Not_collected | 2017 | Australia |
| SAMN13552801 | SRR10058177 | Not_collected | 2017 | Australia |
| SAMN13552802 | SRR10058176 | Not_collected | 2017 | Australia |
| SAMN13552803 | SRR10058170 | Not_collected | 2017 | Australia |
| SAMN13552804 | SRR10058169 | Not_collected | 2017 | Australia |
| SAMN13552805 | SRR10058172 | Not_collected | 2017 | Australia |
| SAMN13552806 | SRR10058171 | Not_collected | 2017 | Australia |
| SAMN13552807 | SRR10058162 | Not_collected | 2016 | Australia |
| SAMN13699847 | SRR10806545 | NA            | 2019 | USA       |
| SAMN13699848 | SRR10806544 | NA            | 2019 | USA       |

|              |                 |      |      |     |
|--------------|-----------------|------|------|-----|
| SAMN13699850 | SRR10806575     | NA   | 2019 | USA |
| SAMN13699851 | SRR10806574     | NA   | 2019 | USA |
| SAMN13699852 | SRR10806573     | NA   | 2019 | USA |
| SAMN13699853 | SRR10806572     | NA   | 2019 | USA |
| SAMN13699854 | SRR10806571     | NA   | 2019 | USA |
| SAMN13699855 | SRR10806570     | NA   | 2019 | USA |
| SAMN13699856 | SRR10806568     | NA   | 2019 | USA |
| SAMN13699857 | SRR10806567     | NA   | 2019 | USA |
| SAMN13699858 | SRR10806566     | NA   | 2019 | USA |
| SAMN13699859 | SRR10806565     | NA   | 2019 | USA |
| SAMN13699860 | SRR10806564     | NA   | 2019 | USA |
| SAMN13699861 | SRR10806563     | NA   | 2019 | USA |
| SAMN13699862 | SRR10806562     | NA   | 2019 | USA |
| SAMN13699863 | SRR10806561     | NA   | 2019 | USA |
| SAMN13699864 | SRR10806560     | NA   | 2019 | USA |
| SAMN13699865 | SRR10806559     | NA   | 2019 | USA |
| SAMN13699882 | SRR10806540     | NA   | 2019 | USA |
| SAMN13699883 | SRR10806539     | NA   | 2019 | USA |
| SAMN13699884 | SRR10806538     | NA   | 2019 | USA |
| SAMN13699885 | GCA_030254565.1 |      | 2019 | USA |
| SAMN13699885 | SRR10806537     | K557 | 2019 | USA |
| SAMN13699886 | SRR10806535     | NA   | 2019 | USA |
| SAMN13699887 | SRR10806534     | NA   | 2019 | USA |
| SAMN13699888 | SRR10806533     | NA   | 2019 | USA |
| SAMN13699889 | SRR10806532     | NA   | 2019 | USA |
| SAMN13699890 | GCA_030254545.1 |      | 2019 | USA |
| SAMN13699890 | SRR10806531     | K562 | 2019 | USA |
| SAMN13699891 | SRR10806530     | NA   | 2019 | USA |
| SAMN13699892 | SRR10806529     | NA   | 2019 | USA |
| SAMN13699893 | SRR10806528     | NA   | 2019 | USA |
| SAMN13699894 | SRR10806527     | NA   | 2019 | USA |
| SAMN13699895 | SRR10806526     | NA   | 2019 | USA |
| SAMN13699896 | SRR10806524     | NA   | 2017 | USA |
| SAMN13699897 | SRR10806675     | NA   | 2018 | USA |
| SAMN13699898 | SRR10806674     | NA   | 2012 | USA |
| SAMN13699899 | SRR10806663     | NA   | 2012 | USA |
| SAMN13699900 | SRR10806673     | NA   | 2012 | USA |
| SAMN13699901 | SRR10806672     | NA   | 2012 | USA |
| SAMN13699902 | SRR10806671     | NA   | 2012 | USA |
| SAMN13699903 | SRR10806670     | NA   | 2012 | USA |
| SAMN13699904 | SRR10806669     | NA   | 2012 | USA |
| SAMN13699905 | SRR10806668     | NA   | 2012 | USA |
| SAMN13699906 | SRR10806667     | NA   | 2012 | USA |

|              |             |    |      |     |
|--------------|-------------|----|------|-----|
| SAMN13699907 | SRR10806666 | NA | 2012 | USA |
| SAMN13699908 | SRR10806665 | NA | 2012 | USA |
| SAMN13699909 | SRR10806664 | NA | 2012 | USA |
| SAMN13699910 | SRR10806662 | NA | 2012 | USA |
| SAMN13699911 | SRR10806661 | NA | 2012 | USA |
| SAMN13699912 | SRR10806660 | NA | 2012 | USA |
| SAMN13699913 | SRR10806659 | NA | 2012 | USA |
| SAMN13699914 | SRR10806644 | NA | 2012 | USA |
| SAMN13699915 | SRR10806643 | NA | 2012 | USA |
| SAMN13699916 | SRR10806642 | NA | 2012 | USA |
| SAMN13699917 | SRR10806640 | NA | 2012 | USA |
| SAMN13699919 | SRR10806638 | NA | 2012 | USA |
| SAMN13699920 | SRR10806637 | NA | 2012 | USA |
| SAMN13699921 | SRR10806658 | NA | 2012 | USA |
| SAMN13699922 | SRR10806657 | NA | 2012 | USA |
| SAMN13699923 | SRR10806656 | NA | 2012 | USA |
| SAMN13699924 | SRR10806655 | NA | 2013 | USA |
| SAMN13699925 | SRR10806654 | NA | 2013 | USA |
| SAMN13699926 | SRR10806653 | NA | 2013 | USA |
| SAMN13699929 | SRR10250482 | NA | 2013 | USA |
| SAMN13699931 | SRR10806592 | NA | 2013 | USA |
| SAMN13699932 | SRR10250480 | NA | 2013 | USA |
| SAMN13699933 | SRR10250479 | NA | 2013 | USA |
| SAMN13699934 | SRR10250478 | NA | 2013 | USA |
| SAMN13699936 | SRR10806591 | NA | 2013 | USA |
| SAMN13699937 | SRR10806580 | NA | 2013 | USA |
| SAMN13699938 | SRR10806569 | NA | 2013 | USA |
| SAMN13699939 | SRR10806590 | NA | 2013 | USA |
| SAMN13699940 | SRR10806589 | NA | 2013 | USA |
| SAMN13699941 | SRR10806636 | NA | 2014 | USA |
| SAMN13699942 | SRR10806635 | NA | 2014 | USA |
| SAMN13699943 | SRR10806634 | NA | 2014 | USA |
| SAMN13699944 | SRR10806633 | NA | 2014 | USA |
| SAMN13699945 | SRR10806632 | NA | 2014 | USA |
| SAMN13699946 | SRR10806631 | NA | 2014 | USA |
| SAMN13699947 | SRR10806629 | NA | 2014 | USA |
| SAMN13699948 | SRR10806628 | NA | 2014 | USA |
| SAMN13699949 | SRR10806627 | NA | 2015 | USA |
| SAMN13699950 | SRR10806626 | NA | 2015 | USA |
| SAMN13699951 | SRR10806625 | NA | 2015 | USA |
| SAMN13699952 | SRR10806624 | NA | 2015 | USA |
| SAMN13699953 | SRR10806623 | NA | 2016 | USA |
| SAMN13699954 | SRR10806622 | NA | 2016 | USA |



|              |                 |                 |      |                |
|--------------|-----------------|-----------------|------|----------------|
| SAMN13699955 | SRR10806621     | NA              | 2016 | USA            |
| SAMN13699956 | SRR10806620     | NA              | 2016 | USA            |
| SAMN13699957 | SRR10806618     | NA              | 2016 | USA            |
| SAMN13699958 | SRR10806617     | NA              | 2016 | USA            |
| SAMN13699959 | SRR10806616     | NA              | 2016 | USA            |
| SAMN13699960 | SRR10806615     | NA              | 2016 | USA            |
| SAMN13699961 | SRR10806614     | NA              | 2016 | USA            |
| SAMN13699962 | SRR10806613     | NA              | 2016 | USA            |
| SAMN13699963 | SRR10806612     | NA              | 2016 | USA            |
| SAMN13699964 | SRR10806611     | NA              | 2016 | USA            |
| SAMN13699965 | SRR10806610     | NA              | 2016 | USA            |
| SAMN13699966 | SRR10806609     | NA              | 2016 | USA            |
| SAMN13699967 | SRR10806607     | NA              | 2016 | USA            |
| SAMN13699968 | SRR10806558     | K689            | 2017 | USA            |
| SAMN13699969 | SRR10806547     | NA              | 2017 | USA            |
| SAMN13699970 | SRR10806536     | NA              | 2017 | USA            |
| SAMN13699971 | SRR10806525     | NA              | 2017 | USA            |
| SAMN13699972 | SRR10806523     | NA              | 2017 | USA            |
| SAMN13699973 | SRR10806522     | NA              | 2017 | USA            |
| SAMN13699974 | SRR10806557     | NA              | 2017 | USA            |
| SAMN13699975 | SRR10806556     | NA              | 2017 | USA            |
| SAMN13699976 | SRR10806555     | NA              | 2017 | USA            |
| SAMN13699977 | GCA_030254525.1 |                 | 2019 | USA            |
| SAMN13699977 | SRR10806554     | K703            | 2019 | USA            |
| SAMN13699978 | SRR10806553     | NA              | 2019 | USA            |
| SAMN13699979 | SRR10806552     | NA              | 2019 | USA            |
| SAMN13699980 | SRR10806551     | NA              | 2019 | USA            |
| SAMN13699981 | SRR10806550     | NA              | 2019 | USA            |
| SAMN13737221 | SRR10810091     | pertussis_IR34  | 2012 | Iran           |
| SAMN13737222 | SRR10810088     | pertussis_IR37  | 2012 | Iran           |
| SAMN13737223 | SRR10810087     | pertussis_IR44  | 2014 | Iran           |
| SAMN13737224 | SRR10810094     | pertussis_IR92  | 2014 | Iran           |
| SAMN13737225 | SRR10810097     | pertussis_IR175 | 2018 | Iran           |
| SAMN13737226 | SRR10810092     | pertussis_IR178 | 2018 | Iran           |
| SAMN14002794 | SRR10806641     | UK54            | 2011 | United_Kingdom |
| SAMN14002795 | SRR10810098     | UK54            | 2011 | United_Kingdom |
| SAMN14002796 | SRR10806652     | UK54            | 2011 | United_Kingdom |
| SAMN14069732 | SRR11048706     | NA              | 2018 | China          |
| SAMN14488162 | GCA_030254505.1 |                 | 2019 | USA            |
| SAMN14488162 | SRR11455835     | K708            | 2019 | USA            |
| SAMN14488163 | SRR11455834     | NA              | 2019 | USA            |
| SAMN14488164 | SRR11455741     | NA              | 2019 | USA            |
| SAMN14488165 | SRR11455740     | NA              | 2019 | USA            |

|              |                 |      |      |     |
|--------------|-----------------|------|------|-----|
| SAMN14488166 | GCA_030254485.1 |      | 2019 | USA |
| SAMN14488166 | SRR11455699     | K712 | 2019 | USA |
| SAMN14488167 | SRR11455698     | NA   | 2019 | USA |
| SAMN14488168 | SRR11455697     | NA   | 2019 | USA |
| SAMN14488169 | SRR11455696     | NA   | 2019 | USA |
| SAMN14488170 | SRR11455694     | NA   | 2019 | USA |
| SAMN14488171 | SRR11455739     | NA   | 2019 | USA |
| SAMN14488172 | GCA_030254465.1 |      | 2019 | USA |
| SAMN14488172 | SRR11455833     | K718 | 2019 | USA |
| SAMN14488173 | SRR11455832     | NA   | 2019 | USA |
| SAMN14488174 | SRR11455831     | NA   | 2019 | USA |
| SAMN14488175 | SRR11455830     | NA   | 2019 | USA |
| SAMN14488176 | SRR11455828     | NA   | 2019 | USA |
| SAMN14488177 | SRR11455738     | NA   | 2019 | USA |
| SAMN14488178 | GCA_030254445.1 |      | 2019 | USA |
| SAMN14488178 | SRR11455737     | K724 | 2019 | USA |
| SAMN14488179 | SRR11455736     | NA   | 2019 | USA |
| SAMN14488180 | SRR11455735     | NA   | 2019 | USA |
| SAMN14488181 | SRR11455733     | NA   | 2019 | USA |
| SAMN14488182 | SRR11455732     | NA   | 2019 | USA |
| SAMN14488183 | SRR11455731     | NA   | 2019 | USA |
| SAMN14488184 | SRR11455782     | NA   | 2019 | USA |
| SAMN14488185 | SRR11455781     | NA   | 2019 | USA |
| SAMN14488186 | GCA_030254425.1 |      | 2019 | USA |
| SAMN14488186 | SRR11455780     | K734 | 2019 | USA |
| SAMN14488187 | GCA_030254405.1 |      | 2019 | USA |
| SAMN14488187 | SRR11455779     | K815 | 2019 | USA |
| SAMN14488188 | SRR11455778     | NA   | 2019 | USA |
| SAMN14488189 | SRR11455777     | NA   | 2019 | USA |
| SAMN14488190 | SRR11455776     | NA   | 2019 | USA |
| SAMN14488191 | SRR11455775     | NA   | 2019 | USA |
| SAMN14488192 | SRR11455693     | NA   | 2019 | USA |
| SAMN14488193 | SRR11455692     | NA   | 2019 | USA |
| SAMN14488194 | GCA_030254385.1 |      | 2019 | USA |
| SAMN14488194 | SRR11455691     | K822 | 2019 | USA |
| SAMN14488195 | SRR11455690     | NA   | 2019 | USA |
| SAMN14488196 | SRR11455689     | NA   | 2019 | USA |
| SAMN14488197 | SRR11455688     | NA   | 2019 | USA |
| SAMN14488198 | SRR11455687     | NA   | 2019 | USA |
| SAMN14488199 | GCA_030254365.1 |      | 2019 | USA |
| SAMN14488199 | SRR11455686     | K827 | 2019 | USA |
| SAMN14488200 | SRR11455685     | NA   | 2019 | USA |
| SAMN14488201 | SRR11455683     | NA   | 2019 | USA |

|              |                 |      |      |     |
|--------------|-----------------|------|------|-----|
| SAMN14488202 | SRR11455682     | NA   | 2019 | USA |
| SAMN14488203 | SRR11455681     | NA   | 2019 | USA |
| SAMN14488204 | GCA_030254345.1 |      | 2019 | USA |
| SAMN14488204 | SRR11455680     | K850 | 2019 | USA |
| SAMN14488205 | SRR11455679     | NA   | 2019 | USA |
| SAMN14488206 | SRR11455734     | NA   | 2019 | USA |
| SAMN14488207 | SRR11455730     | NA   | 2019 | USA |
| SAMN14488208 | GCA_030254325.1 |      | 2019 | USA |
| SAMN14488208 | SRR11455728     | K855 | 2019 | USA |
| SAMN14488209 | SRR11455727     | NA   | 2019 | USA |
| SAMN14488210 | SRR11455726     | NA   | 2019 | USA |
| SAMN14488211 | SRR11455725     | NA   | 2019 | USA |
| SAMN14488212 | SRR11455724     | NA   | 2019 | USA |
| SAMN14488213 | GCA_030254305.1 |      | 2019 | USA |
| SAMN14488213 | SRR11455723     | K860 | 2019 | USA |
| SAMN14488214 | SRR11455722     | NA   | 2019 | USA |
| SAMN14488215 | SRR11455721     | NA   | 2019 | USA |
| SAMN14488216 | SRR11455720     | NA   | 2019 | USA |
| SAMN14488217 | SRR11455719     | NA   | 2019 | USA |
| SAMN14488218 | GCA_030254285.1 |      | 2019 | USA |
| SAMN14488218 | SRR11455774     | K865 | 2019 | USA |
| SAMN14488219 | SRR11455772     | NA   | 2019 | USA |
| SAMN14488220 | SRR11455771     | NA   | 2019 | USA |
| SAMN14488221 | SRR11455717     | NA   | 2019 | USA |
| SAMN14488222 | GCA_030254265.1 |      | 2019 | USA |
| SAMN14488222 | SRR11455716     | K869 | 2019 | USA |
| SAMN14488223 | SRR11455715     | NA   | 2019 | USA |
| SAMN14488224 | SRR11455714     | NA   | 2019 | USA |
| SAMN14488225 | SRR11455713     | NA   | 2019 | USA |
| SAMN14488226 | SRR11455712     | NA   | 2019 | USA |
| SAMN14488227 | GCA_030254245.1 |      | 2019 | USA |
| SAMN14488227 | SRR11455711     | K874 | 2019 | USA |
| SAMN14488228 | SRR11455710     | NA   | 2019 | USA |
| SAMN14488229 | SRR11455709     | NA   | 2019 | USA |
| SAMN14488230 | SRR11455708     | NA   | 2019 | USA |
| SAMN14488231 | SRR11455783     | NA   | 2019 | USA |
| SAMN14488232 | GCA_030254225.1 |      | 2019 | USA |
| SAMN14488232 | SRR11855997     | K879 | 2019 | USA |
| SAMN14488233 | GCA_030254205.1 |      | 2019 | USA |
| SAMN14488233 | SRR11855996     | K880 | 2019 | USA |
| SAMN14488234 | GCA_030254185.1 |      | 2019 | USA |
| SAMN14488234 | SRR11855995     | K881 | 2019 | USA |
| SAMN14488235 | GCA_030254165.1 |      | 2019 | USA |

|              |                 |      |      |     |
|--------------|-----------------|------|------|-----|
| SAMN14488235 | SRR11855994     | K882 | 2019 | USA |
| SAMN14488236 | GCA_030254145.1 |      | 2019 | USA |
| SAMN14488236 | SRR11855993     | K883 | 2019 | USA |
| SAMN14488237 | GCA_030254125.1 |      | 2019 | USA |
| SAMN14488237 | SRR11855999     | K884 | 2019 | USA |
| SAMN14488238 | GCA_030254105.1 |      | 2019 | USA |
| SAMN14488238 | SRR11855998     | K885 | 2019 | USA |
| SAMN14488239 | GCA_030254085.1 |      | 2019 | USA |
| SAMN14488239 | SRR11455745     | K886 | 2019 | USA |
| SAMN14488240 | GCA_030254065.1 |      | 2019 | USA |
| SAMN14488240 | SRR11455706     | K887 | 2019 | USA |
| SAMN14488241 | GCA_030254045.1 |      | 2019 | USA |
| SAMN14488241 | SRR11455773     | K888 | 2019 | USA |
| SAMN14488242 | GCA_030254025.1 |      | 2019 | USA |
| SAMN14488242 | SRR11455785     | K889 | 2019 | USA |
| SAMN14488243 | SRR11455770     | NA   | 2019 | USA |
| SAMN14488244 | SRR11455769     | NA   | 2019 | USA |
| SAMN14488245 | SRR11455768     | NA   | 2019 | USA |
| SAMN14488246 | SRR11455767     | NA   | 2019 | USA |
| SAMN14488247 | GCA_030254005.1 |      | 2019 | USA |
| SAMN14488247 | SRR11455766     | K894 | 2019 | USA |
| SAMN14488248 | GCA_030253985.1 |      | 2019 | USA |
| SAMN14488248 | SRR11455765     | K895 | 2019 | USA |
| SAMN14488249 | GCA_030253965.1 |      | 2019 | USA |
| SAMN14488249 | SRR11455764     | K896 | 2019 | USA |
| SAMN14488250 | GCA_030253945.1 |      | 2019 | USA |
| SAMN14488250 | SRR11455762     | K897 | 2019 | USA |
| SAMN14488251 | SRR11455791     | NA   | 2019 | USA |
| SAMN14488252 | SRR11455790     | NA   | 2019 | USA |
| SAMN14488253 | SRR11455789     | NA   | 2019 | USA |
| SAMN14488254 | SRR11455788     | NA   | 2019 | USA |
| SAMN14488255 | SRR11455787     | K903 | 2019 | USA |
| SAMN14488256 | SRR11455786     | K904 | 2019 | USA |
| SAMN14488257 | SRR11455784     | K905 | 2019 | USA |
| SAMN14488258 | GCA_030253925.1 |      | 2019 | USA |
| SAMN14488258 | SRR11455763     | K911 | 2019 | USA |
| SAMN14488259 | SRR11455761     | NA   | 2019 | USA |
| SAMN14488260 | SRR11455760     | NA   | 2019 | USA |
| SAMN14488261 | SRR11455759     | NA   | 2019 | USA |
| SAMN14488262 | SRR11455827     | NA   | 2019 | USA |
| SAMN14488263 | GCA_030253905.1 |      | 2019 | USA |
| SAMN14488263 | SRR11455826     | K916 | 2019 | USA |
| SAMN14488264 | SRR11455825     | NA   | 2019 | USA |

|              |                 |      |      |     |
|--------------|-----------------|------|------|-----|
| SAMN14488265 | SRR11455824     | NA   | 2019 | USA |
| SAMN14488266 | SRR11455823     | NA   | 2019 | USA |
| SAMN14488267 | SRR11455822     | NA   | 2019 | USA |
| SAMN14488268 | GCA_030253885.1 |      | 2019 | USA |
| SAMN14488268 | SRR11455821     | K921 | 2019 | USA |
| SAMN14488269 | SRR11455820     | NA   | 2019 | USA |
| SAMN14488270 | SRR11455819     | NA   | 2019 | USA |
| SAMN14488271 | SRR11455817     | NA   | 2019 | USA |
| SAMN14488272 | SRR11455816     | NA   | 2019 | USA |
| SAMN14488273 | GCA_030253865.1 |      | 2019 | USA |
| SAMN14488273 | SRR11455815     | K926 | 2019 | USA |
| SAMN14488274 | SRR11455814     | NA   | 2019 | USA |
| SAMN14488275 | SRR11455813     | NA   | 2019 | USA |
| SAMN14488276 | SRR11455812     | NA   | 2019 | USA |
| SAMN14488277 | SRR11455811     | NA   | 2019 | USA |
| SAMN14488278 | SRR11455810     | K934 | 2019 | USA |
| SAMN14488279 | GCA_030253845.1 |      | 2019 | USA |
| SAMN14488279 | SRR11455809     | K936 | 2019 | USA |
| SAMN14488280 | SRR11455808     | NA   | 2019 | USA |
| SAMN14488281 | GCA_030253825.1 |      | 2019 | USA |
| SAMN14488281 | SRR11455806     | K938 | 2019 | USA |
| SAMN14488282 | SRR11455805     | NA   | 2019 | USA |
| SAMN14488283 | SRR11455804     | NA   | 2019 | USA |
| SAMN14488284 | SRR11455803     | NA   | 2019 | USA |
| SAMN14488285 | GCA_030253805.1 |      | 2019 | USA |
| SAMN14488285 | SRR11455802     | K942 | 2019 | USA |
| SAMN14488286 | SRR11455801     | NA   | 2019 | USA |
| SAMN14488287 | GCA_030253785.1 |      | 2019 | USA |
| SAMN14488287 | SRR11455800     | K944 | 2019 | USA |
| SAMN14488288 | SRR11455799     | NA   | 2019 | USA |
| SAMN14488289 | GCA_030253765.1 |      | 2018 | USA |
| SAMN14488289 | SRR11455798     | K946 | 2018 | USA |
| SAMN14488290 | GCA_030253745.1 |      | 2018 | USA |
| SAMN14488290 | SRR11455797     | K947 | 2018 | USA |
| SAMN14488291 | SRR11455795     | NA   | 2018 | USA |
| SAMN14488292 | GCA_030253725.1 |      | 2019 | USA |
| SAMN14488292 | SRR11455794     | K949 | 2019 | USA |
| SAMN14488293 | GCA_030253705.1 |      | 2019 | USA |
| SAMN14488293 | SRR11455793     | K950 | 2019 | USA |
| SAMN14488294 | GCA_030253685.1 |      | 2019 | USA |
| SAMN14488294 | SRR11455792     | K951 | 2019 | USA |
| SAMN14488295 | GCA_030253665.1 |      | 2019 | USA |
| SAMN14488295 | SRR11048613     | K952 | 2019 | USA |

|              |                 |      |      |     |
|--------------|-----------------|------|------|-----|
| SAMN14488296 | GCA_030253645.1 |      | 2019 | USA |
| SAMN14488296 | SRR11048614     | K953 | 2019 | USA |
| SAMN14488297 | GCA_030253435.1 |      | 2019 | USA |
| SAMN14488297 | SRR11048615     | K954 | 2019 | USA |
| SAMN14488298 | GCA_030253415.1 |      | 2019 | USA |
| SAMN14488298 | SRR11048616     | K955 | 2019 | USA |
| SAMN14488299 | GCA_030253395.1 |      | 2019 | USA |
| SAMN14488299 | SRR11048617     | K956 | 2019 | USA |
| SAMN14488300 | GCA_030253375.1 |      | 2019 | USA |
| SAMN14488300 | SRR11048618     | K957 | 2019 | USA |
| SAMN14488301 | GCA_030253355.1 |      | 2019 | USA |
| SAMN14488301 | SRR11048619     | K958 | 2019 | USA |
| SAMN14488302 | GCA_030253335.1 |      | 2019 | USA |
| SAMN14488302 | SRR11048620     | K959 | 2019 | USA |
| SAMN14488303 | GCA_030253315.1 |      | 2019 | USA |
| SAMN14488303 | SRR11048621     | K960 | 2019 | USA |
| SAMN14488304 | GCA_030253295.1 |      | 2019 | USA |
| SAMN14488304 | SRR11048622     | K961 | 2019 | USA |
| SAMN14488305 | GCA_030253275.1 |      | 2019 | USA |
| SAMN14488305 | SRR11048623     | K962 | 2019 | USA |
| SAMN14488306 | GCA_030253255.1 |      | 2019 | USA |
| SAMN14488306 | SRR11455758     | K963 | 2019 | USA |
| SAMN14488307 | GCA_030253235.1 |      | 2019 | USA |
| SAMN14488307 | SRR11455757     | K964 | 2019 | USA |
| SAMN14488308 | GCA_030253215.1 |      | 2019 | USA |
| SAMN14488308 | SRR11455756     | K965 | 2019 | USA |
| SAMN14488309 | GCA_030253195.1 |      | 2019 | USA |
| SAMN14488309 | SRR11455755     | K966 | 2019 | USA |
| SAMN14488310 | GCA_030253175.1 |      | 2019 | USA |
| SAMN14488310 | SRR11455754     | K967 | 2019 | USA |
| SAMN14488311 | GCA_030253155.1 |      | 2019 | USA |
| SAMN14488311 | SRR11455752     | K968 | 2019 | USA |
| SAMN14488312 | GCA_030253135.1 |      | 2019 | USA |
| SAMN14488312 | SRR11455751     | K969 | 2019 | USA |
| SAMN14488313 | GCA_030253115.1 |      | 2019 | USA |
| SAMN14488313 | SRR11455750     | K970 | 2019 | USA |
| SAMN14488314 | GCA_030253095.1 |      | 2019 | USA |
| SAMN14488314 | SRR11455749     | K971 | 2019 | USA |
| SAMN14488315 | SRR11455842     | K972 | 2019 | USA |
| SAMN14488316 | SRR11455841     | K974 | 2019 | USA |
| SAMN14488317 | SRR11455840     | K975 | 2019 | USA |
| SAMN14488318 | SRR11455829     | K977 | 2019 | USA |
| SAMN14488319 | SRR11455818     | K978 | 2017 | USA |

|              |             |      |      |         |
|--------------|-------------|------|------|---------|
| SAMN14488320 | SRR11455807 | K979 | 2018 | USA     |
| SAMN14488321 | SRR11455796 | NA   | 2020 | USA     |
| SAMN14488322 | SRR11455839 | K981 | 2017 | USA     |
| SAMN14488323 | SRR11455838 | K982 | 2017 | USA     |
| SAMN14488324 | SRR11455837 | K983 | 2018 | USA     |
| SAMN14488325 | SRR11455836 | K984 | 2020 | USA     |
| SAMN15396105 | SRR11855988 | NA   | 2019 | Austria |
| SAMN15396106 | SRR11855986 | NA   | 2019 | Austria |
| SAMN15396107 | SRR12105073 | NA   | 2020 | Austria |
| SAMN15396108 | SRR12105072 | NA   | 2020 | Austria |
| SAMN15396109 | SRR12105071 | NA   | 2020 | Austria |
| SAMN15396110 | SRR12105070 | NA   | 2020 | Austria |
| SAMN15396111 | SRR12105114 | NA   | 2020 | Austria |
| SAMN15396112 | SRR12105113 | NA   | 2020 | Austria |
| SAMN15396113 | SRR12105069 | NA   | 2020 | Austria |
| SAMN15396114 | SRR12105068 | NA   | 2019 | Austria |
| SAMN15396115 | SRR11855985 | NA   | 2019 | Austria |
| SAMN15396116 | SRR12105112 | NA   | 2019 | Austria |
| SAMN15396117 | SRR12105111 | NA   | 2019 | Austria |
| SAMN15396118 | SRR12105110 | NA   | 2019 | Austria |
| SAMN15396119 | SRR12105109 | NA   | 2019 | Austria |
| SAMN15396120 | SRR12105108 | NA   | 2019 | Austria |
| SAMN15396121 | SRR12105107 | NA   | 2019 | Austria |
| SAMN15396122 | SRR12105105 | NA   | 2019 | Austria |
| SAMN15396123 | SRR12105104 | NA   | 2019 | Austria |
| SAMN15396124 | SRR12105066 | NA   | 2019 | Austria |
| SAMN15396125 | SRR12105065 | NA   | 2019 | Austria |
| SAMN15396126 | SRR12105064 | NA   | 2019 | Austria |
| SAMN15396127 | SRR12105063 | NA   | 2019 | Austria |
| SAMN15396128 | SRR12105062 | NA   | 2019 | Austria |
| SAMN15396129 | SRR12105061 | NA   | 2019 | Austria |
| SAMN15396130 | SRR12105060 | NA   | 2019 | Austria |
| SAMN15396131 | SRR12105059 | NA   | 2019 | Austria |
| SAMN15396132 | SRR12105058 | NA   | 2019 | Austria |
| SAMN15396133 | SRR12105057 | NA   | 2019 | Austria |
| SAMN15396134 | SRR12105055 | NA   | 2019 | Austria |
| SAMN15396135 | SRR12105054 | NA   | 2018 | Austria |
| SAMN15396136 | SRR12105053 | NA   | 2018 | Austria |
| SAMN15396137 | SRR12105052 | NA   | 2018 | Austria |
| SAMN15396138 | SRR12105051 | NA   | 2018 | Austria |
| SAMN15396139 | SRR12105050 | NA   | 2018 | Austria |
| SAMN15396140 | SRR12105049 | NA   | 2018 | Austria |
| SAMN15396141 | SRR12105048 | NA   | 2019 | Austria |

|              |             |    |      |         |
|--------------|-------------|----|------|---------|
| SAMN15396142 | SRR12105047 | NA | 2019 | Austria |
| SAMN15396143 | SRR12105046 | NA | NA   | Austria |
| SAMN15396144 | SRR12105044 | NA | 2019 | Austria |
| SAMN15396145 | SRR12105085 | NA | 2019 | Austria |
| SAMN15396146 | SRR12105083 | NA | 2019 | Austria |
| SAMN15396147 | SRR12105082 | NA | 2019 | Austria |
| SAMN15396148 | SRR12105081 | NA | 2019 | Austria |
| SAMN15396149 | SRR12105080 | NA | 2019 | Austria |
| SAMN15396150 | SRR12105043 | NA | 2019 | Austria |
| SAMN15396151 | SRR12105042 | NA | 2019 | Austria |
| SAMN15396152 | SRR12105041 | NA | 2019 | Austria |
| SAMN15396153 | SRR12105040 | NA | 2019 | Austria |
| SAMN15396154 | SRR12105039 | NA | 2019 | Austria |
| SAMN15396155 | SRR12105038 | NA | NA   | Austria |
| SAMN15396156 | SRR12105103 | NA | 2019 | Austria |
| SAMN15396157 | SRR12105102 | NA | NA   | Austria |
| SAMN15396158 | SRR12105101 | NA | 2019 | Austria |
| SAMN15396159 | SRR12105100 | NA | 2019 | Austria |
| SAMN15396160 | SRR12105099 | NA | 2019 | Austria |
| SAMN15396161 | SRR12105098 | NA | 2019 | Austria |
| SAMN15396162 | SRR12105097 | NA | 2019 | Austria |
| SAMN15396163 | SRR12105096 | NA | 2019 | Austria |
| SAMN15396164 | SRR12105094 | NA | 2019 | Austria |
| SAMN15396165 | SRR12105093 | NA | 2019 | Austria |
| SAMN15396166 | SRR12105092 | NA | 2019 | Austria |
| SAMN15396167 | SRR12105091 | NA | 2019 | Austria |
| SAMN15396168 | SRR12105090 | NA | 2019 | Austria |
| SAMN15396169 | SRR12105089 | NA | 2019 | Austria |
| SAMN15396170 | SRR12105088 | NA | 2019 | Austria |
| SAMN15396172 | SRR12105086 | NA | 2019 | Austria |
| SAMN15396174 | SRR12105144 | NA | 2019 | Austria |
| SAMN15396175 | SRR12105143 | NA | 2019 | Austria |
| SAMN15396176 | SRR12105142 | NA | 2019 | Austria |
| SAMN15396177 | SRR12105141 | NA | 2019 | Austria |
| SAMN15396178 | SRR12105140 | NA | 2019 | Austria |
| SAMN15396179 | SRR12105139 | NA | 2019 | Austria |
| SAMN15396180 | SRR12105138 | NA | 2018 | Austria |
| SAMN15396181 | SRR12105137 | NA | 2019 | Austria |
| SAMN15396182 | SRR12105135 | NA | 2019 | Austria |
| SAMN15396183 | SRR12105134 | NA | 2019 | Austria |
| SAMN15396184 | SRR12105036 | NA | 2019 | Austria |
| SAMN15396185 | SRR12105035 | NA | 2019 | Austria |
| SAMN15396186 | SRR12105034 | NA | 2018 | Austria |



|              |             |    |      |                |
|--------------|-------------|----|------|----------------|
| SAMN15396187 | SRR12105033 | NA | 2018 | Austria        |
| SAMN15396188 | SRR12105032 | NA | 2018 | Austria        |
| SAMN15396189 | SRR12105031 | NA | 2019 | Austria        |
| SAMN15396190 | SRR12105030 | NA | 2019 | Austria        |
| SAMN15396191 | SRR12105029 | NA | 2019 | Austria        |
| SAMN15396192 | SRR12105028 | NA | 2018 | Austria        |
| SAMN15396193 | SRR12105027 | NA | 2019 | Austria        |
| SAMN15396194 | SRR12168686 | NA | 2018 | Austria        |
| SAMN15396195 | SRR12105106 | NA | 2018 | Austria        |
| SAMN15396196 | SRR12105095 | NA | 2018 | Austria        |
| SAMN15396197 | SRR12105136 | NA | 2019 | Austria        |
| SAMN15396198 | SRR12105125 | NA | 2019 | Austria        |
| SAMN15396199 | SRR12105121 | NA | 2019 | Austria        |
| SAMN15396200 | SRR12105120 | NA | 2019 | Austria        |
| SAMN15396201 | SRR12105119 | NA | 2019 | Austria        |
| SAMN15396202 | SRR12105118 | NA | 2019 | Austria        |
| SAMN15396203 | SRR12105117 | NA | 2018 | Austria        |
| SAMN15396204 | SRR12105116 | NA | 2018 | Austria        |
| SAMN15396205 | SRR11855984 | NA | 2018 | Austria        |
| SAMN15396206 | SRR12105133 | NA | 2018 | Austria        |
| SAMN15396207 | SRR12105132 | NA | 2018 | Austria        |
| SAMN15396208 | SRR12105131 | NA | 2018 | Austria        |
| SAMN15396209 | SRR12105130 | NA | 2018 | Austria        |
| SAMN15396210 | SRR12105129 | NA | 2018 | Austria        |
| SAMN15396211 | SRR12105128 | NA | 2018 | Austria        |
| SAMN15396212 | SRR12105127 | NA | 2018 | Austria        |
| SAMN15396214 | SRR12105124 | NA | 2018 | Austria        |
| SAMN15396215 | SRR12105123 | NA | 2018 | Austria        |
| SAMN15396216 | SRR12105122 | NA | 2018 | Austria        |
| SAMN15396217 | SRR12105149 | NA | 2018 | Austria        |
| SAMN15396218 | SRR12105148 | NA | 2018 | Austria        |
| SAMN15396219 | SRR12105147 | NA | 2018 | Austria        |
| SAMN15396220 | SRR12105146 | NA | 2018 | Austria        |
| SAMN15396221 | SRR11855939 | NA | 2018 | Austria        |
| SAMN15396222 | SRR11855938 | NA | 2018 | Austria        |
| SAMN15396223 | SRR11855937 | NA | 2018 | Austria        |
| SAMN15396224 | SRR11855992 | NA | 2018 | Austria        |
| SAMN15396225 | SRR11855991 | NA | 2018 | Austria        |
| SAMN15396226 | SRR11855990 | NA | 2018 | Austria        |
| SAMN15396227 | SRR11855989 | NA | 2018 | Austria        |
| SAMN15428627 | SRR12778238 | NA | 1993 | NA             |
| SAMN15428628 | SRR12168685 | NA | 2012 | United_Kingdom |
| SAMN15428629 | SRR12105078 | NA | 2012 | United_Kingdom |

|              |             |               |      |                |
|--------------|-------------|---------------|------|----------------|
| SAMN15428630 | SRR12105067 | NA            | 2012 | United_Kingdom |
| SAMN15428631 | SRR12105056 | NA            | 2012 | United_Kingdom |
| SAMN15428632 | SRR12105045 | NA            | 2012 | United_Kingdom |
| SAMN15428633 | SRR12105084 | NA            | 2012 | United_Kingdom |
| SAMN15428634 | SRR12105037 | NA            | 2012 | United_Kingdom |
| SAMN15428635 | SRR12105079 | NA            | 2012 | United_Kingdom |
| SAMN15428636 | SRR12105077 | NA            | 2012 | United_Kingdom |
| SAMN15428637 | SRR12105076 | NA            | 2012 | United_Kingdom |
| SAMN15428638 | SRR12105075 | NA            | 2012 | United_Kingdom |
| SAMN15428639 | SRR12105115 | NA            | 2012 | United_Kingdom |
| SAMN15428640 | SRR12105074 | NA            | 2018 | USA            |
| SAMN15702625 | SRR12168677 | NA            | 2003 | Austria        |
| SAMN16357507 | SRR13674465 | FDAARGOS_1365 | NA   | USA            |
| SAMN16357508 | SRR14288354 | FDAARGOS_1366 | NA   | USA            |
| SAMN16357509 | SRR14288351 | FDAARGOS_1367 | NA   | USA            |
| SAMN16357510 | SRR14288350 | FDAARGOS_1368 | NA   | USA            |
| SAMN16357511 | SRR14288348 | FDAARGOS_1369 | NA   | USA            |
| SAMN16378319 | SRR12778237 | NA            | 1999 | Spain          |
| SAMN16378320 | SRR12778236 | NA            | 2000 | Spain          |
| SAMN16378321 | SRR12778194 | NA            | 2000 | Spain          |
| SAMN16378322 | SRR12778193 | NA            | 2000 | Spain          |
| SAMN16378323 | SRR12778192 | NA            | 2000 | Spain          |
| SAMN16378324 | SRR12778190 | NA            | 2000 | Spain          |
| SAMN16378325 | SRR12778235 | NA            | 2000 | Spain          |
| SAMN16378326 | SRR12778234 | NA            | 2000 | Spain          |
| SAMN16378327 | SRR12778233 | NA            | 2000 | Spain          |
| SAMN16378329 | SRR12778231 | NA            | 2000 | Spain          |
| SAMN16378330 | SRR12778188 | NA            | 2002 | Spain          |
| SAMN16378331 | SRR12778187 | NA            | 2003 | Spain          |
| SAMN16378332 | SRR12778186 | NA            | 2003 | Spain          |
| SAMN16378333 | SRR12778185 | NA            | 1986 | Spain          |
| SAMN16378334 | SRR12778184 | NA            | 2007 | Spain          |
| SAMN16378335 | SRR12778183 | NA            | 2007 | Spain          |
| SAMN16378336 | SRR12778182 | NA            | 2007 | Spain          |
| SAMN16378337 | SRR12778181 | NA            | 2007 | Spain          |
| SAMN16378338 | SRR12778179 | NA            | 2007 | Spain          |
| SAMN16378339 | SRR12778178 | NA            | 2007 | Spain          |
| SAMN16378340 | SRR12778177 | NA            | 2007 | Spain          |
| SAMN16378341 | SRR12778176 | NA            | 2007 | Spain          |
| SAMN16378342 | SRR12778175 | NA            | 2008 | Spain          |
| SAMN16378343 | SRR12778174 | NA            | 2008 | Spain          |
| SAMN16378344 | SRR12778173 | NA            | 2008 | Spain          |
| SAMN16378345 | SRR12778172 | NA            | 2008 | Spain          |

|              |             |    |      |       |
|--------------|-------------|----|------|-------|
| SAMN16378346 | SRR12778171 | NA | 2008 | Spain |
| SAMN16378347 | SRR12778170 | NA | 2008 | Spain |
| SAMN16378348 | SRR12778168 | NA | 2009 | Spain |
| SAMN16378349 | SRR12778167 | NA | 2009 | Spain |
| SAMN16378350 | SRR12778166 | NA | 2009 | Spain |
| SAMN16378351 | SRR12778165 | NA | 2009 | Spain |
| SAMN16378352 | SRR12778164 | NA | 2009 | Spain |
| SAMN16378353 | SRR12778163 | NA | 2009 | Spain |
| SAMN16378354 | SRR12778162 | NA | 2010 | Spain |
| SAMN16378355 | SRR12778161 | NA | 2010 | Spain |
| SAMN16378356 | SRR12778160 | NA | 2010 | Spain |
| SAMN16378357 | SRR12778159 | NA | 2011 | Spain |
| SAMN16378358 | SRR12778157 | NA | 2011 | Spain |
| SAMN16378359 | SRR12778156 | NA | 2011 | Spain |
| SAMN16378360 | SRR12778155 | NA | 2011 | Spain |
| SAMN16378361 | SRR12778154 | NA | 2011 | Spain |
| SAMN16378362 | SRR12778153 | NA | 2011 | Spain |
| SAMN16378363 | SRR12778152 | NA | 1989 | Spain |
| SAMN16378364 | SRR12778151 | NA | 2011 | Spain |
| SAMN16378365 | SRR12778150 | NA | 2011 | Spain |
| SAMN16378366 | SRR12778149 | NA | 2011 | Spain |
| SAMN16378367 | SRR12778148 | NA | 2011 | Spain |
| SAMN16378368 | SRR12778147 | NA | 2011 | Spain |
| SAMN16378369 | SRR12778145 | NA | 1990 | Spain |
| SAMN16378370 | SRR12778144 | NA | 2011 | Spain |
| SAMN16378371 | SRR12778203 | NA | 2011 | Spain |
| SAMN16378372 | SRR12778201 | NA | 2011 | Spain |
| SAMN16378373 | SRR12778200 | NA | 2011 | Spain |
| SAMN16378374 | SRR12168676 | NA | 2011 | Spain |
| SAMN16378375 | SRR12778247 | NA | 2011 | Spain |
| SAMN16378376 | SRR12778246 | NA | 2011 | Spain |
| SAMN16378377 | SRR12778243 | NA | 2011 | Spain |
| SAMN16378378 | SRR12778232 | NA | 2011 | Spain |
| SAMN16378379 | SRR12778230 | NA | 1992 | Spain |
| SAMN16378380 | SRR12778229 | NA | 2011 | Spain |
| SAMN16378381 | SRR12778228 | NA | 2011 | Spain |
| SAMN16378382 | SRR12778227 | NA | 2011 | Spain |
| SAMN16378383 | SRR12778226 | NA | 2011 | Spain |
| SAMN16378384 | SRR12778225 | NA | 2011 | Spain |
| SAMN16378385 | SRR12778224 | NA | 1992 | Spain |
| SAMN16378386 | SRR12778223 | NA | 2012 | Spain |
| SAMN16378387 | SRR12778222 | NA | 2012 | Spain |
| SAMN16378388 | SRR12778220 | NA | 2012 | Spain |

|              |             |    |      |       |
|--------------|-------------|----|------|-------|
| SAMN16378389 | SRR12778219 | NA | 2012 | Spain |
| SAMN16378390 | SRR12778218 | NA | 2012 | Spain |
| SAMN16378391 | SRR12778217 | NA | 2012 | Spain |
| SAMN16378392 | SRR12778216 | NA | 2012 | Spain |
| SAMN16378393 | SRR12778215 | NA | 2012 | Spain |
| SAMN16378394 | SRR12778214 | NA | 2012 | Spain |
| SAMN16378395 | SRR12778213 | NA | 2012 | Spain |
| SAMN16378396 | SRR12778212 | NA | 2012 | Spain |
| SAMN16378397 | SRR12778244 | NA | 2013 | Spain |
| SAMN16378398 | SRR12778211 | NA | 2013 | Spain |
| SAMN16378399 | SRR12778210 | NA | 2013 | Spain |
| SAMN16378400 | SRR12778209 | NA | 2013 | Spain |
| SAMN16378401 | SRR12778208 | NA | 2013 | Spain |
| SAMN16378402 | SRR12778207 | NA | 2013 | Spain |
| SAMN16378403 | SRR12778206 | NA | 2013 | Spain |
| SAMN16378404 | SRR12778205 | NA | 2014 | Spain |
| SAMN16378405 | SRR12778204 | NA | 2014 | Spain |
| SAMN16378406 | SRR12369561 | NA | 2014 | Spain |
| SAMN16378407 | SRR12168842 | NA | 2014 | Spain |
| SAMN16378408 | SRR12778221 | NA | 2014 | Spain |
| SAMN16378409 | SRR12778245 | NA | 2014 | Spain |
| SAMN16378410 | SRR12778242 | NA | 2015 | Spain |
| SAMN16378411 | SRR12778395 | NA | 2015 | Spain |
| SAMN16378412 | SRR12778384 | NA | 2015 | Spain |
| SAMN16378413 | SRR12778373 | NA | 2015 | Spain |
| SAMN16378414 | SRR12778416 | NA | 2015 | Spain |
| SAMN16378415 | SRR12778415 | NA | 2015 | Spain |
| SAMN16378416 | SRR12778414 | NA | 2015 | Spain |
| SAMN16378417 | SRR12778413 | NA | 2015 | Spain |
| SAMN16378418 | SRR12778412 | NA | 2015 | Spain |
| SAMN16378419 | SRR12168841 | NA | 2015 | Spain |
| SAMN16378420 | SRR12168675 | NA | 2016 | Spain |
| SAMN16378421 | SRR12168684 | NA | 1992 | Spain |
| SAMN16378422 | SRR12168683 | NA | 1992 | Spain |
| SAMN16378423 | SRR12168682 | NA | 2017 | Spain |
| SAMN16378424 | SRR12168681 | NA | 2018 | Spain |
| SAMN16378425 | SRR12168680 | NA | 2018 | Spain |
| SAMN16378426 | SRR12168679 | NA | 2018 | Spain |
| SAMN16378427 | SRR12168678 | NA | 2018 | Spain |
| SAMN16378428 | SRR12778241 | NA | 2018 | Spain |
| SAMN16378429 | SRR12778240 | NA | 2018 | Spain |
| SAMN16378430 | SRR12778239 | NA | 2018 | Spain |
| SAMN16378543 | SRR12778411 | NA | 2018 | Spain |

|              |             |    |      |       |
|--------------|-------------|----|------|-------|
| SAMN16378544 | SRR12778410 | NA | 1996 | Spain |
| SAMN16378545 | SRR12778409 | NA | 1997 | Spain |
| SAMN16378546 | SRR12778408 | NA | 1989 | Spain |
| SAMN16378547 | SRR12778407 | NA | 1997 | Spain |
| SAMN16378548 | SRR12778405 | NA | 1998 | Spain |
| SAMN16378552 | SRR12778366 | NA | 2018 | Spain |
| SAMN16378553 | SRR12778404 | NA | 2018 | Spain |
| SAMN16378554 | SRR12778403 | NA | 2018 | Spain |
| SAMN16378555 | SRR12778402 | NA | 2018 | Spain |
| SAMN16378556 | SRR12778401 | NA | 2018 | Spain |
| SAMN16378557 | SRR12778400 | NA | 2017 | Spain |
| SAMN16378558 | SRR12778399 | NA | 2008 | Spain |
| SAMN16378559 | SRR12778398 | NA | 2015 | Spain |
| SAMN16378560 | SRR12778397 | NA | 2019 | Spain |
| SAMN16378561 | SRR12778396 | NA | 2014 | Spain |
| SAMN16378562 | SRR12778394 | NA | 2005 | Spain |
| SAMN16378563 | SRR12778393 | NA | 2018 | Spain |
| SAMN16378564 | SRR12778392 | NA | 2018 | Spain |
| SAMN16378565 | SRR12778391 | NA | 2010 | Spain |
| SAMN16378566 | SRR12778390 | NA | 2006 | Spain |
| SAMN16378567 | SRR12778389 | NA | 2011 | Spain |
| SAMN16378568 | SRR12778388 | NA | 2011 | Spain |
| SAMN16378569 | SRR12778387 | NA | 2018 | Spain |
| SAMN16378570 | SRR12778386 | NA | 2009 | Spain |
| SAMN16378571 | SRR12778385 | NA | 2011 | Spain |
| SAMN16378572 | SRR12778383 | NA | 2011 | Spain |
| SAMN16378573 | SRR12778382 | NA | 2015 | Spain |
| SAMN16378574 | SRR12778381 | NA | 2015 | Spain |
| SAMN16378575 | SRR12778380 | NA | 2015 | Spain |
| SAMN16378576 | SRR12778379 | NA | 2011 | Spain |
| SAMN16378577 | SRR12778378 | NA | 2011 | Spain |
| SAMN16378578 | SRR12778377 | NA | 2011 | Spain |
| SAMN16378579 | SRR12778376 | NA | 2011 | Spain |
| SAMN16378580 | SRR12778375 | NA | 2011 | Spain |
| SAMN16378581 | SRR12778374 | NA | 2017 | Spain |
| SAMN16378582 | SRR12778372 | NA | 2017 | Spain |
| SAMN16378583 | SRR12778371 | NA | 2013 | Spain |
| SAMN16378584 | SRR12778370 | NA | 2013 | Spain |
| SAMN16378585 | SRR12778369 | NA | 2014 | Spain |
| SAMN16378586 | SRR12778368 | NA | 2014 | Spain |
| SAMN16378587 | SRR12778367 | NA | 2014 | Spain |
| SAMN16378588 | SRR12778191 | NA | 2014 | Spain |
| SAMN16378589 | SRR12778180 | NA | 2011 | Spain |

|              |                 |                |      |           |
|--------------|-----------------|----------------|------|-----------|
| SAMN16378590 | SRR12778169     | NA             | 2011 | Spain     |
| SAMN16378591 | SRR12778158     | NA             | 2012 | Spain     |
| SAMN16378592 | SRR12778146     | NA             | 2012 | Spain     |
| SAMN16378593 | SRR12778202     | NA             | 2012 | Spain     |
| SAMN16378594 | SRR12778199     | NA             | 2016 | Spain     |
| SAMN16378595 | SRR12778198     | NA             | 2015 | Spain     |
| SAMN16378596 | SRR12778197     | NA             | 2015 | Spain     |
| SAMN16378597 | SRR12778196     | NA             | 2015 | Spain     |
| SAMN16378598 | SRR12778195     | NA             | 2017 | Spain     |
| SAMN16378599 | SRR4422992      | NA             | 2013 | Spain     |
| SAMN16378600 | SRR12778353     | NA             | 2017 | Spain     |
| SAMN16378601 | SRR12778352     | NA             | 2017 | Spain     |
| SAMN16378602 | SRR12778350     | NA             | 2017 | Spain     |
| SAMN16378603 | SRR12778349     | NA             | 2017 | Spain     |
| SAMN16378604 | SRR12778348     | NA             | 2017 | Spain     |
| SAMN16378605 | SRR12778347     | NA             | 2017 | Spain     |
| SAMN16378613 | SRR12778143     | NA             | 2018 | Spain     |
| SAMN16378614 | SRR12778142     | NA             | 2018 | Spain     |
| SAMN16378615 | SRR12778141     | NA             | 2017 | Spain     |
| SAMN16378616 | SRR12778140     | NA             | 2017 | Spain     |
| SAMN17611271 | SRR12778138     | XT-SS-BP10-2-1 | 2019 | Australia |
| SAMN17611272 | SRR12778137     | XT-SS-BP10-2-2 | 2019 | Australia |
| SAMN17611273 | SRR12778136     | XT-SS-BP10-3-1 | 2019 | Australia |
| SAMN17611274 | SRR12778418     | XT-SS-BP10-3-2 | 2019 | Australia |
| SAMN17611275 | SRR12778417     | XT-SS-BP10-4-1 | 2019 | Australia |
| SAMN17611276 | SRR12778406     | XT-SS-BP10-4-2 | 2019 | Australia |
| SAMN17611277 | ERR5101990      | FX-SS-BP10-2-1 | 2019 | Australia |
| SAMN17611278 | ERR5101991      | FX-SS-BP10-2-2 | 2019 | Australia |
| SAMN17611279 | ERR5101992      | FX-SS-BP10-3-1 | 2019 | Australia |
| SAMN17611280 | ERR5101993      | FX-SS-BP10-3-2 | 2019 | Australia |
| SAMN17611281 | SRR4422991      | FX-SS-BP10-4-1 | 2019 | Australia |
| SAMN17611282 | SRR12778139     | TN-SS-BP10-4-2 | 2019 | Australia |
| SAMN17611283 | SRR4422990      | FX-SS-BP12     | 2012 | Australia |
| SAMN17611284 | SRR4422993      | FX-SS-BP16     | 2016 | Australia |
| SAMN17611285 | SRR4423000      | FX-DS-BP10-2-1 | 2019 | Australia |
| SAMN17611286 | SRR4422994      | FX-DS-BP10-2-2 | 2019 | Australia |
| SAMN17611287 | SRR4423002      | FX-DS-BP10-3-1 | 2019 | Australia |
| SAMN17611288 | SRR4422999      | FX-DS-BP10-3-2 | 2019 | Australia |
| SAMN17611289 | SRR4423004      | FX-DS-BP10-4-1 | 2019 | Australia |
| SAMN17611290 | SRR4422998      | FX-DS-BP12     | 2012 | Australia |
| SAMN17611291 | SRR4422996      | FX-DS-BP16     | 2016 | Australia |
| SAMN17613197 | GCA_023101445.1 | shanxi001      | 2018 | China     |
| SAMN17613198 | GCA_023101465.1 | shanxi002      | 2018 | China     |

|              |                 |          |      |           |
|--------------|-----------------|----------|------|-----------|
| SAMN18200430 | GCA_017357205.1 | CIDM-BP2 | 2011 | Australia |
| SAMN18200431 | GCA_017357125.1 | CIDM-BP3 | 2015 | Australia |
| SAMN18200432 | GCA_017357165.1 | CIDM-BP5 | 2008 | Australia |
| SAMN18620668 | SRR13674461     | NA       | 1986 | USA       |
| SAMN18620669 | SRR13674463     | NA       | 1986 | USA       |
| SAMN18620670 | SRR14288291     | NA       | 1987 | USA       |
| SAMN18620682 | SRR14288290     | NA       | 1997 | USA       |
| SAMN18620683 | SRR14288289     | NA       | 1997 | USA       |
| SAMN18620684 | SRR14288287     | NA       | 1998 | USA       |
| SAMN18620685 | SRR14288285     | NA       | 1998 | USA       |
| SAMN18620686 | SRR14288284     | NA       | 1986 | USA       |
| SAMN18620687 | SRR14288283     | NA       | 1978 | USA       |
| SAMN18620688 | SRR14288282     | NA       | 1983 | USA       |
| SAMN18620690 | SRR14288280     | NA       | 1985 | USA       |
| SAMN18620691 | SRR14288279     | NA       | 1984 | USA       |
| SAMN18620692 | SRR14288278     | NA       | 1985 | USA       |
| SAMN18620693 | SRR14288276     | NA       | 1983 | USA       |
| SAMN18620695 | SRR14288275     | NA       | 1998 | USA       |
| SAMN18620696 | SRR14288274     | NA       | 1998 | USA       |
| SAMN18620697 | SRR14288273     | NA       | 1998 | USA       |
| SAMN18620698 | SRR14288272     | NA       | 1958 | USA       |
| SAMN18620699 | SRR14288271     | NA       | 1960 | USA       |
| SAMN18620700 | SRR14288270     | NA       | 1964 | USA       |
| SAMN18620701 | SRR14288269     | NA       | 1966 | USA       |
| SAMN18620702 | SRR14288268     | NA       | 1966 | USA       |
| SAMN18620703 | SRR14288267     | NA       | 1968 | USA       |
| SAMN18620704 | SRR14288265     | NA       | 1968 | USA       |
| SAMN18620705 | SRR14288264     | NA       | 1968 | USA       |
| SAMN18620706 | SRR14288263     | NA       | 1968 | USA       |
| SAMN18620707 | SRR14288262     | NA       | 1971 | USA       |
| SAMN18620708 | SRR14288261     | NA       | 1970 | USA       |
| SAMN18620709 | SRR14288260     | NA       | 1971 | USA       |
| SAMN18620710 | SRR14288259     | NA       | 1964 | USA       |
| SAMN18620711 | SRR14288258     | NA       | 1967 | USA       |
| SAMN18620712 | SRR14288257     | NA       | 1977 | USA       |
| SAMN18620713 | SRR14288256     | NA       | 1977 | USA       |
| SAMN18620714 | SRR14288320     | NA       | 1900 | USA       |
| SAMN18620715 | SRR14288319     | NA       | 1900 | USA       |
| SAMN18620716 | SRR14288318     | NA       | 1900 | USA       |
| SAMN18620717 | SRR14288317     | NA       | 1900 | USA       |
| SAMN18620718 | SRR14288250     | NA       | 1900 | USA       |
| SAMN18620719 | SRR14288249     | NA       | 1900 | USA       |
| SAMN18620720 | SRR14288248     | NA       | 1900 | USA       |

|              |                 |      |      |     |
|--------------|-----------------|------|------|-----|
| SAMN18620721 | SRR14288247     | NA   | 1900 | USA |
| SAMN18620722 | SRR14288246     | NA   | 1900 | USA |
| SAMN18620723 | SRR14288245     | NA   | 1998 | USA |
| SAMN18620724 | SRR14288243     | NA   | 1998 | USA |
| SAMN18620725 | SRR14288242     | NA   | 1998 | USA |
| SAMN18620726 | SRR14288241     | NA   | 1998 | USA |
| SAMN18620727 | SRR14288240     | NA   | 1981 | USA |
| SAMN18620728 | SRR14288239     | NA   | 1981 | USA |
| SAMN18620729 | SRR14288238     | NA   | 1986 | USA |
| SAMN18620730 | SRR14288237     | NA   | 1991 | USA |
| SAMN18620731 | SRR14288236     | NA   | 1981 | USA |
| SAMN18620732 | SRR14288235     | NA   | 1986 | USA |
| SAMN18620733 | SRR14288234     | NA   | 1982 | USA |
| SAMN18620734 | SRR14288232     | NA   | 1997 | USA |
| SAMN18620735 | SRR14288231     | NA   | 1900 | USA |
| SAMN18620744 | SRR14288230     | K985 | 2018 | USA |
| SAMN18620745 | SRR14288229     | K986 | 2018 | USA |
| SAMN18620746 | SRR14288228     | K987 | 2018 | USA |
| SAMN18620747 | SRR14288227     | K988 | 2018 | USA |
| SAMN18620748 | SRR14288226     | K989 | 2018 | USA |
| SAMN18620749 | SRR14288225     | K990 | 2018 | USA |
| SAMN18620750 | SRR14288224     | K991 | 2019 | USA |
| SAMN18620751 | SRR14288223     | K992 | 2019 | USA |
| SAMN18620753 | SRR14288220     | K994 | 2019 | USA |
| SAMN18620754 | SRR14288219     | K995 | 2019 | USA |
| SAMN18620755 | SRR14288218     | K996 | 2019 | USA |
| SAMN18620756 | SRR14288217     | K997 | 2019 | USA |
| SAMN18620757 | SRR14288216     | K998 | 2019 | USA |
| SAMN18620758 | SRR14288215     | K999 | 2019 | USA |
| SAMN18620759 | SRR14288214     | L001 | 2019 | USA |
| SAMN18620760 | SRR14288213     | L002 | 2019 | USA |
| SAMN18620761 | SRR14288212     | L003 | 2019 | USA |
| SAMN18620762 | SRR14288210     | L004 | 2019 | USA |
| SAMN18620763 | SRR14288209     | L006 | 2019 | USA |
| SAMN18620764 | SRR14288208     | L007 | 2019 | USA |
| SAMN18620765 | SRR14288207     | NA   | 2019 | USA |
| SAMN18620766 | SRR14288206     | NA   | 2019 | USA |
| SAMN18620767 | SRR14288205     | NA   | 2019 | USA |
| SAMN18620768 | GCA_030253075.1 |      | 2020 | USA |
| SAMN18620768 | SRR14288204     | L011 | 2020 | USA |
| SAMN18620769 | SRR14288203     | NA   | 2020 | USA |
| SAMN18620770 | SRR14288202     | NA   | 2020 | USA |
| SAMN18620771 | SRR14288201     | NA   | 2020 | USA |



|              |                 |      |      |     |
|--------------|-----------------|------|------|-----|
| SAMN18620772 | DRR300237       | L016 | 2020 | USA |
| SAMN18620772 | GCA_030253055.1 |      | 2020 | USA |
| SAMN18620773 | DRR300238       | NA   | 2020 | USA |
| SAMN18620774 | DRR300239       | NA   | 2020 | USA |
| SAMN18620775 | DRR300240       | NA   | 2020 | USA |
| SAMN18620776 | SRR14288346     | NA   | 2020 | USA |
| SAMN18620777 | GCA_030253035.1 |      | 2020 | USA |
| SAMN18620777 | SRR14288344     | L021 | 2020 | USA |
| SAMN18620778 | SRR14288343     | NA   | 2020 | USA |
| SAMN18620779 | SRR14288342     | NA   | 2020 | USA |
| SAMN18620780 | SRR14288341     | NA   | 2020 | USA |
| SAMN18620781 | GCA_030253015.1 |      | 2020 | USA |
| SAMN18620781 | SRR14288340     | L025 | 2020 | USA |
| SAMN18620782 | SRR14288339     | NA   | 2020 | USA |
| SAMN18620783 | SRR14288338     | NA   | 2020 | USA |
| SAMN18620784 | SRR14288337     | NA   | 2020 | USA |
| SAMN18620785 | SRR14288336     | NA   | 2020 | USA |
| SAMN18620786 | SRR14288335     | NA   | 2020 | USA |
| SAMN18620787 | GCA_030252995.1 |      | 2020 | USA |
| SAMN18620787 | SRR14288333     | L031 | 2020 | USA |
| SAMN18620788 | SRR14288332     | NA   | 2020 | USA |
| SAMN18620789 | SRR14288331     | NA   | 2020 | USA |
| SAMN18620790 | SRR14288330     | NA   | 2020 | USA |
| SAMN18620791 | SRR14288329     | NA   | 2020 | USA |
| SAMN18620792 | GCA_030252975.1 |      | 2020 | USA |
| SAMN18620792 | SRR14288328     | L036 | 2020 | USA |
| SAMN18620793 | SRR14288327     | NA   | 2020 | USA |
| SAMN18620794 | SRR14288326     | NA   | 2020 | USA |
| SAMN18620795 | SRR14288325     | NA   | 2020 | USA |
| SAMN18620796 | SRR14288324     | NA   | 2020 | USA |
| SAMN18620797 | SRR14288322     | NA   | 2020 | USA |
| SAMN18620798 | SRR14288321     | NA   | 2020 | USA |
| SAMN18620799 | ERR5102159      | NA   | 2020 | USA |
| SAMN18620800 | ERR5102160      | NA   | 2020 | USA |
| SAMN18620801 | ERR5102161      | NA   | 2020 | USA |
| SAMN18620802 | ERR5102162      | L047 | 2020 | USA |
| SAMN18620802 | GCA_030252955.1 |      | 2020 | USA |
| SAMN18620803 | ERR5102163      | NA   | 2020 | USA |
| SAMN18620804 | ERR5102164      | NA   | 2020 | USA |
| SAMN18620805 | ERR5102165      | NA   | 2020 | USA |
| SAMN18620806 | ERR5102166      | NA   | 2020 | USA |
| SAMN18620807 | ERR5102167      | L052 | 2020 | USA |
| SAMN18620807 | GCA_030252935.1 |      | 2020 | USA |

|              |                 |               |      |         |
|--------------|-----------------|---------------|------|---------|
| SAMN18620808 | SRR14288316     | NA            | 2020 | USA     |
| SAMN18620809 | GCA_030252915.1 |               | 2020 | USA     |
| SAMN18620809 | SRR14288315     | L054          | 2020 | USA     |
| SAMN18620810 | SRR14288314     | NA            | 2020 | USA     |
| SAMN18620811 | SRR14288313     | NA            | 2020 | USA     |
| SAMN18620812 | SRR14288311     | NA            | 2020 | USA     |
| SAMN18620813 | SRR14288310     | NA            | 2020 | USA     |
| SAMN18620814 | GCA_030252895.1 |               | 2020 | USA     |
| SAMN18620814 | SRR14288309     | L059          | 2020 | USA     |
| SAMN18620815 | SRR14288308     | NA            | 2020 | USA     |
| SAMN18620816 | GCA_030252875.1 |               | 2020 | USA     |
| SAMN18620816 | SRR14288307     | L061          | 2020 | USA     |
| SAMN18620817 | SRR14288306     | NA            | 2020 | USA     |
| SAMN18620818 | SRR14288305     | NA            | 2020 | USA     |
| SAMN18620819 | SRR14288304     | NA            | 2020 | USA     |
| SAMN18620820 | SRR14288303     | L066          | 2020 | USA     |
| SAMN18620821 | GCA_030252855.1 |               | 2020 | USA     |
| SAMN18620821 | SRR14288302     | L067          | 2020 | USA     |
| SAMN18620822 | SRR14288300     | L068          | 2020 | USA     |
| SAMN18620823 | SRR14288299     | L069          | 2020 | USA     |
| SAMN18620824 | SRR14288298     | L070          | 2020 | USA     |
| SAMN18620825 | GCA_030252835.1 |               | 2020 | USA     |
| SAMN18620825 | SRR14288297     | L071          | 2020 | USA     |
| SAMN18620826 | SRR14288296     | NA            | 2020 | USA     |
| SAMN18620827 | SRR14288295     | NA            | 2020 | USA     |
| SAMN18620828 | SRR14288294     | NA            | 2020 | USA     |
| SAMN18620829 | SRR14288358     | NA            | 2020 | USA     |
| SAMN18620830 | GCA_030252815.1 |               | 2020 | USA     |
| SAMN18620830 | SRR14288357     | L076          | 2020 | USA     |
| SAMN18620831 | SRR13674456     | NA            | 2020 | USA     |
| SAMN18620832 | SRR13674458     | NA            | 2020 | USA     |
| SAMN19416301 | GCA_030644705.1 | S1            | 2018 | India   |
| SAMN19416302 | GCF_030644685.1 | S2            | 2018 | India   |
| SAMN19416303 | GCA_030644665.1 | S3            | 2019 | India   |
| SAMN19416304 | GCF_030644645.1 |               | 2019 | India   |
| SAMN22091639 | SRR17522510     | FDAARGOS_1542 | NA   | Germany |
| SAMN22091640 | SRR17522503     | FDAARGOS_1543 | NA   | Germany |
| SAMN22141860 | SRR16303912     | B17005_BJ     | 2017 | China   |
| SAMN22233909 | SRR16303931     | B18017_CQ     | 2018 | China   |
| SAMN22233910 | SRR16303946     | B18022_CQ     | 2018 | China   |
| SAMN22233911 | SRR16303944     | B18028_CQ     | 2018 | China   |
| SAMN22233912 | SRR16303943     | B18042_CQ     | 2018 | China   |
| SAMN22233913 | SRR16303913     | B19046_CQ     | 2019 | China   |

|              |             |           |      |       |
|--------------|-------------|-----------|------|-------|
| SAMN22233914 | SRR16303918 | B18049_CQ | 2018 | China |
| SAMN22233915 | SRR16303919 | B18079_CQ | 2018 | China |
| SAMN22233916 | SRR16760428 | B19083_CQ | 2019 | China |
| SAMN22233917 | SRR16303917 | B18087_CQ | 2019 | China |
| SAMN22233918 | SRR16760417 | B19096_CQ | 2019 | China |
| SAMN22233919 | SRR16303938 | B19099_CQ | 2019 | China |
| SAMN22233920 | SRR16303953 | B19107_CQ | 2019 | China |
| SAMN22233921 | SRR16303937 | B19115_CQ | 2019 | China |
| SAMN22233922 | ERR6722812  | B19118_CQ | 2019 | China |
| SAMN22233923 | ERR6722813  | B19125_CQ | 2019 | China |
| SAMN22233924 | SRR16303950 | B18022_BJ | 2018 | China |
| SAMN22233925 | SRR16303945 | B18027_BJ | 2018 | China |
| SAMN22233926 | SRR16303956 | B19036_BJ | 2019 | China |
| SAMN22233927 | SRR16303955 | B19039_BJ | 2019 | China |
| SAMN22233928 | SRR16303942 | B18048_BJ | 2018 | China |
| SAMN22233929 | SRR16303929 | B18053_BJ | 2018 | China |
| SAMN22233930 | SRR16303928 | B18060_BJ | 2018 | China |
| SAMN22233931 | SRR16303927 | B18065_BJ | 2018 | China |
| SAMN22233932 | SRR16303949 | B18071_BJ | 2018 | China |
| SAMN22233933 | SRR16303939 | B19081_BJ | 2019 | China |
| SAMN22233934 | SRR16303954 | B19085_BJ | 2019 | China |
| SAMN22233935 | SRR16303952 | B19112_BJ | 2019 | China |
| SAMN22233936 | SRR16303936 | B19116_BJ | 2019 | China |
| SAMN22233937 | ERR6722814  | B19126_BJ | 2019 | China |
| SAMN22233938 | ERR6722815  | B19132_BJ | 2019 | China |
| SAMN22233939 | SRR16303951 | B18002_JX | 2018 | China |
| SAMN22233940 | SRR16303957 | B18007_JX | 2018 | China |
| SAMN22233941 | SRR16303930 | B18017_JX | 2018 | China |
| SAMN22233942 | SRR16303935 | B18022_JX | 2018 | China |
| SAMN22233943 | SRR16303947 | B18025_JX | 2018 | China |
| SAMN22233944 | SRR16303948 | B19027_JX | 2019 | China |
| SAMN22233945 | SRR16303941 | B19028_JX | 2019 | China |
| SAMN22233946 | SRR16303940 | B19030_JX | 2019 | China |
| SAMN22233947 | SRR16303922 | B19034_JX | 2019 | China |
| SAMN22233948 | SRR16303921 | B19039_JX | 2019 | China |
| SAMN22233949 | SRR16303920 | B19043_JX | 2019 | China |
| SAMN22233950 | SRR16303911 | B19047_JX | 2019 | China |
| SAMN22233951 | SRR16760430 | B19050_JX | 2019 | China |
| SAMN22233952 | SRR16760429 | B19052_JX | 2019 | China |
| SAMN22233953 | SRR16303923 | B19007_WH | 2019 | China |
| SAMN22233954 | SRR16303925 | B19006_WH | 2019 | China |
| SAMN22233955 | SRR16303924 | B19008_WH | 2019 | China |
| SAMN22233956 | SRR16306221 | B17010_NJ | 2017 | China |

|              |                 |       |      |           |
|--------------|-----------------|-------|------|-----------|
| SAMN22851881 | GCA_023612135.1 | CS    | 1951 | China     |
| SAMN22857918 | SRR16760406     | L1025 | 2008 | Australia |
| SAMN22857919 | SRR16760395     | L1026 | 2008 | Australia |
| SAMN22857920 | SRR16760284     | L1027 | 2008 | Australia |
| SAMN22857921 | SRR16760240     | L1036 | 2008 | Australia |
| SAMN22857922 | SRR16760229     | L1039 | 2008 | Australia |
| SAMN22857923 | SRR16760157     | L1040 | 2008 | Australia |
| SAMN22857924 | SRR16760208     | L1041 | 2008 | Australia |
| SAMN22857925 | SRR16760207     | L1043 | 2008 | Australia |
| SAMN22857926 | SRR16760206     | L1044 | 2008 | Australia |
| SAMN22857927 | SRR16760205     | L1045 | 2008 | Australia |
| SAMN22857928 | SRR16760427     | L1046 | 2008 | Australia |
| SAMN22857929 | SRR16760426     | L1047 | 2008 | Australia |
| SAMN22857930 | SRR16760425     | L1048 | 2008 | Australia |
| SAMN22857931 | SRR16760424     | L1049 | 2008 | Australia |
| SAMN22857932 | SRR16760340     | L1050 | 2008 | Australia |
| SAMN22857933 | SRR16760329     | L1051 | 2009 | Australia |
| SAMN22857934 | SRR16760388     | L1052 | 2009 | Australia |
| SAMN22857935 | SRR16760387     | L1053 | 2009 | Australia |
| SAMN22857936 | SRR16760386     | L1054 | 2009 | Australia |
| SAMN22857937 | SRR16760385     | L1187 | 2009 | Australia |
| SAMN22857938 | SRR16760273     | L1188 | 2009 | Australia |
| SAMN22857939 | SRR16760328     | L1189 | 2009 | Australia |
| SAMN22857940 | SRR16760327     | L1190 | 2009 | Australia |
| SAMN22857941 | SRR16760326     | L1191 | 2009 | Australia |
| SAMN22857942 | SRR16760325     | L1192 | 2009 | Australia |
| SAMN22857943 | SRR16760224     | L1193 | 2009 | Australia |
| SAMN22857944 | SRR16760222     | L1194 | 2009 | Australia |
| SAMN22857945 | SRR16760221     | L1195 | 2009 | Australia |
| SAMN22857946 | SRR16760220     | L1196 | 2009 | Australia |
| SAMN22857947 | SRR16760219     | L1197 | 2009 | Australia |
| SAMN22857948 | SRR16760218     | L1198 | 2009 | Australia |
| SAMN22857949 | SRR16760217     | L1199 | 2009 | Australia |
| SAMN22857950 | SRR16760216     | L1200 | 2009 | Australia |
| SAMN22857951 | SRR16760215     | L1201 | 2009 | Australia |
| SAMN22857952 | SRR16760214     | L1202 | 2009 | Australia |
| SAMN22857953 | SRR16760213     | L1203 | 2009 | Australia |
| SAMN22857954 | SRR16760211     | L1204 | 2009 | Australia |
| SAMN22857955 | SRR16760210     | L1205 | 2009 | Australia |
| SAMN22857956 | SRR16760209     | L1207 | 2009 | Australia |
| SAMN22857957 | SRR16760225     | L1208 | 2009 | Australia |
| SAMN22857958 | SRR16760268     | L1209 | 2009 | Australia |
| SAMN22857959 | SRR16760267     | L1210 | 2009 | Australia |

|              |             |       |      |           |
|--------------|-------------|-------|------|-----------|
| SAMN22857960 | SRR16760266 | L1211 | 2009 | Australia |
| SAMN22857961 | SRR16760204 | L1212 | 2009 | Australia |
| SAMN22857962 | SRR16760203 | L1213 | 2009 | Australia |
| SAMN22857963 | SRR16760202 | L1217 | 2009 | Australia |
| SAMN22857964 | SRR16760200 | L1218 | 2009 | Australia |
| SAMN22857965 | SRR16760199 | L1219 | 2009 | Australia |
| SAMN22857966 | SRR16760198 | L1220 | 2009 | Australia |
| SAMN22857967 | SRR16760197 | L1221 | 2009 | Australia |
| SAMN22857968 | SRR16760196 | L1222 | 2009 | Australia |
| SAMN22857969 | SRR16760195 | L1223 | 2009 | Australia |
| SAMN22857970 | SRR16760194 | L1277 | 2008 | Australia |
| SAMN22857971 | SRR16760193 | L1278 | 2008 | Australia |
| SAMN22857972 | SRR16760192 | L1279 | 2008 | Australia |
| SAMN22857973 | SRR16760191 | L1280 | 2008 | Australia |
| SAMN22857974 | SRR16760189 | L1281 | 2009 | Australia |
| SAMN22857975 | SRR16760188 | L1282 | 2010 | Australia |
| SAMN22857976 | SRR16760187 | L1283 | 2009 | Australia |
| SAMN22857977 | SRR16760186 | L1284 | 2009 | Australia |
| SAMN22857978 | SRR16760185 | L1285 | 2008 | Australia |
| SAMN22857979 | SRR16760184 | L1286 | 2010 | Australia |
| SAMN22857980 | SRR16760183 | L1287 | 2009 | Australia |
| SAMN22857981 | SRR16760182 | L1288 | 2009 | Australia |
| SAMN22857982 | SRR16760181 | L1289 | 2009 | Australia |
| SAMN22857983 | SRR16760180 | L1290 | 2009 | Australia |
| SAMN22857984 | SRR16760178 | L1291 | 2009 | Australia |
| SAMN22857985 | SRR16760177 | L1292 | 2009 | Australia |
| SAMN22857986 | SRR16760176 | L1293 | 2009 | Australia |
| SAMN22857987 | SRR16760175 | L1294 | 2009 | Australia |
| SAMN22857988 | SRR16760174 | L1295 | 2009 | Australia |
| SAMN22857989 | SRR16760173 | L1296 | 2008 | Australia |
| SAMN22857990 | SRR16760172 | L1297 | 2008 | Australia |
| SAMN22857991 | SRR16760171 | L1298 | 2009 | Australia |
| SAMN22857992 | SRR16760170 | L1299 | 2009 | Australia |
| SAMN22857993 | SRR16760169 | L1300 | 2009 | Australia |
| SAMN22857994 | SRR16760167 | L1305 | 2009 | Australia |
| SAMN22857995 | SRR16760166 | L1306 | 2008 | Australia |
| SAMN22857996 | SRR16760165 | L1307 | 2008 | Australia |
| SAMN22857997 | SRR16760164 | L1308 | 2009 | Australia |
| SAMN22857998 | SRR16760163 | L1311 | 2008 | Australia |
| SAMN22857999 | SRR16760162 | L1312 | 2008 | Australia |
| SAMN22858000 | SRR16760161 | L1313 | 2008 | Australia |
| SAMN22858001 | SRR16760160 | L1314 | 2009 | Australia |
| SAMN22858002 | SRR16760159 | L1315 | 2008 | Australia |

|              |             |       |      |           |
|--------------|-------------|-------|------|-----------|
| SAMN22858003 | SRR16760158 | L1316 | 2009 | Australia |
| SAMN22858004 | SRR16760156 | L1317 | 2010 | Australia |
| SAMN22858005 | SRR16760155 | L1318 | 2008 | Australia |
| SAMN22858007 | SRR16760153 | L1320 | 2009 | Australia |
| SAMN22858008 | SRR16760152 | L1321 | 2008 | Australia |
| SAMN22858009 | SRR16760151 | L1322 | 2009 | Australia |
| SAMN22858010 | SRR16760150 | L1323 | 2008 | Australia |
| SAMN22858011 | SRR16760149 | L1324 | 2009 | Australia |
| SAMN22858012 | SRR16760223 | L1325 | 2008 | Australia |
| SAMN22858013 | SRR16760212 | L1326 | 2008 | Australia |
| SAMN22858014 | SRR16760262 | L1327 | 2008 | Australia |
| SAMN22858015 | SRR16760251 | L1328 | 2009 | Australia |
| SAMN22858016 | SRR16760179 | L1329 | 2009 | Australia |
| SAMN22858017 | SRR16760168 | L1330 | 2009 | Australia |
| SAMN22858018 | SRR16760423 | L1331 | 2009 | Australia |
| SAMN22858019 | SRR16760422 | L1332 | 2009 | Australia |
| SAMN22858020 | SRR16760421 | L1333 | 2009 | Australia |
| SAMN22858021 | SRR16760420 | L1334 | 2009 | Australia |
| SAMN22858022 | SRR16760419 | L1335 | 2009 | Australia |
| SAMN22858023 | SRR16760418 | L1336 | 2009 | Australia |
| SAMN22858024 | SRR16760416 | L1337 | 2009 | Australia |
| SAMN22858025 | SRR16760415 | L1338 | 2009 | Australia |
| SAMN22858026 | SRR16760414 | L1339 | 2010 | Australia |
| SAMN22858027 | SRR16760413 | L1340 | 2010 | Australia |
| SAMN22858028 | SRR16760412 | L1341 | 2010 | Australia |
| SAMN22858029 | SRR16760411 | L1342 | 2010 | Australia |
| SAMN22858030 | SRR16760410 | L1343 | 2010 | Australia |
| SAMN22858031 | SRR16760409 | L1344 | 2010 | Australia |
| SAMN22858032 | SRR16760408 | L1345 | 2010 | Australia |
| SAMN22858033 | SRR16760407 | L1346 | 2010 | Australia |
| SAMN22858034 | SRR16760405 | L1347 | 2010 | Australia |
| SAMN22858035 | SRR16760404 | L1348 | 2010 | Australia |
| SAMN22858036 | SRR16760403 | L1349 | 2010 | Australia |
| SAMN22858037 | SRR16760402 | L1350 | 2010 | Australia |
| SAMN22858038 | SRR16760401 | L1351 | 2010 | Australia |
| SAMN22858039 | SRR16760400 | L1352 | 2010 | Australia |
| SAMN22858040 | SRR16760399 | L1353 | 2010 | Australia |
| SAMN22858041 | SRR16760398 | L1354 | 2010 | Australia |
| SAMN22858042 | SRR16760397 | L1355 | 2010 | Australia |
| SAMN22858043 | SRR16760396 | L1356 | 2010 | Australia |
| SAMN22858044 | SRR16760394 | L1358 | 2008 | Australia |
| SAMN22858045 | SRR16760393 | L1359 | 2008 | Australia |
| SAMN22858046 | SRR16760392 | L1360 | 2009 | Australia |

|              |             |       |      |           |
|--------------|-------------|-------|------|-----------|
| SAMN22858047 | SRR16760391 | L1362 | 2009 | Australia |
| SAMN22858048 | SRR16760390 | L1363 | 2009 | Australia |
| SAMN22858049 | SRR16760389 | L1364 | 2009 | Australia |
| SAMN22858050 | SRR16303934 | L1365 | 2010 | Australia |
| SAMN22858051 | SRR16303933 | L1366 | 2010 | Australia |
| SAMN22858052 | SRR16303958 | L1367 | 2010 | Australia |
| SAMN22858053 | SRR16303932 | L1369 | 2008 | Australia |
| SAMN22858054 | SRR16760383 | L1370 | 2009 | Australia |
| SAMN22858055 | SRR16760382 | L1371 | 2009 | Australia |
| SAMN22858056 | SRR16760381 | L1373 | 2009 | Australia |
| SAMN22858057 | SRR16760380 | L1374 | 2009 | Australia |
| SAMN22858058 | SRR16760379 | L1375 | 2010 | Australia |
| SAMN22858059 | SRR16760378 | L1377 | 2010 | Australia |
| SAMN22858060 | SRR16760377 | L1378 | 2010 | Australia |
| SAMN22858061 | SRR16760376 | L1381 | 2009 | Australia |
| SAMN22858062 | SRR16760375 | L1383 | 2009 | Australia |
| SAMN22858063 | SRR16760374 | L1384 | 2009 | Australia |
| SAMN22858064 | SRR16760372 | L1385 | 2009 | Australia |
| SAMN22858065 | SRR16760371 | L1386 | 2010 | Australia |
| SAMN22858066 | SRR16760370 | L1387 | 2010 | Australia |
| SAMN22858067 | SRR16760369 | L1388 | 2010 | Australia |
| SAMN22858068 | SRR16760368 | L1389 | 2010 | Australia |
| SAMN22858069 | SRR16760367 | L1392 | 2009 | Australia |
| SAMN22858070 | SRR16760366 | L1393 | 2009 | Australia |
| SAMN22858071 | SRR16760365 | L1394 | 2009 | Australia |
| SAMN22858072 | SRR16760364 | L1395 | 2009 | Australia |
| SAMN22858073 | SRR16760363 | L1396 | 2009 | Australia |
| SAMN22858074 | SRR16760361 | L1398 | 2010 | Australia |
| SAMN22858075 | SRR16760360 | L1399 | 2010 | Australia |
| SAMN22858076 | SRR16760359 | L1400 | 2010 | Australia |
| SAMN22858077 | SRR16760358 | L1414 | 2010 | Australia |
| SAMN22858078 | SRR16760357 | L1415 | 2009 | Australia |
| SAMN22858079 | SRR16760356 | L1416 | 2009 | Australia |
| SAMN22858080 | SRR16760355 | L1417 | 2009 | Australia |
| SAMN22858081 | SRR16760354 | L1418 | 2009 | Australia |
| SAMN22858082 | SRR16760353 | L1420 | 2010 | Australia |
| SAMN22858083 | SRR16760352 | L1422 | 2010 | Australia |
| SAMN22858084 | SRR16760350 | L1424 | 2010 | Australia |
| SAMN22858085 | SRR16760349 | L1425 | 2010 | Australia |
| SAMN22858086 | SRR16760348 | L1426 | 2010 | Australia |
| SAMN22858087 | SRR16760347 | L1427 | 2009 | Australia |
| SAMN22858088 | SRR16760346 | L1428 | 2009 | Australia |
| SAMN22858089 | SRR16760345 | L1429 | 2010 | Australia |

|              |             |       |      |           |
|--------------|-------------|-------|------|-----------|
| SAMN22858090 | SRR16760344 | L1430 | 2010 | Australia |
| SAMN22858091 | SRR16760343 | L1431 | 2010 | Australia |
| SAMN22858092 | SRR16760342 | L1432 | 2010 | Australia |
| SAMN22858093 | SRR16760341 | L1433 | 2010 | Australia |
| SAMN22858094 | SRR16760339 | L1492 | 2011 | Australia |
| SAMN22858095 | SRR16760338 | L1494 | 2011 | Australia |
| SAMN22858096 | SRR16760337 | L1495 | 2011 | Australia |
| SAMN22858097 | SRR16760336 | L1496 | 2011 | Australia |
| SAMN22858098 | SRR16760335 | L1497 | 2011 | Australia |
| SAMN22858099 | SRR16760334 | L1498 | 2011 | Australia |
| SAMN22858100 | SRR16760333 | L1499 | 2011 | Australia |
| SAMN22858101 | SRR16760332 | L1500 | 2011 | Australia |
| SAMN22858102 | SRR16760331 | L1501 | 2011 | Australia |
| SAMN22858103 | SRR16760330 | L1502 | 2011 | Australia |
| SAMN22858104 | SRR16306222 | L1503 | 2011 | Australia |
| SAMN22858105 | SRR16303916 | L1504 | 2011 | Australia |
| SAMN22858106 | SRR16303915 | L1505 | 2011 | Australia |
| SAMN22858107 | SRR16303914 | L1506 | 2011 | Australia |
| SAMN22858108 | SRR16760324 | L1508 | 2011 | Australia |
| SAMN22858109 | SRR16760323 | L1512 | 2010 | Australia |
| SAMN22858110 | SRR16760322 | L1513 | 2010 | Australia |
| SAMN22858111 | SRR16760321 | L1514 | 2010 | Australia |
| SAMN22858112 | SRR16760320 | L1515 | 2010 | Australia |
| SAMN22858113 | SRR16760319 | L1516 | 2010 | Australia |
| SAMN22858114 | SRR16760316 | L1517 | 2010 | Australia |
| SAMN22858115 | SRR16760315 | L1518 | 2010 | Australia |
| SAMN22858116 | SRR16760314 | L1519 | 2010 | Australia |
| SAMN22858117 | SRR16760313 | L1521 | 2011 | Australia |
| SAMN22858118 | SRR16760312 | L1523 | 2011 | Australia |
| SAMN22858119 | SRR16760311 | L1525 | 2011 | Australia |
| SAMN22858120 | SRR16760310 | L1526 | 2011 | Australia |
| SAMN22858121 | SRR16760309 | L1527 | 2011 | Australia |
| SAMN22858122 | SRR16760308 | L1528 | 2011 | Australia |
| SAMN22858123 | SRR16760307 | L1529 | 2011 | Australia |
| SAMN22858124 | SRR16760305 | L1530 | 2011 | Australia |
| SAMN22858125 | SRR16760304 | L1532 | 2011 | Australia |
| SAMN22858126 | SRR16760303 | L1533 | 2011 | Australia |
| SAMN22858127 | SRR16760302 | L1534 | 2011 | Australia |
| SAMN22858128 | SRR16760301 | L1536 | 2011 | Australia |
| SAMN22858129 | SRR16760300 | L1538 | 2011 | Australia |
| SAMN22858130 | SRR16760299 | L1539 | 2011 | Australia |
| SAMN22858131 | SRR16760298 | L1540 | 2011 | Australia |
| SAMN22858132 | SRR16760297 | L1541 | 2011 | Australia |



|              |             |       |      |           |
|--------------|-------------|-------|------|-----------|
| SAMN22858133 | SRR16760296 | L1542 | 2011 | Australia |
| SAMN22858134 | SRR16760294 | L1543 | 2011 | Australia |
| SAMN22858135 | SRR16760293 | L1544 | 2011 | Australia |
| SAMN22858136 | SRR16760292 | L1546 | 2011 | Australia |
| SAMN22858137 | SRR16760291 | L1547 | 2011 | Australia |
| SAMN22858138 | SRR16760290 | L1548 | 2011 | Australia |
| SAMN22858139 | SRR16760289 | L1549 | 2011 | Australia |
| SAMN22858140 | SRR16760288 | L1550 | 2011 | Australia |
| SAMN22858141 | SRR16760287 | L1551 | 2011 | Australia |
| SAMN22858142 | SRR16760286 | L1552 | 2011 | Australia |
| SAMN22858143 | SRR16760285 | L1553 | 2011 | Australia |
| SAMN22858144 | SRR16760283 | L1554 | 2011 | Australia |
| SAMN22858145 | SRR16760282 | L1555 | 2011 | Australia |
| SAMN22858146 | SRR16760281 | L1556 | 2011 | Australia |
| SAMN22858147 | SRR16760280 | L1557 | 2011 | Australia |
| SAMN22858148 | SRR16760279 | L1558 | 2011 | Australia |
| SAMN22858149 | SRR16760278 | L1559 | 2011 | Australia |
| SAMN22858150 | SRR16760277 | L1659 | 2012 | Australia |
| SAMN22858151 | SRR16760276 | L1662 | 2012 | Australia |
| SAMN22858152 | SRR16760275 | L1664 | 2012 | Australia |
| SAMN22858153 | SRR16760274 | L1665 | 2012 | Australia |
| SAMN22858154 | SRR16760272 | L1749 | 2011 | Australia |
| SAMN22858155 | SRR16760271 | L1750 | 2011 | Australia |
| SAMN22858156 | SRR16760270 | L1751 | 2011 | Australia |
| SAMN22858157 | SRR16760269 | L1752 | 2011 | Australia |
| SAMN22858158 | SRR16760384 | L1753 | 2011 | Australia |
| SAMN22858159 | SRR16760373 | L1754 | 2011 | Australia |
| SAMN22858160 | SRR16760362 | L1755 | 2011 | Australia |
| SAMN22858161 | SRR16760351 | L1757 | 2011 | Australia |
| SAMN22858162 | SRR16760264 | L1758 | 2011 | Australia |
| SAMN22858163 | SRR16760263 | L1759 | 2011 | Australia |
| SAMN22858164 | SRR16760261 | L1760 | 2011 | Australia |
| SAMN22858165 | SRR16760260 | L1761 | 2011 | Australia |
| SAMN22858166 | SRR16760259 | L1762 | 2011 | Australia |
| SAMN22858167 | SRR16760258 | L1763 | 2011 | Australia |
| SAMN22858168 | SRR16760257 | L1764 | 2011 | Australia |
| SAMN22858169 | SRR16760256 | L1765 | 2011 | Australia |
| SAMN22858170 | SRR16760255 | L1766 | 2011 | Australia |
| SAMN22858171 | SRR16760254 | L1767 | 2011 | Australia |
| SAMN22858172 | SRR16760253 | L1768 | 2011 | Australia |
| SAMN22858173 | SRR16760252 | L1769 | 2011 | Australia |
| SAMN22858174 | SRR16760250 | L1771 | 2011 | Australia |
| SAMN22858175 | SRR16760249 | L1772 | 2012 | Australia |

|              |             |              |      |           |
|--------------|-------------|--------------|------|-----------|
| SAMN22858176 | SRR16760248 | L1773        | 2012 | Australia |
| SAMN22858177 | SRR16760247 | L1774        | 2012 | Australia |
| SAMN22858178 | SRR16760246 | L1775        | 2012 | Australia |
| SAMN22858179 | SRR16760245 | L1776        | 2012 | Australia |
| SAMN22858180 | SRR16760244 | L1777        | 2012 | Australia |
| SAMN22858181 | SRR16760243 | L1778        | 2012 | Australia |
| SAMN22858182 | SRR16760242 | L1781        | 2012 | Australia |
| SAMN22858183 | SRR16760241 | L1782        | 2012 | Australia |
| SAMN22858184 | SRR16760239 | L1783        | 2012 | Australia |
| SAMN22858185 | SRR16760238 | L1784        | 2012 | Australia |
| SAMN22858186 | SRR16760237 | L1785        | 2012 | Australia |
| SAMN22858188 | SRR16760235 | L1787        | 2012 | Australia |
| SAMN22858190 | SRR16760233 | L1789        | 2012 | Australia |
| SAMN22858193 | SRR16760230 | L1792        | 2012 | Australia |
| SAMN22858194 | SRR16760228 | L1793        | 2012 | Australia |
| SAMN22858195 | SRR16760227 | L1794        | 2012 | Australia |
| SAMN22858196 | SRR16760226 | L1795        | 2012 | Australia |
| SAMN22858197 | SRR16760318 | L1796        | 2012 | Australia |
| SAMN22858198 | SRR16760317 | L1797        | 2012 | Australia |
| SAMN22858199 | SRR16760306 | L1798        | 2012 | Australia |
| SAMN22858200 | SRR16760295 | L900         | 2008 | Australia |
| SAMN24719524 | SRR17522501 | NA           | 2016 | USA       |
| SAMN24719525 | SRR17522498 | NA           | 2016 | USA       |
| SAMN24719540 | SRR16760148 | K973         | 2019 | USA       |
| SAMN24719541 | SRR16760147 | K976         | 2019 | USA       |
| SAMN24719542 | SRR16760201 | NA           | 2020 | USA       |
| SAMN24719544 | SRR16760190 | NA           | 2020 | USA       |
| SAMN27920092 | SRR19028464 | NA           | 1994 | USA       |
| SAMN27920093 | SRR19028463 | NA           | 1998 | USA       |
| SAMN27920094 | SRR19028462 | NA           | 1994 | USA       |
| SAMN27920095 | SRR19028461 | NA           | 1995 | USA       |
| SAMN27920096 | DRR342996   | NA           | 1999 | USA       |
| SAMN27920097 | DRR342997   | NA           | 1999 | USA       |
| SAMN29408379 | SRR21002049 | Bp-510119-20 | NA   | Austria   |
| SAMN29408380 | SRR21002048 | Bp-510122-20 | NA   | Austria   |
| SAMN29408389 | SRR21002055 | Bp-800369-19 | 2019 | Austria   |
| SAMN29408390 | SRR21002054 | Bp-800500-19 | NA   | Austria   |
| SAMN29408393 | SRR23314764 | Bp-800631-19 | 2019 | Austria   |
| SAMN29408398 | SRR21002053 | Bp-801761-19 | 2019 | Austria   |
| SAMN29408399 | SRR21002046 | Bp-801838    | NA   | Austria   |
| SAMN29408400 | SRR21002052 | Bp-801917-19 | 2019 | Austria   |
| SAMN29408403 | SRR21002051 | Bp-802671-19 | 2019 | Austria   |
| SAMN29408411 | SRR21002050 | Bp-806355-18 | 2018 | Austria   |

|              |                 |         |      |              |
|--------------|-----------------|---------|------|--------------|
| SAMN33015657 | SRR26202563     | SA1     | 2015 | South_Africa |
| SAMN33015658 | SRR26202562     | SA2     | 2015 | South_Africa |
| SAMN33015659 | SRR26202551     | SA3     | 2015 | South_Africa |
| SAMN33015660 | SRR26202540     | SA4     | 2015 | South_Africa |
| SAMN33015661 | SRR26202537     | SA5     | 2015 | South_Africa |
| SAMN33015662 | SRR26202536     | SA6     | 2016 | South_Africa |
| SAMN33015663 | SRR26202535     | SA7     | 2015 | South_Africa |
| SAMN33015664 | SRR26202534     | SA8     | 2017 | South_Africa |
| SAMN33015665 | SRR26202533     | SA9     | 2018 | South_Africa |
| SAMN33015666 | SRR26202532     | SA10    | 2018 | South_Africa |
| SAMN33015667 | SRR26202561     | SA11    | 2015 | South_Africa |
| SAMN33015668 | SRR26202560     | SA12    | 2015 | South_Africa |
| SAMN33015669 | SRR26202559     | SA13    | 2015 | South_Africa |
| SAMN33015670 | SRR26202558     | SA14    | 2016 | South_Africa |
| SAMN33015671 | SRR26202557     | SA15    | 2015 | South_Africa |
| SAMN33015672 | SRR26202556     | SA16    | 2018 | South_Africa |
| SAMN33015673 | SRR26202555     | SA17    | 2019 | South_Africa |
| SAMN33015674 | SRR26202554     | SA18    | 2019 | South_Africa |
| SAMN33015675 | SRR26202553     | SA19    | 2019 | South_Africa |
| SAMN33015676 | SRR26202552     | SA20    | 2019 | South_Africa |
| SAMN33015677 | SRR26202550     | SA21    | 2016 | South_Africa |
| SAMN33015678 | SRR26202549     | SA22    | 2015 | South_Africa |
| SAMN33015679 | SRR26202548     | SA23    | 2015 | South_Africa |
| SAMN33015680 | SRR26202547     | SA24    | 2015 | South_Africa |
| SAMN33015681 | SRR26202546     | SA25    | 2015 | South_Africa |
| SAMN33015682 | SRR26202545     | SA26    | 2015 | South_Africa |
| SAMN33015683 | SRR26202544     | SA27    | 2015 | South_Africa |
| SAMN33015684 | SRR26202543     | SA28    | 2015 | South_Africa |
| SAMN33015685 | SRR26202542     | SA29    | 2015 | South_Africa |
| SAMN33015686 | SRR26202541     | SA30    | 2015 | South_Africa |
| SAMN33015687 | SRR26202539     | SA31    | 2015 | South_Africa |
| SAMN33015688 | SRR26202538     | SA32    | 2015 | South_Africa |
| SAMN36430080 | SRR25258334     | D420    | 2023 | USA          |
| SAMN36430081 | SRR25258333     | D420Sm1 | 2023 | USA          |
| SAMN36715056 | GCF_030931755.1 | D420Sm1 | 2022 | USA          |

**Supplementary table 4. Differentially expressed genes.  
MT28 (MR-MT28 and MS-MT28) vs *ptxP3*-other**

| Gene       | Gene_old | log2FoldChange | padj     |
|------------|----------|----------------|----------|
| BP_RS05980 | BP1201   | 3.3            | 2.03E-08 |
| BP_RS11275 | BP2255   | 3              | 2.60E-13 |
| BP_RS14990 | BP2985   | 2.9            | 1.06E-13 |
| BP_RS19050 | BP3785   | 2.8            | 1.50E-07 |
| BP_RS19060 | BP3787   | 2.8            | 1.02E-07 |
| BP_RS11250 | BP2250   | 2.8            | 1.88E-11 |
| BP_RS11280 | BP2256   | 2.7            | 3.32E-12 |
| BP_RS19040 | BP3783   | 2.7            | 1.18E-06 |
| BP_RS19055 | BP3786   | 2.7            | 4.57E-07 |
| BP_RS11570 | BP2315   | 2.7            | 2.42E-06 |
| BP_RS11200 | BP2239   | 2.7            | 5.72E-08 |
| BP_RS19045 | BP3784   | 2.7            | 1.06E-06 |
| BP_RS11315 | BP2263   | 2.6            | 1.34E-08 |
| BP_RS19065 | BP3788   | 2.6            | 4.69E-07 |
| BP_RS17580 | BP3496   | 2.5            | 1.78E-11 |
| BP_RS05975 | BP1200   | 2.5            | 1.40E-05 |
| BP_RS00595 | BP0113   | 2.4            | 1.48E-09 |
| BP_RS10230 | BP2047   | 2.4            | 3.54E-11 |
| BP_RS11255 | BP2251   | 2.4            | 2.03E-08 |
| BP_RS11270 | BP2254   | 2.4            | 2.21E-08 |
| BP_RS18085 | BP3592   | 2.4            | 5.68E-16 |
| BP_RS18545 | BP3683   | 2.4            | 2.85E-05 |
| BP_RS19075 | BP3790   | 2.4            | 9.61E-07 |
| BP_RS04190 | BP0841   | 2.3            | 3.36E-11 |
| BP_RS12700 | BP2533   | 2.3            | 4.23E-11 |
| BP_RS00085 | BP0013   | 2.3            | 3.24E-06 |
| BP_RS14875 | BP2962   | 2.3            | 7.19E-09 |
| BP_RS11220 | BP2244   | 2.3            | 4.43E-05 |
| BP_RS05210 | BP1047   | 2.3            | 2.28E-09 |
| BP_RS17930 | BP3561   | 2.3            | 1.83E-07 |
| BP_RS17575 | BP3495   | 2.3            | 4.19E-07 |
| BP_RS07125 | BP1428   | 2.3            | 1.22E-09 |
| BP_RS16810 | BP3342   | 2.3            | 7.07E-11 |
| BP_RS18575 | BP3689   | 2.3            | 1.04E-09 |
| BP_RS19090 | BP3793   | 2.3            | 6.94E-07 |
| BP_RS17290 | BP3439   | 2.2            | 8.60E-05 |
| BP_RS04195 | BP0842   | 2.2            | 1.48E-09 |
| BP_RS04210 | BP0845   | 2.2            | 8.23E-10 |
| BP_RS00090 | BP0014   | 2.2            | 8.21E-06 |
| BP_RS02485 | BP0492   | 2.2            | 5.50E-06 |

|            |        |     |          |
|------------|--------|-----|----------|
| BP_RS03720 | BP0749 | 2.2 | 3.60E-07 |
| BP_RS14870 | BP2961 | 2.2 | 4.39E-07 |
| BP_RS18165 | BP3608 | 2.2 | 6.18E-07 |
| BP_RS18270 | BP3629 | 2.2 | 1.23E-07 |
| BP_RS18275 | BP3630 | 2.2 | 1.23E-07 |
| BP_RS18295 | BP3634 | 2.2 | 1.73E-07 |
| BP_RS18320 | BP3639 | 2.2 | 1.22E-09 |
| BP_RS18340 | BP3643 | 2.2 | 2.32E-05 |
| BP_RS11320 | BP2264 | 2.2 | 9.21E-08 |
| BP_RS04185 | BP0840 | 2.2 | 1.19E-06 |
| BP_RS04690 | BP0943 | 2.2 | 7.00E-09 |
| BP_RS04890 | BP0984 | 2.2 | 2.43E-05 |
| BP_RS10735 | BP2147 | 2.2 | 6.56E-05 |
| BP_RS14985 | BP2984 | 2.2 | 1.78E-11 |
| BP_RS16815 | BP3343 | 2.2 | 8.52E-10 |
| BP_RS17880 | BP3552 | 2.2 | 4.32E-09 |
| BP_RS11260 | BP2252 | 2.1 | 2.87E-07 |
| BP_RS02525 | BP0500 | 2.1 | 1.34E-04 |
| BP_RS10075 | BP2021 | 2.1 | 5.50E-06 |
| BP_RS16510 | BP3284 | 2.1 | 2.96E-06 |
| BP_RS12935 | BP2576 | 2.1 | 5.48E-08 |
| BP_RS18205 | BP3616 | 2.1 | 1.09E-06 |
| BP_RS18260 | BP3627 | 2.1 | 7.42E-07 |
| BP_RS18265 | BP3628 | 2.1 | 6.45E-07 |
| BP_RS18280 | BP3631 | 2.1 | 6.13E-07 |
| BP_RS18290 | BP3633 | 2.1 | 1.64E-06 |
| BP_RS11175 | BP2234 | 2.1 | 9.90E-06 |
| BP_RS00055 | BP0007 | 2.1 | 2.63E-06 |
| BP_RS18175 | BP3610 | 2.1 | 2.76E-06 |
| BP_RS18180 | BP3611 | 2.1 | 7.07E-06 |
| BP_RS12180 | BP2434 | 2.1 | 3.75E-10 |
| BP_RS04445 | BP0893 | 2.1 | 1.18E-14 |
| BP_RS07425 | BP1487 | 2.1 | 5.05E-05 |
| BP_RS10910 | BP2183 | 2.1 | 2.20E-05 |
| BP_RS11945 | BP2387 | 2.1 | 3.05E-08 |
| BP_RS14685 | BP2924 | 2.1 | 2.44E-04 |
| BP_RS17120 | BP3405 | 2.1 | 3.32E-04 |
| BP_RS19070 | BP3789 | 2.1 | 5.60E-05 |
| BP_RS19095 | BP3794 | 2.1 | 2.07E-06 |
| BP_RS19105 | BP3796 | 2.1 | 1.70E-06 |
| BP_RS05605 | BP1126 | 2   | 1.42E-08 |
| BP_RS12735 | BP2540 | 2   | 9.91E-06 |
| BP_RS04200 | BP0843 | 2   | 1.29E-08 |

|            |        |     |          |
|------------|--------|-----|----------|
| BP_RS04205 | BP0844 | 2   | 5.00E-08 |
| BP_RS04215 | BP0846 | 2   | 1.14E-07 |
| BP_RS04240 | BP0851 | 2   | 8.41E-07 |
| BP_RS16505 | BP3283 | 2   | 5.47E-05 |
| BP_RS16515 | BP3285 | 2   | 6.30E-05 |
| BP_RS16525 | BP3287 | 2   | 3.19E-05 |
| BP_RS11825 | BP2362 | 2   | 2.45E-06 |
| BP_RS11830 | BP2363 | 2   | 1.64E-06 |
| BP_RS04850 | BP0975 | 2   | 4.14E-06 |
| BP_RS10250 | BP2051 | 2   | 1.44E-08 |
| BP_RS14020 | BP2794 | 2   | 2.88E-06 |
| BP_RS18185 | BP3612 | 2   | 2.11E-04 |
| BP_RS18190 | BP3613 | 2   | 5.53E-06 |
| BP_RS18200 | BP3615 | 2   | 3.95E-05 |
| BP_RS18210 | BP3617 | 2   | 9.87E-06 |
| BP_RS18215 | BP3618 | 2   | 1.50E-05 |
| BP_RS18255 | BP3626 | 2   | 2.97E-06 |
| BP_RS18315 | BP3638 | 2   | 1.21E-05 |
| BP_RS12235 | BP2445 | 2   | 4.67E-06 |
| BP_RS10020 | BP2010 | 2   | 2.07E-06 |
| BP_RS18310 | BP3637 | 2   | 2.24E-05 |
| BP_RS15515 | BP3085 | 2   | 2.09E-09 |
| BP_RS03025 | BP0604 | 2   | 4.51E-07 |
| BP_RS02690 | BP0535 | 2   | 7.80E-05 |
| BP_RS03940 | BP0792 | 2   | 4.55E-07 |
| BP_RS11810 | BP2359 | 2   | 3.62E-07 |
| BP_RS12205 | BP2439 | 2   | 3.47E-07 |
| BP_RS12210 | BP2440 | 2   | 9.17E-07 |
| BP_RS12505 | BP2497 | 2   | 9.52E-07 |
| BP_RS14605 | BP2908 | 2   | 3.99E-06 |
| BP_RS14700 | BP2927 | 2   | 6.01E-04 |
| BP_RS15150 | BP3018 | 2   | 1.63E-06 |
| BP_RS17765 | BP3530 | 2   | 7.58E-07 |
| BP_RS11805 | BP2358 | 1.9 | 1.18E-06 |
| BP_RS04225 | BP0848 | 1.9 | 2.73E-06 |
| BP_RS04230 | BP0849 | 1.9 | 2.70E-06 |
| BP_RS04245 | BP0852 | 1.9 | 6.36E-07 |
| BP_RS04250 | BP0853 | 1.9 | 1.08E-06 |
| BP_RS16520 | BP3286 | 1.9 | 2.85E-05 |
| BP_RS03955 | BP0794 | 1.9 | 1.78E-05 |
| BP_RS07080 | BP1419 | 1.9 | 6.34E-06 |
| BP_RS10935 | BP2186 | 1.9 | 1.44E-05 |
| BP_RS14015 | BP2793 | 1.9 | 1.78E-05 |

|            |        |     |          |
|------------|--------|-----|----------|
| BP_RS18170 | BP3609 | 1.9 | 9.74E-06 |
| BP_RS18195 | BP3614 | 1.9 | 1.08E-04 |
| BP_RS18220 | BP3619 | 1.9 | 5.45E-05 |
| BP_RS18230 | BP3621 | 1.9 | 5.72E-05 |
| BP_RS18285 | BP3632 | 1.9 | 2.65E-06 |
| BP_RS18325 | BP3640 | 1.9 | 1.30E-05 |
| BP_RS14030 | BP2796 | 1.9 | 3.99E-06 |
| BP_RS07095 | BP1422 | 1.9 | 1.17E-06 |
| BP_RS01400 | BP0274 | 1.9 | 2.52E-07 |
| BP_RS18335 | BP3642 | 1.9 | 1.22E-04 |
| BP_RS07120 | BP1427 | 1.9 | 1.63E-06 |
| BP_RS19085 | BP3792 | 1.9 | 6.40E-06 |
| BP_RS00065 | BP0008 | 1.9 | 1.17E-05 |
| BP_RS18305 | BP3636 | 1.9 | 8.48E-05 |
| BP_RS19010 | BP3777 | 1.9 | 3.53E-07 |
| BP_RS09385 | BP1883 | 1.9 | 2.26E-04 |
| BP_RS01925 | BP0380 | 1.9 | 7.01E-06 |
| BP_RS04795 | BP0965 | 1.9 | 2.02E-04 |
| BP_RS04895 | BP0985 | 1.9 | 5.65E-05 |
| BP_RS05705 | BP1146 | 1.9 | 6.35E-09 |
| BP_RS07135 | BP1430 | 1.9 | 1.09E-06 |
| BP_RS08070 | BP1616 | 1.9 | 2.10E-05 |
| BP_RS10960 | BP2191 | 1.9 | 1.42E-08 |
| BP_RS11170 | BP2233 | 1.9 | 1.40E-05 |
| BP_RS13985 | BP2787 | 1.9 | 5.95E-08 |
| BP_RS16235 | BP3228 | 1.9 | 5.68E-06 |
| BP_RS16825 | BP3345 | 1.9 | 3.01E-07 |
| BP_RS18925 | BP3759 | 1.9 | 1.48E-06 |
| BP_RS19465 | BP3867 | 1.9 | 6.34E-04 |
| BP_RS17570 | BP3494 | 1.8 | 1.52E-03 |
| BP_RS04970 | BP1000 | 1.8 | 3.50E-05 |
| BP_RS05595 | BP1124 | 1.8 | 5.55E-07 |
| BP_RS05600 | BP1125 | 1.8 | 1.59E-06 |
| BP_RS12740 | BP2541 | 1.8 | 2.27E-05 |
| BP_RS01335 | BP0261 | 1.8 | 4.34E-04 |
| BP_RS04235 | BP0850 | 1.8 | 3.99E-06 |
| BP_RS04255 | BP0854 | 1.8 | 5.69E-06 |
| BP_RS11815 | BP2360 | 1.8 | 1.09E-06 |
| BP_RS00075 | BP0010 | 1.8 | 1.78E-05 |
| BP_RS03715 | BP0748 | 1.8 | 2.74E-04 |
| BP_RS06135 | BP1232 | 1.8 | 3.54E-04 |
| BP_RS12930 | BP2575 | 1.8 | 1.09E-04 |
| BP_RS15710 | BP3124 | 1.8 | 4.41E-05 |

|            |        |     |          |
|------------|--------|-----|----------|
| BP_RS18225 | BP3620 | 1.8 | 3.01E-04 |
| BP_RS18235 | BP3622 | 1.8 | 9.68E-04 |
| BP_RS18300 | BP3635 | 1.8 | 6.46E-05 |
| BP_RS18330 | BP3641 | 1.8 | 6.92E-05 |
| BP_RS10970 | BP2193 | 1.8 | 8.62E-06 |
| BP_RS06225 | BP1246 | 1.8 | 4.33E-07 |
| BP_RS12195 | BP2437 | 1.8 | 3.57E-06 |
| BP_RS07085 | BP1420 | 1.8 | 5.93E-06 |
| BP_RS15130 | BP3014 | 1.8 | 3.62E-07 |
| BP_RS09495 | BP1906 | 1.8 | 1.45E-06 |
| BP_RS09390 | BP1884 | 1.8 | 4.93E-04 |
| BP_RS00900 | BP0174 | 1.8 | 9.14E-06 |
| BP_RS04925 | BP0991 | 1.8 | 5.55E-07 |
| BP_RS05915 | BP1189 | 1.8 | 4.37E-05 |
| BP_RS06255 | BP1252 | 1.8 | 4.34E-04 |
| BP_RS06400 | BP1281 | 1.8 | 8.84E-06 |
| BP_RS07090 | BP1421 | 1.8 | 1.10E-05 |
| BP_RS07755 | BP1550 | 1.8 | 1.90E-06 |
| BP_RS07865 | BP1573 | 1.8 | 9.09E-05 |
| BP_RS08760 | BP1758 | 1.8 | 4.19E-07 |
| BP_RS08825 | BP1770 | 1.8 | 9.17E-05 |
| BP_RS09375 | BP1881 | 1.8 | 1.64E-03 |
| BP_RS10955 | BP2190 | 1.8 | 1.09E-06 |
| BP_RS11095 | BP2219 | 1.8 | 3.12E-05 |
| BP_RS12130 | BP2424 | 1.8 | 4.27E-05 |
| BP_RS12695 | BP2532 | 1.8 | 1.07E-05 |
| BP_RS13785 | BP2747 | 1.8 | 9.40E-06 |
| BP_RS13855 | BP2761 | 1.8 | 2.57E-05 |
| BP_RS13990 | BP2788 | 1.8 | 7.01E-07 |
| BP_RS14025 | BP2795 | 1.8 | 4.84E-06 |
| BP_RS15020 | BP2992 | 1.8 | 5.65E-07 |
| BP_RS15240 | BP3037 | 1.8 | 5.51E-06 |
| BP_RS15510 | BP3084 | 1.8 | 5.06E-07 |
| BP_RS17895 | BP3554 | 1.8 | 4.33E-06 |
| BP_RS17935 | BP3562 | 1.8 | 5.83E-08 |
| BP_RS17940 | BP3563 | 1.8 | 9.87E-08 |
| BP_RS18000 | BP3575 | 1.8 | 1.04E-03 |
| BP_RS18935 | BP3761 | 1.8 | 6.40E-06 |
| BP_RS09360 | BP1878 | 1.7 | 1.20E-04 |
| BP_RS03785 | BP0760 | 1.7 | 2.59E-04 |
| BP_RS01920 | BP0379 | 1.7 | 8.52E-06 |
| BP_RS16530 | BP3288 | 1.7 | 2.75E-04 |
| BP_RS16500 | BP3282 | 1.7 | 2.00E-04 |



|            |        |     |          |
|------------|--------|-----|----------|
| BP_RS04725 | BP0950 | 1.7 | 1.07E-04 |
| BP_RS13915 | BP2773 | 1.7 | 2.85E-04 |
| BP_RS09180 | BP1839 | 1.7 | 1.16E-04 |
| BP_RS11940 | BP2386 | 1.7 | 1.49E-05 |
| BP_RS00070 | BP0009 | 1.7 | 3.92E-05 |
| BP_RS00095 | BP0015 | 1.7 | 2.31E-05 |
| BP_RS00100 | BP0016 | 1.7 | 4.67E-05 |
| BP_RS07885 | BP1577 | 1.7 | 5.14E-05 |
| BP_RS12190 | BP2436 | 1.7 | 2.58E-06 |
| BP_RS06305 | BP1262 | 1.7 | 7.23E-06 |
| BP_RS03030 | BP0605 | 1.7 | 3.20E-07 |
| BP_RS06310 | BP1263 | 1.7 | 2.22E-06 |
| BP_RS03410 | BP0680 | 1.7 | 4.31E-05 |
| BP_RS01010 | BP0196 | 1.7 | 3.19E-05 |
| BP_RS01055 | BP0205 | 1.7 | 1.45E-06 |
| BP_RS02160 | BP0426 | 1.7 | 6.85E-06 |
| BP_RS02445 | BP0484 | 1.7 | 4.09E-05 |
| BP_RS02520 | BP0499 | 1.7 | 4.07E-03 |
| BP_RS04105 | BP0824 | 1.7 | 4.70E-06 |
| BP_RS04265 | BP0856 | 1.7 | 2.71E-03 |
| BP_RS04905 | BP0987 | 1.7 | 9.95E-05 |
| BP_RS05335 | BP1071 | 1.7 | 9.74E-06 |
| BP_RS05725 | BP1150 | 1.7 | 1.78E-05 |
| BP_RS05735 | BP1152 | 1.7 | 2.03E-07 |
| BP_RS07055 | BP1415 | 1.7 | 7.18E-07 |
| BP_RS07185 | BP1440 | 1.7 | 1.80E-04 |
| BP_RS08850 | BP1775 | 1.7 | 2.31E-05 |
| BP_RS08860 | BP1777 | 1.7 | 4.55E-07 |
| BP_RS09075 | BP1819 | 1.7 | 6.82E-06 |
| BP_RS11015 | BP2202 | 1.7 | 2.94E-05 |
| BP_RS12175 | BP2433 | 1.7 | 2.52E-06 |
| BP_RS12560 | BP2508 | 1.7 | 3.24E-05 |
| BP_RS12725 | BP2538 | 1.7 | 2.11E-05 |
| BP_RS12780 | BP2549 | 1.7 | 1.07E-05 |
| BP_RS12855 | BP2564 | 1.7 | 1.23E-07 |
| BP_RS13750 | BP2738 | 1.7 | 2.94E-03 |
| BP_RS14510 | BP2889 | 1.7 | 7.08E-06 |
| BP_RS14620 | BP2911 | 1.7 | 3.29E-04 |
| BP_RS14690 | BP2925 | 1.7 | 5.19E-03 |
| BP_RS14825 | BP2952 | 1.7 | 4.70E-06 |
| BP_RS14855 | BP2958 | 1.7 | 4.14E-06 |
| BP_RS14980 | BP2983 | 1.7 | 5.55E-07 |
| BP_RS15425 | BP3068 | 1.7 | 1.25E-04 |

|            |        |     |          |
|------------|--------|-----|----------|
| BP_RS15845 | BP3150 | 1.7 | 2.52E-07 |
| BP_RS16240 | BP3229 | 1.7 | 2.77E-05 |
| BP_RS16395 | BP3261 | 1.7 | 3.34E-06 |
| BP_RS16400 | BP3262 | 1.7 | 6.18E-07 |
| BP_RS16830 | BP3346 | 1.7 | 1.42E-08 |
| BP_RS18045 | BP3584 | 1.7 | 1.94E-05 |
| BP_RS11265 | BP2253 | 1.6 | 5.01E-05 |
| BP_RS10040 | BP2014 | 1.6 | 8.89E-05 |
| BP_RS01325 | BP0259 | 1.6 | 3.73E-06 |
| BP_RS01405 | BP0275 | 1.6 | 6.14E-05 |
| BP_RS04220 | BP0847 | 1.6 | 4.76E-05 |
| BP_RS11820 | BP2361 | 1.6 | 8.70E-05 |
| BP_RS07165 | BP1436 | 1.6 | 2.69E-06 |
| BP_RS00080 | BP0011 | 1.6 | 1.08E-04 |
| BP_RS05065 | BP1019 | 1.6 | 4.34E-06 |
| BP_RS03960 | BP0795 | 1.6 | 5.22E-04 |
| BP_RS12185 | BP2435 | 1.6 | 5.02E-06 |
| BP_RS12160 | BP2430 | 1.6 | 9.74E-06 |
| BP_RS05200 | BP1045 | 1.6 | 3.05E-05 |
| BP_RS05365 | BP1077 | 1.6 | 3.85E-05 |
| BP_RS13815 | BP2753 | 1.6 | 4.93E-05 |
| BP_RS12515 | BP2499 | 1.6 | 7.38E-06 |
| BP_RS09380 | BP1882 | 1.6 | 5.72E-03 |
| BP_RS00015 | BP0003 | 1.6 | 4.51E-07 |
| BP_RS00955 | BP0185 | 1.6 | 5.53E-06 |
| BP_RS02080 | BP0410 | 1.6 | 5.17E-05 |
| BP_RS04260 | BP0855 | 1.6 | 9.00E-05 |
| BP_RS04655 | BP0937 | 1.6 | 1.52E-05 |
| BP_RS04780 | BP0961 | 1.6 | 2.20E-05 |
| BP_RS05260 | BP1057 | 1.6 | 4.01E-05 |
| BP_RS05415 | BP1087 | 1.6 | 1.74E-04 |
| BP_RS05730 | BP1151 | 1.6 | 2.86E-05 |
| BP_RS05845 | BP1175 | 1.6 | 1.54E-04 |
| BP_RS06120 | BP1229 | 1.6 | 2.75E-04 |
| BP_RS07140 | BP1431 | 1.6 | 1.21E-05 |
| BP_RS07195 | BP1442 | 1.6 | 8.12E-06 |
| BP_RS07250 | BP1453 | 1.6 | 3.73E-06 |
| BP_RS07970 | BP1596 | 1.6 | 9.37E-06 |
| BP_RS08040 | BP1610 | 1.6 | 6.94E-03 |
| BP_RS08805 | BP1766 | 1.6 | 9.57E-04 |
| BP_RS08845 | BP1774 | 1.6 | 6.00E-05 |
| BP_RS09265 | BP1857 | 1.6 | 1.94E-03 |
| BP_RS10260 | BP2053 | 1.6 | 1.40E-05 |

|            |        |     |          |
|------------|--------|-----|----------|
| BP_RS10350 | BP2072 | 1.6 | 1.26E-05 |
| BP_RS11245 | BP2249 | 1.6 | 4.14E-04 |
| BP_RS11410 | BP2282 | 1.6 | 1.90E-06 |
| BP_RS11900 | BP2378 | 1.6 | 3.44E-05 |
| BP_RS12230 | BP2444 | 1.6 | 1.24E-04 |
| BP_RS12745 | BP2542 | 1.6 | 1.84E-04 |
| BP_RS14865 | BP2960 | 1.6 | 3.99E-06 |
| BP_RS15145 | BP3017 | 1.6 | 1.63E-04 |
| BP_RS15155 | BP3019 | 1.6 | 9.52E-07 |
| BP_RS15245 | BP3038 | 1.6 | 1.81E-04 |
| BP_RS16495 | BP3281 | 1.6 | 5.25E-04 |
| BP_RS16805 | BP3341 | 1.6 | 3.62E-07 |
| BP_RS17050 | BP3391 | 1.6 | 1.74E-05 |
| BP_RS17525 | BP3485 | 1.6 | 3.99E-06 |
| BP_RS19000 | BP3775 | 1.6 | 1.41E-05 |
| BP_RS19005 | BP3776 | 1.6 | 9.22E-06 |
| BP_RS09365 | BP1879 | 1.5 | 4.90E-03 |
| BP_RS04330 | BP0868 | 1.5 | 9.93E-05 |
| BP_RS11840 | BP2365 | 1.5 | 7.91E-04 |
| BP_RS12460 | BP2488 | 1.5 | 1.70E-04 |
| BP_RS14720 | BP2931 | 1.5 | 1.45E-03 |
| BP_RS14725 | BP2932 | 1.5 | 6.62E-04 |
| BP_RS16535 | BP3289 | 1.5 | 6.09E-03 |
| BP_RS18080 | BP3591 | 1.5 | 6.14E-05 |
| BP_RS17745 | BP3526 | 1.5 | 1.70E-06 |
| BP_RS10920 | BP2184 | 1.5 | 7.27E-05 |
| BP_RS03550 | BP0709 | 1.5 | 8.84E-06 |
| BP_RS11190 | BP2237 | 1.5 | 2.00E-03 |
| BP_RS08855 | BP1776 | 1.5 | 1.81E-05 |
| BP_RS09370 | BP1880 | 1.5 | 6.29E-04 |
| BP_RS00540 | BP0102 | 1.5 | 1.44E-05 |
| BP_RS00560 | BP0106 | 1.5 | 1.09E-04 |
| BP_RS01865 | BP0368 | 1.5 | 1.12E-03 |
| BP_RS02315 | BP0457 | 1.5 | 5.74E-05 |
| BP_RS02420 | BP0479 | 1.5 | 1.71E-05 |
| BP_RS02475 | BP0490 | 1.5 | 2.45E-05 |
| BP_RS03325 | BP0664 | 1.5 | 7.12E-05 |
| BP_RS04730 | BP0951 | 1.5 | 2.59E-03 |
| BP_RS04750 | BP0955 | 1.5 | 7.23E-06 |
| BP_RS05170 | BP1038 | 1.5 | 5.49E-06 |
| BP_RS05235 | BP1052 | 1.5 | 4.18E-05 |
| BP_RS06235 | BP1248 | 1.5 | 1.36E-05 |
| BP_RS06260 | BP1253 | 1.5 | 3.00E-07 |

|            |        |     |          |
|------------|--------|-----|----------|
| BP_RS06290 | BP1259 | 1.5 | 2.54E-04 |
| BP_RS07130 | BP1429 | 1.5 | 2.68E-05 |
| BP_RS07245 | BP1452 | 1.5 | 4.18E-06 |
| BP_RS07390 | BP1480 | 1.5 | 3.52E-04 |
| BP_RS07400 | BP1482 | 1.5 | 2.01E-03 |
| BP_RS07480 | BP1497 | 1.5 | 4.66E-06 |
| BP_RS07515 | BP1504 | 1.5 | 3.73E-05 |
| BP_RS07845 | BP1569 | 1.5 | 1.08E-04 |
| BP_RS08015 | BP1605 | 1.5 | 6.01E-04 |
| BP_RS08500 | BP1706 | 1.5 | 8.14E-03 |
| BP_RS09530 | BP1913 | 1.5 | 3.88E-04 |
| BP_RS10325 | BP2067 | 1.5 | 8.55E-05 |
| BP_RS10370 | BP2076 | 1.5 | 6.10E-05 |
| BP_RS10985 | BP2196 | 1.5 | 6.07E-05 |
| BP_RS11650 | BP2326 | 1.5 | 3.73E-06 |
| BP_RS12015 | BP2401 | 1.5 | 4.56E-05 |
| BP_RS12475 | BP2491 | 1.5 | 3.01E-07 |
| BP_RS12555 | BP2507 | 1.5 | 1.78E-04 |
| BP_RS12765 | BP2546 | 1.5 | 4.45E-04 |
| BP_RS12970 | BP2583 | 1.5 | 6.15E-06 |
| BP_RS13180 | BP2624 | 1.5 | 3.38E-05 |
| BP_RS13185 | BP2625 | 1.5 | 3.62E-05 |
| BP_RS13315 | BP2652 | 1.5 | 2.09E-05 |
| BP_RS13425 | BP2674 | 1.5 | 7.36E-04 |
| BP_RS13555 | BP2699 | 1.5 | 3.95E-05 |
| BP_RS13635 | BP2715 | 1.5 | 3.29E-04 |
| BP_RS13805 | BP2751 | 1.5 | 2.03E-08 |
| BP_RS14555 | BP2898 | 1.5 | 3.38E-05 |
| BP_RS14880 | BP2963 | 1.5 | 9.04E-05 |
| BP_RS15420 | BP3067 | 1.5 | 1.11E-03 |
| BP_RS15530 | BP3088 | 1.5 | 6.02E-05 |
| BP_RS15715 | BP3125 | 1.5 | 6.14E-05 |
| BP_RS17095 | BP3400 | 1.5 | 3.25E-04 |
| BP_RS17300 | BP3441 | 1.5 | 4.67E-03 |
| BP_RS17460 | BP3471 | 1.5 | 2.98E-05 |
| BP_RS18025 | BP3580 | 1.5 | 2.63E-06 |
| BP_RS18245 | BP3624 | 1.5 | 2.09E-05 |
| BP_RS18840 | BP3741 | 1.5 | 8.19E-04 |
| BP_RS18950 | BP3765 | 1.5 | 2.92E-06 |
| BP_RS19235 | BP3821 | 1.5 | 2.49E-04 |
| BP_RS19390 | BP3852 | 1.5 | 3.64E-04 |
| BP_RS20060 |        | 1.5 | 3.21E-03 |
| BP_RS20095 |        | 1.5 | 2.65E-04 |

|            |         |     |          |
|------------|---------|-----|----------|
| BP_RS20225 |         | 1.5 | 4.03E-05 |
| BP_RS03870 | BP0777  | 1.4 | 2.34E-03 |
| BP_RS04935 | BP0993  | 1.4 | 5.93E-04 |
| BP_RS01415 | BP0277  | 1.4 | 3.13E-04 |
| BP_RS14715 | BP2930  | 1.4 | 1.68E-03 |
| BP_RS18835 | BP3740  | 1.4 | 2.95E-03 |
| BP_RS18850 | BP3744  | 1.4 | 2.31E-03 |
| BP_RS15045 | BP2997  | 1.4 | 3.68E-04 |
| BP_RS12055 | BP2409  | 1.4 | 1.16E-04 |
| BP_RS05500 | BP1104  | 1.4 | 2.12E-04 |
| BP_RS08975 | BP1799  | 1.4 | 3.67E-04 |
| BP_RS07485 | BP1498  | 1.4 | 3.15E-03 |
| BP_RS11195 | BP2238  | 1.4 | 3.56E-03 |
| BP_RS05205 | BP1046  | 1.4 | 2.21E-05 |
| BP_RS00210 | BP0038  | 1.4 | 3.42E-04 |
| BP_RS00545 | BP0103  | 1.4 | 9.67E-05 |
| BP_RS00550 | BP0104  | 1.4 | 2.54E-04 |
| BP_RS00980 | BP0190  | 1.4 | 1.00E-04 |
| BP_RS01165 | BP0227  | 1.4 | 1.42E-05 |
| BP_RS01280 | BP0250  | 1.4 | 2.11E-03 |
| BP_RS01420 | BP0278  | 1.4 | 1.59E-04 |
| BP_RS01950 | BP0386  | 1.4 | 4.47E-05 |
| BP_RS01955 | BP0387  | 1.4 | 2.00E-05 |
| BP_RS02605 | BP0516  | 1.4 | 4.52E-05 |
| BP_RS02875 | BP0572  | 1.4 | 4.91E-04 |
| BP_RS03050 | BP0609  | 1.4 | 1.05E-04 |
| BP_RS03335 | BP0666  | 1.4 | 7.77E-04 |
| BP_RS03935 | BP0791  | 1.4 | 2.71E-05 |
| BP_RS03990 | BP0800  | 1.4 | 6.40E-06 |
| BP_RS05320 | BP1068  | 1.4 | 1.35E-07 |
| BP_RS07075 | BP1418  | 1.4 | 8.38E-05 |
| BP_RS07160 | BP1435  | 1.4 | 1.31E-04 |
| BP_RS07410 | BP1484  | 1.4 | 2.77E-04 |
| BP_RS07430 | BP1488  | 1.4 | 2.82E-03 |
| BP_RS08045 | BP1611  | 1.4 | 2.11E-03 |
| BP_RS08120 | BP1629  | 1.4 | 6.21E-05 |
| BP_RS08445 | BP1695  | 1.4 | 8.82E-06 |
| BP_RS08790 | BP1764  | 1.4 | 2.68E-04 |
| BP_RS08965 | BP1797  | 1.4 | 3.07E-03 |
| BP_RS10625 | BP2125A | 1.4 | 8.31E-04 |
| BP_RS10980 | BP2195  | 1.4 | 1.94E-04 |
| BP_RS11065 | BP2213  | 1.4 | 2.04E-04 |
| BP_RS11215 | BP2243  | 1.4 | 7.38E-03 |

|            |        |     |          |
|------------|--------|-----|----------|
| BP_RS11535 | BP2308 | 1.4 | 9.17E-05 |
| BP_RS11555 | BP2312 | 1.4 | 1.28E-04 |
| BP_RS11665 | BP2329 | 1.4 | 3.02E-05 |
| BP_RS11710 | BP2338 | 1.4 | 1.08E-07 |
| BP_RS11950 | BP2388 | 1.4 | 1.19E-04 |
| BP_RS11955 | BP2389 | 1.4 | 2.12E-04 |
| BP_RS12215 | BP2441 | 1.4 | 1.81E-05 |
| BP_RS12355 | BP2468 | 1.4 | 2.19E-03 |
| BP_RS12385 | BP2474 | 1.4 | 6.83E-05 |
| BP_RS12840 | BP2561 | 1.4 | 4.34E-04 |
| BP_RS12860 | BP2565 | 1.4 | 1.44E-04 |
| BP_RS13775 | BP2745 | 1.4 | 2.75E-04 |
| BP_RS13975 | BP2785 | 1.4 | 1.90E-03 |
| BP_RS14035 | BP2797 | 1.4 | 4.56E-05 |
| BP_RS14115 | BP2813 | 1.4 | 3.99E-06 |
| BP_RS14640 | BP2915 | 1.4 | 6.30E-04 |
| BP_RS14645 | BP2916 | 1.4 | 2.09E-05 |
| BP_RS14745 | BP2936 | 1.4 | 5.72E-03 |
| BP_RS14830 | BP2953 | 1.4 | 6.03E-04 |
| BP_RS15215 | BP3031 | 1.4 | 2.42E-05 |
| BP_RS15695 | BP3121 | 1.4 | 2.74E-05 |
| BP_RS16260 | BP3233 | 1.4 | 3.02E-04 |
| BP_RS16405 | BP3263 | 1.4 | 2.94E-05 |
| BP_RS16410 | BP3264 | 1.4 | 8.67E-05 |
| BP_RS16705 | BP3322 | 1.4 | 2.00E-03 |
| BP_RS17995 | BP3574 | 1.4 | 6.22E-03 |
| BP_RS18005 | BP3576 | 1.4 | 3.43E-03 |
| BP_RS18010 | BP3577 | 1.4 | 5.83E-03 |
| BP_RS18035 | BP3582 | 1.4 | 1.75E-06 |
| BP_RS18375 | BP3650 | 1.4 | 1.10E-03 |
| BP_RS18535 | BP3681 | 1.4 | 1.07E-04 |
| BP_RS18580 | BP3690 | 1.4 | 5.51E-04 |
| BP_RS18790 | BP3731 | 1.4 | 5.20E-05 |
| BP_RS18975 | BP3770 | 1.4 | 2.18E-04 |
| BP_RS19080 | BP3791 | 1.4 | 4.41E-03 |
| BP_RS19225 | BP3819 | 1.4 | 3.54E-04 |
| BP_RS19270 | BP3828 | 1.4 | 6.01E-04 |
| BP_RS19980 | BP3742 | 1.4 | 8.51E-03 |
| BP_RS11285 | BP2257 | 1.3 | 3.45E-04 |
| BP_RS09355 | BP1877 | 1.3 | 2.17E-03 |
| BP_RS07590 | BP1519 | 1.3 | 1.89E-03 |
| BP_RS04940 | BP0994 | 1.3 | 8.00E-04 |
| BP_RS04945 | BP0995 | 1.3 | 1.89E-03 |

|            |        |     |          |
|------------|--------|-----|----------|
| BP_RS18845 | BP3743 | 1.3 | 8.35E-03 |
| BP_RS01410 | BP0276 | 1.3 | 1.68E-03 |
| BP_RS15040 | BP2996 | 1.3 | 1.17E-03 |
| BP_RS11895 | BP2377 | 1.3 | 1.81E-04 |
| BP_RS10245 | BP2050 | 1.3 | 2.91E-03 |
| BP_RS16845 | BP3349 | 1.3 | 3.32E-04 |
| BP_RS18440 | BP3662 | 1.3 | 1.22E-03 |
| BP_RS02500 | BP0495 | 1.3 | 2.41E-04 |
| BP_RS02825 | BP0562 | 1.3 | 6.45E-03 |
| BP_RS16745 | BP3330 | 1.3 | 1.89E-04 |
| BP_RS01260 | BP0246 | 1.3 | 1.71E-03 |
| BP_RS01265 | BP0247 | 1.3 | 2.76E-04 |
| BP_RS01895 | BP0374 | 1.3 | 1.46E-03 |
| BP_RS02300 | BP0454 | 1.3 | 7.81E-04 |
| BP_RS02330 | BP0460 | 1.3 | 2.70E-04 |
| BP_RS02400 | BP0474 | 1.3 | 1.12E-05 |
| BP_RS02470 | BP0489 | 1.3 | 5.08E-04 |
| BP_RS02550 | BP0506 | 1.3 | 1.97E-04 |
| BP_RS02555 | BP0507 | 1.3 | 4.24E-04 |
| BP_RS02880 | BP0573 | 1.3 | 4.38E-04 |
| BP_RS04140 | BP0831 | 1.3 | 1.47E-05 |
| BP_RS04440 | BP0892 | 1.3 | 8.76E-04 |
| BP_RS04510 | BP0906 | 1.3 | 9.00E-04 |
| BP_RS04695 | BP0944 | 1.3 | 1.02E-04 |
| BP_RS05255 | BP1056 | 1.3 | 5.22E-04 |
| BP_RS05355 | BP1075 | 1.3 | 3.98E-05 |
| BP_RS06360 | BP1273 | 1.3 | 3.67E-04 |
| BP_RS06365 | BP1274 | 1.3 | 4.79E-04 |
| BP_RS06520 | BP1305 | 1.3 | 8.53E-05 |
| BP_RS07395 | BP1481 | 1.3 | 3.44E-03 |
| BP_RS07680 | BP1537 | 1.3 | 8.02E-05 |
| BP_RS07850 | BP1570 | 1.3 | 8.58E-04 |
| BP_RS07870 | BP1574 | 1.3 | 1.45E-03 |
| BP_RS08510 | BP1708 | 1.3 | 2.24E-03 |
| BP_RS08535 | BP1713 | 1.3 | 2.07E-04 |
| BP_RS08575 | BP1721 | 1.3 | 2.83E-04 |
| BP_RS08580 | BP1722 | 1.3 | 2.69E-04 |
| BP_RS08765 | BP1759 | 1.3 | 6.98E-04 |
| BP_RS08985 | BP1801 | 1.3 | 4.66E-03 |
| BP_RS09165 | BP1836 | 1.3 | 3.16E-04 |
| BP_RS09405 | BP1887 | 1.3 | 1.77E-03 |
| BP_RS10270 | BP2055 | 1.3 | 2.94E-03 |
| BP_RS10365 | BP2075 | 1.3 | 1.90E-04 |

|            |        |     |          |
|------------|--------|-----|----------|
| BP_RS10500 | BP2102 | 1.3 | 3.29E-05 |
| BP_RS10595 | BP2120 | 1.3 | 7.54E-04 |
| BP_RS10940 | BP2187 | 1.3 | 3.79E-04 |
| BP_RS11160 | BP2232 | 1.3 | 1.17E-03 |
| BP_RS11460 | BP2293 | 1.3 | 5.66E-03 |
| BP_RS11700 | BP2336 | 1.3 | 5.45E-03 |
| BP_RS11760 | BP2348 | 1.3 | 5.57E-04 |
| BP_RS11990 | BP2396 | 1.3 | 6.67E-03 |
| BP_RS12010 | BP2400 | 1.3 | 3.69E-04 |
| BP_RS12750 | BP2543 | 1.3 | 8.95E-04 |
| BP_RS12910 | BP2571 | 1.3 | 3.97E-04 |
| BP_RS12915 | BP2572 | 1.3 | 3.13E-04 |
| BP_RS12960 | BP2581 | 1.3 | 1.21E-03 |
| BP_RS13795 | BP2749 | 1.3 | 7.16E-03 |
| BP_RS13895 | BP2769 | 1.3 | 1.11E-03 |
| BP_RS13900 | BP2770 | 1.3 | 6.22E-04 |
| BP_RS14530 | BP2893 | 1.3 | 6.84E-04 |
| BP_RS14535 | BP2894 | 1.3 | 6.84E-04 |
| BP_RS14550 | BP2897 | 1.3 | 5.19E-04 |
| BP_RS14595 | BP2906 | 1.3 | 3.25E-04 |
| BP_RS14820 | BP2951 | 1.3 | 3.57E-04 |
| BP_RS14995 | BP2986 | 1.3 | 2.90E-04 |
| BP_RS15025 | BP2993 | 1.3 | 9.38E-06 |
| BP_RS15520 | BP3086 | 1.3 | 9.32E-06 |
| BP_RS15745 | BP3130 | 1.3 | 1.89E-03 |
| BP_RS15775 | BP3136 | 1.3 | 5.64E-05 |
| BP_RS16180 | BP3217 | 1.3 | 1.63E-04 |
| BP_RS16185 | BP3218 | 1.3 | 5.04E-03 |
| BP_RS16255 | BP3232 | 1.3 | 2.87E-04 |
| BP_RS16285 | BP3238 | 1.3 | 1.04E-03 |
| BP_RS16785 | BP3338 | 1.3 | 6.98E-04 |
| BP_RS16820 | BP3344 | 1.3 | 5.09E-05 |
| BP_RS17085 | BP3398 | 1.3 | 7.38E-05 |
| BP_RS17455 | BP3470 | 1.3 | 4.47E-03 |
| BP_RS17790 | BP3534 | 1.3 | 3.02E-04 |
| BP_RS17805 | BP3537 | 1.3 | 1.42E-04 |
| BP_RS17945 | BP3564 | 1.3 | 8.89E-05 |
| BP_RS18345 | BP3644 | 1.3 | 8.03E-05 |
| BP_RS18900 | BP3754 | 1.3 | 3.50E-05 |
| BP_RS18930 | BP3760 | 1.3 | 1.03E-03 |
| BP_RS18985 | BP3772 | 1.3 | 4.41E-04 |
| BP_RS19100 | BP3795 | 1.3 | 1.98E-03 |
| BP_RS19125 | BP3799 | 1.3 | 6.85E-04 |



|            |        |     |          |
|------------|--------|-----|----------|
| BP_RS19170 | BP3808 | 1.3 | 2.41E-05 |
| BP_RS10840 | BP2169 | 1.2 | 5.93E-03 |
| BP_RS10855 | BP2172 | 1.2 | 9.96E-03 |
| BP_RS14730 | BP2933 | 1.2 | 9.45E-03 |
| BP_RS01395 | BP0273 | 1.2 | 6.06E-04 |
| BP_RS18870 | BP3748 | 1.2 | 1.54E-03 |
| BP_RS10215 | BP2044 | 1.2 | 6.83E-04 |
| BP_RS18805 | BP3734 | 1.2 | 2.99E-04 |
| BP_RS06230 | BP1247 | 1.2 | 4.50E-04 |
| BP_RS11240 | BP2248 | 1.2 | 6.78E-04 |
| BP_RS08630 | BP1732 | 1.2 | 2.66E-03 |
| BP_RS12525 | BP2501 | 1.2 | 2.70E-03 |
| BP_RS00215 | BP0039 | 1.2 | 2.18E-03 |
| BP_RS00565 | BP0107 | 1.2 | 6.60E-04 |
| BP_RS01005 | BP0195 | 1.2 | 2.15E-03 |
| BP_RS01015 | BP0197 | 1.2 | 5.34E-03 |
| BP_RS01050 | BP0204 | 1.2 | 1.66E-03 |
| BP_RS01240 | BP0242 | 1.2 | 1.15E-03 |
| BP_RS01610 | BP0318 | 1.2 | 6.98E-04 |
| BP_RS01940 | BP0383 | 1.2 | 3.29E-03 |
| BP_RS02815 | BP0560 | 1.2 | 1.71E-03 |
| BP_RS03330 | BP0665 | 1.2 | 2.05E-03 |
| BP_RS03485 | BP0696 | 1.2 | 9.16E-03 |
| BP_RS03930 | BP0790 | 1.2 | 1.82E-04 |
| BP_RS04700 | BP0945 | 1.2 | 2.29E-04 |
| BP_RS04765 | BP0958 | 1.2 | 6.14E-05 |
| BP_RS05050 | BP1016 | 1.2 | 8.05E-04 |
| BP_RS05360 | BP1076 | 1.2 | 2.96E-03 |
| BP_RS05575 | BP1120 | 1.2 | 7.20E-03 |
| BP_RS05955 | BP1197 | 1.2 | 2.13E-03 |
| BP_RS06055 | BP1216 | 1.2 | 1.56E-03 |
| BP_RS06220 | BP1245 | 1.2 | 2.79E-03 |
| BP_RS06525 | BP1306 | 1.2 | 1.89E-03 |
| BP_RS07440 | BP1490 | 1.2 | 5.51E-04 |
| BP_RS07875 | BP1575 | 1.2 | 9.25E-05 |
| BP_RS07880 | BP1576 | 1.2 | 7.36E-04 |
| BP_RS08230 | BP1651 | 1.2 | 2.32E-04 |
| BP_RS08505 | BP1707 | 1.2 | 2.74E-03 |
| BP_RS08735 | BP1753 | 1.2 | 8.65E-04 |
| BP_RS08835 | BP1772 | 1.2 | 2.19E-03 |
| BP_RS08970 | BP1798 | 1.2 | 1.37E-03 |
| BP_RS09060 | BP1816 | 1.2 | 1.44E-04 |
| BP_RS09065 | BP1817 | 1.2 | 4.91E-03 |

|            |        |     |          |
|------------|--------|-----|----------|
| BP_RS09350 | BP1876 | 1.2 | 9.38E-03 |
| BP_RS11130 | BP2226 | 1.2 | 9.60E-04 |
| BP_RS11490 | BP2299 | 1.2 | 6.29E-04 |
| BP_RS11540 | BP2309 | 1.2 | 9.56E-05 |
| BP_RS11680 | BP2332 | 1.2 | 7.15E-04 |
| BP_RS11980 | BP2394 | 1.2 | 7.30E-03 |
| BP_RS12025 | BP2403 | 1.2 | 1.64E-04 |
| BP_RS12270 | BP2452 | 1.2 | 2.59E-04 |
| BP_RS12530 | BP2502 | 1.2 | 1.12E-03 |
| BP_RS12945 | BP2578 | 1.2 | 9.36E-04 |
| BP_RS13245 | BP2638 | 1.2 | 4.83E-03 |
| BP_RS13600 | BP2708 | 1.2 | 2.91E-03 |
| BP_RS13735 | BP2735 | 1.2 | 1.71E-04 |
| BP_RS13780 | BP2746 | 1.2 | 1.62E-04 |
| BP_RS13980 | BP2786 | 1.2 | 7.88E-04 |
| BP_RS15120 | BP3012 | 1.2 | 9.32E-06 |
| BP_RS15280 | BP3040 | 1.2 | 1.97E-04 |
| BP_RS15320 | BP3047 | 1.2 | 4.61E-04 |
| BP_RS15440 | BP3071 | 1.2 | 4.93E-04 |
| BP_RS15460 | BP3075 | 1.2 | 3.21E-04 |
| BP_RS15840 | BP3149 | 1.2 | 1.68E-04 |
| BP_RS16250 | BP3231 | 1.2 | 5.76E-03 |
| BP_RS16600 | BP3302 | 1.2 | 9.26E-03 |
| BP_RS17090 | BP3399 | 1.2 | 1.89E-03 |
| BP_RS17220 | BP3425 | 1.2 | 1.85E-03 |
| BP_RS17310 | BP3443 | 1.2 | 8.66E-03 |
| BP_RS17550 | BP3490 | 1.2 | 5.14E-05 |
| BP_RS17980 | BP3571 | 1.2 | 2.20E-03 |
| BP_RS17990 | BP3573 | 1.2 | 8.71E-03 |
| BP_RS18070 | BP3589 | 1.2 | 8.05E-04 |
| BP_RS18400 | BP3654 | 1.2 | 2.59E-05 |
| BP_RS18895 | BP3753 | 1.2 | 3.30E-04 |
| BP_RS19240 | BP3822 | 1.2 | 1.71E-03 |
| BP_RS19245 | BP3823 | 1.2 | 2.66E-03 |
| BP_RS19795 | BP1083 | 1.2 | 1.11E-04 |
| BP_RS01330 | BP0260 | 1.1 | 3.19E-04 |
| BP_RS04920 | BP0990 | 1.1 | 6.57E-04 |
| BP_RS09515 | BP1910 | 1.1 | 9.56E-04 |
| BP_RS15415 | BP3066 | 1.1 | 7.60E-03 |
| BP_RS12165 | BP2431 | 1.1 | 7.50E-04 |
| BP_RS13490 | BP2687 | 1.1 | 3.78E-04 |
| BP_RS05560 | BP1117 | 1.1 | 3.08E-04 |
| BP_RS04000 | BP0802 | 1.1 | 5.62E-03 |

|            |        |     |          |
|------------|--------|-----|----------|
| BP_RS16440 | BP3270 | 1.1 | 7.60E-04 |
| BP_RS00465 | BP0088 | 1.1 | 7.38E-05 |
| BP_RS00615 | BP0117 | 1.1 | 3.89E-03 |
| BP_RS01060 | BP0206 | 1.1 | 2.00E-03 |
| BP_RS01145 | BP0223 | 1.1 | 9.18E-04 |
| BP_RS01350 | BP0264 | 1.1 | 3.57E-03 |
| BP_RS01615 | BP0319 | 1.1 | 1.15E-03 |
| BP_RS01700 | BP0335 | 1.1 | 2.42E-03 |
| BP_RS01845 | BP0364 | 1.1 | 7.30E-04 |
| BP_RS02285 | BP0451 | 1.1 | 4.34E-04 |
| BP_RS02480 | BP0491 | 1.1 | 7.80E-04 |
| BP_RS02775 | BP0552 | 1.1 | 2.70E-03 |
| BP_RS02820 | BP0561 | 1.1 | 7.07E-03 |
| BP_RS03495 | BP0698 | 1.1 | 2.59E-03 |
| BP_RS03695 | BP0744 | 1.1 | 9.70E-03 |
| BP_RS03925 | BP0789 | 1.1 | 3.80E-03 |
| BP_RS04505 | BP0905 | 1.1 | 1.25E-04 |
| BP_RS04705 | BP0946 | 1.1 | 3.53E-03 |
| BP_RS04735 | BP0952 | 1.1 | 6.78E-04 |
| BP_RS04785 | BP0962 | 1.1 | 1.24E-03 |
| BP_RS04965 | BP0999 | 1.1 | 1.17E-03 |
| BP_RS05265 | BP1058 | 1.1 | 5.28E-03 |
| BP_RS05305 | BP1066 | 1.1 | 1.95E-04 |
| BP_RS05350 | BP1074 | 1.1 | 6.88E-04 |
| BP_RS05550 | BP1115 | 1.1 | 2.96E-04 |
| BP_RS05720 | BP1149 | 1.1 | 1.89E-03 |
| BP_RS06380 | BP1277 | 1.1 | 8.74E-03 |
| BP_RS06495 | BP1300 | 1.1 | 2.32E-03 |
| BP_RS07405 | BP1483 | 1.1 | 1.36E-03 |
| BP_RS07760 | BP1551 | 1.1 | 5.65E-04 |
| BP_RS08125 | BP1630 | 1.1 | 3.82E-04 |
| BP_RS08290 | BP1664 | 1.1 | 4.07E-03 |
| BP_RS08465 | BP1699 | 1.1 | 6.84E-04 |
| BP_RS08980 | BP1800 | 1.1 | 5.08E-03 |
| BP_RS09000 | BP1804 | 1.1 | 1.05E-03 |
| BP_RS09400 | BP1886 | 1.1 | 4.12E-03 |
| BP_RS09490 | BP1905 | 1.1 | 6.21E-03 |
| BP_RS09830 | BP1972 | 1.1 | 3.31E-04 |
| BP_RS10210 | BP2043 | 1.1 | 2.79E-03 |
| BP_RS10285 | BP2058 | 1.1 | 2.26E-03 |
| BP_RS10375 | BP2077 | 1.1 | 1.78E-03 |
| BP_RS10380 | BP2078 | 1.1 | 1.34E-03 |
| BP_RS10965 | BP2192 | 1.1 | 4.14E-04 |

|            |        |     |          |
|------------|--------|-----|----------|
| BP_RS10975 | BP2194 | 1.1 | 6.84E-04 |
| BP_RS11000 | BP2199 | 1.1 | 9.85E-04 |
| BP_RS11010 | BP2201 | 1.1 | 4.07E-03 |
| BP_RS11110 | BP2222 | 1.1 | 2.29E-03 |
| BP_RS11355 | BP2271 | 1.1 | 1.39E-03 |
| BP_RS12225 | BP2443 | 1.1 | 5.57E-04 |
| BP_RS12240 | BP2446 | 1.1 | 8.40E-03 |
| BP_RS12365 | BP2470 | 1.1 | 7.94E-04 |
| BP_RS12720 | BP2537 | 1.1 | 1.94E-03 |
| BP_RS13615 | BP2711 | 1.1 | 2.79E-03 |
| BP_RS13770 | BP2744 | 1.1 | 5.72E-03 |
| BP_RS14140 | BP2818 | 1.1 | 3.37E-03 |
| BP_RS14240 |        | 1.1 | 1.34E-04 |
| BP_RS14515 | BP2890 | 1.1 | 1.04E-03 |
| BP_RS14520 | BP2891 | 1.1 | 1.22E-03 |
| BP_RS14560 | BP2899 | 1.1 | 1.98E-03 |
| BP_RS14610 | BP2909 | 1.1 | 1.53E-03 |
| BP_RS14960 | BP2980 | 1.1 | 2.75E-04 |
| BP_RS15125 | BP3013 | 1.1 | 1.00E-03 |
| BP_RS15210 | BP3030 | 1.1 | 2.59E-03 |
| BP_RS16170 | BP3215 | 1.1 | 4.59E-03 |
| BP_RS16350 | BP3251 | 1.1 | 3.35E-04 |
| BP_RS16725 | BP3326 | 1.1 | 3.53E-03 |
| BP_RS16835 | BP3347 | 1.1 | 9.42E-03 |
| BP_RS16840 | BP3348 | 1.1 | 6.29E-04 |
| BP_RS17170 | BP3415 | 1.1 | 2.38E-03 |
| BP_RS17285 | BP3438 | 1.1 | 3.84E-03 |
| BP_RS17545 | BP3489 | 1.1 | 3.29E-04 |
| BP_RS17725 | BP3524 | 1.1 | 2.11E-03 |
| BP_RS18110 | BP3597 | 1.1 | 1.95E-03 |
| BP_RS18775 | BP3728 | 1.1 | 9.17E-04 |
| BP_RS18785 | BP3730 | 1.1 | 3.44E-03 |
| BP_RS18995 | BP3774 | 1.1 | 7.11E-04 |
| BP_RS19950 |        | 1.1 | 3.29E-04 |
| BP_RS03995 | BP0801 | 1   | 9.70E-03 |
| BP_RS04375 | BP0879 | 1   | 8.60E-03 |
| BP_RS01225 | BP0239 | 1   | 6.52E-04 |
| BP_RS17070 | BP3395 | 1   | 5.58E-03 |
| BP_RS17530 | BP3486 | 1   | 3.89E-03 |
| BP_RS19020 | BP3779 | 1   | 4.70E-03 |
| BP_RS05960 | BP1198 | 1   | 1.69E-03 |
| BP_RS01475 | BP0289 | 1   | 4.53E-03 |
| BP_RS02235 | BP0440 | 1   | 2.93E-03 |

|            |         |      |          |
|------------|---------|------|----------|
| BP_RS02630 | BP0521  | 1    | 2.18E-03 |
| BP_RS04340 | BP0870  | 1    | 1.89E-04 |
| BP_RS04680 | BP0941  | 1    | 2.05E-03 |
| BP_RS06245 | BP1250  | 1    | 1.33E-03 |
| BP_RS07355 | BP1473  | 1    | 1.27E-03 |
| BP_RS07365 | BP1475  | 1    | 4.38E-04 |
| BP_RS07675 | BP1536  | 1    | 3.73E-04 |
| BP_RS07820 | BP1563  | 1    | 7.92E-04 |
| BP_RS07890 | BP1578  | 1    | 1.90E-03 |
| BP_RS08565 | BP1719  | 1    | 5.48E-03 |
| BP_RS10990 | BP2197  | 1    | 7.01E-03 |
| BP_RS11695 | BP2335  | 1    | 7.50E-04 |
| BP_RS11755 | BP2347  | 1    | 3.18E-03 |
| BP_RS12065 | BP2411  | 1    | 4.12E-03 |
| BP_RS12280 | BP2454  | 1    | 1.33E-03 |
| BP_RS12870 | BP2567  | 1    | 1.09E-03 |
| BP_RS13810 | BP2752  | 1    | 7.65E-04 |
| BP_RS14070 | BP2804  | 1    | 3.96E-03 |
| BP_RS14525 | BP2892  | 1    | 6.09E-03 |
| BP_RS15100 | BP3008  | 1    | 5.45E-03 |
| BP_RS15165 | BP3021  | 1    | 9.81E-04 |
| BP_RS15285 | BP3041  | 1    | 2.42E-03 |
| BP_RS16165 | BP3214  | 1    | 9.60E-03 |
| BP_RS18150 | BP3605  | 1    | 1.04E-03 |
| BP_RS19930 |         | 1    | 5.08E-03 |
| BP_RS00815 | BP0157  | -1   | 5.63E-03 |
| BP_RS01075 | BP0209  | -1   | 2.59E-03 |
| BP_RS01725 | BP0340  | -1   | 9.89E-03 |
| BP_RS02790 | BP0555  | -1   | 1.94E-03 |
| BP_RS03445 |         | -1   | 9.70E-03 |
| BP_RS04875 | BP0981  | -1   | 8.43E-04 |
| BP_RS07545 | BP1510  | -1   | 5.39E-03 |
| BP_RS08755 | BP1757A | -1   | 5.60E-03 |
| BP_RS10665 | BP2133  | -1   | 1.98E-04 |
| BP_RS14065 | BP2803  | -1   | 2.11E-03 |
| BP_RS14095 | BP2809  | -1   | 5.71E-03 |
| BP_RS14765 | BP2940  | -1   | 1.53E-03 |
| BP_RS18760 | BP3725  | -1   | 5.28E-03 |
| BP_RS00305 | BP0057  | -1.1 | 8.37E-03 |
| BP_RS09965 | BP1999  | -1.1 | 8.95E-03 |
| BP_RS09930 | BP1992  | -1.1 | 6.97E-03 |
| BP_RS19220 | BP3818  | -1.1 | 9.82E-03 |
| BP_RS09955 | BP1997  | -1.1 | 5.12E-03 |

|            |        |      |          |
|------------|--------|------|----------|
| BP_RS00660 | BP0126 | -1.1 | 4.64E-03 |
| BP_RS01720 | BP0339 | -1.1 | 3.53E-03 |
| BP_RS01745 | BP0344 | -1.1 | 2.05E-03 |
| BP_RS02960 | BP0591 | -1.1 | 2.97E-03 |
| BP_RS06540 |        | -1.1 | 7.35E-04 |
| BP_RS08485 | BP1703 | -1.1 | 8.07E-03 |
| BP_RS09280 | BP1860 | -1.1 | 6.74E-03 |
| BP_RS10620 | BP2125 | -1.1 | 2.81E-03 |
| BP_RS12030 | BP2404 | -1.1 | 2.29E-03 |
| BP_RS12795 | BP2552 | -1.1 | 8.73E-03 |
| BP_RS16860 | BP3352 | -1.1 | 9.73E-03 |
| BP_RS17695 | BP3518 | -1.1 | 9.80E-03 |
| BP_RS19315 | BP3837 | -1.1 | 5.45E-03 |
| BP_RS09820 | BP1970 | -1.2 | 2.89E-03 |
| BP_RS09975 | BP2001 | -1.2 | 3.53E-03 |
| BP_RS07945 | BP1591 | -1.2 | 5.47E-03 |
| BP_RS09945 | BP1995 | -1.2 | 9.51E-03 |
| BP_RS01445 | BP0283 | -1.2 | 4.35E-03 |
| BP_RS01470 | BP0288 | -1.2 | 9.03E-03 |
| BP_RS01555 | BP0306 | -1.2 | 8.34E-03 |
| BP_RS02660 | BP0529 | -1.2 | 4.71E-03 |
| BP_RS02770 | BP0551 | -1.2 | 8.83E-03 |
| BP_RS07800 | BP1559 | -1.2 | 6.22E-03 |
| BP_RS07935 | BP1589 | -1.2 | 9.79E-03 |
| BP_RS08065 | BP1615 | -1.2 | 5.12E-03 |
| BP_RS09050 | BP1814 | -1.2 | 1.44E-03 |
| BP_RS09525 | BP1912 | -1.2 | 1.25E-03 |
| BP_RS09585 | BP1923 | -1.2 | 3.00E-03 |
| BP_RS09870 | BP1980 | -1.2 | 5.04E-03 |
| BP_RS10810 | BP2163 | -1.2 | 1.67E-03 |
| BP_RS13950 | BP2780 | -1.2 | 5.93E-03 |
| BP_RS14120 | BP2814 | -1.2 | 2.17E-03 |
| BP_RS14665 | BP2920 | -1.2 | 6.08E-04 |
| BP_RS15500 |        | -1.2 | 9.02E-03 |
| BP_RS18745 | BP3722 | -1.2 | 9.87E-03 |
| BP_RS20000 | BP0167 | -1.2 | 1.18E-03 |
| BP_RS20130 | BP0176 | -1.2 | 2.71E-04 |
| BP_RS20030 |        | -1.3 | 2.80E-03 |
| BP_RS00240 | BP0044 | -1.3 | 8.83E-03 |
| BP_RS01300 | BP0254 | -1.3 | 8.76E-03 |
| BP_RS02095 | BP0413 | -1.3 | 3.64E-03 |
| BP_RS02640 | BP0523 | -1.3 | 8.32E-03 |
| BP_RS02830 | BP0563 | -1.3 | 3.24E-03 |

|            |        |      |          |
|------------|--------|------|----------|
| BP_RS02850 | BP0567 | -1.3 | 6.01E-04 |
| BP_RS03370 | BP0673 | -1.3 | 2.72E-03 |
| BP_RS06025 | BP1210 | -1.3 | 9.73E-03 |
| BP_RS09970 | BP2000 | -1.3 | 7.13E-03 |
| BP_RS10035 | BP2013 | -1.3 | 4.09E-03 |
| BP_RS11435 | BP2287 | -1.3 | 4.59E-03 |
| BP_RS13730 | BP2734 | -1.3 | 1.09E-03 |
| BP_RS14460 | BP2879 | -1.3 | 3.38E-03 |
| BP_RS16670 | BP3315 | -1.3 | 8.42E-03 |
| BP_RS18105 | BP3596 | -1.3 | 2.65E-04 |
| BP_RS19030 |        | -1.3 | 8.58E-03 |
| BP_RS09825 | BP1971 | -1.4 | 1.89E-03 |
| BP_RS01765 | BP0348 | -1.4 | 6.85E-03 |
| BP_RS10015 | BP2009 | -1.4 | 6.48E-03 |
| BP_RS11340 | BP2268 | -1.4 | 6.19E-03 |
| BP_RS00715 | BP0136 | -1.4 | 4.29E-03 |
| BP_RS02090 | BP0412 | -1.4 | 7.32E-03 |
| BP_RS02940 | BP0585 | -1.4 | 8.99E-03 |
| BP_RS03005 | BP0600 | -1.4 | 5.05E-03 |
| BP_RS03195 | BP0639 | -1.4 | 5.57E-03 |
| BP_RS03850 | BP0773 | -1.4 | 5.26E-03 |
| BP_RS06020 | BP1209 | -1.4 | 8.10E-03 |
| BP_RS09575 | BP1921 | -1.4 | 9.09E-03 |
| BP_RS09865 | BP1979 | -1.4 | 1.55E-03 |
| BP_RS10490 | BP2100 | -1.4 | 5.35E-03 |
| BP_RS10635 | BP2127 | -1.4 | 6.19E-03 |
| BP_RS11910 | BP2380 | -1.4 | 7.02E-03 |
| BP_RS12680 | BP2529 | -1.4 | 9.03E-03 |
| BP_RS14190 | BP2827 | -1.4 | 8.34E-03 |
| BP_RS14565 | BP2900 | -1.4 | 7.77E-03 |
| BP_RS09285 | BP1861 | -1.5 | 4.47E-03 |
| BP_RS12430 | BP2482 | -1.5 | 8.40E-03 |
| BP_RS01570 | BP0310 | -1.5 | 4.25E-03 |
| BP_RS03160 | BP0632 | -1.5 | 7.57E-03 |
| BP_RS03525 | BP0704 | -1.5 | 1.34E-08 |
| BP_RS05540 | BP1113 | -1.5 | 1.33E-03 |
| BP_RS06105 | BP1226 | -1.5 | 9.03E-03 |
| BP_RS08135 | BP1632 | -1.5 | 6.78E-03 |
| BP_RS08905 | BP1786 | -1.5 | 5.56E-03 |
| BP_RS09125 | BP1828 | -1.5 | 5.05E-03 |
| BP_RS09425 | BP1892 | -1.5 | 7.70E-03 |
| BP_RS09765 | BP1957 | -1.5 | 9.80E-03 |
| BP_RS09940 | BP1994 | -1.5 | 2.27E-03 |

|            |         |      |          |
|------------|---------|------|----------|
| BP_RS10530 | BP2108  | -1.5 | 6.86E-03 |
| BP_RS10560 | BP2113  | -1.5 | 8.84E-03 |
| BP_RS11365 | BP2273  | -1.5 | 1.89E-03 |
| BP_RS14425 | BP2872  | -1.5 | 2.89E-03 |
| BP_RS15495 | BP3082  | -1.5 | 3.07E-03 |
| BP_RS16095 | BP3199  | -1.5 | 8.97E-03 |
| BP_RS16925 | BP3365  | -1.5 | 4.64E-03 |
| BP_RS19895 |         | -1.5 | 8.40E-03 |
| BP_RS20210 |         | -1.5 | 9.12E-03 |
| BP_RS06605 | BP1323  | -1.6 | 4.59E-03 |
| BP_RS06820 | BP1368  | -1.6 | 4.92E-03 |
| BP_RS06955 |         | -1.6 | 9.47E-03 |
| BP_RS06980 | BP1401  | -1.6 | 9.38E-03 |
| BP_RS00755 | BP0144  | -1.6 | 7.51E-03 |
| BP_RS01185 | BP0231  | -1.6 | 8.98E-03 |
| BP_RS01965 | BP0389  | -1.6 | 6.21E-03 |
| BP_RS08165 | BP1638  | -1.6 | 7.30E-03 |
| BP_RS08275 | BP1660  | -1.6 | 4.27E-03 |
| BP_RS09130 | BP1829  | -1.6 | 6.00E-03 |
| BP_RS09160 | BP1835  | -1.6 | 8.38E-03 |
| BP_RS10640 | BP2128  | -1.6 | 2.81E-03 |
| BP_RS10795 | BP2160  | -1.6 | 2.34E-03 |
| BP_RS11370 | BP2274  | -1.6 | 5.16E-03 |
| BP_RS16110 | BP3202  | -1.6 | 6.49E-03 |
| BP_RS18720 | BP3717  | -1.6 | 9.96E-03 |
| BP_RS19825 | BP1639A | -1.6 | 9.34E-03 |
| BP_RS20055 | BP1988  | -1.6 | 3.57E-03 |
| BP_RS06610 | BP1324  | -1.7 | 7.33E-03 |
| BP_RS13740 | BP2736  | -1.7 | 9.09E-03 |
| BP_RS02915 | BP0580  | -1.7 | 7.81E-03 |
| BP_RS08175 | BP1640  | -1.7 | 3.26E-03 |
| BP_RS09135 | BP1830  | -1.7 | 5.15E-03 |
| BP_RS12610 | BP2517  | -1.7 | 8.40E-03 |
| BP_RS14465 | BP2880  | -1.7 | 2.94E-03 |
| BP_RS18700 | BP3713  | -1.7 | 1.89E-03 |
| BP_RS08160 | BP1637  | -1.8 | 7.38E-05 |

### MR-MT28 vs MS-MT28

| Gene       | Gene_old | log2FoldChange | padj     |
|------------|----------|----------------|----------|
| BP_RS01825 | BP0360   | 1.7            | 3.10E-03 |
| BP_RS01835 | BP0362   | 1.6            | 3.10E-03 |
| BP_RS18670 | BP3707   | 1.4            | 5.87E-04 |
| BP_RS17370 | BP3453   | 1.3            | 4.84E-03 |



|            |        |      |          |
|------------|--------|------|----------|
| BP_RS15955 | BP3172 | 1    | 4.84E-03 |
| BP_RS13650 | BP2718 | -1.1 | 5.87E-04 |
| BP_RS18225 | BP3620 | -1.1 | 6.63E-03 |
| BP_RS18235 | BP3622 | -1.2 | 9.66E-03 |
